# Supplementary material for: Usage Trends of Open Access and Local Journals: A Korean Case Study
Source: PLoS One. 2016 May 19;11(5):e0155843. doi: 10.1371/journal.pone.0155843 (PMC4873189; doi:10.1371/journal.pone.0155843)
Supplement: S1 Table — (XLSX) [file pone.0155843.s002.xlsx]

## Sheet: Sheet1
Title	ISSN	SCIE	Column 5	OAJ	OA Publisher
ACAD MANAGE J	0001-4273	SSCI
ACAD MANAGE PERSPECT	1558-9080	SSCI
ACAD MANAGE REV	0363-7425	SSCI
ACCIDENT ANAL PREV	0001-4575	SSCI
ACCOUNT FINANC	0810-5391	SSCI
ACCOUNT HORIZ	0888-7993	SSCI
ACCOUNT ORG SOC	0361-3682	SSCI
ACCOUNT REV	0001-4826	SSCI
ACCREDITATION AND QUALITY ASSURANCE	0949-1775	SCIE	ACCREDITATION AND QUALITY ASSURANCE
ACTA ANAESTHESIOLOGICA SCANDINAVICA	0001-5172	SCIE	ACTA ANAESTHESIOLOGICA SCANDINAVICA
ACTA BIOTHEORETICA	0001-5342	SCIE	ACTA BIOTHEORETICA
ACTA SOCIOL	0001-6993	SSCI
ADMIN SOC	0095-3997	SSCI
ADMIN SCI QUART	0001-8392	SSCI
ADVANCES IN AGRONOMY	0065-2113	SCIE	ADVANCES IN AGRONOMY
ADV EXP SOC PSYCHOL	0065-2601	SSCI
AFR STUD REV	0002-0206	SSCI
AGEING SOC	0144-686X	SSCI
AGING MENT HEALTH	1360-7863	SSCI
AGR ECON-BLACKWELL	0169-5150	SSCI
AGR HUM VALUES	0889-048X	SSCI
AMERASIA JOURNAL	0044-7471	AHCI
AMERICAN BOOK REVIEW	0149-9408	AHCI
AM ETHNOL	0094-0496	SSCI
AM J AGR ECON	0002-9092	SSCI
AM J COMMUN PSYCHOL	0091-0562	SSCI
AM J LAW MED	0098-8588	SSCI
AM J POLIT SCI	0092-5853	SSCI
AMERICAN PHILOSOPHICAL QUARTERLY	0003-0481	AHCI
AM REV PUBLIC ADM	0275-0740	SSCI
AM SOCIOL REV	0003-1224	SSCI
ANALYSIS	0003-2638	AHCI
ANNALES DE BIOLOGIE CLINIQUE	0003-3898	SCIE	ANNALES DE BIOLOGIE CLINIQUE
ANNALS OF OPERATIONS RESEARCH	0254-5330	SCIE	ANNALS OF OPERATIONS RESEARCH
ANN REGIONAL SCI	0570-1864	SSCI
ANN AM ACAD POLIT SS	0002-7162	SSCI
ANN ASSOC AM GEOGR	0004-5608	SSCI
ANN TOURISM RES	0160-7383	SSCI
ANNU REV ANTHROPOL	0084-6570	SSCI
JOURNAL OF THE SOUTH AFRICAN VETERINARY ASSOCIATION-TYDSKRIF VAN DIE SUID-AFRIKAANSE VETERINERE VERENIGING	0038-2809	SCIE	JOURNAL OF THE SOUTH AFRICAN VETERINARY ASSOCIATION-TYDSKRIF VAN DIE SUID-AFRIKAANSE VETERINERE VERENIGING
MATERIALS & DESIGN	0261-3069	SCIE	MATERIALS & DESIGN
AUST J EARLY CHILD	0312-5033	SSCI
PROCEEDINGS OF THE ROYAL SOCIETY-MATHEMATICAL AND PHYSICAL SCIENCES	0962-8444	SCIE	PROCEEDINGS OF THE ROYAL SOCIETY-MATHEMATICAL AND PHYSICAL SCIENCES
ANNUAL REVIEW OF ENTOMOLOGY	0066-4170	SCIE	ANNUAL REVIEW OF ENTOMOLOGY
ANNU REV PSYCHOL	0066-4308	SSCI
ANNU REV SOCIOL	0360-0572	SSCI
ANNUAL REVIEWS IN CONTROL	1367-5788	SCIE	ANNUAL REVIEWS IN CONTROL
ANTHROPOL QUART	0003-5491	SSCI
ANTHROPOL EDUC QUART	0161-7761	SSCI
ANTIPODE	0066-4812	SSCI
ANTIQUITY	0003-598X	SSCI
FORBES	0015-6914	SSCI
HYDROCARBON PROCESSING	0018-8190	SCIE	HYDROCARBON PROCESSING
ANXIETY STRESS COPIN	1061-5806	SSCI
APPL COGNITIVE PSYCH	0888-4080	SSCI
APPL DEV SCI	1088-8691	SSCI
APPL ECON	0003-6846	SSCI
APPL ECON LETT	1350-4851	SSCI
SYNTAX AND SEMANTICS	0092-4563	AHCI
SAMJ SOUTH AFRICAN MEDICAL JOURNAL	0256-9574	SCIE	SAMJ SOUTH AFRICAN MEDICAL JOURNAL	OAJ	Health and Medical Publishing Group
DRUG DEVELOPMENT RESEARCH	0272-4391	SCIE	DRUG DEVELOPMENT RESEARCH
HUM ECOL	0300-7839	SSCI
HIGH TEMPERATURE MATERIALS AND PROCESSES	0334-6455	SCIE	HIGH TEMPERATURE MATERIALS AND PROCESSES
APPL PSYCHOLINGUIST	0142-7164	SSCI
APPL PSYCH MEAS	0146-6216	SSCI
APPL PSYCHOL-INT REV	0269-994X	SSCI
APPL PSYCHOPHYS BIOF	1090-0586	SSCI
APPLIED STOCHASTIC MODELS IN BUSINESS AND INDUSTRY	1524-1904	SCIE	APPLIED STOCHASTIC MODELS IN BUSINESS AND INDUSTRY
HOKKAIDO MATHEMATICAL JOURNAL	0385-4035	SCIE	HOKKAIDO MATHEMATICAL JOURNAL
GENETIKA-BELGRADE	0534-0012	SCIE	GENETIKA-BELGRADE	OAJ	Serbian Genetics Society
ARCHAEA-AN INTERNATIONAL MICROBIOLOGICAL JOURNAL	1472-3646	SCIE	ARCHAEA-AN INTERNATIONAL MICROBIOLOGICAL JOURNAL	OAJ	Hindawi Publishing Corporation
ARCHIV FUR GESCHICHTE DER PHILOSOPHIE	0003-9101	AHCI
EXPLORATION GEOPHYSICS	0812-3985	SCIE	EXPLORATION GEOPHYSICS
SPECTROSCOPY	0887-6703	SCIE	SPECTROSCOPY
IMPLANTOLOGIE	0943-9692	SCIE	IMPLANTOLOGIE
MATERIALS AND CORROSION-WERKSTOFFE UND KORROSION	0947-5117	SCIE	MATERIALS AND CORROSION-WERKSTOFFE UND KORROSION
JOURNAL OF UNIVERSAL COMPUTER SCIENCE	0948-695X	SCIE	JOURNAL OF UNIVERSAL COMPUTER SCIENCE
ARCH EUR SOCIOL	0003-9756	SSCI
ARCH CLIN NEUROPSYCH	0887-6177	SSCI
INTERNATIONAL JOURNAL OF SEDIMENT RESEARCH	1001-6279	SCIE	INTERNATIONAL JOURNAL OF SEDIMENT RESEARCH
HEMATOLOGY	1024-5332	SCIE	HEMATOLOGY
CONTINUUM-J MEDIA CU	1030-4312	SSCI
PHYSICAL REVIEW A	1050-2947	SCIE	PHYSICAL REVIEW A
PUBLICATIONS OF THE ASTRONOMICAL SOCIETY OF AUSTRALIA	1323-3580	SCIE	PUBLICATIONS OF THE ASTRONOMICAL SOCIETY OF AUSTRALIA
JOURNAL OF NONLINEAR AND CONVEX ANALYSIS	1345-4773	SCIE	JOURNAL OF NONLINEAR AND CONVEX ANALYSIS
MATERIALS TRANSACTIONS	1345-9678	SCIE	MATERIALS TRANSACTIONS
JOURNAL OF PHARMACOLOGICAL SCIENCES	1347-8613	SCIE	JOURNAL OF PHARMACOLOGICAL SCIENCES	OAJ	The Japanese Pharmacological Society
GERIATR GERONTOL INT	1444-1586	SSCI
JOURNAL OF INFLAMMATION-LONDON	1476-9255	SCIE	JOURNAL OF INFLAMMATION-LONDON	OAJ	BioMed Central
PROGRESS IN TRANSPLANTATION	1526-9248	SCIE	PROGRESS IN TRANSPLANTATION
NANOSCALE AND MICROSCALE THERMOPHYSICAL ENGINEERING	1556-7265	SCIE	NANOSCALE AND MICROSCALE THERMOPHYSICAL ENGINEERING
APPLIED OPTICS	1559-128X	SCIE	APPLIED OPTICS
PROGRESS IN ELECTROMAGNETICS RESEARCH-PIER	1559-8985	SCIE	PROGRESS IN ELECTROMAGNETICS RESEARCH-PIER	OAJ	EMW Publishing
ARCH SEX BEHAV	0004-0002	SSCI
PLANT PATHOLOGY JOURNAL	1598-2254	SCIE	PLANT PATHOLOGY JOURNAL
REVIEWS ON ADVANCED MATERIALS SCIENCE	1606-5131	SCIE	REVIEWS ON ADVANCED MATERIALS SCIENCE
EARTHQUAKE ENGINEERING AND ENGINEERING VIBRATION	1671-3664	SCIE	EARTHQUAKE ENGINEERING AND ENGINEERING VIBRATION
ARCTIC ANTHROPOL	0066-6939	SSCI
DRUGS OF TODAY	1699-3993	SCIE	DRUGS OF TODAY
AREA	0004-0894	SSCI
STOCHASTICS-AN INTERNATIONAL JOURNAL OF PROBABILITY AND STOCHASTIC PROCESSES	1744-2508	SCIE	STOCHASTICS-AN INTERNATIONAL JOURNAL OF PROBABILITY AND STOCHASTIC PROCESSES
JOURNAL OF FOOD SAFETY	1745-4565	SCIE	JOURNAL OF FOOD SAFETY
ENVIRONMENTAL RESEARCH LETTERS	1748-9326	SCIE	ENVIRONMENTAL RESEARCH LETTERS	OAJ	Institute of Physics (IoP)
HUMAN CELL	1749-0774	SCIE	HUMAN CELL
NEUROPSYCHIATRY	1758-2008	SCIE	NEUROPSYCHIATRY
BRAZILIAN ORAL RESEARCH	1806-8324	SCIE	BRAZILIAN ORAL RESEARCH	OAJ	Sociedade Brasileira de Pesquisa Odontológica
ANTI-CANCER AGENTS IN MEDICINAL CHEMISTRY	1871-5206	SCIE	ANTI-CANCER AGENTS IN MEDICINAL CHEMISTRY
CIRCULATION-HEART FAILURE	1941-3289	SCIE	CIRCULATION-HEART FAILURE
AGING-US	1945-4589	SCIE	AGING-US	OAJ	Impact Journals, LLC
ENTOMOLOGICA AMERICANA	1947-5136	SCIE	ENTOMOLOGICA AMERICANA
JOURNAL OF KOREAN NEUROSURGICAL SOCIETY	2005-3711	SCIE	JOURNAL OF KOREAN NEUROSURGICAL SOCIETY
ANDROLOGY	2047-2919	SCIE	ANDROLOGY
ASIA PAC BUS REV	1360-2381	SSCI
ASIA PAC EDUC REV	1598-1037	SSCI
ASIA PAC J MANAG	0217-4561	SSCI
ASIA PAC J SOC WORK	0218-5385	SSCI
ASIAN PAC MIGR J	0117-1968	SSCI
FRONTIERS OF EARTH SCIENCE	2095-0195	SCIE	FRONTIERS OF EARTH SCIENCE
KYOTO JOURNAL OF MATHEMATICS	2156-2261	SCIE	KYOTO JOURNAL OF MATHEMATICS
ASIAN BUS MANAG	1472-4782	SSCI
ASIAN ECON J	1351-3958	SSCI
ASIAN ECON PAP	1535-3516	SSCI
ASIAN ECON POLICY R	1832-8105	SSCI
ASIAN J COMMUN	0129-2986	SSCI
INDIAN JOURNAL OF OTOLARYNGOLOGY AND HEAD & NECK SURGERY	2231-3796	SCIE	INDIAN JOURNAL OF OTOLARYNGOLOGY AND HEAD & NECK SURGERY
ASIAN J SOC PSYCHOL	1367-2223	SSCI
ASIAN J WOMEN STUD	1225-9276	SSCI
ASIAN PERSPECT-SEOUL	0258-9184	SSCI
JOURNAL OF THE KOREAN SURGICAL SOCIETY	2233-7903	SCIE	JOURNAL OF THE KOREAN SURGICAL SOCIETY	OAJ	Korean Surgical Society
KOREAN JOURNAL OF ORTHODONTICS	2234-7518	SCIE	KOREAN JOURNAL OF ORTHODONTICS	OAJ	Korean Association of Orthodontists
ASIAN SURV	0004-4687	SSCI
ASIAN WOMEN	1225-925X	SSCI
ASIA-PAC J ACCOUNT E	1608-1625	SSCI
ASSESSMENT	1073-1911	SSCI
AUDITING-J PRACT TH	0278-0380	SSCI
AUSTRALASIAN JOURNAL OF PHILOSOPHY	0004-8402	AHCI
AUST J AGR RESOUR EC	1364-985X	SSCI
AUST J INT AFF	1035-7718	SSCI
AUST J PSYCHOL	0004-9530	SSCI
AUST J PUBL ADMIN	0313-6647	SSCI
AUST PSYCHOL	0005-0067	SSCI
AUTISM	1362-3613	SSCI
BASIC APPL SOC PSYCH	0197-3533	SSCI
BEHAV MODIF	0145-4455	SSCI
BEHAV INFORM TECHNOL	0144-929X	SSCI
BERL J SOZIOL	0863-1808	SSCI
BERLINER UND MUNCHENER TIERARZTLICHE WOCHENSCHRIFT	0005-9366	SCIE	BERLINER UND MUNCHENER TIERARZTLICHE WOCHENSCHRIFT
BILING-LANG COGN	1366-7289	SSCI
BIOLOGIA	0006-3088	SCIE	BIOLOGIA
BONE MARROW TRANSPLANTATION	0268-3369	SCIE	BONE MARROW TRANSPLANTATION
BRIT J CLIN PSYCHOL	0144-6657	SSCI
BRIT J DEV PSYCHOL	0261-510X	SSCI
BRIT J EDUC PSYCHOL	0007-0998	SSCI
BRIT J HEALTH PSYCH	1359-107X	SSCI
BRIT J IND RELAT	0007-1080	SSCI
BRIT J MANAGE	1045-3172	SSCI
BRIT J POLIT SCI	0007-1234	SSCI
BRIT J PSYCHOL	0007-1269	SSCI
BRIT J SOC PSYCHOL	0144-6665	SSCI
BRIT J SOC WORK	0045-3102	SSCI
BRIT J SOCIOL EDUC	0142-5692	SSCI
BROOKINGS PAP ECO AC	0007-2303	SSCI
BULLETIN OF INSECTOLOGY	1721-8861	SCIE	BULLETIN OF INSECTOLOGY
B ATOM SCI	0096-3402	SSCI
BULLETIN OF THE SCHOOL OF ORIENTAL AND AFRICAN STUDIES-UNIVERSITY OF LONDON	0041-977X	AHCI
BUS HIST	0007-6791	SSCI
BUS HIST REV	0007-6805	SSCI
ADV STRATEG MANAGE	0742-3322	SSCI
CALCULUS OF VARIATIONS AND PARTIAL DIFFERENTIAL EQUATIONS	0944-2669	SCIE	CALCULUS OF VARIATIONS AND PARTIAL DIFFERENTIAL EQUATIONS
CALIF LAW REV	0008-1221	SSCI
CALIF MANAGE REV	0008-1256	SSCI
CAMB J ECON	0309-166X	SSCI
CAN J ADM SCI	0825-0383	SSCI
CAN J BEHAV SCI	0008-400X	SSCI
CAN J SOCIOL	0318-6431	SSCI		OAJ	University of Alberta
CAREER DEV INT	1362-0436	SSCI
CARYOLOGIA	0008-7114	SCIE	CARYOLOGIA
CEREAL CHEMISTRY	0009-0352	SCIE	CEREAL CHEMISTRY
CHEMICO-BIOLOGICAL INTERACTIONS	0009-2797	SCIE	CHEMICO-BIOLOGICAL INTERACTIONS
CHILD DEV	0009-3920	SSCI
CHILD MALTREATMENT	1077-5595	SSCI
CHILD PSYCHIAT HUM D	0009-398X	SSCI
CHILDHOOD	0907-5682	SSCI
CHILD SOC	0951-0605	SSCI
CHINA WORLD ECON	1671-2234	SSCI
CHINA ECON REV	1043-951X	SSCI
CHINA J	1324-9347	SSCI
CHINA QUART	0305-7410	SSCI
CHINA REV	1680-2012	SSCI
CHRONOBIOLOGY INTERNATIONAL	0742-0528	SCIE	CHRONOBIOLOGY INTERNATIONAL
CINEMA JOURNAL	0009-7101	AHCI
CITIES	0264-2751	SSCI
CLASSICAL QUARTERLY	0009-8388	AHCI
CLIN CHILD FAM PSYCH	1096-4037	SSCI
CLIN PSYCHOL PSYCHOT	1063-3995	SSCI
CLOTH TEXT RES J	0887-302X	SSCI
COAST MANAGE	0892-0753	SSCI
COGNITION	0010-0277	SSCI
COGN BEHAV PRACT	1077-7229	SSCI
COGNITIVE DEV	0885-2014	SSCI
COGNITIVE PSYCHOL	0010-0285	SSCI
COGNITIVE SCI	0364-0213	SSCI
COGNITIVE THER RES	0147-5916	SSCI
COLUMBIA LAW REV	0010-1958	SSCI
COMMUN MONOGR	0363-7751	SSCI
COMMUN RES	0093-6502	SSCI
COMP POLIT STUD	0010-4140	SSCI
COMP POLIT	0010-4159	SSCI
COMP STUD SOC HIST	0010-4175	SSCI
COMPUT ENVIRON URBAN	0198-9715	SSCI
CONCURRENT ENGINEERING-RESEARCH AND APPLICATIONS	1063-293X	SCIE	CONCURRENT ENGINEERING-RESEARCH AND APPLICATIONS
CONFIGURATIONS	1063-1801	AHCI
CONSTRAINTS	1383-7133	SCIE	CONSTRAINTS
CONTEMP ACCOUNT RES	0823-9150	SSCI
CONTEMP ECON POLICY	1074-3529	SSCI
CONTEMPORARY LITERATURE	0010-7484	AHCI
CONTINENTAL PHILOSOPHY REVIEW	1387-2842	AHCI
CONTINENTAL SHELF RESEARCH	0278-4343	SCIE	CONTINENTAL SHELF RESEARCH
COOP CONFL	0010-8367	SSCI
CORNELL HOSP Q	1938-9655	SSCI
CORNELL LAW REV	0010-8847	SSCI
CORP GOV-OXFORD	0964-8410	SSCI
CREATIVITY RES J	1040-0419	SSCI
CRIME DELINQUENCY	0011-1287	SSCI
CRIMINOLOGY	0011-1384	SSCI
CRISIS	0227-5910	SSCI
CRIT ASIAN STUD	1467-2715	SSCI
CROSS-CULT RES	1069-3971	SSCI
CULT DIVERS ETHN MIN	1099-9809	SSCI
CULT PSYCHOL	1354-067X	SSCI
CURR ANTHROPOL	0011-3204	SSCI
CURR DIR PSYCHOL SCI	0963-7214	SSCI
CURR HIST	0011-3530	SSCI
CURR PSYCHOL	1046-1310	SSCI
CURR SOCIOL	0011-3921	SSCI
DAEDALUS	0011-5266	AHCI
DATA BASE ADV INF SY	0095-0033	SSCI
DEATH STUD	0748-1187	SSCI
DECISION SCI	0011-7315	SSCI
DECISION SUPPORT SYSTEMS	0167-9236	SCIE	DECISION SUPPORT SYSTEMS
DEMOGRAPHY	0070-3370	SSCI
NERVENARZT	0028-2804	SCIE	NERVENARZT
UNFALLCHIRURG	0177-5537	SCIE	UNFALLCHIRURG
UROLOGE	0340-2592	SCIE	UROLOGE
DESIGN ISSUES	0747-9360	AHCI
DEV CHANGE	0012-155X	SSCI
DEV PSYCHOPATHOL	0954-5794	SSCI
DEV POLICY REV	0950-6764	SSCI
DEV NEUROPSYCHOL	8756-5641	SSCI
DEV PSYCHOL	0012-1649	SSCI
DEV REV	0273-2297	SSCI
DEVELOPMENTAL SCI	1363-755X	SSCI
DIALOGUE-CANADIAN PHILOSOPHICAL REVIEW	0012-2173	AHCI
PHARMAZIE	0031-7144	SCIE	PHARMAZIE
DISCOURSE SOC	0957-9265	SSCI
DISCOURSE PROCESS	0163-853X	SSCI
DISCOURSE STUD	1461-4456	SSCI
DISCRETE & COMPUTATIONAL GEOMETRY	0179-5376	SCIE	DISCRETE & COMPUTATIONAL GEOMETRY
DIVERSITY AND DISTRIBUTIONS	1366-9516	SCIE	DIVERSITY AND DISTRIBUTIONS
DREAMING	1053-0797	SSCI
DUKE LAW J	0012-7086	SSCI		OAJ	Duke University School of Law
EASTERN EUR ECON	0012-8775	SSCI
ECOL ECON	0921-8009	SSCI
ECONOMET REV	0747-4938	SSCI
ECONOMET THEOR	0266-4666	SSCI
ECONOMETRICA	0012-9682	SSCI
ECONOMET J	1368-4221	SSCI
ECON IND DEMOCRACY	0143-831X	SSCI
ECON DEV CULT CHANGE	0013-0079	SSCI
ECON DEV Q	0891-2424	SSCI
ECON GEOGR	0013-0095	SSCI
ECONOMIC GEOLOGY	0361-0128	SCIE	ECONOMIC GEOLOGY
ECON INQ	0095-2583	SSCI
ECON J	0013-0133	SSCI
ECON MODEL	0264-9993	SSCI
ECON POLICY	0266-4658	SSCI
ECON SYST RES	0953-5314	SSCI
ECON THEOR	0938-2259	SSCI
ECONOMICA	0013-0427	SSCI
ECON HUM BIOL	1570-677X	SSCI
ECON PHILOS	0266-2671	SSCI
ECON LETT	0165-1765	SSCI
ECON EDUC REV	0272-7757	SSCI
ECON TRANSIT	0967-0750	SSCI
ECON SOC	0308-5147	SSCI
EDUC PSYCHOL MEAS	0013-1644	SSCI
EDUC GERONTOL	0360-1277	SSCI
EDUC PSYCHOL-US	0046-1520	SSCI
EIGHTEENTH CENTURY-THEORY AND INTERPRETATION	0193-5380	AHCI
ELECT STUD	0261-3794	SSCI
ELECTRON COMMER RES	1389-5753	SSCI
ELECTRON COMMER R A	1567-4223	SSCI
ELECTRON LIBR	0264-0473	SSCI
ELECTRON MARK	1019-6781	SSCI
EMOTION	1528-3542	SSCI
EMPIR ECON	0377-7332	SSCI
ENERGY CONVERSION AND MANAGEMENT	0196-8904	SCIE	ENERGY CONVERSION AND MANAGEMENT
ENERG ECON	0140-9883	SSCI
ENERG J	0195-6574	SSCI
ENERG POLICY	0301-4215	SSCI
ENTREP REGION DEV	0898-5626	SSCI
ENVIRON BEHAV	0013-9165	SSCI
ENVIRON DEV ECON	1355-770X	SSCI
ENVIRON PLANN A	0308-518X	SSCI
ENVIRON PLANN C	0263-774X	SSCI
ENVIRON RESOUR ECON	0924-6460	SSCI
ENVIRONMENTAL TOXICOLOGY AND PHARMACOLOGY	1382-6689	SCIE	ENVIRONMENTAL TOXICOLOGY AND PHARMACOLOGY
ERGONOMICS	0014-0139	SSCI
ERKENNTNIS	0165-0106	AHCI
ETHNIC RACIAL STUD	0141-9870	SSCI
ETHNOGRAPHY	1466-1381	SSCI
ETHNOLOGY	0014-1828	SSCI
ETHOS	0091-2131	SSCI
EUR ECON REV	0014-2921	SSCI
EUR FINANC MANAG	1354-7798	SSCI
EUR J MARKETING	0309-0566	SSCI
EUROPEAN JOURNAL OF OPERATIONAL RESEARCH	0377-2217	SCIE	EUROPEAN JOURNAL OF OPERATIONAL RESEARCH
EUR J PERSONALITY	0890-2070	SSCI
EUR J POLIT RES	0304-4130	SSCI
EUR J SOC PSYCHOL	0046-2772	SSCI
EUR PLAN STUD	0965-4313	SSCI
EUR PSYCHOL	1016-9040	SSCI
EUR REV AGRIC ECON	0165-1587	SSCI
EUR REV ECON HIST	1361-4916	SSCI
EUR SOCIOL REV	0266-7215	SSCI
EUR URBAN REG STUD	0969-7764	SSCI
EUROPE-ASIA STUD	0966-8136	SSCI
EVALUATION REV	0193-841X	SSCI
EXP PSYCHOL	1618-3169	SSCI
EXPLOR ECON HIST	0014-4983	SSCI
FAM SOC	1044-3894	SSCI
FAM PROCESS	0014-7370	SSCI
FAM RELAT	0197-6664	SSCI
FED RESERVE BANK ST	0014-9187	SSCI
FINANC STOCH	0949-2984	SSCI
FINANC ANAL J	0015-198X	SSCI
FINANC MANAGE	0046-3892	SSCI
FITOTERAPIA	0367-326X	SCIE	FITOTERAPIA
FOLIA BIOLOGICA-KRAKOW	0015-5497	SCIE	FOLIA BIOLOGICA-KRAKOW
WHO TECHNICAL REPORT SERIES	0512-3054	SCIE	WHO TECHNICAL REPORT SERIES
FORENSIC SCIENCE INTERNATIONAL	0379-0738	SCIE	FORENSIC SCIENCE INTERNATIONAL
FORENSIC SCIENCE INTERNATIONAL-GENETICS	1872-4973	SCIE	FORENSIC SCIENCE INTERNATIONAL-GENETICS
FOREST POLICY AND ECONOMICS	1389-9341	SCIE	FOREST POLICY AND ECONOMICS
FORTUNE	0015-8259	SSCI
FUTURES	0016-3287	SSCI
GAME ECON BEHAV	0899-8256	SSCI
GENDER SOC	0891-2432	SSCI
GEOGR ANAL	0016-7363	SSCI
GEOGR REV	0016-7428	SSCI
GEOGRAPHY	0016-7487	SSCI
GEOINFORMATICA	1384-6175	SCIE	GEOINFORMATICA
GLOBAL ECON REV	1226-508X	SSCI
GLOBAL NETW	1470-2266	SSCI
GOVERNANCE	0952-1895	SSCI
GOV OPPOS	0017-257X	SSCI
GOV INFORM Q	0740-624X	SSCI
GROUP ORGAN MANAGE	1059-6011	SSCI
GROUP DECIS NEGOT	0926-2644	SSCI
GROUP DYN-THEOR RES	1089-2699	SSCI
GROWTH CHANGE	0017-4815	SSCI
HEALTH CARE WOMEN IN	0739-9332	SSCI
HEALTH CARE MANAGE R	0361-6274	SSCI
HEALTH COMMUN	1041-0236	SSCI
HEALTH ECON	1057-9230	SSCI
HEALTH INFO LIBR J	1471-1834	SSCI
HEALTH PSYCHOL	0278-6133	SSCI
HERMATHENA	0018-0750	AHCI
HISPANIA-A JOURNAL DEVOTED TO THE TEACHING OF SPANISH AND PORTUGUESE	0018-2133	AHCI
HISTORY TODAY	0018-2753	AHCI
HITOTSUB J ECON	0018-280X	SSCI
HOMO	0018-442X	SSCI
HOUS POLICY DEBATE	1051-1482	SSCI
HUM COMMUN RES	0360-3989	SSCI
HUM DEV	0018-716X	SSCI
HUM FACTORS	0018-7208	SSCI
HUM ORGAN	0018-7259	SSCI
HUM PERFORM	0895-9285	SSCI
HUM RELAT	0018-7267	SSCI
HUM RESOUR DEV Q	1044-8004	SSCI
HUM RESOUR MANAGE-US	0090-4848	SSCI
HUM RESOUR MANAGE R	1053-4822	SSCI
HUM RIGHTS QUART	0275-0392	SSCI
HUM STUD	0163-8548	SSCI
HUSSERL STUDIES	0167-9848	AHCI
IDS BULL-I DEV STUD	0265-5012	SSCI
IEEE COMMUNICATIONS MAGAZINE	0163-6804	SCIE	IEEE COMMUNICATIONS MAGAZINE
IEEE TRANSACTIONS ON COMMUNICATIONS	0090-6778	SCIE	IEEE TRANSACTIONS ON COMMUNICATIONS
IEEE T ENG MANAGE	0018-9391	SSCI
IEEE TRANSACTIONS ON KNOWLEDGE AND DATA ENGINEERING	1041-4347	SCIE	IEEE TRANSACTIONS ON KNOWLEDGE AND DATA ENGINEERING
PONTE	0032-423X	AHCI
IND LABOR RELAT REV	0019-7939	SSCI
IND CORP CHANGE	0960-6491	SSCI
INDUSTRIAL MANAGEMENT & DATA SYSTEMS	0263-5577	SCIE	INDUSTRIAL MANAGEMENT & DATA SYSTEMS
IND MARKET MANAG	0019-8501	SSCI
IND RELAT	0019-8676	SSCI
IND INNOV	1366-2716	SSCI
INFANCY	1525-0008	SSCI
INFANT CHILD DEV	1522-7227	SSCI
INFANT MENT HEALTH J	0163-9641	SSCI
INFORM MANAGE-AMSTER	0378-7206	SSCI
INF ECON POLICY	0167-6245	SSCI
INFORM SOC	0197-2243	SSCI
INFORMATION SYSTEMS	0306-4379	SCIE	INFORMATION SYSTEMS
INFORMATION SYSTEMS FRONTIERS	1387-3326	SCIE	INFORMATION SYSTEMS FRONTIERS
INFORM SYST J	1350-1917	SSCI
INFORMATION SYSTEMS MANAGEMENT	1058-0530	SCIE	INFORMATION SYSTEMS MANAGEMENT
INFORM SYST RES	1047-7047	SSCI
INSUR MATH ECON	0167-6687	SSCI
INTELLIGENCE	0160-2896	SSCI
INT BUS REV	0969-5931	SSCI
INT ECON REV	0020-6598	SSCI
INT J ADVERT	0265-0487	SSCI
INTERNATIONAL JOURNAL OF APPLIED EARTH OBSERVATION AND GEOINFORMATION	0303-2434	SCIE	INTERNATIONAL JOURNAL OF APPLIED EARTH OBSERVATION AND GEOINFORMATION
INT J BEHAV DEV	0165-0254	SSCI
INTERNATIONAL JOURNAL OF BIOCHEMISTRY & CELL BIOLOGY	1357-2725	SCIE	INTERNATIONAL JOURNAL OF BIOCHEMISTRY & CELL BIOLOGY
INT J COMP SOCIOL	0020-7152	SSCI
INT J CONFL MANAGE	1044-4068	SSCI
INT J CONSUM STUD	1470-6423	SSCI
INT J CULTURAL STUD	1367-8779	SSCI
INT J ELECTRON COMM	1086-4415	SSCI
INT J FINANC ECON	1076-9307	SSCI
INT J FORECASTING	0169-2070	SSCI
INT J GAME THEORY	0020-7276	SSCI
INTERNATIONAL JOURNAL OF GERONTOLOGY	1873-9598	SCIE	INTERNATIONAL JOURNAL OF GERONTOLOGY
INT J HEALTH CARE FI	1389-6563	SSCI
INT J HEALTH PLAN M	0749-6753	SSCI
INT J HOSP MANAG	0278-4319	SSCI
INT J HUM RESOUR MAN	0958-5192	SSCI
INT J INFORM MANAGE	0268-4012	SSCI
INTERNATIONAL JOURNAL OF INFORMATION SECURITY	1615-5262	SCIE	INTERNATIONAL JOURNAL OF INFORMATION SECURITY
INT J INTERCULT REL	0147-1767	SSCI
INTERNATIONAL JOURNAL OF LEGAL MEDICINE	0937-9827	SCIE	INTERNATIONAL JOURNAL OF LEGAL MEDICINE
INT J MANPOWER	0143-7720	SSCI
INT J OFFENDER THER	0306-624X	SSCI
INT J OPER PROD MAN	0144-3577	SSCI
INTERNATIONAL JOURNAL OF PRODUCTION ECONOMICS	0925-5273	SCIE	INTERNATIONAL JOURNAL OF PRODUCTION ECONOMICS
INTERNATIONAL JOURNAL OF PRODUCTION RESEARCH	0020-7543	SCIE	INTERNATIONAL JOURNAL OF PRODUCTION RESEARCH
INT J PROJ MANAG	0263-7863	SSCI
INT J PSYCHOL	0020-7594	SSCI
INT J PUBLIC OPIN R	0954-2892	SSCI
INTERNATIONAL JOURNAL OF REMOTE SENSING	0143-1161	SCIE	INTERNATIONAL JOURNAL OF REMOTE SENSING
INT J SELECT ASSESS	0965-075X	SSCI
INT J SOC WELF	1369-6866	SSCI
INTERNATIONAL JOURNAL OF SOFTWARE ENGINEERING AND KNOWLEDGE ENGINEERING	0218-1940	SCIE	INTERNATIONAL JOURNAL OF SOFTWARE ENGINEERING AND KNOWLEDGE ENGINEERING
INT J SPORT PSYCHOL	0047-0767	SSCI
INT J STRATEG PROP M	1648-715X	SSCI
INT J TECHNOL MANAGE	0267-5730	SSCI
INT J TRANSP ECON	0391-8440	SSCI
INT J URBAN REGIONAL	0309-1317	SSCI
INT LABOUR REV	0020-7780	SSCI
INT MARKET REV	0265-1335	SSCI
INT ORGAN	0020-8183	SSCI
INT POLITICS	1384-5748	SSCI
INT PUBLIC MANAG J	1096-7494	SSCI
INT REGIONAL SCI REV	0160-0176	SSCI
INT REV ADM SCI	0020-8523	SSCI
INT REV LAW ECON	0144-8188	SSCI
INT SECURITY	0162-2889	SSCI
INT SOC WORK	0020-8728	SSCI
INT SOCIOL	0268-5809	SSCI
INT TAX PUBLIC FINAN	0927-5940	SSCI
INTERNET RES	1066-2243	SSCI
IRONMAKING & STEELMAKING	0301-9233	SCIE	IRONMAKING & STEELMAKING
ISSUES STUD	1013-2511	SSCI
IUBMB LIFE	1521-6543	SCIE	IUBMB LIFE
JPN WORLD ECON	0922-1425	SSCI
JPN ECON REV	1352-4739	SSCI
JAVNOST-PUBLIC	1318-3222	SSCI
J SCI STUD RELIG	0021-8294	SSCI
J ABNORM CHILD PSYCH	0091-0627	SSCI
J ABNORM PSYCHOL	0021-843X	SSCI
J ACAD LIBR	0099-1333	SSCI
J ACCOUNT ECON	0165-4101	SSCI
J ACCOUNT PUBLIC POL	0278-4254	SSCI
J ACCOUNT RES	0021-8456	SSCI
J ADOLESCENCE	0140-1971	SSCI
J ADOLESCENT RES	0743-5584	SSCI
J ADULT DEV	1068-0667	SSCI
J ADVERTISING	0091-3367	SSCI
J ADVERTISING RES	0021-8499	SSCI
J AFR ECON	0963-8024	SSCI
J AFR HIST	0021-8537	SSCI
J AGING SOC POLICY	0895-9420	SSCI
J AGR ECON	0021-857X	SSCI
JOURNAL OF AMERICAN STUDIES	0021-8758	AHCI
J ANTHROPOL ARCHAEOL	0278-4165	SSCI
J ANTHROPOL RES	0091-7710	SSCI
J APPL BEHAV ANAL	0021-8855	SSCI
J APPL ECONOMET	0883-7252	SSCI
JOURNAL OF APPLIED PHYCOLOGY	0921-8971	SCIE	JOURNAL OF APPLIED PHYCOLOGY
J APPL SOC PSYCHOL	0021-9029	SSCI
J APPL SPORT PSYCHOL	1041-3200	SSCI
J ARCHAEOL SCI	0305-4403	SSCI
J AUTISM DEV DISORD	0162-3257	SSCI
J BANK FINANC	0378-4266	SSCI
J BUS ECON STAT	0735-0015	SSCI
J BUS PSYCHOL	0889-3268	SSCI
J BUS ETHICS	0167-4544	SSCI
J BUS FINAN ACCOUNT	0306-686X	SSCI
J BUS RES	0148-2963	SSCI
J BUS VENTURING	0883-9026	SSCI
J BUS-BUS MARK	1051-712X	SSCI
J CAREER ASSESSMENT	1069-0727	SSCI
J CAREER DEV	0894-8453	SSCI
J CHILD ADOLES SUBST	1067-828X	SSCI
J CHILD LANG	0305-0009	SSCI
J CHILD PSYCHOL PSYC	0021-9630	SSCI
JOURNAL OF CHINESE PHILOSOPHY	0301-8121	AHCI
J CLIN EXP NEUROPSYC	1380-3395	SSCI
J CLIN CHILD ADOLESC	1537-4416	SSCI
J CLIN PSYCHOL	0021-9762	SSCI
J CLIN PSYCHOL MED S	1068-9583	SSCI
J COLL STUDENT DEV	0897-5264	SSCI
JCMS-J COMMON MARK S	0021-9886	SSCI
J COMMUNITY PSYCHOL	0090-4392	SSCI
J COMP ECON	0147-5967	SSCI
J COMP FAM STUD	0047-2328	SSCI
J COMP PSYCHOL	0735-7036	SSCI
J COMPET LAW ECON	1744-6414	SSCI
JOURNAL OF CONSTRUCTION ENGINEERING AND MANAGEMENT-ASCE	0733-9364	SCIE	JOURNAL OF CONSTRUCTION ENGINEERING AND MANAGEMENT-ASCE
JOURNAL OF CONSTRUCTIONAL STEEL RESEARCH	0143-974X	SCIE	JOURNAL OF CONSTRUCTIONAL STEEL RESEARCH
J CONSULT CLIN PSYCH	0022-006X	SSCI
J CONTEMP ASIA	0047-2336	SSCI
J CONTEMP CHINA	1067-0564	SSCI
J CONTEMP HIST	0022-0094	SSCI
J CORP FINANC	0929-1199	SSCI
J COUNS DEV	0748-9633	SSCI
J COUNS PSYCHOL	0022-0167	SSCI
J CREATIVE BEHAV	0022-0175	SSCI
J CRIM JUST	0047-2352	SSCI
J CROSS CULT PSYCHOL	0022-0221	SSCI
J CULT ECON	0885-2545	SSCI
JOURNAL OF CULTURAL HERITAGE	1296-2074	SCIE	JOURNAL OF CULTURAL HERITAGE
J DEMOCR	1045-5736	SSCI
J DEV ECON	0304-3878	SSCI
J DEV BEHAV PEDIATR	0196-206X	SSCI
J DEV PHYS DISABIL	1056-263X	SSCI
J EAST ASIAN LINGUIS	0925-8558	SSCI
J EAST ASIAN STUD	1598-2408	SSCI
J ECON BEHAV ORGAN	0167-2681	SSCI
J ECON DYN CONTROL	0165-1889	SSCI
J ECON GEOGR	1468-2702	SSCI
J ECON ISSUES	0021-3624	SSCI
J ECON LIT	0022-0515	SSCI
J ECON PSYCHOL	0167-4870	SSCI
J ECON SURV	0950-0804	SSCI
J ECON THEORY	0022-0531	SSCI
J ECON MANAGE STRAT	1058-6407	SSCI
J ECON	0931-8658	SSCI
J EDUC MEAS	0022-0655	SSCI
J EDUC PSYCHOL	0022-0663	SSCI
J EMOT BEHAV DISORD	1063-4266	SSCI
J EMPIR FINANC	0927-5398	SSCI
J EMPLOYMENT COUNS	0022-0787	SSCI
J ENVIRON ECON MANAG	0095-0696	SSCI
J ENVIRON PLANN MAN	0964-0568	SSCI
J ENVIRON PSYCHOL	0272-4944	SSCI
J ETHN MIGR STUD	1369-183X	SSCI
J EUR SOC POLICY	0958-9287	SSCI
JOURNAL OF EUROPEAN STUDIES	0047-2441	AHCI
JOURNAL OF EVOLUTION EQUATIONS	1424-3199	SCIE	JOURNAL OF EVOLUTION EQUATIONS
J EVOL ECON	0936-9937	SSCI
J EXP PSYCHOL HUMAN	0096-1523	SSCI
J EXP PSYCHOL LEARN	0278-7393	SSCI
J EXP SOC PSYCHOL	0022-1031	SSCI
J FAM HIST	0363-1990	SSCI
J FAM ISSUES	0192-513X	SSCI
J FAM PSYCHOL	0893-3200	SSCI
J FAM VIOLENCE	0885-7482	SSCI
J FINANC QUANT ANAL	0022-1090	SSCI
J FINANC ECONOMET	1479-8409	SSCI
J FINANC ECON	0304-405X	SSCI
J FINANC INTERMED	1042-9573	SSCI
J FINANC MARK	1386-4181	SSCI
J FORECASTING	0277-6693	SSCI
J FUTURES MARKETS	0270-7314	SSCI
J GAMBL STUD	1050-5350	SSCI
J GENDER STUD	0958-9236	SSCI
J GEOGR HIGHER EDUC	0309-8265	SSCI
JOURNAL OF GINSENG RESEARCH	1226-8453	SCIE	JOURNAL OF GINSENG RESEARCH	OAJ	Korean Society of Ginseng
J GLOB INF MANAG	1062-7375	SSCI
JOURNAL OF GLOBAL OPTIMIZATION	0925-5001	SCIE	JOURNAL OF GLOBAL OPTIMIZATION
J HAPPINESS STUD	1389-4978	SSCI
J HEALTH SOC BEHAV	0022-1465	SSCI
J HEALTH CARE POOR U	1049-2089	SSCI
J HEALTH COMMUN	1081-0730	SSCI
J HEALTH ECON	0167-6296	SSCI
J HEALTH POLIT POLIC	0361-6878	SSCI
J HEALTH PSYCHOL	1359-1053	SSCI
J HIST GEOGR	0305-7488	SSCI
J HOUS ECON	1051-1377	SSCI
J HUM EVOL	0047-2484	SSCI
J HUMANIST PSYCHOL	0022-1678	SSCI
AIAA JOURNAL	0001-1452	SCIE	AIAA JOURNAL
AICHE JOURNAL	0001-1541	SCIE	AICHE JOURNAL
MATHEMATICAL NOTES	0001-4346	SCIE	MATHEMATICAL NOTES
ACTA CHIRURGICA BELGICA	0001-5458	SCIE	ACTA CHIRURGICA BELGICA
ACTA CLINICA BELGICA	0001-5512	SCIE	ACTA CLINICA BELGICA
ACTA GASTRO-ENTEROLOGICA BELGICA	0001-5644	SCIE	ACTA GASTRO-ENTEROLOGICA BELGICA
ACTA ORTHOPAEDICA BELGICA	0001-6462	SCIE	ACTA ORTHOPAEDICA BELGICA
B-ENT	0001-6497	SCIE	B-ENT
JOURNAL OF WATER SUPPLY RESEARCH AND TECHNOLOGY-AQUA	0003-7214	SCIE	JOURNAL OF WATER SUPPLY RESEARCH AND TECHNOLOGY-AQUA
ARCH GEN PSYCHIAT	0003-990X	SSCI
ARTHRITIS AND RHEUMATISM	0004-3591	SCIE	ARTHRITIS AND RHEUMATISM
ARZNEIMITTELFORSCHUNG-DRUG RESEARCH	0004-4172	SCIE	ARZNEIMITTELFORSCHUNG-DRUG RESEARCH
GENETICS RESEARCH	0016-6723	SCIE	GENETICS RESEARCH
GOLD BULLETIN	0017-1557	SCIE	GOLD BULLETIN	OAJ	Springer
EUROPEAN JOURNAL OF WOOD AND WOOD PRODUCTS	0018-3768	SCIE	EUROPEAN JOURNAL OF WOOD AND WOOD PRODUCTS
MOKUZAI GAKKAISHI	0021-4795	SCIE	MOKUZAI GAKKAISHI
JAPANESE JOURNAL OF APPLIED PHYSICS	0021-4922	SCIE	JAPANESE JOURNAL OF APPLIED PHYSICS
JOURNAL OF APICULTURAL RESEARCH	0021-8839	SCIE	JOURNAL OF APICULTURAL RESEARCH
MICROSCOPY	0022-0744	SCIE	MICROSCOPY
MICROELECTRONICS JOURNAL	0026-2692	SCIE	MICROELECTRONICS JOURNAL
MUTATION RESEARCH-FUNDAMENTAL AND MOLECULAR MECHANISMS OF MUTAGENESIS	0027-5107	SCIE	MUTATION RESEARCH-FUNDAMENTAL AND MOLECULAR MECHANISMS OF MUTAGENESIS
PANMINERVA MEDICA	0031-0808	SCIE	PANMINERVA MEDICA
REVUE DE STOMATOLOGIE ET DE CHIRURGIE MAXILLO-FACIALE	0035-1768	SCIE	REVUE DE STOMATOLOGIE ET DE CHIRURGIE MAXILLO-FACIALE
JOURNAL WATER POLLUTION CONTROL FEDERATION	0043-1303	SCIE	JOURNAL WATER POLLUTION CONTROL FEDERATION
ABSTRACTS OF PAPERS OF THE AMERICAN CHEMICAL SOCIETY	0065-7727	SCIE	ABSTRACTS OF PAPERS OF THE AMERICAN CHEMICAL SOCIETY
INTERNATIONAL REVIEW OF CYTOLOGY-A SURVEY OF CELL BIOLOGY	0074-7696	SCIE	INTERNATIONAL REVIEW OF CYTOLOGY-A SURVEY OF CELL BIOLOGY
PATHOLOGY ANNUAL	0079-0184	SCIE	PATHOLOGY ANNUAL
PROGRESS IN NUCLEIC ACID RESEARCH AND MOLECULAR BIOLOGY	0079-6603	SCIE	PROGRESS IN NUCLEIC ACID RESEARCH AND MOLECULAR BIOLOGY
INTERNATIONAL JOURNAL OF POLYMERIC MATERIALS AND POLYMERIC BIOMATERIALS	0091-4037	SCIE	INTERNATIONAL JOURNAL OF POLYMERIC MATERIALS AND POLYMERIC BIOMATERIALS
ACM TRANSACTIONS ON MATHEMATICAL SOFTWARE	0098-3500	SCIE	ACM TRANSACTIONS ON MATHEMATICAL SOFTWARE
ACTA CRYSTALLOGRAPHICA SECTION B-STRUCTURAL SCIENCE	0108-7681	SCIE	ACTA CRYSTALLOGRAPHICA SECTION B-STRUCTURAL SCIENCE
ADVANCES IN MICROBIAL ECOLOGY	0147-4863	SCIE	ADVANCES IN MICROBIAL ECOLOGY
AAPG BULLETIN	0149-1423	SCIE	AAPG BULLETIN
AGE	0161-9152	SCIE	AGE
ACM TRANSACTIONS ON PROGRAMMING LANGUAGES AND SYSTEMS	0164-0925	SCIE	ACM TRANSACTIONS ON PROGRAMMING LANGUAGES AND SYSTEMS
JOURNAL OF EARTH SYSTEM SCIENCE	0253-4126	SCIE	JOURNAL OF EARTH SYSTEM SCIENCE	OAJ	Indian Academy of Sciences
INTERNATIONAL JOURNAL OF REFRACTORY METALS & HARD MATERIALS	0263-4368	SCIE	INTERNATIONAL JOURNAL OF REFRACTORY METALS & HARD MATERIALS
JOURNAL OF NEURAL TRANSMISSION	0300-9564	SCIE	JOURNAL OF NEURAL TRANSMISSION
LATIN AMERICAN JOURNAL OF PHARMACY	0326-2383	SCIE	LATIN AMERICAN JOURNAL OF PHARMACY
SCIENCE AND ENGINEERING OF COMPOSITE MATERIALS	0334-181X	SCIE	SCIENCE AND ENGINEERING OF COMPOSITE MATERIALS
ACM COMPUTING SURVEYS	0360-0300	SCIE	ACM COMPUTING SURVEYS
ACM SIGPLAN NOTICES	0362-1340	SCIE	ACM SIGPLAN NOTICES
ACM TRANSACTIONS ON DATABASE SYSTEMS	0362-5915	SCIE	ACM TRANSACTIONS ON DATABASE SYSTEMS
JOURNAL OF INDIAN PHILOSOPHY	0022-1791	AHCI
ONKOLOGIE	0378-584X	SCIE	ONKOLOGIE
INDIAN JOURNAL OF GEO-MARINE SCIENCES	0379-5136	SCIE	INDIAN JOURNAL OF GEO-MARINE SCIENCES	OAJ	NISCAIR
LANDBAUFORSCHUNG	0458-6859	SCIE	LANDBAUFORSCHUNG
NEUROLOGIA MEDICO-CHIRURGICA	0470-8105	SCIE	NEUROLOGIA MEDICO-CHIRURGICA	OAJ	The Japan Neurosurgical Society
COASTAL ENGINEERING JOURNAL	0578-5634	SCIE	COASTAL ENGINEERING JOURNAL
FORTSCHRITTE DER NEUROLOGIE PSYCHIATRIE	0720-4299	SCIE	FORTSCHRITTE DER NEUROLOGIE PSYCHIATRIE
ACM TRANSACTIONS ON GRAPHICS	0730-0301	SCIE	ACM TRANSACTIONS ON GRAPHICS
TAPPI JOURNAL	0734-1415	SCIE	TAPPI JOURNAL
ACM TRANSACTIONS ON COMPUTER SYSTEMS	0734-2071	SCIE	ACM TRANSACTIONS ON COMPUTER SYSTEMS
JOURNAL OF VACUUM SCIENCE & TECHNOLOGY A	0734-2101	SCIE	JOURNAL OF VACUUM SCIENCE & TECHNOLOGY A
NOISE CONTROL ENGINEERING JOURNAL	0736-2501	SCIE	NOISE CONTROL ENGINEERING JOURNAL
AI MAGAZINE	0738-4602	SCIE	AI MAGAZINE
IEEE DESIGN & TEST OF COMPUTERS	0740-7475	SCIE	IEEE DESIGN & TEST OF COMPUTERS
NEURAL PLASTICITY	0792-8483	SCIE	NEURAL PLASTICITY	OAJ	Hindawi Publishing Corporation
AUST J ADV NURS	0813-0531	SSCI
ACI STRUCTURAL JOURNAL	0889-3241	SCIE	ACI STRUCTURAL JOURNAL
ACI MATERIALS JOURNAL	0889-325X	SCIE	ACI MATERIALS JOURNAL
CLINICS IN PODIATRIC MEDICINE AND SURGERY	0891-8422	SCIE	CLINICS IN PODIATRIC MEDICINE AND SURGERY
ACTA METEOROLOGICA SINICA	0894-0525	SCIE	ACTA METEOROLOGICA SINICA
APMIS	0903-4641	SCIE	APMIS
MATERIALS SCIENCE AND ENGINEERING B-ADVANCED FUNCTIONAL SOLID-STATE MATERIALS	0921-5107	SCIE	MATERIALS SCIENCE AND ENGINEERING B-ADVANCED FUNCTIONAL SOLID-STATE MATERIALS
AI COMMUNICATIONS	0921-7126	SCIE	AI COMMUNICATIONS
JOURNAL OF INCLUSION PHENOMENA AND MACROCYCLIC CHEMISTRY	0923-0750	SCIE	JOURNAL OF INCLUSION PHENOMENA AND MACROCYCLIC CHEMISTRY
MATERIALS SCIENCE & ENGINEERING C-MATERIALS FOR BIOLOGICAL APPLICATIONS	0928-4931	SCIE	MATERIALS SCIENCE & ENGINEERING C-MATERIALS FOR BIOLOGICAL APPLICATIONS
ANASTHESIOLOGIE INTENSIVMEDIZIN NOTFALLMEDIZIN SCHMERZTHERAPIE	0939-2661	SCIE	ANASTHESIOLOGIE INTENSIVMEDIZIN NOTFALLMEDIZIN SCHMERZTHERAPIE
EUROPEAN JOURNAL OF MEDICAL RESEARCH	0949-2321	SCIE	EUROPEAN JOURNAL OF MEDICAL RESEARCH	OAJ	BioMed Central
POLYMER SCIENCE SERIES A	0965-545X	SCIE	POLYMER SCIENCE SERIES A
JOURNAL OF NATURAL GAS CHEMISTRY	1003-9953	SCIE	JOURNAL OF NATURAL GAS CHEMISTRY
KUWAIT JOURNAL OF SCIENCE & ENGINEERING	1024-8684	SCIE	KUWAIT JOURNAL OF SCIENCE & ENGINEERING
J AM ACAD NURSE PRAC	1041-2972	SSCI
CYTOKINE	1043-4666	SCIE	CYTOKINE
ACM TRANSACTIONS ON INFORMATION SYSTEMS	1046-8188	SCIE	ACM TRANSACTIONS ON INFORMATION SYSTEMS
ACM TRANSACTIONS ON MODELING AND COMPUTER SIMULATION	1049-3301	SCIE	ACM TRANSACTIONS ON MODELING AND COMPUTER SIMULATION
ACM TRANSACTIONS ON SOFTWARE ENGINEERING AND METHODOLOGY	1049-331X	SCIE	ACM TRANSACTIONS ON SOFTWARE ENGINEERING AND METHODOLOGY
AMERICAN JOURNAL OF HOSPICE & PALLIATIVE MEDICINE	1049-9091	SCIE	AMERICAN JOURNAL OF HOSPICE & PALLIATIVE MEDICINE
JOURNAL OF APPLIED POULTRY RESEARCH	1056-6171	SCIE	JOURNAL OF APPLIED POULTRY RESEARCH
JOURNAL OF AOAC INTERNATIONAL	1060-3271	SCIE	JOURNAL OF AOAC INTERNATIONAL
REVIEWS IN FISHERIES SCIENCE	1064-1262	SCIE	REVIEWS IN FISHERIES SCIENCE
JOURNAL OF OROFACIAL PAIN	1064-6655	SCIE	JOURNAL OF OROFACIAL PAIN
JOURNAL OF VACUUM SCIENCE & TECHNOLOGY B	1071-1023	SCIE	JOURNAL OF VACUUM SCIENCE & TECHNOLOGY B
ACM TRANSACTIONS ON COMPUTER-HUMAN INTERACTION	1073-0516	SCIE	ACM TRANSACTIONS ON COMPUTER-HUMAN INTERACTION
DISCRETE AND CONTINUOUS DYNAMICAL SYSTEMS	1078-0947	SCIE	DISCRETE AND CONTINUOUS DYNAMICAL SYSTEMS
ACM TRANSACTIONS ON DESIGN AUTOMATION OF ELECTRONIC SYSTEMS	1084-4309	SCIE	ACM TRANSACTIONS ON DESIGN AUTOMATION OF ELECTRONIC SYSTEMS
AM J MANAG CARE	1088-0224	SSCI
ACM TRANSACTIONS ON INFORMATION AND SYSTEM SECURITY	1094-9224	SCIE	ACM TRANSACTIONS ON INFORMATION AND SYSTEM SECURITY
JOURNAL OF MUSCULOSKELETAL & NEURONAL INTERACTIONS	1108-7161	SCIE	JOURNAL OF MUSCULOSKELETAL & NEURONAL INTERACTIONS	OAJ	International Society of Musculoskeletal and Neuronal Interactions
EPIDEMIOL PREV	1120-9763	SSCI
KOREA-AUSTRALIA RHEOLOGY JOURNAL	1226-119X	SCIE	KOREA-AUSTRALIA RHEOLOGY JOURNAL
AUSTRALIAN JOURNAL OF ENTOMOLOGY	1326-6756	SCIE	AUSTRALIAN JOURNAL OF ENTOMOLOGY
JOURNAL OF NATURAL MEDICINES	1340-3443	SCIE	JOURNAL OF NATURAL MEDICINES
AUDIOLOGY AND NEURO-OTOLOGY	1420-3030	SCIE	AUDIOLOGY AND NEURO-OTOLOGY
AEU-INTERNATIONAL JOURNAL OF ELECTRONICS AND COMMUNICATIONS	1434-8411	SCIE	AEU-INTERNATIONAL JOURNAL OF ELECTRONICS AND COMMUNICATIONS
ANZ JOURNAL OF SURGERY	1445-1433	SCIE	ANZ JOURNAL OF SURGERY
JOURNAL OF FOOD AGRICULTURE & ENVIRONMENT	1459-0255	SCIE	JOURNAL OF FOOD AGRICULTURE & ENVIRONMENT
BEST PRACTICE & RESEARCH CLINICAL ENDOCRINOLOGY & METABOLISM	1521-690X	SCIE	BEST PRACTICE & RESEARCH CLINICAL ENDOCRINOLOGY & METABOLISM
BEST PRACTICE & RESEARCH IN CLINICAL GASTROENTEROLOGY	1521-6918	SCIE	BEST PRACTICE & RESEARCH IN CLINICAL GASTROENTEROLOGY
BEST PRACTICE & RESEARCH CLINICAL OBSTETRICS & GYNAECOLOGY	1521-6934	SCIE	BEST PRACTICE & RESEARCH CLINICAL OBSTETRICS & GYNAECOLOGY
BEST PRACTICE & RESEARCH IN CLINICAL RHEUMATOLOGY	1521-6942	SCIE	BEST PRACTICE & RESEARCH IN CLINICAL RHEUMATOLOGY
AAPS PHARMSCITECH	1530-9932	SCIE	AAPS PHARMSCITECH
AATCC REVIEW	1532-8813	SCIE	AATCC REVIEW
ACM TRANSACTIONS ON INTERNET TECHNOLOGY	1533-5399	SCIE	ACM TRANSACTIONS ON INTERNET TECHNOLOGY
ALCOHOL RES HEALTH	1535-7414	SSCI		OAJ	U.S. National Institute on Alcohol Abuse and Alcoholism
ACM TRANSACTIONS ON EMBEDDED COMPUTING SYSTEMS	1539-9087	SCIE	ACM TRANSACTIONS ON EMBEDDED COMPUTING SYSTEMS
ACM TRANSACTIONS ON APPLIED PERCEPTION	1544-3558	SCIE	ACM TRANSACTIONS ON APPLIED PERCEPTION
ACM TRANSACTIONS ON ARCHITECTURE AND CODE OPTIMIZATION	1544-3566	SCIE	ACM TRANSACTIONS ON ARCHITECTURE AND CODE OPTIMIZATION
JOURNAL OF COATINGS TECHNOLOGY AND RESEARCH	1547-0091	SCIE	JOURNAL OF COATINGS TECHNOLOGY AND RESEARCH
JOURNAL OF THE AUDIO ENGINEERING SOCIETY	1549-4950	SCIE	JOURNAL OF THE AUDIO ENGINEERING SOCIETY
ACM TRANSACTIONS ON ALGORITHMS	1549-6325	SCIE	ACM TRANSACTIONS ON ALGORITHMS
ACM TRANSACTIONS ON SENSOR NETWORKS	1550-4859	SCIE	ACM TRANSACTIONS ON SENSOR NETWORKS
ACM TRANSACTIONS ON STORAGE	1553-3077	SCIE	ACM TRANSACTIONS ON STORAGE
ACS CHEMICAL BIOLOGY	1554-8929	SCIE	ACS CHEMICAL BIOLOGY
CHINESE JOURNAL OF NATURAL MEDICINES	1672-3651	SCIE	CHINESE JOURNAL OF NATURAL MEDICINES
CLINICAL & DEVELOPMENTAL IMMUNOLOGY	1740-2522	SCIE	CLINICAL & DEVELOPMENTAL IMMUNOLOGY	OAJ	Hindawi Publishing Corporation
MICROBIAL BIOTECHNOLOGY	1751-7907	SCIE	MICROBIAL BIOTECHNOLOGY
ACS NANO	1936-0851	SCIE	ACS NANO
ACS APPLIED MATERIALS & INTERFACES	1944-8244	SCIE	ACS APPLIED MATERIALS & INTERFACES
ACS COMBINATORIAL SCIENCE	2156-8952	SCIE	ACS COMBINATORIAL SCIENCE
COMMUNICATIONS OF THE ACM	0001-0782	SCIE	COMMUNICATIONS OF THE ACM
ASHRAE JOURNAL	0001-2491	SCIE	ASHRAE JOURNAL
J INF SCI	0165-5515	SSCI
J INF TECHNOL	0268-3962	SSCI
J INST THEOR ECON	0932-4569	SSCI
J INTERACT MARK	1094-9968	SSCI
J INT BUS STUD	0047-2506	SSCI
TISSUE ANTIGENS	0001-2815	SCIE	TISSUE ANTIGENS
SEMINARS IN NUCLEAR MEDICINE	0001-2998	SCIE	SEMINARS IN NUCLEAR MEDICINE
ANAIS DA ACADEMIA BRASILEIRA DE CIENCIAS	0001-3765	SCIE	ANAIS DA ACADEMIA BRASILEIRA DE CIENCIAS	OAJ	Academia Brasileira de Ciências
BULLETIN DE L ACADEMIE NATIONALE DE MEDECINE	0001-4079	SCIE	BULLETIN DE L ACADEMIE NATIONALE DE MEDECINE
J INT DEV	0954-1748	SSCI
J INT ECON LAW	1369-3034	SSCI
J INT ECON	0022-1996	SSCI
OCEANOLOGY	0001-4370	SCIE	OCEANOLOGY
J INT MANAG	1075-4253	SSCI
J INT MARKETING	1069-031X	SSCI
J INT MONEY FINANC	0261-5606	SSCI
J INTERPERS VIOLENCE	0886-2605	SSCI
ACCOUNTS OF CHEMICAL RESEARCH	0001-4842	SCIE	ACCOUNTS OF CHEMICAL RESEARCH
JOURNAL OF THE ACOUSTICAL SOCIETY OF AMERICA	0001-4966	SCIE	JOURNAL OF THE ACOUSTICAL SOCIETY OF AMERICA
J KNOWL MANAG	1367-3270	SSCI
J KOREA TRADE	1229-828X	SSCI
JOURNAL OF KOREAN STUDIES	0731-1613	AHCI
J LABOR ECON	0734-306X	SSCI
ACTA ASTRONOMICA	0001-5237	SCIE	ACTA ASTRONOMICA
ACTA BIOCHIMICA POLONICA	0001-527X	SCIE	ACTA BIOCHIMICA POLONICA	OAJ	Acta Biochimica Polonica
ACTA BIOLOGICA CRACOVIENSIA SERIES BOTANICA	0001-5296	SCIE	ACTA BIOLOGICA CRACOVIENSIA SERIES BOTANICA	OAJ	Polish Academy of Sciences Publishing
ACTA CARDIOLOGICA	0001-5385	SCIE	ACTA CARDIOLOGICA
ACTA CHIRURGIAE ORTHOPAEDICAE ET TRAUMATOLOGIAE CECHOSLOVACA	0001-5415	SCIE	ACTA CHIRURGIAE ORTHOPAEDICAE ET TRAUMATOLOGIAE CECHOSLOVACA
ACTA CYTOLOGICA	0001-5547	SCIE	ACTA CYTOLOGICA
ACTA DERMATO-VENEREOLOGICA	0001-5555	SCIE	ACTA DERMATO-VENEREOLOGICA	OAJ	Society for Publication of Acta Dermato-Venereologica
HUMAN HEREDITY	0001-5652	SCIE	HUMAN HEREDITY
CHINESE JOURNAL OF GEOPHYSICS-CHINESE EDITION	0001-5733	SCIE	CHINESE JOURNAL OF GEOPHYSICS-CHINESE EDITION
ACTA HAEMATOLOGICA	0001-5792	SCIE	ACTA HAEMATOLOGICA
ACTA INFORMATICA	0001-5903	SCIE	ACTA INFORMATICA
ACTA MATHEMATICA	0001-5962	SCIE	ACTA MATHEMATICA
ACTA MECHANICA	0001-5970	SCIE	ACTA MECHANICA
ACTA NEUROCHIRURGICA	0001-6268	SCIE	ACTA NEUROCHIRURGICA
ACTA NEUROLOGICA SCANDINAVICA	0001-6314	SCIE	ACTA NEUROLOGICA SCANDINAVICA
ACTA NEUROPATHOLOGICA	0001-6322	SCIE	ACTA NEUROPATHOLOGICA
ACTA OBSTETRICIA ET GYNECOLOGICA SCANDINAVICA	0001-6349	SCIE	ACTA OBSTETRICIA ET GYNECOLOGICA SCANDINAVICA
ACTA ODONTOLOGICA SCANDINAVICA	0001-6357	SCIE	ACTA ODONTOLOGICA SCANDINAVICA
ACTA OTO-LARYNGOLOGICA	0001-6489	SCIE	ACTA OTO-LARYNGOLOGICA
J LANG SOC PSYCHOL	0261-927X	SSCI
ACTA POLONIAE PHARMACEUTICA	0001-6837	SCIE	ACTA POLONIAE PHARMACEUTICA
ACTA PSYCHIAT SCAND	0001-690X	SSCI
ACTA PSYCHOL	0001-6918	SSCI
J LAW ECON ORGAN	8756-6222	SSCI
ACTA THERIOLOGICA	0001-7051	SCIE	ACTA THERIOLOGICA
ACTA TROPICA	0001-706X	SCIE	ACTA TROPICA
ACTA VETERINARIA BRNO	0001-7213	SCIE	ACTA VETERINARIA BRNO	OAJ	University of Veterinary and Pharmaceutical Sciences, Brno
ACTA VIROLOGICA	0001-723X	SCIE	ACTA VIROLOGICA
ACTA ZOOLOGICA	0001-7272	SCIE	ACTA ZOOLOGICA
GENERAL RELATIVITY AND GRAVITATION	0001-7701	SCIE	GENERAL RELATIVITY AND GRAVITATION
BEHAV GENET	0001-8244	SSCI
JOURNAL OF LEUKOCYTE BIOLOGY	0741-5400	SCIE	JOURNAL OF LEUKOCYTE BIOLOGY
ADVANCES IN APPLIED PROBABILITY	0001-8678	SCIE	ADVANCES IN APPLIED PROBABILITY
ADVANCES IN COLLOID AND INTERFACE SCIENCE	0001-8686	SCIE	ADVANCES IN COLLOID AND INTERFACE SCIENCE
ADVANCES IN MATHEMATICS	0001-8708	SCIE	ADVANCES IN MATHEMATICS
JOURNAL OF LIMNOLOGY	1129-5767	SCIE	JOURNAL OF LIMNOLOGY	OAJ	PAGEPress Publications
J LINGUIST	0022-2267	SSCI
AEQUATIONES MATHEMATICAE	0001-9054	SCIE	AEQUATIONES MATHEMATICAE
AERONAUTICAL JOURNAL	0001-9240	SCIE	AERONAUTICAL JOURNAL
J NURS ADMIN	0002-0443	SSCI
AGE AND AGEING	0002-0729	SCIE	AGE AND AGEING
AGR HIST	0002-1482	SSCI
AGRONOMY JOURNAL	0002-1962	SCIE	AGRONOMY JOURNAL
ALDRICHIMICA ACTA	0002-5100	SCIE	ALDRICHIMICA ACTA
AMBIX	0002-6980	SCIE	AMBIX
AMEGHINIANA	0002-7014	SCIE	AMEGHINIANA
JOURNAL OF LITERARY SEMANTICS	0341-7638	AHCI
JOURNAL OF LOSS PREVENTION IN THE PROCESS INDUSTRIES	0950-4230	SCIE	JOURNAL OF LOSS PREVENTION IN THE PROCESS INDUSTRIES
JOURNAL OF THE AMERICAN ACADEMY OF RELIGION	0002-7189	AHCI
AM ANN DEAF	0002-726X	SSCI
AM ANTHROPOL	0002-7294	SSCI
AMERICAN BIOLOGY TEACHER	0002-7685	SCIE	AMERICAN BIOLOGY TEACHER
AMERICAN CERAMIC SOCIETY BULLETIN	0002-7812	SCIE	AMERICAN CERAMIC SOCIETY BULLETIN
JOURNAL OF THE AMERICAN CERAMIC SOCIETY	0002-7820	SCIE	JOURNAL OF THE AMERICAN CERAMIC SOCIETY
JOURNAL OF THE AMERICAN CHEMICAL SOCIETY	0002-7863	SCIE	JOURNAL OF THE AMERICAN CHEMICAL SOCIETY
JOURNAL OF THE AMERICAN DENTAL ASSOCIATION	0002-8177	SCIE	JOURNAL OF THE AMERICAN DENTAL ASSOCIATION
J MACROECON	0164-0704	SSCI
J MACROMARKETING	0276-1467	SSCI
AM EDUC RES J	0002-8312	SSCI
AMERICAN FAMILY PHYSICIAN	0002-838X	SCIE	AMERICAN FAMILY PHYSICIAN
AMERICAN FERN JOURNAL	0002-8444	SCIE	AMERICAN FERN JOURNAL
J AM GERIATR SOC	0002-8614	SSCI
AMERICAN HEART JOURNAL	0002-8703	SCIE	AMERICAN HEART JOURNAL
JOURNAL OF THE AMERICAN HELICOPTER SOCIETY	0002-8711	SCIE	JOURNAL OF THE AMERICAN HELICOPTER SOCIETY
AM HIST REV	0002-8762	SSCI
J MANAGE	0149-2063	SSCI
AMERICAN JOURNAL OF BOTANY	0002-9122	SCIE	AMERICAN JOURNAL OF BOTANY
AMERICAN JOURNAL OF CARDIOLOGY	0002-9149	SCIE	AMERICAN JOURNAL OF CARDIOLOGY
AMERICAN JOURNAL OF CLINICAL NUTRITION	0002-9165	SCIE	AMERICAN JOURNAL OF CLINICAL NUTRITION
AMERICAN JOURNAL OF CLINICAL PATHOLOGY	0002-9173	SCIE	AMERICAN JOURNAL OF CLINICAL PATHOLOGY
AMERICAN JOURNAL OF ENOLOGY AND VITICULTURE	0002-9254	SCIE	AMERICAN JOURNAL OF ENOLOGY AND VITICULTURE
AMERICAN JOURNAL OF EPIDEMIOLOGY	0002-9262	SCIE	AMERICAN JOURNAL OF EPIDEMIOLOGY
AMERICAN JOURNAL OF GASTROENTEROLOGY	0002-9270	SCIE	AMERICAN JOURNAL OF GASTROENTEROLOGY
AMERICAN JOURNAL OF HUMAN GENETICS	0002-9297	SCIE	AMERICAN JOURNAL OF HUMAN GENETICS
AMERICAN JOURNAL OF MATHEMATICS	0002-9327	SCIE	AMERICAN JOURNAL OF MATHEMATICS
AMERICAN JOURNAL OF MEDICINE	0002-9343	SCIE	AMERICAN JOURNAL OF MEDICINE
AM J NURS	0002-936X	SSCI
AMERICAN JOURNAL OF OBSTETRICS AND GYNECOLOGY	0002-9378	SCIE	AMERICAN JOURNAL OF OBSTETRICS AND GYNECOLOGY
AMERICAN JOURNAL OF OPHTHALMOLOGY	0002-9394	SCIE	AMERICAN JOURNAL OF OPHTHALMOLOGY
AM J ORTHOPSYCHIAT	0002-9432	SSCI
AMERICAN JOURNAL OF PATHOLOGY	0002-9440	SCIE	AMERICAN JOURNAL OF PATHOLOGY
AM J PHYS ANTHROPOL	0002-9483	SSCI
AMERICAN JOURNAL OF PHYSICS	0002-9505	SCIE	AMERICAN JOURNAL OF PHYSICS
JOURNAL OF MANAGEMENT IN ENGINEERING	0742-597X	SCIE	JOURNAL OF MANAGEMENT IN ENGINEERING
J MANAGE INFORM SYST	0742-1222	SSCI
J MANAGE STUD	0022-2380	SSCI
J MANAGE PSYCHOL	0268-3946	SSCI
J MARITAL FAM THER	0194-472X	SSCI
AM J PSYCHIAT	0002-953X	SSCI
J MARKETING	0022-2429	SSCI
AMERICAN JOURNAL OF SCIENCE	0002-9599	SCIE	AMERICAN JOURNAL OF SCIENCE
J MARKETING RES	0022-2437	SSCI
AMERICAN JOURNAL OF SURGERY	0002-9610	SCIE	AMERICAN JOURNAL OF SURGERY
AMERICAN JOURNAL OF THE MEDICAL SCIENCES	0002-9629	SCIE	AMERICAN JOURNAL OF THE MEDICAL SCIENCES
AMERICAN JOURNAL OF TROPICAL MEDICINE AND HYGIENE	0002-9637	SCIE	AMERICAN JOURNAL OF TROPICAL MEDICINE AND HYGIENE
AMERICAN JOURNAL OF VETERINARY RESEARCH	0002-9645	SCIE	AMERICAN JOURNAL OF VETERINARY RESEARCH
AMERICAN MATHEMATICAL MONTHLY	0002-9890	SCIE	AMERICAN MATHEMATICAL MONTHLY
PROCEEDINGS OF THE AMERICAN MATHEMATICAL SOCIETY	0002-9939	SCIE	PROCEEDINGS OF THE AMERICAN MATHEMATICAL SOCIETY
J MARRIAGE FAM	0022-2445	SSCI
BULLETIN OF THE AMERICAN METEOROLOGICAL SOCIETY	0003-0007	SCIE	BULLETIN OF THE AMERICAN METEOROLOGICAL SOCIETY
AMERICAN MIDLAND NATURALIST	0003-0031	SCIE	AMERICAN MIDLAND NATURALIST
AMERICAN MINERALOGIST	0003-004X	SCIE	AMERICAN MINERALOGIST
BULLETIN OF THE AMERICAN MUSEUM OF NATURAL HISTORY	0003-0090	SCIE	BULLETIN OF THE AMERICAN MUSEUM OF NATURAL HISTORY	OAJ	American Museum of Natural History
AMERICAN NATURALIST	0003-0147	SCIE	AMERICAN NATURALIST
JOURNAL OF THE AMERICAN OIL CHEMISTS SOCIETY	0003-021X	SCIE	JOURNAL OF THE AMERICAN OIL CHEMISTS SOCIETY
AMERICAN SCIENTIST	0003-0996	SCIE	AMERICAN SCIENTIST
JOURNAL OF THE AMERICAN SOCIETY FOR HORTICULTURAL SCIENCE	0003-1062	SCIE	JOURNAL OF THE AMERICAN SOCIETY FOR HORTICULTURAL SCIENCE
AMERICAN STATISTICIAN	0003-1305	SCIE	AMERICAN STATISTICIAN
AMERICAN SURGEON	0003-1348	SCIE	AMERICAN SURGEON
JAVMA-JOURNAL OF THE AMERICAN VETERINARY MEDICAL ASSOCIATION	0003-1488	SCIE	JAVMA-JOURNAL OF THE AMERICAN VETERINARY MEDICAL ASSOCIATION
J MATH ECON	0304-4068	SSCI
ANAESTHESIA	0003-2409	SCIE	ANAESTHESIA
ANAESTHESIST	0003-2417	SCIE	ANAESTHESIST
ANALYST	0003-2654	SCIE	ANALYST
ANALYTICA CHIMICA ACTA	0003-2670	SCIE	ANALYTICA CHIMICA ACTA
ANALYTICAL BIOCHEMISTRY	0003-2697	SCIE	ANALYTICAL BIOCHEMISTRY
ANALYTICAL CHEMISTRY	0003-2700	SCIE	ANALYTICAL CHEMISTRY
ANALYTICAL LETTERS	0003-2719	SCIE	ANALYTICAL LETTERS
JOURNAL OF THE ANATOMICAL SOCIETY OF INDIA	0003-2778	SCIE	JOURNAL OF THE ANATOMICAL SOCIETY OF INDIA
ANESTHESIA AND ANALGESIA	0003-2999	SCIE	ANESTHESIA AND ANALGESIA
ANESTHESIOLOGY	0003-3022	SCIE	ANESTHESIOLOGY
ANGIOLOGY	0003-3197	SCIE	ANGIOLOGY
ANGLE ORTHODONTIST	0003-3219	SCIE	ANGLE ORTHODONTIST	OAJ	E.H Angle Education and Research Foundation
ANIMAL BEHAVIOUR	0003-3472	SCIE	ANIMAL BEHAVIOUR
ANNALEN DER PHYSIK	0003-3804	SCIE	ANNALEN DER PHYSIK
ANNALES BOTANICI FENNICI	0003-3847	SCIE	ANNALES BOTANICI FENNICI
J MEDIA ECON	0899-7764	SSCI
ANNALES D ENDOCRINOLOGIE	0003-4266	SCIE	ANNALES D ENDOCRINOLOGIE
ANNALS OF TELECOMMUNICATIONS-ANNALES DES TELECOMMUNICATIONS	0003-4347	SCIE	ANNALS OF TELECOMMUNICATIONS-ANNALES DES TELECOMMUNICATIONS
ANNALES ZOOLOGICI	0003-4541	SCIE	ANNALES ZOOLOGICI
ANNALES ZOOLOGICI FENNICI	0003-455X	SCIE	ANNALES ZOOLOGICI FENNICI
ANNALI ITALIANI DI CHIRURGIA	0003-469X	SCIE	ANNALI ITALIANI DI CHIRURGIA
ANNALS OF APPLIED BIOLOGY	0003-4746	SCIE	ANNALS OF APPLIED BIOLOGY
ANNALS OF HUMAN GENETICS	0003-4800	SCIE	ANNALS OF HUMAN GENETICS
ANNALS OF INTERNAL MEDICINE	0003-4819	SCIE	ANNALS OF INTERNAL MEDICINE
ANNALS OF MATHEMATICS	0003-486X	SCIE	ANNALS OF MATHEMATICS
ANNALS OF OCCUPATIONAL HYGIENE	0003-4878	SCIE	ANNALS OF OCCUPATIONAL HYGIENE
ANNALS OF OTOLOGY RHINOLOGY AND LARYNGOLOGY	0003-4894	SCIE	ANNALS OF OTOLOGY RHINOLOGY AND LARYNGOLOGY
ANNALS OF PHYSICS	0003-4916	SCIE	ANNALS OF PHYSICS
ANNALS OF SURGERY	0003-4932	SCIE	ANNALS OF SURGERY
ANNALS OF THE RHEUMATIC DISEASES	0003-4967	SCIE	ANNALS OF THE RHEUMATIC DISEASES
ANNALS OF THORACIC SURGERY	0003-4975	SCIE	ANNALS OF THORACIC SURGERY
ANTHROPOLOGIE	0003-5521	SSCI
ANTHROPOL ANZ	0003-5548	SSCI
ANTIOCH REVIEW	0003-5769	AHCI
ANTONIE VAN LEEUWENHOEK INTERNATIONAL JOURNAL OF GENERAL AND MOLECULAR MICROBIOLOGY	0003-6072	SCIE	ANTONIE VAN LEEUWENHOEK INTERNATIONAL JOURNAL OF GENERAL AND MOLECULAR MICROBIOLOGY
APPLICABLE ANALYSIS	0003-6811	SCIE	APPLICABLE ANALYSIS
APPLIED ACOUSTICS	0003-682X	SCIE	APPLIED ACOUSTICS
APPLIED BIOCHEMISTRY AND MICROBIOLOGY	0003-6838	SCIE	APPLIED BIOCHEMISTRY AND MICROBIOLOGY
APPLIED ENTOMOLOGY AND ZOOLOGY	0003-6862	SCIE	APPLIED ENTOMOLOGY AND ZOOLOGY
APPL ERGON	0003-6870	SSCI
APPLIED MECHANICS REVIEWS	0003-6900	SCIE	APPLIED MECHANICS REVIEWS
APPLIED PHYSICS LETTERS	0003-6951	SCIE	APPLIED PHYSICS LETTERS
APPLIED SPECTROSCOPY	0003-7028	SCIE	APPLIED SPECTROSCOPY
ARCHAEOMETRY	0003-813X	SCIE	ARCHAEOMETRY
ARCHIV DER MATHEMATIK	0003-889X	SCIE	ARCHIV DER MATHEMATIK
ARCHIV FUR GEFLUGELKUNDE	0003-9098	SCIE	ARCHIV FUR GEFLUGELKUNDE
ARCHIV FUR TIERZUCHT-ARCHIVES OF ANIMAL BREEDING	0003-9438	SCIE	ARCHIV FUR TIERZUCHT-ARCHIVES OF ANIMAL BREEDING
ARCH HIST EXACT SCI	0003-9519	SSCI
ARCHIVE FOR RATIONAL MECHANICS AND ANALYSIS	0003-9527	SCIE	ARCHIVE FOR RATIONAL MECHANICS AND ANALYSIS
JOURNAL OF MILITARY HISTORY	0899-3718	AHCI
ARCHIVES ITALIENNES DE BIOLOGIE	0003-9829	SCIE	ARCHIVES ITALIENNES DE BIOLOGIE
ARCHIVES OF BIOCHEMISTRY AND BIOPHYSICS	0003-9861	SCIE	ARCHIVES OF BIOCHEMISTRY AND BIOPHYSICS
ARCHIVES OF DISEASE IN CHILDHOOD	0003-9888	SCIE	ARCHIVES OF DISEASE IN CHILDHOOD
ARCHIVES OF ORAL BIOLOGY	0003-9969	SCIE	ARCHIVES OF ORAL BIOLOGY
ARCHIVES OF PATHOLOGY & LABORATORY MEDICINE	0003-9985	SCIE	ARCHIVES OF PATHOLOGY & LABORATORY MEDICINE
ARCHIVES OF PHYSICAL MEDICINE AND REHABILITATION	0003-9993	SCIE	ARCHIVES OF PHYSICAL MEDICINE AND REHABILITATION
J MONETARY ECON	0304-3932	SSCI
J MONEY CREDIT BANK	0022-2879	SSCI
ARCHIVOS ESPANOLES DE UROLOGIA	0004-0614	SCIE	ARCHIVOS ESPANOLES DE UROLOGIA
ARCHIVOS LATINOAMERICANOS DE NUTRICION	0004-0622	SCIE	ARCHIVOS LATINOAMERICANOS DE NUTRICION
ARCHIVUM IMMUNOLOGIAE ET THERAPIAE EXPERIMENTALIS	0004-069X	SCIE	ARCHIVUM IMMUNOLOGIAE ET THERAPIAE EXPERIMENTALIS
ARCTIC	0004-0843	SCIE	ARCTIC
ARKIV FOR MATEMATIK	0004-2080	SCIE	ARKIV FOR MATEMATIK
ARQUIVOS BRASILEIROS DE ENDOCRINOLOGIA E METABOLOGIA	0004-2730	SCIE	ARQUIVOS BRASILEIROS DE ENDOCRINOLOGIA E METABOLOGIA	OAJ	Sociedade Brasileira de Endocrinologia e Metabologia
ARQUIVOS BRASILEIROS DE OFTALMOLOGIA	0004-2749	SCIE	ARQUIVOS BRASILEIROS DE OFTALMOLOGIA	OAJ	Conselho Brasileiro de Oftalmologia
ARQUIVOS DE NEURO-PSIQUIATRIA	0004-282X	SCIE	ARQUIVOS DE NEURO-PSIQUIATRIA	OAJ	Academia Brasileira de Neurologia - ABNEURO
ARTIFICIAL INTELLIGENCE	0004-3702	SCIE	ARTIFICIAL INTELLIGENCE
J MOTOR BEHAV	0022-2895	SSCI
JOURNAL OF THE ACM	0004-5411	SCIE	JOURNAL OF THE ACM
ANNALS OF CLINICAL BIOCHEMISTRY	0004-5632	SCIE	ANNALS OF CLINICAL BIOCHEMISTRY
ASTRONOMICAL JOURNAL	0004-6256	SCIE	ASTRONOMICAL JOURNAL
PUBLICATIONS OF THE ASTRONOMICAL SOCIETY OF JAPAN	0004-6264	SCIE	PUBLICATIONS OF THE ASTRONOMICAL SOCIETY OF JAPAN
PUBLICATIONS OF THE ASTRONOMICAL SOCIETY OF THE PACIFIC	0004-6280	SCIE	PUBLICATIONS OF THE ASTRONOMICAL SOCIETY OF THE PACIFIC
ASTRONOMISCHE NACHRICHTEN	0004-6337	SCIE	ASTRONOMISCHE NACHRICHTEN
ASTRONOMY & ASTROPHYSICS	0004-6361	SCIE	ASTRONOMY & ASTROPHYSICS
ASTROPHYSICAL JOURNAL	0004-637X	SCIE	ASTROPHYSICAL JOURNAL
ASTROPHYSICS AND SPACE SCIENCE	0004-640X	SCIE	ASTROPHYSICS AND SPACE SCIENCE
AUK	0004-8038	SCIE	AUK
AUSTRALASIAN JOURNAL OF DERMATOLOGY	0004-8380	SCIE	AUSTRALASIAN JOURNAL OF DERMATOLOGY
AUSTRALIAN & NEW ZEALAND JOURNAL OF OBSTETRICS & GYNAECOLOGY	0004-8666	SCIE	AUSTRALIAN & NEW ZEALAND JOURNAL OF OBSTETRICS & GYNAECOLOGY
AUST NZ J PSYCHIAT	0004-8674	SSCI
AUST ECON HIST REV	0004-8992	SSCI
AUST ECON PAP	0004-900X	SSCI
AUSTRALIAN FORESTRY	0004-9158	SCIE	AUSTRALIAN FORESTRY
AUSTRALIAN JOURNAL OF CHEMISTRY	0004-9425	SCIE	AUSTRALIAN JOURNAL OF CHEMISTRY
AUST J EDUC	0004-9441	SSCI
J NEUROPSYCHOL	1748-6645	SSCI
J OCCUP ORGAN PSYCH	0963-1798	SSCI
J OCCUP HEALTH PSYCH	1076-8998	SSCI
AUSTRALIAN JOURNAL OF ZOOLOGY	0004-959X	SCIE	AUSTRALIAN JOURNAL OF ZOOLOGY
BULLETIN OF THE AUSTRALIAN MATHEMATICAL SOCIETY	0004-9727	SCIE	BULLETIN OF THE AUSTRALIAN MATHEMATICAL SOCIETY
AUSTRALIAN VETERINARY JOURNAL	0005-0423	SCIE	AUSTRALIAN VETERINARY JOURNAL
AUTOMATICA	0005-1098	SCIE	AUTOMATICA
AUTOMATION AND REMOTE CONTROL	0005-1179	SCIE	AUTOMATION AND REMOTE CONTROL
AVIAN DISEASES	0005-2086	SCIE	AVIAN DISEASES
BIOCHIMICA ET BIOPHYSICA ACTA-BIOENERGETICS	0005-2728	SCIE	BIOCHIMICA ET BIOPHYSICA ACTA-BIOENERGETICS
BIOCHIMICA ET BIOPHYSICA ACTA-BIOMEMBRANES	0005-2736	SCIE	BIOCHIMICA ET BIOPHYSICA ACTA-BIOMEMBRANES
BEHAV THER	0005-7894	SSCI
J BEHAV THER EXP PSY	0005-7916	SSCI
BEHAVIOUR	0005-7959	SCIE	BEHAVIOUR
BEHAV RES THER	0005-7967	SSCI
BIOCHEMICAL AND BIOPHYSICAL RESEARCH COMMUNICATIONS	0006-291X	SCIE	BIOCHEMICAL AND BIOPHYSICAL RESEARCH COMMUNICATIONS
BIOCHEMICAL GENETICS	0006-2928	SCIE	BIOCHEMICAL GENETICS
BIOCHEMICAL PHARMACOLOGY	0006-2952	SCIE	BIOCHEMICAL PHARMACOLOGY
BIOCHEMISTRY	0006-2960	SCIE	BIOCHEMISTRY
BIOCHEMISTRY-MOSCOW	0006-2979	SCIE	BIOCHEMISTRY-MOSCOW
BIOLOGIA PLANTARUM	0006-3134	SCIE	BIOLOGIA PLANTARUM
BIOLOGICAL BULLETIN	0006-3185	SCIE	BIOLOGICAL BULLETIN
BIOLOGICAL CONSERVATION	0006-3207	SCIE	BIOLOGICAL CONSERVATION
BIOLOGICAL PSYCHIATRY	0006-3223	SCIE	BIOLOGICAL PSYCHIATRY
BIOLOGY OF REPRODUCTION	0006-3363	SCIE	BIOLOGY OF REPRODUCTION
BIOMETRICS	0006-341X	SCIE	BIOMETRICS
BIOMETRIKA	0006-3444	SCIE	BIOMETRIKA
BIOPHYSICAL JOURNAL	0006-3495	SCIE	BIOPHYSICAL JOURNAL
BIOPOLYMERS	0006-3525	SCIE	BIOPOLYMERS
BIORHEOLOGY	0006-355X	SCIE	BIORHEOLOGY
BIOSCIENCE	0006-3568	SCIE	BIOSCIENCE
BIOTECHNOLOGY AND BIOENGINEERING	0006-3592	SCIE	BIOTECHNOLOGY AND BIOENGINEERING
BIOTROPICA	0006-3606	SCIE	BIOTROPICA
BIRD STUDY	0006-3657	SCIE	BIRD STUDY
BIT NUMERICAL MATHEMATICS	0006-3835	SCIE	BIT NUMERICAL MATHEMATICS
BLOOD	0006-4971	SCIE	BLOOD
BLUMEA	0006-5196	SCIE	BLUMEA
BOTANICA MARINA	0006-8055	SCIE	BOTANICA MARINA
BOTANICAL REVIEW	0006-8101	SCIE	BOTANICAL REVIEW
BOUNDARY-LAYER METEOROLOGY	0006-8314	SCIE	BOUNDARY-LAYER METEOROLOGY
BRAGANTIA	0006-8705	SCIE	BRAGANTIA	OAJ	Instituto Agronômico de Campinas
BRAIN	0006-8950	SCIE	BRAIN
BRAIN RESEARCH	0006-8993	SCIE	BRAIN RESEARCH
BRATISLAVA MEDICAL JOURNAL-BRATISLAVSKE LEKARSKE LISTY	0006-9248	SCIE	BRATISLAVA MEDICAL JOURNAL-BRATISLAVSKE LEKARSKE LISTY
BRITISH DENTAL JOURNAL	0007-0610	SCIE	BRITISH DENTAL JOURNAL
BRITISH FOOD JOURNAL	0007-070X	SCIE	BRITISH FOOD JOURNAL
BRIT J PHILOS SCI	0007-0882	SSCI
BRITISH JOURNAL OF ANAESTHESIA	0007-0912	SCIE	BRITISH JOURNAL OF ANAESTHESIA
BRITISH JOURNAL OF CANCER	0007-0920	SCIE	BRITISH JOURNAL OF CANCER	OAJ	Cancer Research UK
BRITISH JOURNAL OF DERMATOLOGY	0007-0963	SCIE	BRITISH JOURNAL OF DERMATOLOGY
BRIT J EDUC TECHNOL	0007-1013	SSCI
BRITISH JOURNAL OF HAEMATOLOGY	0007-1048	SCIE	BRITISH JOURNAL OF HAEMATOLOGY
BRITISH JOURNAL OF NUTRITION	0007-1145	SCIE	BRITISH JOURNAL OF NUTRITION
BRITISH JOURNAL OF OPHTHALMOLOGY	0007-1161	SCIE	BRITISH JOURNAL OF OPHTHALMOLOGY
BRITISH JOURNAL OF PHARMACOLOGY	0007-1188	SCIE	BRITISH JOURNAL OF PHARMACOLOGY
J ORGAN BEHAV	0894-3796	SSCI
BRIT J PSYCHIAT	0007-1250	SSCI
J ORGAN CHANGE MANAG	0953-4814	SSCI
BRITISH JOURNAL OF RADIOLOGY	0007-1285	SCIE	BRITISH JOURNAL OF RADIOLOGY
BRITISH JOURNAL OF SURGERY	0007-1323	SCIE	BRITISH JOURNAL OF SURGERY
BRITISH MEDICAL BULLETIN	0007-1420	SCIE	BRITISH MEDICAL BULLETIN
BRITISH POULTRY SCIENCE	0007-1668	SCIE	BRITISH POULTRY SCIENCE
BRITTONIA	0007-196X	SCIE	BRITTONIA
J PALLIAT CARE	0825-8597	SSCI
BRYOLOGIST	0007-2745	SCIE	BRYOLOGIST
BULLETIN DES SCIENCES MATHEMATIQUES	0007-4497	SCIE	BULLETIN DES SCIENCES MATHEMATIQUES
BULLETIN DU CANCER	0007-4551	SCIE	BULLETIN DU CANCER
BULLETIN OF ENTOMOLOGICAL RESEARCH	0007-4853	SCIE	BULLETIN OF ENTOMOLOGICAL RESEARCH
BULLETIN OF ENVIRONMENTAL CONTAMINATION AND TOXICOLOGY	0007-4861	SCIE	BULLETIN OF ENVIRONMENTAL CONTAMINATION AND TOXICOLOGY
BULLETIN OF EXPERIMENTAL BIOLOGY AND MEDICINE	0007-4888	SCIE	BULLETIN OF EXPERIMENTAL BIOLOGY AND MEDICINE
BULLETIN OF MARINE SCIENCE	0007-4977	SCIE	BULLETIN OF MARINE SCIENCE
LABMEDICINE	0007-5027	SCIE	LABMEDICINE
BUS HORIZONS	0007-6813	SSCI
CIRP ANNALS-MANUFACTURING TECHNOLOGY	0007-8506	SCIE	CIRP ANNALS-MANUFACTURING TECHNOLOGY
CA-A CANCER JOURNAL FOR CLINICIANS	0007-9235	SCIE	CA-A CANCER JOURNAL FOR CLINICIANS
CAHIERS DE BIOLOGIE MARINE	0007-9723	SCIE	CAHIERS DE BIOLOGIE MARINE
J PEACE RES	0022-3433	SSCI
CALCOLO	0008-0624	SCIE	CALCOLO
J PEDIATR PSYCHOL	0146-8693	SSCI
J PERS	0022-3506	SSCI
CANADIAN ENTOMOLOGIST	0008-347X	SCIE	CANADIAN ENTOMOLOGIST
CANADIAN FAMILY PHYSICIAN	0008-350X	SCIE	CANADIAN FAMILY PHYSICIAN	OAJ	College of Family Physicians of Canada
CANADIAN GEOTECHNICAL JOURNAL	0008-3674	SCIE	CANADIAN GEOTECHNICAL JOURNAL
CANADIAN JOURNAL OF ANIMAL SCIENCE	0008-3984	SCIE	CANADIAN JOURNAL OF ANIMAL SCIENCE
J PERS SOC PSYCHOL	0022-3514	SSCI
CANADIAN JOURNAL OF CHEMICAL ENGINEERING	0008-4034	SCIE	CANADIAN JOURNAL OF CHEMICAL ENGINEERING
CANADIAN JOURNAL OF CHEMISTRY-REVUE CANADIENNE DE CHIMIE	0008-4042	SCIE	CANADIAN JOURNAL OF CHEMISTRY-REVUE CANADIENNE DE CHIMIE
CANADIAN JOURNAL OF EARTH SCIENCES	0008-4077	SCIE	CANADIAN JOURNAL OF EARTH SCIENCES
CANADIAN JOURNAL OF MATHEMATICS-JOURNAL CANADIEN DE MATHEMATIQUES	0008-414X	SCIE	CANADIAN JOURNAL OF MATHEMATICS-JOURNAL CANADIEN DE MATHEMATIQUES
CANADIAN JOURNAL OF MICROBIOLOGY	0008-4166	SCIE	CANADIAN JOURNAL OF MICROBIOLOGY
CAN J OCCUP THER	0008-4174	SSCI
CANADIAN JOURNAL OF OPHTHALMOLOGY-JOURNAL CANADIEN D OPHTALMOLOGIE	0008-4182	SCIE	CANADIAN JOURNAL OF OPHTHALMOLOGY-JOURNAL CANADIEN D OPHTALMOLOGIE
CANADIAN JOURNAL OF PHYSICS	0008-4204	SCIE	CANADIAN JOURNAL OF PHYSICS
CANADIAN JOURNAL OF PHYSIOLOGY AND PHARMACOLOGY	0008-4212	SCIE	CANADIAN JOURNAL OF PHYSIOLOGY AND PHARMACOLOGY
CANADIAN JOURNAL OF PLANT SCIENCE	0008-4220	SCIE	CANADIAN JOURNAL OF PLANT SCIENCE
CAN J PUBLIC HEALTH	0008-4263	SSCI
CANADIAN JOURNAL OF SOIL SCIENCE	0008-4271	SCIE	CANADIAN JOURNAL OF SOIL SCIENCE
CANADIAN JOURNAL OF SURGERY	0008-428X	SCIE	CANADIAN JOURNAL OF SURGERY
CANADIAN JOURNAL OF ZOOLOGY-REVUE CANADIENNE DE ZOOLOGIE	0008-4301	SCIE	CANADIAN JOURNAL OF ZOOLOGY-REVUE CANADIENNE DE ZOOLOGIE
CANADIAN MATHEMATICAL BULLETIN-BULLETIN CANADIEN DE MATHEMATIQUES	0008-4395	SCIE	CANADIAN MATHEMATICAL BULLETIN-BULLETIN CANADIEN DE MATHEMATIQUES
CANADIAN METALLURGICAL QUARTERLY	0008-4433	SCIE	CANADIAN METALLURGICAL QUARTERLY
CANADIAN MINERALOGIST	0008-4476	SCIE	CANADIAN MINERALOGIST
CAN MOD LANG REV	0008-4506	SSCI
CANADIAN VETERINARY JOURNAL-REVUE VETERINAIRE CANADIENNE	0008-5286	SCIE	CANADIAN VETERINARY JOURNAL-REVUE VETERINAIRE CANADIENNE
CANCER	0008-543X	SCIE	CANCER
CANCER RESEARCH	0008-5472	SCIE	CANCER RESEARCH
CARBOHYDRATE RESEARCH	0008-6215	SCIE	CARBOHYDRATE RESEARCH
CARBON	0008-6223	SCIE	CARBON
CARDIOLOGY	0008-6312	SCIE	CARDIOLOGY
CARDIOVASCULAR RESEARCH	0008-6363	SCIE	CARDIOVASCULAR RESEARCH
CARIES RESEARCH	0008-6568	SCIE	CARIES RESEARCH
J PERS ASSESS	0022-3891	SSCI
CASTANEA	0008-7475	SCIE	CASTANEA
CELLULAR IMMUNOLOGY	0008-8749	SCIE	CELLULAR IMMUNOLOGY
CEMENT AND CONCRETE RESEARCH	0008-8846	SCIE	CEMENT AND CONCRETE RESEARCH
CENTAURUS	0008-8994	SSCI
J PERS DISORD	0885-579X	SSCI
CHEMICAL & ENGINEERING NEWS	0009-2347	SCIE	CHEMICAL & ENGINEERING NEWS
CHEMICAL & PHARMACEUTICAL BULLETIN	0009-2363	SCIE	CHEMICAL & PHARMACEUTICAL BULLETIN
CHEMICAL ENGINEERING	0009-2460	SCIE	CHEMICAL ENGINEERING
CHEMICAL ENGINEERING SCIENCE	0009-2509	SCIE	CHEMICAL ENGINEERING SCIENCE
CHEMICAL GEOLOGY	0009-2541	SCIE	CHEMICAL GEOLOGY
CHEMICAL PHYSICS LETTERS	0009-2614	SCIE	CHEMICAL PHYSICS LETTERS
CHEMICAL REVIEWS	0009-2665	SCIE	CHEMICAL REVIEWS
BULLETIN OF THE CHEMICAL SOCIETY OF JAPAN	0009-2673	SCIE	BULLETIN OF THE CHEMICAL SOCIETY OF JAPAN
CHEMIE DER ERDE-GEOCHEMISTRY	0009-2819	SCIE	CHEMIE DER ERDE-GEOCHEMISTRY
CHEMIE INGENIEUR TECHNIK	0009-286X	SCIE	CHEMIE INGENIEUR TECHNIK
CHEMISTRY & INDUSTRY	0009-3068	SCIE	CHEMISTRY & INDUSTRY
CHEMISTRY AND PHYSICS OF LIPIDS	0009-3084	SCIE	CHEMISTRY AND PHYSICS OF LIPIDS
CHEMISTRY OF HETEROCYCLIC COMPOUNDS	0009-3122	SCIE	CHEMISTRY OF HETEROCYCLIC COMPOUNDS
CHEMISTRY OF NATURAL COMPOUNDS	0009-3130	SCIE	CHEMISTRY OF NATURAL COMPOUNDS
CHEMOTHERAPY	0009-3157	SCIE	CHEMOTHERAPY
CHIMIA	0009-4293	SCIE	CHIMIA
JOURNAL OF THE CHINESE CHEMICAL SOCIETY	0009-4536	SCIE	JOURNAL OF THE CHINESE CHEMICAL SOCIETY
CHIRURG	0009-4722	SCIE	CHIRURG
CHROMATOGRAPHIA	0009-5893	SCIE	CHROMATOGRAPHIA
CHROMOSOMA	0009-5915	SCIE	CHROMOSOMA
CIRCULATION	0009-7322	SCIE	CIRCULATION
CIRCULATION RESEARCH	0009-7330	SCIE	CIRCULATION RESEARCH
CLAY MINERALS	0009-8558	SCIE	CLAY MINERALS
CLAYS AND CLAY MINERALS	0009-8604	SCIE	CLAYS AND CLAY MINERALS
CLINICA CHIMICA ACTA	0009-8981	SCIE	CLINICA CHIMICA ACTA
CLINICA TERAPEUTICA	0009-9074	SCIE	CLINICA TERAPEUTICA
CLINICAL AND EXPERIMENTAL IMMUNOLOGY	0009-9104	SCIE	CLINICAL AND EXPERIMENTAL IMMUNOLOGY
CLINICAL BIOCHEMISTRY	0009-9120	SCIE	CLINICAL BIOCHEMISTRY
CLINICAL CHEMISTRY	0009-9147	SCIE	CLINICAL CHEMISTRY
CLINICAL GENETICS	0009-9163	SCIE	CLINICAL GENETICS
CLINICAL OBSTETRICS AND GYNECOLOGY	0009-9201	SCIE	CLINICAL OBSTETRICS AND GYNECOLOGY
CLINICAL ORTHOPAEDICS AND RELATED RESEARCH	0009-921X	SCIE	CLINICAL ORTHOPAEDICS AND RELATED RESEARCH
CLINICAL PEDIATRICS	0009-9228	SCIE	CLINICAL PEDIATRICS
CLINICAL PHARMACOLOGY & THERAPEUTICS	0009-9236	SCIE	CLINICAL PHARMACOLOGY & THERAPEUTICS
CLINICAL RADIOLOGY	0009-9260	SCIE	CLINICAL RADIOLOGY
COLEOPTERISTS BULLETIN	0010-065X	SCIE	COLEOPTERISTS BULLETIN
J POLICY ANAL MANAG	0276-8739	SSCI
J POLICY MODEL	0161-8938	SSCI
COLLOQUIUM MATHEMATICUM	0010-1354	SCIE	COLLOQUIUM MATHEMATICUM
COMBUSTION AND FLAME	0010-2180	SCIE	COMBUSTION AND FLAME
COMBUSTION SCIENCE AND TECHNOLOGY	0010-2202	SCIE	COMBUSTION SCIENCE AND TECHNOLOGY
COMMENTARII MATHEMATICI HELVETICI	0010-2571	SCIE	COMMENTARII MATHEMATICI HELVETICI
COMMUNICATIONS IN MATHEMATICAL PHYSICS	0010-3616	SCIE	COMMUNICATIONS IN MATHEMATICAL PHYSICS
COMMUNICATIONS IN SOIL SCIENCE AND PLANT ANALYSIS	0010-3624	SCIE	COMMUNICATIONS IN SOIL SCIENCE AND PLANT ANALYSIS
COMMUNICATIONS ON PURE AND APPLIED MATHEMATICS	0010-3640	SCIE	COMMUNICATIONS ON PURE AND APPLIED MATHEMATICS
COMMUNITY MENT HLT J	0010-3853	SSCI
COMP EDUC REV	0010-4086	SSCI
J POP CULT	0022-3840	SSCI
J POPUL ECON	0933-1433	SSCI
J PORTFOLIO MANAGE	0095-4918	SSCI
J POST KEYNESIAN EC	0160-3477	SSCI
COMPOSITIO MATHEMATICA	0010-437X	SCIE	COMPOSITIO MATHEMATICA
COMPR PSYCHIAT	0010-440X	SSCI
COMPUTER-AIDED DESIGN	0010-4485	SCIE	COMPUTER-AIDED DESIGN
COMPUTER JOURNAL	0010-4620	SCIE	COMPUTER JOURNAL
COMPUTER PHYSICS COMMUNICATIONS	0010-4655	SCIE	COMPUTER PHYSICS COMMUNICATIONS
COMPUTERS IN BIOLOGY AND MEDICINE	0010-4825	SCIE	COMPUTERS IN BIOLOGY AND MEDICINE
COMPUTING	0010-485X	SCIE	COMPUTING
COMBUSTION EXPLOSION AND SHOCK WAVES	0010-5082	SCIE	COMBUSTION EXPLOSION AND SHOCK WAVES
CONDOR	0010-5422	SCIE	CONDOR
CONTEMPORARY PHYSICS	0010-7514	SCIE	CONTEMPORARY PHYSICS
CONTRACEPTION	0010-7824	SCIE	CONTRACEPTION
CONTRIBUTIONS TO MINERALOGY AND PETROLOGY	0010-7999	SCIE	CONTRIBUTIONS TO MINERALOGY AND PETROLOGY
COORDINATION CHEMISTRY REVIEWS	0010-8545	SCIE	COORDINATION CHEMISTRY REVIEWS
CORROSION	0010-9312	SCIE	CORROSION
CORROSION SCIENCE	0010-938X	SCIE	CORROSION SCIENCE
CORTEX	0010-9452	SCIE	CORTEX
COSMIC RESEARCH	0010-9525	SCIE	COSMIC RESEARCH
CROATICA CHEMICA ACTA	0011-1643	SCIE	CROATICA CHEMICA ACTA	OAJ	Croatian Chemical Society
CROP SCIENCE	0011-183X	SCIE	CROP SCIENCE
CRUSTACEANA	0011-216X	SCIE	CRUSTACEANA
CRYOBIOLOGY	0011-2240	SCIE	CRYOBIOLOGY
CRYOGENICS	0011-2275	SCIE	CRYOGENICS
CURRENT PROBLEMS IN SURGERY	0011-3840	SCIE	CURRENT PROBLEMS IN SURGERY
CURRENT SCIENCE	0011-3891	SCIE	CURRENT SCIENCE
J PROD INNOVAT MANAG	0737-6782	SSCI
CUTIS	0011-4162	SCIE	CUTIS
CYTOLOGIA	0011-4545	SCIE	CYTOLOGIA
J PROD ANAL	0895-562X	SSCI
CZECHOSLOVAK MATHEMATICAL JOURNAL	0011-4642	SCIE	CZECHOSLOVAK MATHEMATICAL JOURNAL
J PSYCHOACTIVE DRUGS	0279-1072	SSCI
J PSYCHOEDUC ASSESS	0734-2829	SSCI
J PSYCHOLINGUIST RES	0090-6905	SSCI
J PSYCHOL THEOL	0091-6471	SSCI
J PSYCHOSOC ONCOL	0734-7332	SSCI
DEFENCE SCIENCE JOURNAL	0011-748X	SCIE	DEFENCE SCIENCE JOURNAL	OAJ	Defence Scientific Information & Documentation Centre, Delhi
INTERNATIONAL JOURNAL OF DERMATOLOGY	0011-9059	SCIE	INTERNATIONAL JOURNAL OF DERMATOLOGY
DESALINATION	0011-9164	SCIE	DESALINATION
DEUTSCHE LEBENSMITTEL-RUNDSCHAU	0012-0413	SCIE	DEUTSCHE LEBENSMITTEL-RUNDSCHAU
DEUTSCHE MEDIZINISCHE WOCHENSCHRIFT	0012-0472	SCIE	DEUTSCHE MEDIZINISCHE WOCHENSCHRIFT
J PUBL ADM RES THEOR	1053-1858	SSCI
DEVELOPMENT GROWTH & DIFFERENTIATION	0012-1592	SCIE	DEVELOPMENT GROWTH & DIFFERENTIATION
DEVELOPMENTAL BIOLOGY	0012-1606	SCIE	DEVELOPMENTAL BIOLOGY
DEVELOPMENTAL MEDICINE AND CHILD NEUROLOGY	0012-1622	SCIE	DEVELOPMENTAL MEDICINE AND CHILD NEUROLOGY
DEVELOPMENTAL PSYCHOBIOLOGY	0012-1630	SCIE	DEVELOPMENTAL PSYCHOBIOLOGY
J PUBLIC ECON	0047-2727	SSCI
J PUBLIC HEALTH MAN	1078-4659	SSCI
DIABETES	0012-1797	SCIE	DIABETES	OAJ	American Diabetes Association
DIABETOLOGIA	0012-186X	SCIE	DIABETOLOGIA
DIGESTION	0012-2823	SCIE	DIGESTION
DISCRETE MATHEMATICS	0012-365X	SCIE	DISCRETE MATHEMATICS
CHEST	0012-3692	SCIE	CHEST
DISEASES OF THE COLON & RECTUM	0012-3706	SCIE	DISEASES OF THE COLON & RECTUM
DOCUMENTA OPHTHALMOLOGICA	0012-4486	SCIE	DOCUMENTA OPHTHALMOLOGICA
DOKLADY CHEMISTRY	0012-5008	SCIE	DOKLADY CHEMISTRY
DRUGS	0012-6667	SCIE	DRUGS
DUKE MATHEMATICAL JOURNAL	0012-7094	SCIE	DUKE MATHEMATICAL JOURNAL
EDN	0012-7515	SCIE	EDN
EARTH AND PLANETARY SCIENCE LETTERS	0012-821X	SCIE	EARTH AND PLANETARY SCIENCE LETTERS
EARTH-SCIENCE REVIEWS	0012-8252	SCIE	EARTH-SCIENCE REVIEWS
ANNALES SCIENTIFIQUES DE L ECOLE NORMALE SUPERIEURE	0012-9593	SCIE	ANNALES SCIENTIFIQUES DE L ECOLE NORMALE SUPERIEURE
ECOLOGICAL MONOGRAPHS	0012-9615	SCIE	ECOLOGICAL MONOGRAPHS
ECOLOGY	0012-9658	SCIE	ECOLOGY
J PUBLIC POLICY	0143-814X	SSCI
J PUBLIC POLICY MARK	0743-9156	SSCI
ECONOMIC BOTANY	0013-0001	SCIE	ECONOMIC BOTANY
J QUANT CRIMINOL	0748-4518	SSCI
J REAL ESTATE FINANC	0895-5638	SSCI
J REAL ESTATE RES	0896-5803	SSCI
J REFUG STUD	0951-6328	SSCI
J REGIONAL SCI	0022-4146	SSCI
J REGUL ECON	0922-680X	SSCI
J REHABIL	0022-4154	SSCI
J REPROD INFANT PSYC	0264-6838	SSCI
PROCEEDINGS OF THE EDINBURGH MATHEMATICAL SOCIETY	0013-0915	SCIE	PROCEEDINGS OF THE EDINBURGH MATHEMATICAL SOCIETY
J RES ADOLESCENCE	1050-8392	SSCI
J RETAILING	0022-4359	SSCI
EDUC LEADERSHIP	0013-1784	SSCI
EDUC RESEARCHER	0013-189X	SSCI
EDUC REV	0013-1911	SSCI
EDUC STUD MATH	0013-1954	SSCI
JOURNAL OF THE ELECTROCHEMICAL SOCIETY	0013-4651	SCIE	JOURNAL OF THE ELECTROCHEMICAL SOCIETY
ELECTROCHIMICA ACTA	0013-4686	SCIE	ELECTROCHIMICA ACTA
ELECTRONICS LETTERS	0013-5194	SCIE	ELECTRONICS LETTERS
BIOMEDICAL ENGINEERING-BIOMEDIZINISCHE TECHNIK	0013-5585	SCIE	BIOMEDICAL ENGINEERING-BIOMEDIZINISCHE TECHNIK
ELEM SCHOOL J	0013-5984	SSCI
ENCEPHALE-REVUE DE PSYCHIATRIE CLINIQUE BIOLOGIQUE ET THERAPEUTIQUE	0013-7006	SCIE	ENCEPHALE-REVUE DE PSYCHIATRIE CLINIQUE BIOLOGIQUE ET THERAPEUTIQUE
ENDOCRINOLOGY	0013-7227	SCIE	ENDOCRINOLOGY
ENDOSCOPY	0013-726X	SCIE	ENDOSCOPY
ENGINEERING FRACTURE MECHANICS	0013-7944	SCIE	ENGINEERING FRACTURE MECHANICS
ENGINEERING GEOLOGY	0013-7952	SCIE	ENGINEERING GEOLOGY
ENGINEERING JOURNAL-AMERICAN INSTITUTE OF STEEL CONSTRUCTION	0013-8029	SCIE	ENGINEERING JOURNAL-AMERICAN INSTITUTE OF STEEL CONSTRUCTION
ELH	0013-8304	AHCI
ENTOMOLOGIA EXPERIMENTALIS ET APPLICATA	0013-8703	SCIE	ENTOMOLOGIA EXPERIMENTALIS ET APPLICATA
ENTOMOLOGICAL NEWS	0013-872X	SCIE	ENTOMOLOGICAL NEWS
ANNALS OF THE ENTOMOLOGICAL SOCIETY OF AMERICA	0013-8746	SCIE	ANNALS OF THE ENTOMOLOGICAL SOCIETY OF AMERICA
PROCEEDINGS OF THE ENTOMOLOGICAL SOCIETY OF WASHINGTON	0013-8797	SCIE	PROCEEDINGS OF THE ENTOMOLOGICAL SOCIETY OF WASHINGTON
ENVIRONMENT	0013-9157	SSCI
J RISK UNCERTAINTY	0895-5646	SSCI
ENVIRONMENTAL RESEARCH	0013-9351	SCIE	ENVIRONMENTAL RESEARCH
ENVIRONMENTAL SCIENCE & TECHNOLOGY	0013-936X	SCIE	ENVIRONMENTAL SCIENCE & TECHNOLOGY
EPILEPSIA	0013-9580	SCIE	EPILEPSIA
J RISK RES	1366-9877	SSCI
ETHICS	0014-1704	SSCI
EUPHYTICA	0014-2336	SCIE	EUPHYTICA
REVISTA CLINICA ESPANOLA	0014-2565	SCIE	REVISTA CLINICA ESPANOLA
J RURAL STUD	0743-0167	SSCI
EUROPEAN JOURNAL OF CLINICAL INVESTIGATION	0014-2972	SCIE	EUROPEAN JOURNAL OF CLINICAL INVESTIGATION
EUROPEAN JOURNAL OF IMMUNOLOGY	0014-2980	SCIE	EUROPEAN JOURNAL OF IMMUNOLOGY
EUROPEAN JOURNAL OF PHARMACOLOGY	0014-2999	SCIE	EUROPEAN JOURNAL OF PHARMACOLOGY
EUROPEAN NEUROLOGY	0014-3022	SCIE	EUROPEAN NEUROLOGY
EUROPEAN POLYMER JOURNAL	0014-3057	SCIE	EUROPEAN POLYMER JOURNAL
POTATO RESEARCH	0014-3065	SCIE	POTATO RESEARCH
EUROPEAN SURGICAL RESEARCH	0014-312X	SCIE	EUROPEAN SURGICAL RESEARCH
EVOLUTION	0014-3820	SCIE	EVOLUTION
EXCEPT CHILDREN	0014-4029	SSCI
EXPERIMENTAL AGRICULTURE	0014-4797	SCIE	EXPERIMENTAL AGRICULTURE
EXPERIMENTAL AND MOLECULAR PATHOLOGY	0014-4800	SCIE	EXPERIMENTAL AND MOLECULAR PATHOLOGY
EXPERIMENTAL BRAIN RESEARCH	0014-4819	SCIE	EXPERIMENTAL BRAIN RESEARCH
EXPERIMENTAL CELL RESEARCH	0014-4827	SCIE	EXPERIMENTAL CELL RESEARCH
EXPERIMENTAL EYE RESEARCH	0014-4835	SCIE	EXPERIMENTAL EYE RESEARCH
EXPERIMENTAL MECHANICS	0014-4851	SCIE	EXPERIMENTAL MECHANICS
EXPERIMENTAL NEUROLOGY	0014-4886	SCIE	EXPERIMENTAL NEUROLOGY
EXPERIMENTAL PARASITOLOGY	0014-4894	SCIE	EXPERIMENTAL PARASITOLOGY
FEBS LETTERS	0014-5793	SCIE	FEBS LETTERS
FERROELECTRICS	0015-0193	SCIE	FERROELECTRICS
FERTILITY AND STERILITY	0015-0282	SCIE	FERTILITY AND STERILITY
FILTRATION & SEPARATION	0015-1882	SCIE	FILTRATION & SEPARATION
FIRE TECHNOLOGY	0015-2684	SCIE	FIRE TECHNOLOGY
FLEISCHWIRTSCHAFT	0015-363X	SCIE	FLEISCHWIRTSCHAFT
FLORIDA ENTOMOLOGIST	0015-4040	SCIE	FLORIDA ENTOMOLOGIST	OAJ	Florida Entomological Society
FLUORIDE	0015-4725	SCIE	FLUORIDE	OAJ	The International Society for Fluoride Research
FOCUS EXCEPT CHILD	0015-511X	SSCI
FOLIA BIOLOGICA	0015-5500	SCIE	FOLIA BIOLOGICA
FOLIA MICROBIOLOGICA	0015-5632	SCIE	FOLIA MICROBIOLOGICA
FOLIA MORPHOLOGICA	0015-5659	SCIE	FOLIA MORPHOLOGICA
FOLIA PARASITOLOGICA	0015-5683	SCIE	FOLIA PARASITOLOGICA
FOLIA PRIMATOLOGICA	0015-5713	SCIE	FOLIA PRIMATOLOGICA
FOOD HYGIENE AND SAFETY SCIENCE	0015-6426	SCIE	FOOD HYGIENE AND SAFETY SCIENCE
FOOD TECHNOLOGY	0015-6639	SCIE	FOOD TECHNOLOGY
J SERV RES-US	1094-6705	SSCI
J SERV MARK	0887-6045	SSCI
FOREST PRODUCTS JOURNAL	0015-7473	SCIE	FOREST PRODUCTS JOURNAL
FOREST SCIENCE	0015-749X	SCIE	FOREST SCIENCE
FORESTRY	0015-752X	SCIE	FORESTRY
FORESTRY CHRONICLE	0015-7546	SCIE	FORESTRY CHRONICLE
FORTSCHRITTE DER PHYSIK-PROGRESS OF PHYSICS	0015-8208	SCIE	FORTSCHRITTE DER PHYSIK-PROGRESS OF PHYSICS
FOUNDATIONS OF PHYSICS	0015-9018	SCIE	FOUNDATIONS OF PHYSICS
JOURNAL OF THE FRANKLIN INSTITUTE-ENGINEERING AND APPLIED MATHEMATICS	0016-0032	SCIE	JOURNAL OF THE FRANKLIN INSTITUTE-ENGINEERING AND APPLIED MATHEMATICS
FUEL	0016-2361	SCIE	FUEL
FUNDAMENTA MATHEMATICAE	0016-2736	SCIE	FUNDAMENTA MATHEMATICAE
J SEX MARITAL THER	0092-623X	SSCI
GACETA MEDICA DE MEXICO	0016-3813	SCIE	GACETA MEDICA DE MEXICO
GASTROENTEROLOGY	0016-5085	SCIE	GASTROENTEROLOGY
GASTROINTESTINAL ENDOSCOPY	0016-5107	SCIE	GASTROINTESTINAL ENDOSCOPY
GEBURTSHILFE UND FRAUENHEILKUNDE	0016-5751	SCIE	GEBURTSHILFE UND FRAUENHEILKUNDE
GENERAL AND COMPARATIVE ENDOCRINOLOGY	0016-6480	SCIE	GENERAL AND COMPARATIVE ENDOCRINOLOGY
GENETICA	0016-6707	SCIE	GENETICA
J SMALL BUS MANAGE	0047-2778	SSCI
GEOBIOS	0016-6995	SCIE	GEOBIOS
GEOCHEMICAL JOURNAL	0016-7002	SCIE	GEOCHEMICAL JOURNAL
GEOCHEMISTRY INTERNATIONAL	0016-7029	SCIE	GEOCHEMISTRY INTERNATIONAL
GEOCHIMICA ET COSMOCHIMICA ACTA	0016-7037	SCIE	GEOCHIMICA ET COSMOCHIMICA ACTA
GEODERMA	0016-7061	SCIE	GEODERMA
GEOFORUM	0016-7185	SSCI
J SOC CLIN PSYCHOL	0736-7236	SSCI
J SOC PERS RELAT	0265-4075	SSCI
J SOC HIST	0022-4529	SSCI
J SOC POLICY	0047-2794	SSCI
GEOLOGICAL MAGAZINE	0016-7568	SCIE	GEOLOGICAL MAGAZINE
GEOLOGICAL SOCIETY OF AMERICA BULLETIN	0016-7606	SCIE	GEOLOGICAL SOCIETY OF AMERICA BULLETIN
JOURNAL OF THE GEOLOGICAL SOCIETY OF INDIA	0016-7622	SCIE	JOURNAL OF THE GEOLOGICAL SOCIETY OF INDIA
J SOC WORK EDUC	1043-7797	SSCI
JOURNAL OF THE GEOLOGICAL SOCIETY	0016-7649	SCIE	JOURNAL OF THE GEOLOGICAL SOCIETY
GEOMAGNETISM AND AERONOMY	0016-7932	SCIE	GEOMAGNETISM AND AERONOMY
GEOPHYSICAL PROSPECTING	0016-8025	SCIE	GEOPHYSICAL PROSPECTING
GEOPHYSICS	0016-8033	SCIE	GEOPHYSICS
GEOTECHNIQUE	0016-8505	SCIE	GEOTECHNIQUE
GERONTOLOGIST	0016-9013	SSCI
GIFTED CHILD QUART	0016-9862	SSCI
GINEKOLOGIA POLSKA	0017-0011	SCIE	GINEKOLOGIA POLSKA
GLASGOW MATHEMATICAL JOURNAL	0017-0895	SCIE	GLASGOW MATHEMATICAL JOURNAL
GLASNIK MATEMATICKI	0017-095X	SCIE	GLASNIK MATEMATICKI
GRANA	0017-3134	SCIE	GRANA
GROUND WATER	0017-467X	SCIE	GROUND WATER
GUT	0017-5749	SCIE	GUT
HNO	0017-6192	SCIE	HNO
HARVARD BUS REV	0017-8012	SSCI
HAUTARZT	0017-8470	SCIE	HAUTARZT
HEADACHE	0017-8748	SCIE	HEADACHE
HEALTH PHYSICS	0017-9078	SCIE	HEALTH PHYSICS
HEALTH SERV RES	0017-9124	SSCI
INTERNATIONAL JOURNAL OF HEAT AND MASS TRANSFER	0017-9310	SCIE	INTERNATIONAL JOURNAL OF HEAT AND MASS TRANSFER
HELVETICA CHIMICA ACTA	0018-019X	SCIE	HELVETICA CHIMICA ACTA
HEREDITAS	0018-0661	SCIE	HEREDITAS	OAJ	Blackwell
HEREDITY	0018-067X	SCIE	HEREDITY
HERPETOLOGICA	0018-0831	SCIE	HERPETOLOGICA
HIGH ENERGY CHEMISTRY	0018-1439	SCIE	HIGH ENERGY CHEMISTRY
HIGH TEMPERATURES-HIGH PRESSURES	0018-1544	SCIE	HIGH TEMPERATURES-HIGH PRESSURES
HIGH EDUC	0018-1560	SSCI
HISTORICAL JOURNAL	0018-246X	AHCI
J SPEECH LANG HEAR R	1092-4388	SSCI
HOLZFORSCHUNG	0018-3830	SCIE	HOLZFORSCHUNG
HORMONE AND METABOLIC RESEARCH	0018-5043	SCIE	HORMONE AND METABOLIC RESEARCH
HORMONES AND BEHAVIOR	0018-506X	SCIE	HORMONES AND BEHAVIOR
HORTSCIENCE	0018-5345	SCIE	HORTSCIENCE
HOUILLE BLANCHE-REVUE INTERNATIONALE DE L EAU	0018-6368	SCIE	HOUILLE BLANCHE-REVUE INTERNATIONALE DE L EAU
HUM BIOL	0018-7143	SSCI
J SPORT MANAGE	0888-4773	SSCI
J SPORT ECON	1527-0025	SSCI
JOURNAL OF STATISTICAL PLANNING AND INFERENCE	0378-3758	SCIE	JOURNAL OF STATISTICAL PLANNING AND INFERENCE
HYDROBIOLOGIA	0018-8158	SCIE	HYDROBIOLOGIA
IBM JOURNAL OF RESEARCH AND DEVELOPMENT	0018-8646	SCIE	IBM JOURNAL OF RESEARCH AND DEVELOPMENT
JOURNAL OF STORED PRODUCTS RESEARCH	0022-474X	SCIE	JOURNAL OF STORED PRODUCTS RESEARCH
COMPUTER	0018-9162	SCIE	COMPUTER
IEEE JOURNAL OF QUANTUM ELECTRONICS	0018-9197	SCIE	IEEE JOURNAL OF QUANTUM ELECTRONICS
IEEE JOURNAL OF SOLID-STATE CIRCUITS	0018-9200	SCIE	IEEE JOURNAL OF SOLID-STATE CIRCUITS
PROCEEDINGS OF THE IEEE	0018-9219	SCIE	PROCEEDINGS OF THE IEEE
IEEE TRANSACTIONS ON AEROSPACE AND ELECTRONIC SYSTEMS	0018-9251	SCIE	IEEE TRANSACTIONS ON AEROSPACE AND ELECTRONIC SYSTEMS
IEEE TRANSACTIONS ON ANTENNAS AND PROPAGATION	0018-926X	SCIE	IEEE TRANSACTIONS ON ANTENNAS AND PROPAGATION
IEEE TRANSACTIONS ON AUTOMATIC CONTROL	0018-9286	SCIE	IEEE TRANSACTIONS ON AUTOMATIC CONTROL
IEEE TRANSACTIONS ON BIOMEDICAL ENGINEERING	0018-9294	SCIE	IEEE TRANSACTIONS ON BIOMEDICAL ENGINEERING
IEEE TRANSACTIONS ON BROADCASTING	0018-9316	SCIE	IEEE TRANSACTIONS ON BROADCASTING
IEEE TRANSACTIONS ON COMPUTERS	0018-9340	SCIE	IEEE TRANSACTIONS ON COMPUTERS
IEEE TRANSACTIONS ON EDUCATION	0018-9359	SCIE	IEEE TRANSACTIONS ON EDUCATION
IEEE TRANSACTIONS ON ELECTROMAGNETIC COMPATIBILITY	0018-9375	SCIE	IEEE TRANSACTIONS ON ELECTROMAGNETIC COMPATIBILITY
IEEE TRANSACTIONS ON ELECTRON DEVICES	0018-9383	SCIE	IEEE TRANSACTIONS ON ELECTRON DEVICES
J STRATEGIC INF SYST	0963-8687	SSCI
IEEE TRANSACTIONS ON INFORMATION THEORY	0018-9448	SCIE	IEEE TRANSACTIONS ON INFORMATION THEORY
IEEE TRANSACTIONS ON INSTRUMENTATION AND MEASUREMENT	0018-9456	SCIE	IEEE TRANSACTIONS ON INSTRUMENTATION AND MEASUREMENT
IEEE TRANSACTIONS ON MAGNETICS	0018-9464	SCIE	IEEE TRANSACTIONS ON MAGNETICS
IEEE TRANSACTIONS ON MICROWAVE THEORY AND TECHNIQUES	0018-9480	SCIE	IEEE TRANSACTIONS ON MICROWAVE THEORY AND TECHNIQUES
IEEE TRANSACTIONS ON NUCLEAR SCIENCE	0018-9499	SCIE	IEEE TRANSACTIONS ON NUCLEAR SCIENCE
IEEE TRANSACTIONS ON RELIABILITY	0018-9529	SCIE	IEEE TRANSACTIONS ON RELIABILITY
IEEE TRANSACTIONS ON VEHICULAR TECHNOLOGY	0018-9545	SCIE	IEEE TRANSACTIONS ON VEHICULAR TECHNOLOGY
ISA TRANSACTIONS	0019-0578	SCIE	ISA TRANSACTIONS
IBIS	0019-1019	SCIE	IBIS
ICARUS	0019-1035	SCIE	ICARUS
IDEGGYOGYASZATI SZEMLE-CLINICAL NEUROSCIENCE	0019-1442	SCIE	IDEGGYOGYASZATI SZEMLE-CLINICAL NEUROSCIENCE
ILLINOIS JOURNAL OF MATHEMATICS	0019-2082	SCIE	ILLINOIS JOURNAL OF MATHEMATICS
IMMUNOLOGY	0019-2805	SCIE	IMMUNOLOGY
INDAGATIONES MATHEMATICAE-NEW SERIES	0019-3577	SCIE	INDAGATIONES MATHEMATICAE-NEW SERIES
JOURNAL OF THE INDIAN CHEMICAL SOCIETY	0019-4522	SCIE	JOURNAL OF THE INDIAN CHEMICAL SOCIETY
INDIAN JOURNAL OF EXPERIMENTAL BIOLOGY	0019-5189	SCIE	INDIAN JOURNAL OF EXPERIMENTAL BIOLOGY	OAJ	NISCAIR
INDIAN JOURNAL OF GENETICS AND PLANT BREEDING	0019-5200	SCIE	INDIAN JOURNAL OF GENETICS AND PLANT BREEDING
INDIAN JOURNAL OF ORTHOPAEDICS	0019-5413	SCIE	INDIAN JOURNAL OF ORTHOPAEDICS	OAJ	Medknow Publications
INDIAN JOURNAL OF PEDIATRICS	0019-5456	SCIE	INDIAN JOURNAL OF PEDIATRICS
INDIAN JOURNAL OF PURE & APPLIED MATHEMATICS	0019-5588	SCIE	INDIAN JOURNAL OF PURE & APPLIED MATHEMATICS
INDIAN JOURNAL OF PURE & APPLIED PHYSICS	0019-5596	SCIE	INDIAN JOURNAL OF PURE & APPLIED PHYSICS	OAJ	NISCAIR
INDIAN PEDIATRICS	0019-6061	SCIE	INDIAN PEDIATRICS	OAJ	Indian Academy of Pediatrics
INDUSTRIAL HEALTH	0019-8366	SCIE	INDUSTRIAL HEALTH	OAJ	National Institute of Occupational Safety and Health
J SUPPLY CHAIN MANAG	1523-2409	SSCI
INFECTION AND IMMUNITY	0019-9567	SCIE	INFECTION AND IMMUNITY
INFORMATION PROCESSING LETTERS	0020-0190	SCIE	INFORMATION PROCESSING LETTERS
INFORMATION SCIENCES	0020-0255	SCIE	INFORMATION SCIENCES
RESPIRATORY CARE	0020-1324	SCIE	RESPIRATORY CARE
INJURY-INTERNATIONAL JOURNAL OF THE CARE OF THE INJURED	0020-1383	SCIE	INJURY-INTERNATIONAL JOURNAL OF THE CARE OF THE INJURED
INORGANIC CHEMISTRY	0020-1669	SCIE	INORGANIC CHEMISTRY
INORGANIC MATERIALS	0020-1685	SCIE	INORGANIC MATERIALS
INORGANICA CHIMICA ACTA	0020-1693	SCIE	INORGANICA CHIMICA ACTA
INSECTES SOCIAUX	0020-1812	SCIE	INSECTES SOCIAUX
ANNALS OF THE INSTITUTE OF STATISTICAL MATHEMATICS	0020-3157	SCIE	ANNALS OF THE INSTITUTE OF STATISTICAL MATHEMATICS
INSTR SCI	0020-4277	SSCI
INSTRUMENTS AND EXPERIMENTAL TECHNIQUES	0020-4412	SCIE	INSTRUMENTS AND EXPERIMENTAL TECHNIQUES
INTERNATIONAL DENTAL JOURNAL	0020-6539	SCIE	INTERNATIONAL DENTAL JOURNAL
J TECHNOL TRANSFER	0892-9912	SSCI
J ACAD MARKET SCI	0092-0703	SSCI
INTERNATIONAL GEOLOGY REVIEW	0020-6814	SCIE	INTERNATIONAL GEOLOGY REVIEW
INTERNATIONAL JOURNAL OF BIOMETEOROLOGY	0020-7128	SCIE	INTERNATIONAL JOURNAL OF BIOMETEOROLOGY
INTERNATIONAL JOURNAL OF CANCER	0020-7136	SCIE	INTERNATIONAL JOURNAL OF CANCER
INTERNATIONAL JOURNAL OF COMPUTER MATHEMATICS	0020-7160	SCIE	INTERNATIONAL JOURNAL OF COMPUTER MATHEMATICS
INTERNATIONAL JOURNAL OF CONTROL	0020-7179	SCIE	INTERNATIONAL JOURNAL OF CONTROL
INTERNATIONAL JOURNAL OF ELECTRONICS	0020-7217	SCIE	INTERNATIONAL JOURNAL OF ELECTRONICS
INTERNATIONAL JOURNAL OF ENGINEERING SCIENCE	0020-7225	SCIE	INTERNATIONAL JOURNAL OF ENGINEERING SCIENCE
INTERNATIONAL JOURNAL OF GYNECOLOGY & OBSTETRICS	0020-7292	SCIE	INTERNATIONAL JOURNAL OF GYNECOLOGY & OBSTETRICS
INT J HEALTH SERV	0020-7314	SSCI
INTERNATIONAL JOURNAL OF MECHANICAL SCIENCES	0020-7403	SCIE	INTERNATIONAL JOURNAL OF MECHANICAL SCIENCES
INTERNATIONAL JOURNAL OF NEUROSCIENCE	0020-7454	SCIE	INTERNATIONAL JOURNAL OF NEUROSCIENCE
INTERNATIONAL JOURNAL OF NON-LINEAR MECHANICS	0020-7462	SCIE	INTERNATIONAL JOURNAL OF NON-LINEAR MECHANICS
INT J NURS STUD	0020-7489	SSCI
INTERNATIONAL JOURNAL FOR PARASITOLOGY	0020-7519	SCIE	INTERNATIONAL JOURNAL FOR PARASITOLOGY
JOURNAL OF THE AMERICAN ANIMAL HOSPITAL ASSOCIATION	0587-2871	SCIE	JOURNAL OF THE AMERICAN ANIMAL HOSPITAL ASSOCIATION
JOURNAL OF THE AMERICAN COLLEGE OF NUTRITION	0731-5724	SCIE	JOURNAL OF THE AMERICAN COLLEGE OF NUTRITION
INTERNATIONAL JOURNAL OF QUANTUM CHEMISTRY	0020-7608	SCIE	INTERNATIONAL JOURNAL OF QUANTUM CHEMISTRY
INT J SOC PSYCHIATR	0020-7640	SSCI
INTERNATIONAL JOURNAL OF SOLIDS AND STRUCTURES	0020-7683	SCIE	INTERNATIONAL JOURNAL OF SOLIDS AND STRUCTURES
INTERNATIONAL JOURNAL OF SYSTEMS SCIENCE	0020-7721	SCIE	INTERNATIONAL JOURNAL OF SYSTEMS SCIENCE
INTERNATIONAL JOURNAL OF THEORETICAL PHYSICS	0020-7748	SCIE	INTERNATIONAL JOURNAL OF THEORETICAL PHYSICS
INT NURS REV	0020-8132	SSCI
INTERNATIONAL SURGERY	0020-8868	SCIE	INTERNATIONAL SURGERY
INVENTIONES MATHEMATICAE	0020-9910	SCIE	INVENTIONES MATHEMATICAE
INVESTIGATIVE RADIOLOGY	0020-9996	SCIE	INVESTIGATIVE RADIOLOGY
IRISH JOURNAL OF MEDICAL SCIENCE	0021-1265	SCIE	IRISH JOURNAL OF MEDICAL SCIENCE
TETSU TO HAGANE-JOURNAL OF THE IRON AND STEEL INSTITUTE OF JAPAN	0021-1575	SCIE	TETSU TO HAGANE-JOURNAL OF THE IRON AND STEEL INSTITUTE OF JAPAN
ISIS	0021-1753	SSCI
ISRAEL JOURNAL OF CHEMISTRY	0021-2148	SCIE	ISRAEL JOURNAL OF CHEMISTRY
ISRAEL JOURNAL OF MATHEMATICS	0021-2172	SCIE	ISRAEL JOURNAL OF MATHEMATICS
ANNALI DELL ISTITUTO SUPERIORE DI SANITA	0021-2571	SCIE	ANNALI DELL ISTITUTO SUPERIORE DI SANITA	OAJ	Kurtis srl
JARQ-JAPAN AGRICULTURAL RESEARCH QUARTERLY	0021-3551	SCIE	JARQ-JAPAN AGRICULTURAL RESEARCH QUARTERLY
JETP LETTERS	0021-3640	SCIE	JETP LETTERS
JOURNAL OF THE JAPAN INSTITUTE OF METALS	0021-4876	SCIE	JOURNAL OF THE JAPAN INSTITUTE OF METALS
JAPANESE JOURNAL OF APPLIED ENTOMOLOGY AND ZOOLOGY	0021-4914	SCIE	JAPANESE JOURNAL OF APPLIED ENTOMOLOGY AND ZOOLOGY
JAPANESE JOURNAL OF OPHTHALMOLOGY	0021-5155	SCIE	JAPANESE JOURNAL OF OPHTHALMOLOGY
NIPPON SUISAN GAKKAISHI	0021-5392	SCIE	NIPPON SUISAN GAKKAISHI
JORNAL DE PEDIATRIA	0021-7557	SCIE	JORNAL DE PEDIATRIA	OAJ	Sociedade Brasileira de Pediatria
JOURNAL D ANALYSE MATHEMATIQUE	0021-7670	SCIE	JOURNAL D ANALYSE MATHEMATIQUE
JOURNAL DE MATHEMATIQUES PURES ET APPLIQUEES	0021-7824	SCIE	JOURNAL DE MATHEMATIQUES PURES ET APPLIQUEES
J RES MATH EDUC	0021-8251	SSCI
J AM MED INFORM ASSN	1067-5027	SSCI
JOURNAL OF THE AMERICAN ORIENTAL SOCIETY	0003-0279	AHCI
J AM PLANN ASSOC	0194-4363	SSCI
JOURNAL OF ADHESION	0021-8464	SCIE	JOURNAL OF ADHESION
JOURNAL OF AEROSOL SCIENCE	0021-8502	SCIE	JOURNAL OF AEROSOL SCIENCE
JOURNAL OF AGRICULTURAL AND FOOD CHEMISTRY	0021-8561	SCIE	JOURNAL OF AGRICULTURAL AND FOOD CHEMISTRY
JOURNAL OF AGRICULTURAL SCIENCE	0021-8596	SCIE	JOURNAL OF AGRICULTURAL SCIENCE
JOURNAL OF AIRCRAFT	0021-8669	SCIE	JOURNAL OF AIRCRAFT
JOURNAL OF ALGEBRA	0021-8693	SCIE	JOURNAL OF ALGEBRA
J AM HIST	0021-8723	SSCI
JOURNAL OF ANATOMY	0021-8782	SCIE	JOURNAL OF ANATOMY
JOURNAL OF ANIMAL ECOLOGY	0021-8790	SCIE	JOURNAL OF ANIMAL ECOLOGY
JOURNAL OF ANIMAL SCIENCE	0021-8812	SCIE	JOURNAL OF ANIMAL SCIENCE
JOURNAL OF ANTIBIOTICS	0021-8820	SCIE	JOURNAL OF ANTIBIOTICS
J AM SOC INF SCI TEC	1532-2882	SSCI
JOURNAL OF THE AMERICAN STATISTICAL ASSOCIATION	0162-1459	SCIE	JOURNAL OF THE AMERICAN STATISTICAL ASSOCIATION
JOURNAL OF APPLIED CRYSTALLOGRAPHY	0021-8898	SCIE	JOURNAL OF APPLIED CRYSTALLOGRAPHY
JOURNAL OF APPLIED ECOLOGY	0021-8901	SCIE	JOURNAL OF APPLIED ECOLOGY
JOURNAL OF APPLIED ELECTROCHEMISTRY	0021-891X	SCIE	JOURNAL OF APPLIED ELECTROCHEMISTRY
PMM JOURNAL OF APPLIED MATHEMATICS AND MECHANICS	0021-8928	SCIE	PMM JOURNAL OF APPLIED MATHEMATICS AND MECHANICS
JOURNAL OF APPLIED MECHANICS-TRANSACTIONS OF THE ASME	0021-8936	SCIE	JOURNAL OF APPLIED MECHANICS-TRANSACTIONS OF THE ASME
JOURNAL OF APPLIED MECHANICS AND TECHNICAL PHYSICS	0021-8944	SCIE	JOURNAL OF APPLIED MECHANICS AND TECHNICAL PHYSICS
JOURNAL OF APPLIED PHYSICS	0021-8979	SCIE	JOURNAL OF APPLIED PHYSICS
JOURNAL OF APPLIED POLYMER SCIENCE	0021-8995	SCIE	JOURNAL OF APPLIED POLYMER SCIENCE
JOURNAL OF APPLIED PROBABILITY	0021-9002	SCIE	JOURNAL OF APPLIED PROBABILITY
JOURNAL OF APPLIED SPECTROSCOPY	0021-9037	SCIE	JOURNAL OF APPLIED SPECTROSCOPY
JOURNAL OF APPROXIMATION THEORY	0021-9045	SCIE	JOURNAL OF APPROXIMATION THEORY
JOURNAL OF THE ASTRONAUTICAL SCIENCES	0021-9142	SCIE	JOURNAL OF THE ASTRONAUTICAL SCIENCES
ATHEROSCLEROSIS	0021-9150	SCIE	ATHEROSCLEROSIS
JOURNAL OF BACTERIOLOGY	0021-9193	SCIE	JOURNAL OF BACTERIOLOGY
JOURNAL OF BIOCHEMISTRY	0021-924X	SCIE	JOURNAL OF BIOCHEMISTRY
JOURNAL OF BIOLOGICAL CHEMISTRY	0021-9258	SCIE	JOURNAL OF BIOLOGICAL CHEMISTRY
JOURNAL OF BIOLOGICAL EDUCATION	0021-9266	SCIE	JOURNAL OF BIOLOGICAL EDUCATION
JOURNAL OF BIOMECHANICS	0021-9290	SCIE	JOURNAL OF BIOMECHANICS
J BIOSOC SCI	0021-9320	SSCI
JOURNAL OF BONE AND JOINT SURGERY-AMERICAN VOLUME	0021-9355	SCIE	JOURNAL OF BONE AND JOINT SURGERY-AMERICAN VOLUME
J ASIA PAC ECON	1354-7860	SSCI
J ASSOC INF SYST	1536-9323	SSCI
JOURNAL OF CANADIAN PETROLEUM TECHNOLOGY	0021-9487	SCIE	JOURNAL OF CANADIAN PETROLEUM TECHNOLOGY
JOURNAL OF CARDIOVASCULAR SURGERY	0021-9509	SCIE	JOURNAL OF CARDIOVASCULAR SURGERY
JOURNAL OF CATALYSIS	0021-9517	SCIE	JOURNAL OF CATALYSIS
JOURNAL OF CELL BIOLOGY	0021-9525	SCIE	JOURNAL OF CELL BIOLOGY	OAJ	The Rockefeller University Press
JOURNAL OF CELL SCIENCE	0021-9533	SCIE	JOURNAL OF CELL SCIENCE
JOURNAL OF CELLULAR PHYSIOLOGY	0021-9541	SCIE	JOURNAL OF CELLULAR PHYSIOLOGY
JOURNAL OF CELLULAR PLASTICS	0021-955X	SCIE	JOURNAL OF CELLULAR PLASTICS
JOURNAL OF CHEMICAL AND ENGINEERING DATA	0021-9568	SCIE	JOURNAL OF CHEMICAL AND ENGINEERING DATA
JOURNAL OF CHEMICAL EDUCATION	0021-9584	SCIE	JOURNAL OF CHEMICAL EDUCATION
JOURNAL OF CHEMICAL ENGINEERING OF JAPAN	0021-9592	SCIE	JOURNAL OF CHEMICAL ENGINEERING OF JAPAN
JOURNAL OF CHEMICAL PHYSICS	0021-9606	SCIE	JOURNAL OF CHEMICAL PHYSICS
JOURNAL OF CHEMICAL THERMODYNAMICS	0021-9614	SCIE	JOURNAL OF CHEMICAL THERMODYNAMICS
JOURNAL OF CHROMATOGRAPHIC SCIENCE	0021-9665	SCIE	JOURNAL OF CHROMATOGRAPHIC SCIENCE
JOURNAL OF CHROMATOGRAPHY A	0021-9673	SCIE	JOURNAL OF CHROMATOGRAPHY A
JOURNAL OF CLINICAL ENDOCRINOLOGY & METABOLISM	0021-972X	SCIE	JOURNAL OF CLINICAL ENDOCRINOLOGY & METABOLISM
JOURNAL OF CLINICAL INVESTIGATION	0021-9738	SCIE	JOURNAL OF CLINICAL INVESTIGATION
JOURNAL OF CLINICAL PATHOLOGY	0021-9746	SCIE	JOURNAL OF CLINICAL PATHOLOGY
JOURNAL OF COLLOID AND INTERFACE SCIENCE	0021-9797	SCIE	JOURNAL OF COLLOID AND INTERFACE SCIENCE
J COMMUN DISORD	0021-9924	SSCI
JOURNAL OF COMPARATIVE NEUROLOGY	0021-9967	SCIE	JOURNAL OF COMPARATIVE NEUROLOGY
JOURNAL OF COMPARATIVE PATHOLOGY	0021-9975	SCIE	JOURNAL OF COMPARATIVE PATHOLOGY
JOURNAL OF COMPOSITE MATERIALS	0021-9983	SCIE	JOURNAL OF COMPOSITE MATERIALS
JOURNAL OF COMPUTATIONAL PHYSICS	0021-9991	SCIE	JOURNAL OF COMPUTATIONAL PHYSICS
JOURNAL OF COMPUTER AND SYSTEM SCIENCES	0022-0000	SCIE	JOURNAL OF COMPUTER AND SYSTEM SCIENCES
JOURNAL OF CONCHOLOGY	0022-0019	SCIE	JOURNAL OF CONCHOLOGY
J CONTIN EDUC NURS	0022-0124	SSCI
JOURNAL OF CRYSTAL GROWTH	0022-0248	SCIE	JOURNAL OF CRYSTAL GROWTH
J CURRICULUM STUD	0022-0272	SSCI
JOURNAL OF DAIRY RESEARCH	0022-0299	SCIE	JOURNAL OF DAIRY RESEARCH
JOURNAL OF DAIRY SCIENCE	0022-0302	SCIE	JOURNAL OF DAIRY SCIENCE
JOURNAL OF DENTAL EDUCATION	0022-0337	SCIE	JOURNAL OF DENTAL EDUCATION
JOURNAL OF DENTAL RESEARCH	0022-0345	SCIE	JOURNAL OF DENTAL RESEARCH
JOURNAL OF DIFFERENTIAL EQUATIONS	0022-0396	SCIE	JOURNAL OF DIFFERENTIAL EQUATIONS
JOURNAL OF DIFFERENTIAL GEOMETRY	0022-040X	SCIE	JOURNAL OF DIFFERENTIAL GEOMETRY
JOURNAL OF DYNAMIC SYSTEMS MEASUREMENT AND CONTROL-TRANSACTIONS OF THE ASME	0022-0434	SCIE	JOURNAL OF DYNAMIC SYSTEMS MEASUREMENT AND CONTROL-TRANSACTIONS OF THE ASME
JOURNAL OF ECOLOGY	0022-0477	SCIE	JOURNAL OF ECOLOGY
JOURNAL OF ECONOMIC ENTOMOLOGY	0022-0493	SCIE	JOURNAL OF ECONOMIC ENTOMOLOGY
J EDUC RES	0022-0671	SSCI
JOURNAL OF ELECTROCARDIOLOGY	0022-0736	SCIE	JOURNAL OF ELECTROCARDIOLOGY
JOURNAL OF ENDOCRINOLOGY	0022-0795	SCIE	JOURNAL OF ENDOCRINOLOGY
JOURNAL OF ENGINEERING MATHEMATICS	0022-0833	SCIE	JOURNAL OF ENGINEERING MATHEMATICS
JOURNAL OF ENVIRONMENTAL HEALTH	0022-0892	SCIE	JOURNAL OF ENVIRONMENTAL HEALTH
JOURNAL OF EXPERIMENTAL BIOLOGY	0022-0949	SCIE	JOURNAL OF EXPERIMENTAL BIOLOGY
JOURNAL OF EXPERIMENTAL BOTANY	0022-0957	SCIE	JOURNAL OF EXPERIMENTAL BOTANY
J EXP CHILD PSYCHOL	0022-0965	SSCI
J EXP EDUC	0022-0973	SSCI
JOURNAL OF EXPERIMENTAL MARINE BIOLOGY AND ECOLOGY	0022-0981	SCIE	JOURNAL OF EXPERIMENTAL MARINE BIOLOGY AND ECOLOGY
JOURNAL OF EXPERIMENTAL MEDICINE	0022-1007	SCIE	JOURNAL OF EXPERIMENTAL MEDICINE	OAJ	The Rockefeller University Press
J EUR ECON ASSOC	1542-4766	SSCI
JOURNAL OF FISH BIOLOGY	0022-1112	SCIE	JOURNAL OF FISH BIOLOGY
JOURNAL OF FLUID MECHANICS	0022-1120	SCIE	JOURNAL OF FLUID MECHANICS
JOURNAL OF FLUORINE CHEMISTRY	0022-1139	SCIE	JOURNAL OF FLUORINE CHEMISTRY
JOURNAL OF FOOD SCIENCE	0022-1147	SCIE	JOURNAL OF FOOD SCIENCE
JOURNAL OF FOOD SCIENCE AND TECHNOLOGY-MYSORE	0022-1155	SCIE	JOURNAL OF FOOD SCIENCE AND TECHNOLOGY-MYSORE
JOURNAL OF FORENSIC SCIENCES	0022-1198	SCIE	JOURNAL OF FORENSIC SCIENCES
JOURNAL OF FORESTRY	0022-1201	SCIE	JOURNAL OF FORESTRY
JOURNAL OF FUNCTIONAL ANALYSIS	0022-1236	SCIE	JOURNAL OF FUNCTIONAL ANALYSIS
JOURNAL OF GENERAL AND APPLIED MICROBIOLOGY	0022-1260	SCIE	JOURNAL OF GENERAL AND APPLIED MICROBIOLOGY
JOURNAL OF GENERAL PHYSIOLOGY	0022-1295	SCIE	JOURNAL OF GENERAL PHYSIOLOGY	OAJ	The Rockefeller University Press
JOURNAL OF GENERAL VIROLOGY	0022-1317	SCIE	JOURNAL OF GENERAL VIROLOGY
JOURNAL OF GENETICS	0022-1333	SCIE	JOURNAL OF GENETICS	OAJ	Indian Academy of Sciences, Springer
JOURNAL OF GEOLOGY	0022-1376	SCIE	JOURNAL OF GEOLOGY
J HIST SEXUALITY	1043-4070	SSCI
JOURNAL OF HEAT TRANSFER-TRANSACTIONS OF THE ASME	0022-1481	SCIE	JOURNAL OF HEAT TRANSFER-TRANSACTIONS OF THE ASME
JOURNAL OF HELMINTHOLOGY	0022-149X	SCIE	JOURNAL OF HELMINTHOLOGY
JOURNAL OF HEREDITY	0022-1503	SCIE	JOURNAL OF HEREDITY
JOURNAL OF HERPETOLOGY	0022-1511	SCIE	JOURNAL OF HERPETOLOGY
JOURNAL OF HETEROCYCLIC CHEMISTRY	0022-152X	SCIE	JOURNAL OF HETEROCYCLIC CHEMISTRY
J HIGH EDUC	0022-1546	SSCI
JOURNAL OF HISTOCHEMISTRY & CYTOCHEMISTRY	0022-1554	SCIE	JOURNAL OF HISTOCHEMISTRY & CYTOCHEMISTRY
J JPN INT ECON	0889-1583	SSCI
JOURNAL OF HYDRAULIC RESEARCH	0022-1686	SCIE	JOURNAL OF HYDRAULIC RESEARCH
JOURNAL OF HYDROLOGY	0022-1694	SCIE	JOURNAL OF HYDROLOGY
JOURNAL OF IMMUNOLOGICAL METHODS	0022-1759	SCIE	JOURNAL OF IMMUNOLOGICAL METHODS
JOURNAL OF IMMUNOLOGY	0022-1767	SCIE	JOURNAL OF IMMUNOLOGY
JOURNAL OF INFECTIOUS DISEASES	0022-1899	SCIE	JOURNAL OF INFECTIOUS DISEASES
JOURNAL OF INSECT PHYSIOLOGY	0022-1910	SCIE	JOURNAL OF INSECT PHYSIOLOGY
JOURNAL OF INVERTEBRATE PATHOLOGY	0022-2011	SCIE	JOURNAL OF INVERTEBRATE PATHOLOGY
JOURNAL OF INVESTIGATIVE DERMATOLOGY	0022-202X	SCIE	JOURNAL OF INVESTIGATIVE DERMATOLOGY
JOURNAL OF LARYNGOLOGY AND OTOLOGY	0022-2151	SCIE	JOURNAL OF LARYNGOLOGY AND OTOLOGY
J LEARN DISABIL-US	0022-2194	SSCI
J LEISURE RES	0022-2216	SSCI
JOURNAL OF LIPID RESEARCH	0022-2275	SCIE	JOURNAL OF LIPID RESEARCH
JOURNAL OF LOW TEMPERATURE PHYSICS	0022-2291	SCIE	JOURNAL OF LOW TEMPERATURE PHYSICS
JOURNAL OF LUMINESCENCE	0022-2313	SCIE	JOURNAL OF LUMINESCENCE
JOURNAL OF MACROMOLECULAR SCIENCE PART B-PHYSICS	0022-2348	SCIE	JOURNAL OF MACROMOLECULAR SCIENCE PART B-PHYSICS
JOURNAL OF MAMMALOGY	0022-2372	SCIE	JOURNAL OF MAMMALOGY
JOURNAL OF MARINE RESEARCH	0022-2402	SCIE	JOURNAL OF MARINE RESEARCH
JOURNAL OF MATERIALS SCIENCE	0022-2461	SCIE	JOURNAL OF MATERIALS SCIENCE
JOURNAL OF MATHEMATICAL ANALYSIS AND APPLICATIONS	0022-247X	SCIE	JOURNAL OF MATHEMATICAL ANALYSIS AND APPLICATIONS
JOURNAL OF MATHEMATICAL PHYSICS	0022-2488	SCIE	JOURNAL OF MATHEMATICAL PHYSICS
J MATH PSYCHOL	0022-2496	SSCI
INDIANA UNIVERSITY MATHEMATICS JOURNAL	0022-2518	SCIE	INDIANA UNIVERSITY MATHEMATICS JOURNAL
STUDIES IN APPLIED MATHEMATICS	0022-2526	SCIE	STUDIES IN APPLIED MATHEMATICS
JOURNAL OF MEDICAL ENTOMOLOGY	0022-2585	SCIE	JOURNAL OF MEDICAL ENTOMOLOGY
JOURNAL OF MEDICAL GENETICS	0022-2593	SCIE	JOURNAL OF MEDICAL GENETICS
JOURNAL OF MEDICAL MICROBIOLOGY	0022-2615	SCIE	JOURNAL OF MEDICAL MICROBIOLOGY
JOURNAL OF MEDICINAL CHEMISTRY	0022-2623	SCIE	JOURNAL OF MEDICINAL CHEMISTRY
JOURNAL OF MEMBRANE BIOLOGY	0022-2631	SCIE	JOURNAL OF MEMBRANE BIOLOGY
JOURNAL OF MICROSCOPY	0022-2720	SCIE	JOURNAL OF MICROSCOPY
JOURNAL OF MOLECULAR AND CELLULAR CARDIOLOGY	0022-2828	SCIE	JOURNAL OF MOLECULAR AND CELLULAR CARDIOLOGY
JOURNAL OF MOLECULAR BIOLOGY	0022-2836	SCIE	JOURNAL OF MOLECULAR BIOLOGY
JOURNAL OF MOLECULAR EVOLUTION	0022-2844	SCIE	JOURNAL OF MOLECULAR EVOLUTION
JOURNAL OF MOLECULAR SPECTROSCOPY	0022-2852	SCIE	JOURNAL OF MOLECULAR SPECTROSCOPY
JOURNAL OF MOLECULAR STRUCTURE	0022-2860	SCIE	JOURNAL OF MOLECULAR STRUCTURE
JOURNAL OF NATURAL HISTORY	0022-2933	SCIE	JOURNAL OF NATURAL HISTORY
JOURNAL OF NEMATOLOGY	0022-300X	SCIE	JOURNAL OF NEMATOLOGY
J NERV MENT DIS	0022-3018	SSCI
JOURNAL OF NEUROCHEMISTRY	0022-3042	SCIE	JOURNAL OF NEUROCHEMISTRY
JOURNAL OF NEUROLOGY NEUROSURGERY AND PSYCHIATRY	0022-3050	SCIE	JOURNAL OF NEUROLOGY NEUROSURGERY AND PSYCHIATRY
JOURNAL OF NEUROPATHOLOGY AND EXPERIMENTAL NEUROLOGY	0022-3069	SCIE	JOURNAL OF NEUROPATHOLOGY AND EXPERIMENTAL NEUROLOGY
JOURNAL OF NEUROPHYSIOLOGY	0022-3077	SCIE	JOURNAL OF NEUROPHYSIOLOGY
JOURNAL OF NEUROSURGERY	0022-3085	SCIE	JOURNAL OF NEUROSURGERY
JOURNAL OF NON-CRYSTALLINE SOLIDS	0022-3093	SCIE	JOURNAL OF NON-CRYSTALLINE SOLIDS
JOURNAL OF NUCLEAR MATERIALS	0022-3115	SCIE	JOURNAL OF NUCLEAR MATERIALS
JOURNAL OF NUCLEAR SCIENCE AND TECHNOLOGY	0022-3131	SCIE	JOURNAL OF NUCLEAR SCIENCE AND TECHNOLOGY
JOURNAL OF NUMBER THEORY	0022-314X	SCIE	JOURNAL OF NUMBER THEORY
JOURNAL OF NUTRITION	0022-3166	SCIE	JOURNAL OF NUTRITION
JOURNAL OF OPTIMIZATION THEORY AND APPLICATIONS	0022-3239	SCIE	JOURNAL OF OPTIMIZATION THEORY AND APPLICATIONS
JOURNAL OF ORGANIC CHEMISTRY	0022-3263	SCIE	JOURNAL OF ORGANIC CHEMISTRY
JOURNAL OF ORGANOMETALLIC CHEMISTRY	0022-328X	SCIE	JOURNAL OF ORGANOMETALLIC CHEMISTRY
JOURNAL OF PALEONTOLOGY	0022-3360	SCIE	JOURNAL OF PALEONTOLOGY
JOURNAL OF PARASITOLOGY	0022-3395	SCIE	JOURNAL OF PARASITOLOGY
JOURNAL OF PATHOLOGY	0022-3417	SCIE	JOURNAL OF PATHOLOGY
JOURNAL OF PEDIATRIC SURGERY	0022-3468	SCIE	JOURNAL OF PEDIATRIC SURGERY
JOURNAL OF PEDIATRICS	0022-3476	SCIE	JOURNAL OF PEDIATRICS
JOURNAL OF PERIODONTAL RESEARCH	0022-3484	SCIE	JOURNAL OF PERIODONTAL RESEARCH
JOURNAL OF PERIODONTOLOGY	0022-3492	SCIE	JOURNAL OF PERIODONTOLOGY
J ROY ANTHROPOL INST	1359-0987	SSCI
JOURNAL OF PETROLOGY	0022-3530	SCIE	JOURNAL OF PETROLOGY
JOURNAL OF PHARMACEUTICAL SCIENCES	0022-3549	SCIE	JOURNAL OF PHARMACEUTICAL SCIENCES
JOURNAL OF PHARMACOLOGY AND EXPERIMENTAL THERAPEUTICS	0022-3565	SCIE	JOURNAL OF PHARMACOLOGY AND EXPERIMENTAL THERAPEUTICS
JOURNAL OF PHARMACY AND PHARMACOLOGY	0022-3573	SCIE	JOURNAL OF PHARMACY AND PHARMACOLOGY
JOURNAL OF PHILOSOPHY	0022-362X	AHCI
JOURNAL OF PHYCOLOGY	0022-3646	SCIE	JOURNAL OF PHYCOLOGY
JOURNAL OF PHYSICAL OCEANOGRAPHY	0022-3670	SCIE	JOURNAL OF PHYSICAL OCEANOGRAPHY
JOURNAL OF PHYSICS AND CHEMISTRY OF SOLIDS	0022-3697	SCIE	JOURNAL OF PHYSICS AND CHEMISTRY OF SOLIDS
JOURNAL OF PHYSICS D-APPLIED PHYSICS	0022-3727	SCIE	JOURNAL OF PHYSICS D-APPLIED PHYSICS
JOURNAL OF PHYSIOLOGY-LONDON	0022-3751	SCIE	JOURNAL OF PHYSIOLOGY-LONDON
JOURNAL OF PLASMA PHYSICS	0022-3778	SCIE	JOURNAL OF PLASMA PHYSICS
JOURNAL OF POSTGRADUATE MEDICINE	0022-3859	SCIE	JOURNAL OF POSTGRADUATE MEDICINE	OAJ	Medknow Publications
JOURNAL OF PROSTHETIC DENTISTRY	0022-3913	SCIE	JOURNAL OF PROSTHETIC DENTISTRY
J PSYCHIATR RES	0022-3956	SSCI
J PSYCHOSOM RES	0022-3999	SSCI
JOURNAL OF PUBLIC HEALTH DENTISTRY	0022-4006	SCIE	JOURNAL OF PUBLIC HEALTH DENTISTRY
JOURNAL OF PURE AND APPLIED ALGEBRA	0022-4049	SCIE	JOURNAL OF PURE AND APPLIED ALGEBRA
JOURNAL OF QUALITY TECHNOLOGY	0022-4065	SCIE	JOURNAL OF QUALITY TECHNOLOGY
JOURNAL OF QUANTITATIVE SPECTROSCOPY & RADIATIVE TRANSFER	0022-4073	SCIE	JOURNAL OF QUANTITATIVE SPECTROSCOPY & RADIATIVE TRANSFER
J RES SCI TEACH	0022-4308	SSCI
J SAFETY RES	0022-4375	SSCI
J SCHOOL HEALTH	0022-4391	SSCI
J SCHOOL PSYCHOL	0022-4405	SSCI
JOURNAL OF SCIENTIFIC & INDUSTRIAL RESEARCH	0022-4456	SCIE	JOURNAL OF SCIENTIFIC & INDUSTRIAL RESEARCH	OAJ	NISCAIR
J SEX RES	0022-4499	SSCI
JOURNAL OF SHIP RESEARCH	0022-4502	SCIE	JOURNAL OF SHIP RESEARCH
J TRANSP ECON POLICY	0022-5258	SSCI
J TRAUMA STRESS	0894-9867	SSCI
JOURNAL OF SOIL AND WATER CONSERVATION	0022-4561	SCIE	JOURNAL OF SOIL AND WATER CONSERVATION
JOURNAL OF SOLID STATE CHEMISTRY	0022-4596	SCIE	JOURNAL OF SOLID STATE CHEMISTRY
JOURNAL OF SOUND AND VIBRATION	0022-460X	SCIE	JOURNAL OF SOUND AND VIBRATION
JOURNAL OF SPACECRAFT AND ROCKETS	0022-4650	SCIE	JOURNAL OF SPACECRAFT AND ROCKETS
J SPEC EDUC	0022-4669	SSCI
JOURNAL OF SPORTS MEDICINE AND PHYSICAL FITNESS	0022-4707	SCIE	JOURNAL OF SPORTS MEDICINE AND PHYSICAL FITNESS
JOURNAL OF STATISTICAL PHYSICS	0022-4715	SCIE	JOURNAL OF STATISTICAL PHYSICS
J TRAVEL RES	0047-2875	SSCI
J URBAN AFF	0735-2166	SSCI
J URBAN ECON	0094-1190	SSCI
JOURNAL OF SURGICAL ONCOLOGY	0022-4790	SCIE	JOURNAL OF SURGICAL ONCOLOGY
JOURNAL OF SURGICAL RESEARCH	0022-4804	SCIE	JOURNAL OF SURGICAL RESEARCH
JOURNAL OF SYMBOLIC LOGIC	0022-4812	SCIE	JOURNAL OF SYMBOLIC LOGIC
J TEACH EDUC	0022-4871	SSCI
JOURNAL OF TERRAMECHANICS	0022-4898	SCIE	JOURNAL OF TERRAMECHANICS
JOURNAL OF TEXTURE STUDIES	0022-4901	SCIE	JOURNAL OF TEXTURE STUDIES
JOURNAL OF THE ATMOSPHERIC SCIENCES	0022-4928	SCIE	JOURNAL OF THE ATMOSPHERIC SCIENCES
JOURNAL OF THE HISTORY OF IDEAS	0022-5037	AHCI
J HIST MED ALL SCI	0022-5045	SSCI
JOURNAL OF THE MECHANICS AND PHYSICS OF SOLIDS	0022-5096	SCIE	JOURNAL OF THE MECHANICS AND PHYSICS OF SOLIDS
JOURNAL OF THE NEUROLOGICAL SCIENCES	0022-510X	SCIE	JOURNAL OF THE NEUROLOGICAL SCIENCES
JOURNAL OF THE SCIENCE OF FOOD AND AGRICULTURE	0022-5142	SCIE	JOURNAL OF THE SCIENCE OF FOOD AND AGRICULTURE
JOURNAL OF THEORETICAL BIOLOGY	0022-5193	SCIE	JOURNAL OF THEORETICAL BIOLOGY
JOURNAL OF THORACIC AND CARDIOVASCULAR SURGERY	0022-5223	SCIE	JOURNAL OF THORACIC AND CARDIOVASCULAR SURGERY
JOURNAL OF UROLOGY	0022-5347	SCIE	JOURNAL OF UROLOGY
JOURNAL OF VIROLOGY	0022-538X	SCIE	JOURNAL OF VIROLOGY
JOURNAL OF WILDLIFE MANAGEMENT	0022-541X	SCIE	JOURNAL OF WILDLIFE MANAGEMENT
JOURNAL OF THE KANSAS ENTOMOLOGICAL SOCIETY	0022-8567	SCIE	JOURNAL OF THE KANSAS ENTOMOLOGICAL SOCIETY
KARDIOLOGIA POLSKA	0022-9032	SCIE	KARDIOLOGIA POLSKA	OAJ	Polskie Towarzystwo Kardiologiczne
KINETICS AND CATALYSIS	0023-1584	SCIE	KINETICS AND CATALYSIS
KLINISCHE MONATSBLATTER FUR AUGENHEILKUNDE	0023-2165	SCIE	KLINISCHE MONATSBLATTER FUR AUGENHEILKUNDE
KOREA JOURNAL	0023-3900	AHCI
J URBAN PLAN D-ASCE	0733-9488	SSCI
KOREAN JOURNAL OF PARASITOLOGY	0023-4001	SCIE	KOREAN JOURNAL OF PARASITOLOGY	OAJ	The Korean Society for Parasitology
KYBERNETIKA	0023-5954	SCIE	KYBERNETIKA	OAJ	Institute of Information Theory and Automation of the ASCR
J URBAN TECHNOL	1063-0732	SSCI
JOURNAL OF THE FACULTY OF AGRICULTURE KYUSHU UNIVERSITY	0023-6152	SCIE	JOURNAL OF THE FACULTY OF AGRICULTURE KYUSHU UNIVERSITY
LWT-FOOD SCIENCE AND TECHNOLOGY	0023-6438	SCIE	LWT-FOOD SCIENCE AND TECHNOLOGY
LABORATORY ANIMALS	0023-6772	SCIE	LABORATORY ANIMALS
LABORATORY INVESTIGATION	0023-6837	SCIE	LABORATORY INVESTIGATION
LAEKNABLADID	0023-7213	SCIE	LAEKNABLADID
LANG LEARN	0023-8333	SSCI
LARYNGOSCOPE	0023-852X	SCIE	LARYNGOSCOPE
LEARN MOTIV	0023-9690	SSCI
JOURNAL OF THE LEPIDOPTERISTS SOCIETY	0024-0966	SCIE	JOURNAL OF THE LEPIDOPTERISTS SOCIETY
LETHAIA	0024-1164	SCIE	LETHAIA
LICHENOLOGIST	0024-2829	SCIE	LICHENOLOGIST
LIMNOLOGY AND OCEANOGRAPHY	0024-3590	SCIE	LIMNOLOGY AND OCEANOGRAPHY
LINEAR ALGEBRA AND ITS APPLICATIONS	0024-3795	SCIE	LINEAR ALGEBRA AND ITS APPLICATIONS
LINGUA	0024-3841	SSCI
LINGUISTICS	0024-3949	SSCI
BIOLOGICAL JOURNAL OF THE LINNEAN SOCIETY	0024-4066	SCIE	BIOLOGICAL JOURNAL OF THE LINNEAN SOCIETY
BOTANICAL JOURNAL OF THE LINNEAN SOCIETY	0024-4074	SCIE	BOTANICAL JOURNAL OF THE LINNEAN SOCIETY
J VOCAT BEHAV	0001-8791	SSCI
LIPIDS	0024-4201	SCIE	LIPIDS
LITHOS	0024-4937	SCIE	LITHOS
BULLETIN OF THE LONDON MATHEMATICAL SOCIETY	0024-6093	SCIE	BULLETIN OF THE LONDON MATHEMATICAL SOCIETY
JOURNAL OF THE LONDON MATHEMATICAL SOCIETY-SECOND SERIES	0024-6107	SCIE	JOURNAL OF THE LONDON MATHEMATICAL SOCIETY-SECOND SERIES
PROCEEDINGS OF THE LONDON MATHEMATICAL SOCIETY	0024-6115	SCIE	PROCEEDINGS OF THE LONDON MATHEMATICAL SOCIETY
JOURNAL OF WILDLIFE DISEASES	0090-3558	SCIE	JOURNAL OF WILDLIFE DISEASES
JOURNAL OF REPRODUCTIVE MEDICINE	0024-7758	SCIE	JOURNAL OF REPRODUCTIVE MEDICINE
LYMPHOLOGY	0024-7766	SCIE	LYMPHOLOGY
MACROMOLECULES	0024-9297	SCIE	MACROMOLECULES
MAGAZINE OF CONCRETE RESEARCH	0024-9831	SCIE	MAGAZINE OF CONCRETE RESEARCH
MAMMALIA	0025-1461	SCIE	MAMMALIA
J WOMEN AGING	0895-2841	SSCI
J WOMEN POLIT POLICY	1554-477X	SSCI
J WORLD BUS	1090-9516	SSCI
JOURNAL OF WORLD PREHISTORY	0892-7537	AHCI
J WORLD TRADE	1011-6702	SSCI
J YOUTH ADOLESCENCE	0047-2891	SSCI
J MASS COMMUN Q	1077-6990	SSCI
MANUSCRIPTA MATHEMATICA	0025-2611	SCIE	MANUSCRIPTA MATHEMATICA
JOURNAL OF THE MARINE BIOLOGICAL ASSOCIATION OF THE UNITED KINGDOM	0025-3154	SCIE	JOURNAL OF THE MARINE BIOLOGICAL ASSOCIATION OF THE UNITED KINGDOM
MARINE BIOLOGY	0025-3162	SCIE	MARINE BIOLOGY
MARINE GEOLOGY	0025-3227	SCIE	MARINE GEOLOGY
MARINE GEOPHYSICAL RESEARCH	0025-3235	SCIE	MARINE GEOPHYSICAL RESEARCH
MARINE POLLUTION BULLETIN	0025-326X	SCIE	MARINE POLLUTION BULLETIN
MARINE TECHNOLOGY SOCIETY JOURNAL	0025-3324	SCIE	MARINE TECHNOLOGY SOCIETY JOURNAL
MATERIALS EVALUATION	0025-5327	SCIE	MATERIALS EVALUATION
MATERIALS RESEARCH BULLETIN	0025-5408	SCIE	MATERIALS RESEARCH BULLETIN
MATHEMATICA SCANDINAVICA	0025-5521	SCIE	MATHEMATICA SCANDINAVICA
MATHEMATICAL BIOSCIENCES	0025-5564	SCIE	MATHEMATICAL BIOSCIENCES
MATHEMATICAL PROGRAMMING	0025-5610	SCIE	MATHEMATICAL PROGRAMMING
JOURNAL OF THE MATHEMATICAL SOCIETY OF JAPAN	0025-5645	SCIE	JOURNAL OF THE MATHEMATICAL SOCIETY OF JAPAN
MATHEMATICS OF COMPUTATION	0025-5718	SCIE	MATHEMATICS OF COMPUTATION
MATHEMATIKA	0025-5793	SCIE	MATHEMATIKA
MATHEMATISCHE ANNALEN	0025-5831	SCIE	MATHEMATISCHE ANNALEN
MATHEMATISCHE NACHRICHTEN	0025-584X	SCIE	MATHEMATISCHE NACHRICHTEN
ABHANDLUNGEN AUS DEM MATHEMATISCHEN SEMINAR DER UNIVERSITAT HAMBURG	0025-5858	SCIE	ABHANDLUNGEN AUS DEM MATHEMATISCHEN SEMINAR DER UNIVERSITAT HAMBURG
MATHEMATISCHE ZEITSCHRIFT	0025-5874	SCIE	MATHEMATISCHE ZEITSCHRIFT
MAYDICA	0025-6153	SCIE	MAYDICA	OAJ	CRA Maize Research Unit
MAYO CLINIC PROCEEDINGS	0025-6196	SCIE	MAYO CLINIC PROCEEDINGS
MECCANICA	0025-6455	SCIE	MECCANICA
MECHANICAL ENGINEERING	0025-6501	SCIE	MECHANICAL ENGINEERING
MED CARE	0025-7079	SSCI
MEDICAL CLINICS OF NORTH AMERICA	0025-7125	SCIE	MEDICAL CLINICS OF NORTH AMERICA
MEDICAL JOURNAL OF AUSTRALIA	0025-729X	SCIE	MEDICAL JOURNAL OF AUSTRALIA
J GERONTOL B-PSYCHOL	1079-5014	SSCI
MEDICINA-BUENOS AIRES	0025-7680	SCIE	MEDICINA-BUENOS AIRES	OAJ	Fundación Revista Medicina
MEDICINA CLINICA	0025-7753	SCIE	MEDICINA CLINICA
RESPIRATION	0025-7931	SCIE	RESPIRATION
MEDICINE	0025-7974	SCIE	MEDICINE
MED SCI LAW	0025-8024	SSCI
METABOLISM-CLINICAL AND EXPERIMENTAL	0026-0495	SCIE	METABOLISM-CLINICAL AND EXPERIMENTAL
METAL SCIENCE AND HEAT TREATMENT	0026-0673	SCIE	METAL SCIENCE AND HEAT TREATMENT
JOURNAL OF THE METEOROLOGICAL SOCIETY OF JAPAN	0026-1165	SCIE	JOURNAL OF THE METEOROLOGICAL SOCIETY OF JAPAN	OAJ	Meteorological Society of Japan
METHODS OF INFORMATION IN MEDICINE	0026-1270	SCIE	METHODS OF INFORMATION IN MEDICINE
METROLOGIA	0026-1394	SCIE	METROLOGIA
MICHIGAN MATHEMATICAL JOURNAL	0026-2285	SCIE	MICHIGAN MATHEMATICAL JOURNAL
MICROBIOLOGY	0026-2617	SCIE	MICROBIOLOGY
MICROCHEMICAL JOURNAL	0026-265X	SCIE	MICROCHEMICAL JOURNAL
MICROELECTRONICS RELIABILITY	0026-2714	SCIE	MICROELECTRONICS RELIABILITY
MICROPALEONTOLOGY	0026-2803	SCIE	MICROPALEONTOLOGY
MICROVASCULAR RESEARCH	0026-2862	SCIE	MICROVASCULAR RESEARCH
MICROCHIMICA ACTA	0026-3672	SCIE	MICROCHIMICA ACTA
MILCHWISSENSCHAFT-MILK SCIENCE INTERNATIONAL	0026-3788	SCIE	MILCHWISSENSCHAFT-MILK SCIENCE INTERNATIONAL
MILITARY MEDICINE	0026-4075	SCIE	MILITARY MEDICINE
MINERALIUM DEPOSITA	0026-4598	SCIE	MINERALIUM DEPOSITA
MINERALOGICAL MAGAZINE	0026-461X	SCIE	MINERALOGICAL MAGAZINE
MINERVA	0026-4695	SSCI
MINERVA CARDIOANGIOLOGICA	0026-4725	SCIE	MINERVA CARDIOANGIOLOGICA
MINERVA CHIRURGICA	0026-4733	SCIE	MINERVA CHIRURGICA
MINERVA MEDICA	0026-4806	SCIE	MINERVA MEDICA
MINERVA PEDIATRICA	0026-4946	SCIE	MINERVA PEDIATRICA
MINN LAW REV	0026-5535	SSCI
ANNALS OF THE MISSOURI BOTANICAL GARDEN	0026-6493	SCIE	ANNALS OF THE MISSOURI BOTANICAL GARDEN
MOD LANG J	0026-7902	SSCI
MOLECULAR BIOLOGY	0026-8933	SCIE	MOLECULAR BIOLOGY
MOLECULAR PHARMACOLOGY	0026-895X	SCIE	MOLECULAR PHARMACOLOGY
MOLECULAR PHYSICS	0026-8976	SCIE	MOLECULAR PHYSICS
MONATSHEFTE FUR CHEMIE	0026-9247	SCIE	MONATSHEFTE FUR CHEMIE
MONATSHEFTE FUR MATHEMATIK	0026-9255	SCIE	MONATSHEFTE FUR MATHEMATIK
MONATSSCHRIFT KINDERHEILKUNDE	0026-9298	SCIE	MONATSSCHRIFT KINDERHEILKUNDE
MONTHLY WEATHER REVIEW	0027-0644	SCIE	MONTHLY WEATHER REVIEW
MOUNT SINAI JOURNAL OF MEDICINE	0027-2507	SCIE	MOUNT SINAI JOURNAL OF MEDICINE
MYCOLOGIA	0027-5514	SCIE	MYCOLOGIA
NAGOYA MATHEMATICAL JOURNAL	0027-7630	SCIE	NAGOYA MATHEMATICAL JOURNAL
NATION	0027-8378	SSCI
PROCEEDINGS OF THE NATIONAL ACADEMY OF SCIENCES OF THE UNITED STATES OF AMERICA	0027-8424	SCIE	PROCEEDINGS OF THE NATIONAL ACADEMY OF SCIENCES OF THE UNITED STATES OF AMERICA
JNCI-JOURNAL OF THE NATIONAL CANCER INSTITUTE	0027-8874	SCIE	JNCI-JOURNAL OF THE NATIONAL CANCER INSTITUTE
JOURNAL OF THE NATIONAL MEDICAL ASSOCIATION	0027-9684	SCIE	JOURNAL OF THE NATIONAL MEDICAL ASSOCIATION
NATURE	0028-0836	SCIE	NATURE
NATURWISSENSCHAFTEN	0028-1042	SCIE	NATURWISSENSCHAFTEN
NAUNYN-SCHMIEDEBERGS ARCHIVES OF PHARMACOLOGY	0028-1298	SCIE	NAUNYN-SCHMIEDEBERGS ARCHIVES OF PHARMACOLOGY
NEOPLASMA	0028-2685	SCIE	NEOPLASMA
JOURNAL OF NEPAL MEDICAL ASSOCIATION	0028-2715	SCIE	JOURNAL OF NEPAL MEDICAL ASSOCIATION	OAJ	Nepal Medical Association
JUDGM DECIS MAK	1930-2975	SSCI		OAJ	Society for Judgment and Decision Making
JUDICATURE	0022-5800	SSCI
NEUROCHIRURGIE	0028-3770	SCIE	NEUROCHIRURGIE
KEDI J EDUC POLICY	1739-4341	SSCI
KNOWL MAN RES PRACT	1477-8238	SSCI
NEUROLOGIA I NEUROCHIRURGIA POLSKA	0028-3843	SCIE	NEUROLOGIA I NEUROCHIRURGIA POLSKA
KOREA OBS	0023-3919	SSCI
NEUROLOGY INDIA	0028-3886	SCIE	NEUROLOGY INDIA	OAJ	Medknow Publications
NEUROPSYCHOLOGIA	0028-3932	SSCI
NEURORADIOLOGY	0028-3940	SCIE	NEURORADIOLOGY
NEW ENGLAND JOURNAL OF MEDICINE	0028-4793	SCIE	NEW ENGLAND JOURNAL OF MEDICINE
KOREAN J DEF ANAL	1016-3271	SSCI
NEW ZEALAND JOURNAL OF BOTANY	0028-825X	SCIE	NEW ZEALAND JOURNAL OF BOTANY
NEW ZEALAND JOURNAL OF GEOLOGY AND GEOPHYSICS	0028-8306	SCIE	NEW ZEALAND JOURNAL OF GEOLOGY AND GEOPHYSICS
NEW ZEALAND JOURNAL OF MARINE AND FRESHWATER RESEARCH	0028-8330	SCIE	NEW ZEALAND JOURNAL OF MARINE AND FRESHWATER RESEARCH
NORWEGIAN JOURNAL OF GEOLOGY	0029-196X	SCIE	NORWEGIAN JOURNAL OF GEOLOGY	OAJ	Norwegian Geological Society (Norsk Geologisk Forening, NGF)
NORTHWEST SCIENCE	0029-344X	SCIE	NORTHWEST SCIENCE
NOTRE DAME JOURNAL OF FORMAL LOGIC	0029-4527	SCIE	NOTRE DAME JOURNAL OF FORMAL LOGIC
NOUS	0029-4624	AHCI
NOVA HEDWIGIA	0029-5035	SCIE	NOVA HEDWIGIA
NUCLEAR TECHNOLOGY	0029-5450	SCIE	NUCLEAR TECHNOLOGY
NUCLEAR ENGINEERING AND DESIGN	0029-5493	SCIE	NUCLEAR ENGINEERING AND DESIGN
NUCLEAR ENGINEERING INTERNATIONAL	0029-5507	SCIE	NUCLEAR ENGINEERING INTERNATIONAL
NUCLEAR FUSION	0029-5515	SCIE	NUCLEAR FUSION
NUKLEARMEDIZIN-NUCLEAR MEDICINE	0029-5566	SCIE	NUKLEARMEDIZIN-NUCLEAR MEDICINE
NUCLEAR SCIENCE AND ENGINEERING	0029-5639	SCIE	NUCLEAR SCIENCE AND ENGINEERING
NUKLEONIKA	0029-5922	SCIE	NUKLEONIKA
INTERNATIONAL JOURNAL FOR NUMERICAL METHODS IN ENGINEERING	0029-5981	SCIE	INTERNATIONAL JOURNAL FOR NUMERICAL METHODS IN ENGINEERING
NUMERISCHE MATHEMATIK	0029-599X	SCIE	NUMERISCHE MATHEMATIK
NURS CLIN N AM	0029-6465	SSCI
NURS OUTLOOK	0029-6554	SSCI
NURS RES	0029-6562	SSCI
NUTRITION REVIEWS	0029-6643	SCIE	NUTRITION REVIEWS
PROCEEDINGS OF THE NUTRITION SOCIETY	0029-6651	SCIE	PROCEEDINGS OF THE NUTRITION SOCIETY
OBSTETRICAL & GYNECOLOGICAL SURVEY	0029-7828	SCIE	OBSTETRICAL & GYNECOLOGICAL SURVEY
OBSTETRICS AND GYNECOLOGY	0029-7844	SCIE	OBSTETRICS AND GYNECOLOGY
OCEAN ENGINEERING	0029-8018	SCIE	OCEAN ENGINEERING
OECOLOGIA	0029-8549	SCIE	OECOLOGIA
OIKOS	0030-1299	SCIE	OIKOS
OIL & GAS JOURNAL	0030-1388	SCIE	OIL & GAS JOURNAL
KOREAN JOURNAL OF PHYSIOLOGY & PHARMACOLOGY	1226-4512	SCIE	KOREAN JOURNAL OF PHYSIOLOGY & PHARMACOLOGY
ONDERSTEPOORT JOURNAL OF VETERINARY RESEARCH	0030-2465	SCIE	ONDERSTEPOORT JOURNAL OF VETERINARY RESEARCH	OAJ	AOSIS OpenJournals
OPHTHALMIC RESEARCH	0030-3747	SCIE	OPHTHALMIC RESEARCH
OPHTHALMOLOGICA	0030-3755	SCIE	OPHTHALMOLOGICA
OPTICS AND LASER TECHNOLOGY	0030-3992	SCIE	OPTICS AND LASER TECHNOLOGY
OPTICS COMMUNICATIONS	0030-4018	SCIE	OPTICS COMMUNICATIONS
OPTIK	0030-4026	SCIE	OPTIK
ORGANIC PREPARATIONS AND PROCEDURES INTERNATIONAL	0030-4948	SCIE	ORGANIC PREPARATIONS AND PROCEDURES INTERNATIONAL
ORIENTAL INSECTS	0030-5316	SCIE	ORIENTAL INSECTS
ORNIS FENNICA	0030-5685	SCIE	ORNIS FENNICA
ORTHOPEDIC CLINICS OF NORTH AMERICA	0030-5898	SCIE	ORTHOPEDIC CLINICS OF NORTH AMERICA
ORYX	0030-6053	SCIE	ORYX
OSAKA JOURNAL OF MATHEMATICS	0030-6126	SCIE	OSAKA JOURNAL OF MATHEMATICS	OAJ	Osaka University
OSTRICH	0030-6525	SCIE	OSTRICH
OTOLARYNGOLOGIC CLINICS OF NORTH AMERICA	0030-6665	SCIE	OTOLARYNGOLOGIC CLINICS OF NORTH AMERICA
OXIDATION OF METALS	0030-770X	SCIE	OXIDATION OF METALS
PACIFIC JOURNAL OF MATHEMATICS	0030-8730	SCIE	PACIFIC JOURNAL OF MATHEMATICS
PACIFIC SCIENCE	0030-8870	SCIE	PACIFIC SCIENCE
PAKISTAN JOURNAL OF ZOOLOGY	0030-9923	SCIE	PAKISTAN JOURNAL OF ZOOLOGY
JOURNAL OF THE PAKISTAN MEDICAL ASSOCIATION	0030-9982	SCIE	JOURNAL OF THE PAKISTAN MEDICAL ASSOCIATION
PALAEOGEOGRAPHY PALAEOCLIMATOLOGY PALAEOECOLOGY	0031-0182	SCIE	PALAEOGEOGRAPHY PALAEOCLIMATOLOGY PALAEOECOLOGY
PALAEONTOLOGISCHE ZEITSCHRIFT	0031-0220	SCIE	PALAEONTOLOGISCHE ZEITSCHRIFT
PALAEONTOLOGY	0031-0239	SCIE	PALAEONTOLOGY
PAN-PACIFIC ENTOMOLOGIST	0031-0603	SCIE	PAN-PACIFIC ENTOMOLOGIST
PARASITOLOGY	0031-1820	SCIE	PARASITOLOGY
PATHOLOGY	0031-3025	SCIE	PATHOLOGY
PATTERN RECOGNITION	0031-3203	SCIE	PATTERN RECOGNITION
PEDIATRIC CLINICS OF NORTH AMERICA	0031-3955	SCIE	PEDIATRIC CLINICS OF NORTH AMERICA
PEDIATRIC RESEARCH	0031-3998	SCIE	PEDIATRIC RESEARCH
PEDIATRICS	0031-4005	SCIE	PEDIATRICS
PEDOBIOLOGIA	0031-4056	SCIE	PEDOBIOLOGIA
PERCEPT MOTOR SKILL	0031-5125	SSCI
PERIODICA MATHEMATICA HUNGARICA	0031-5303	SCIE	PERIODICA MATHEMATICA HUNGARICA
PERSOONIA	0031-5850	SCIE	PERSOONIA	OAJ	Naturalis Biodiversity Center & Centraalbureau voor Schimmelcultures
PERSPECTIVES IN BIOLOGY AND MEDICINE	0031-5982	SCIE	PERSPECTIVES IN BIOLOGY AND MEDICINE
PERSPECT PSYCHIATR C	0031-5990	SSCI
PFLUGERS ARCHIV-EUROPEAN JOURNAL OF PHYSIOLOGY	0031-6768	SCIE	PFLUGERS ARCHIV-EUROPEAN JOURNAL OF PHYSIOLOGY
EUROPEAN JOURNAL OF CLINICAL PHARMACOLOGY	0031-6970	SCIE	EUROPEAN JOURNAL OF CLINICAL PHARMACOLOGY
PHARMACOLOGICAL REVIEWS	0031-6997	SCIE	PHARMACOLOGICAL REVIEWS
PHARMACOLOGY	0031-7012	SCIE	PHARMACOLOGY
PHARMAZEUTISCHE INDUSTRIE	0031-711X	SCIE	PHARMAZEUTISCHE INDUSTRIE
KYKLOS	0023-5962	SSCI
PHI DELTA KAPPAN	0031-7217	SSCI
PHILIPPINE JOURNAL OF VETERINARY MEDICINE	0031-7705	SCIE	PHILIPPINE JOURNAL OF VETERINARY MEDICINE
PHILOSOPHICAL FORUM	0031-806X	AHCI
PHILOSOPHICAL REVIEW	0031-8108	AHCI
PHILOSOPHY	0031-8191	AHCI
PHOTOCHEMISTRY AND PHOTOBIOLOGY	0031-8655	SCIE	PHOTOCHEMISTRY AND PHOTOBIOLOGY
PHOTOGRAMMETRIC RECORD	0031-868X	SCIE	PHOTOGRAMMETRIC RECORD
PHRONESIS-A JOURNAL FOR ANCIENT PHILOSOPHY	0031-8868	AHCI
PHYCOLOGIA	0031-8884	SCIE	PHYCOLOGIA
PHYSICA SCRIPTA	0031-8949	SCIE	PHYSICA SCRIPTA
PHYSICAL REVIEW LETTERS	0031-9007	SCIE	PHYSICAL REVIEW LETTERS
JOURNAL OF THE PHYSICAL SOCIETY OF JAPAN	0031-9015	SCIE	JOURNAL OF THE PHYSICAL SOCIETY OF JAPAN
PHYSICAL THERAPY	0031-9023	SCIE	PHYSICAL THERAPY
LABOUR ECON	0927-5371	SSCI
LAND ECON	0023-7639	SSCI
PHYSICS AND CHEMISTRY OF LIQUIDS	0031-9104	SCIE	PHYSICS AND CHEMISTRY OF LIQUIDS
PHYSICS IN MEDICINE AND BIOLOGY	0031-9155	SCIE	PHYSICS IN MEDICINE AND BIOLOGY
PHYSICS OF METALS AND METALLOGRAPHY	0031-918X	SCIE	PHYSICS OF METALS AND METALLOGRAPHY
PHYSICS OF THE EARTH AND PLANETARY INTERIORS	0031-9201	SCIE	PHYSICS OF THE EARTH AND PLANETARY INTERIORS
PHYSICS TODAY	0031-9228	SCIE	PHYSICS TODAY
PHYSIOLOGIA PLANTARUM	0031-9317	SCIE	PHYSIOLOGIA PLANTARUM
PHYSIOLOGICAL REVIEWS	0031-9333	SCIE	PHYSIOLOGICAL REVIEWS
PHYSIOL BEHAV	0031-9384	SSCI
PHYSIOTHERAPY	0031-9406	SCIE	PHYSIOTHERAPY
PHYTOCHEMISTRY	0031-9422	SCIE	PHYTOCHEMISTRY
PHYTOPATHOLOGIA MEDITERRANEA	0031-9465	SCIE	PHYTOPATHOLOGIA MEDITERRANEA
PHYTOPATHOLOGY	0031-949X	SCIE	PHYTOPATHOLOGY
PLANETARY AND SPACE SCIENCE	0032-0633	SCIE	PLANETARY AND SPACE SCIENCE
PLANT AND CELL PHYSIOLOGY	0032-0781	SCIE	PLANT AND CELL PHYSIOLOGY
PLANT AND SOIL	0032-079X	SCIE	PLANT AND SOIL
PLANT PATHOLOGY	0032-0862	SCIE	PLANT PATHOLOGY
PLANT PHYSIOLOGY	0032-0889	SCIE	PLANT PHYSIOLOGY
PLANTA	0032-0935	SCIE	PLANTA
PLANTA MEDICA	0032-0943	SCIE	PLANTA MEDICA
PLASTIC AND RECONSTRUCTIVE SURGERY	0032-1052	SCIE	PLASTIC AND RECONSTRUCTIVE SURGERY
PLATINUM METALS REVIEW	0032-1400	SCIE	PLATINUM METALS REVIEW	OAJ	Johnson Matthey
LAND USE POLICY	0264-8377	SSCI
LANDSCAPE AND ECOLOGICAL ENGINEERING	1860-1871	SCIE	LANDSCAPE AND ECOLOGICAL ENGINEERING
LANGUAGE	0097-8507	SSCI
POLSKIE ARCHIWUM MEDYCYNY WEWNETRZNEJ-POLISH ARCHIVES OF INTERNAL MEDICINE	0032-3772	SCIE	POLSKIE ARCHIWUM MEDYCYNY WEWNETRZNEJ-POLISH ARCHIVES OF INTERNAL MEDICINE	OAJ	Medycyna Praktyczna
POLYMER	0032-3861	SCIE	POLYMER
POLYMER ENGINEERING AND SCIENCE	0032-3888	SCIE	POLYMER ENGINEERING AND SCIENCE
POLYMER JOURNAL	0032-3896	SCIE	POLYMER JOURNAL
LANG SPEECH	0023-8309	SSCI
LANG ASSESS Q	1543-4303	SSCI
LATE IMPERIAL CHINA	0884-3236	AHCI
POSTEPY HIGIENY I MEDYCYNY DOSWIADCZALNEJ	0032-5449	SCIE	POSTEPY HIGIENY I MEDYCYNY DOSWIADCZALNEJ	OAJ	Index Copernicus International S.A.
POSTGRADUATE MEDICAL JOURNAL	0032-5473	SCIE	POSTGRADUATE MEDICAL JOURNAL
POSTGRADUATE MEDICINE	0032-5481	SCIE	POSTGRADUATE MEDICINE
POULTRY SCIENCE	0032-5791	SCIE	POULTRY SCIENCE
POWDER METALLURGY	0032-5899	SCIE	POWDER METALLURGY
POWDER TECHNOLOGY	0032-5910	SCIE	POWDER TECHNOLOGY
POWER	0032-5929	SCIE	POWER
LAW HUMAN BEHAV	0147-7307	SSCI
PRIMATES	0032-8332	SCIE	PRIMATES
PROBLEMS OF INFORMATION TRANSMISSION	0032-9460	SCIE	PROBLEMS OF INFORMATION TRANSMISSION
PROGRESS IN CARDIOVASCULAR DISEASES	0033-0620	SCIE	PROGRESS IN CARDIOVASCULAR DISEASES
PROGRESS OF THEORETICAL PHYSICS	0033-068X	SCIE	PROGRESS OF THEORETICAL PHYSICS
PROTOPLASMA	0033-183X	SCIE	PROTOPLASMA
PSYCHIATRIA POLSKA	0033-2674	SCIE	PSYCHIATRIA POLSKA	OAJ	Polskie Towarzystwo Psychiatryczne
PSYCHIAT QUART	0033-2720	SSCI
PSYCHIATRY	0033-2747	SSCI
PSYCHOANAL QUART	0033-2828	SSCI
PSYCHOL BELG	0033-2879	SSCI
LEADERSHIP QUART	1048-9843	SSCI
LEARNING & MEMORY	1072-0502	SCIE	LEARNING & MEMORY
PSYCHOL MED	0033-2917	SSCI
PSYCHOPHARMACOLOGY	0033-3158	SCIE	PSYCHOPHARMACOLOGY
PSYCHOSOM MED	0033-3174	SSCI
PSYCHOSOMATICS	0033-3182	SSCI
PSYCHOTHER PSYCHOSOM	0033-3190	SSCI
PUBLIC HEALTH	0033-3506	SSCI
PUBLIC HEALTH REP	0033-3549	SSCI
LEGIS STUD QUART	0362-9805	SSCI
LEISURE SCI	0149-0400	SSCI
PUBLICATIONES MATHEMATICAE-DEBRECEN	0033-3883	SCIE	PUBLICATIONES MATHEMATICAE-DEBRECEN
PURE AND APPLIED CHEMISTRY	0033-4545	SCIE	PURE AND APPLIED CHEMISTRY
PURE AND APPLIED GEOPHYSICS	0033-4553	SCIE	PURE AND APPLIED GEOPHYSICS
LIBR QUART	0024-2519	SSCI
LIBR TRENDS	0024-2594	SSCI
LIFE SCIENCES	0024-3205	SCIE	LIFE SCIENCES
QUARTERLY JOURNAL OF MATHEMATICS	0033-5606	SCIE	QUARTERLY JOURNAL OF MATHEMATICS
QUARTERLY JOURNAL OF MECHANICS AND APPLIED MATHEMATICS	0033-5614	SCIE	QUARTERLY JOURNAL OF MECHANICS AND APPLIED MATHEMATICS
QUARTERLY OF APPLIED MATHEMATICS	0033-569X	SCIE	QUARTERLY OF APPLIED MATHEMATICS
QUARTERLY REVIEW OF BIOLOGY	0033-5770	SCIE	QUARTERLY REVIEW OF BIOLOGY
QUARTERLY REVIEWS OF BIOPHYSICS	0033-5835	SCIE	QUARTERLY REVIEWS OF BIOPHYSICS
QUATERNARY RESEARCH	0033-5894	SCIE	QUATERNARY RESEARCH
QUINTESSENCE INTERNATIONAL	0033-6572	SCIE	QUINTESSENCE INTERNATIONAL
RADIATION RESEARCH	0033-7587	SCIE	RADIATION RESEARCH
RADIOCARBON	0033-8222	SCIE	RADIOCARBON
RADIOCHIMICA ACTA	0033-8230	SCIE	RADIOCHIMICA ACTA
RADIOLOGE	0033-832X	SCIE	RADIOLOGE
RADIOLOGIC CLINICS OF NORTH AMERICA	0033-8389	SCIE	RADIOLOGIC CLINICS OF NORTH AMERICA
RADIOLOGY	0033-8419	SCIE	RADIOLOGY
RADIOPHYSICS AND QUANTUM ELECTRONICS	0033-8443	SCIE	RADIOPHYSICS AND QUANTUM ELECTRONICS
RADIOPROTECTION	0033-8451	SCIE	RADIOPROTECTION
READ TEACH	0034-0561	SSCI
LINGUIST INQ	0024-3892	SSCI
LINGUIST REV	0167-6318	SSCI
REMOTE SENSING OF ENVIRONMENT	0034-4257	SCIE	REMOTE SENSING OF ENVIRONMENT
REPORTS ON MATHEMATICAL PHYSICS	0034-4877	SCIE	REPORTS ON MATHEMATICAL PHYSICS
REPORTS ON PROGRESS IN PHYSICS	0034-4885	SCIE	REPORTS ON PROGRESS IN PHYSICS
RES TEACH ENGL	0034-527X	SSCI
RESEARCH IN VETERINARY SCIENCE	0034-5288	SCIE	RESEARCH IN VETERINARY SCIENCE
PUBLICATIONS OF THE RESEARCH INSTITUTE FOR MATHEMATICAL SCIENCES	0034-5318	SCIE	PUBLICATIONS OF THE RESEARCH INSTITUTE FOR MATHEMATICAL SCIENCES
REV ECON STAT	0034-6535	SSCI
REV EDUC RES	0034-6543	SSCI
REVIEW OF METAPHYSICS	0034-6632	AHCI
REVIEW OF PALAEOBOTANY AND PALYNOLOGY	0034-6667	SCIE	REVIEW OF PALAEOBOTANY AND PALYNOLOGY
REVIEW OF SCIENTIFIC INSTRUMENTS	0034-6748	SCIE	REVIEW OF SCIENTIFIC INSTRUMENTS
REVIEWS OF MODERN PHYSICS	0034-6861	SCIE	REVIEWS OF MODERN PHYSICS
REVISTA BRASILEIRA DE ANESTESIOLOGIA	0034-7094	SCIE	REVISTA BRASILEIRA DE ANESTESIOLOGIA	OAJ	Sociedade Brasileira de Anestesiologia
REVISTA DE BIOLOGIA TROPICAL	0034-7744	SCIE	REVISTA DE BIOLOGIA TROPICAL	OAJ	Universidad de Costa Rica
REVISTA DE INVESTIGACION CLINICA	0034-8376	SCIE	REVISTA DE INVESTIGACION CLINICA
REVISTA MEDICA DE CHILE	0034-9887	SCIE	REVISTA MEDICA DE CHILE	OAJ	Sociedad Médica de Santiago
REVISTA MEXICANA DE FISICA	0035-001X	SCIE	REVISTA MEXICANA DE FISICA	OAJ	Sociedad Mexicana de Física
REVUE DE METALLURGIE-CAHIERS D INFORMATIONS TECHNIQUES	0035-1563	SCIE	REVUE DE METALLURGIE-CAHIERS D INFORMATIONS TECHNIQUES
REVUE NEUROLOGIQUE	0035-3787	SCIE	REVUE NEUROLOGIQUE
RHEOLOGICA ACTA	0035-4511	SCIE	RHEOLOGICA ACTA
RHODORA	0035-4902	SCIE	RHODORA
RIVISTA ITALIANA DI PALEONTOLOGIA E STRATIGRAFIA	0035-6883	SCIE	RIVISTA ITALIANA DI PALEONTOLOGIA E STRATIGRAFIA
ROCKY MOUNTAIN JOURNAL OF MATHEMATICS	0035-7596	SCIE	ROCKY MOUNTAIN JOURNAL OF MATHEMATICS
JOURNAL OF THE ROYAL ARMY MEDICAL CORPS	0035-8665	SCIE	JOURNAL OF THE ROYAL ARMY MEDICAL CORPS
MONTHLY NOTICES OF THE ROYAL ASTRONOMICAL SOCIETY	0035-8711	SCIE	MONTHLY NOTICES OF THE ROYAL ASTRONOMICAL SOCIETY
ANNALS OF THE ROYAL COLLEGE OF SURGEONS OF ENGLAND	0035-8843	SCIE	ANNALS OF THE ROYAL COLLEGE OF SURGEONS OF ENGLAND
QUARTERLY JOURNAL OF THE ROYAL METEOROLOGICAL SOCIETY	0035-9009	SCIE	QUARTERLY JOURNAL OF THE ROYAL METEOROLOGICAL SOCIETY
LONG RANGE PLANN	0024-6301	SSCI
JOURNAL OF THE ROYAL STATISTICAL SOCIETY SERIES C-APPLIED STATISTICS	0035-9254	SCIE	JOURNAL OF THE ROYAL STATISTICAL SOCIETY SERIES C-APPLIED STATISTICS
RUBBER CHEMISTRY AND TECHNOLOGY	0035-9475	SCIE	RUBBER CHEMISTRY AND TECHNOLOGY
RUSSIAN CHEMICAL REVIEWS	0036-021X	SCIE	RUSSIAN CHEMICAL REVIEWS
RUSSIAN JOURNAL OF PHYSICAL CHEMISTRY A	0036-0244	SCIE	RUSSIAN JOURNAL OF PHYSICAL CHEMISTRY A
SIAM JOURNAL ON APPLIED MATHEMATICS	0036-1399	SCIE	SIAM JOURNAL ON APPLIED MATHEMATICS
SIAM JOURNAL ON MATHEMATICAL ANALYSIS	0036-1410	SCIE	SIAM JOURNAL ON MATHEMATICAL ANALYSIS
SIAM JOURNAL ON NUMERICAL ANALYSIS	0036-1429	SCIE	SIAM JOURNAL ON NUMERICAL ANALYSIS
SIAM REVIEW	0036-1445	SCIE	SIAM REVIEW
SALUD PUBLICA MEXICO	0036-3634	SSCI		OAJ	Instituto Nacional de Salud Pública
M&SOM-MANUF SERV OP	1523-4614	SSCI
MACROECON DYN	1365-1005	SSCI
SCANDINAVIAN JOURNAL OF CLINICAL & LABORATORY INVESTIGATION	0036-5513	SCIE	SCANDINAVIAN JOURNAL OF CLINICAL & LABORATORY INVESTIGATION
SCANDINAVIAN JOURNAL OF GASTROENTEROLOGY	0036-5521	SCIE	SCANDINAVIAN JOURNAL OF GASTROENTEROLOGY
SCANDINAVIAN JOURNAL OF INFECTIOUS DISEASES	0036-5548	SCIE	SCANDINAVIAN JOURNAL OF INFECTIOUS DISEASES
MAGNESIUM RESEARCH	0953-1424	SCIE	MAGNESIUM RESEARCH
SCHWEIZER ARCHIV FUR TIERHEILKUNDE	0036-7281	SCIE	SCHWEIZER ARCHIV FUR TIERHEILKUNDE
SCIENCE	0036-8075	SCIE	SCIENCE
SCI EDUC	0036-8326	SSCI
SCIENTIFIC AMERICAN	0036-8733	SCIE	SCIENTIFIC AMERICAN
SCOTTISH MEDICAL JOURNAL	0036-9330	SCIE	SCOTTISH MEDICAL JOURNAL
SEDIMENTARY GEOLOGY	0037-0738	SCIE	SEDIMENTARY GEOLOGY
SEDIMENTOLOGY	0037-0746	SCIE	SEDIMENTOLOGY
BULLETIN OF THE SEISMOLOGICAL SOCIETY OF AMERICA	0037-1106	SCIE	BULLETIN OF THE SEISMOLOGICAL SOCIETY OF AMERICA
SEMINARS IN HEMATOLOGY	0037-1963	SCIE	SEMINARS IN HEMATOLOGY
SEMINARS IN ROENTGENOLOGY	0037-198X	SCIE	SEMINARS IN ROENTGENOLOGY
SIBERIAN MATHEMATICAL JOURNAL	0037-4466	SCIE	SIBERIAN MATHEMATICAL JOURNAL
SILVA FENNICA	0037-5330	SCIE	SILVA FENNICA	OAJ	Finnish Society of Forest Science, Finnish Forest Research Institute
SILVAE GENETICA	0037-5349	SCIE	SILVAE GENETICA
SIMULATION-TRANSACTIONS OF THE SOCIETY FOR MODELING AND SIMULATION INTERNATIONAL	0037-5497	SCIE	SIMULATION-TRANSACTIONS OF THE SOCIETY FOR MODELING AND SIMULATION INTERNATIONAL
SINGAPORE MEDICAL JOURNAL	0037-5675	SCIE	SINGAPORE MEDICAL JOURNAL
SOC WORK	0037-8046	SSCI
ANNALES DE LA SOCIETE ENTOMOLOGIQUE DE FRANCE	0037-9271	SCIE	ANNALES DE LA SOCIETE ENTOMOLOGIQUE DE FRANCE
BULLETIN DE LA SOCIETE GEOLOGIQUE DE FRANCE	0037-9409	SCIE	BULLETIN DE LA SOCIETE GEOLOGIQUE DE FRANCE
BULLETIN DE LA SOCIETE MATHEMATIQUE DE FRANCE	0037-9484	SCIE	BULLETIN DE LA SOCIETE MATHEMATIQUE DE FRANCE
SEN-I GAKKAISHI	0037-9875	SCIE	SEN-I GAKKAISHI
SOCIOL RURALIS	0038-0199	SSCI
MANAGE DECIS	0025-1747	SSCI
[truncated: 10,423 more rows]

## Sheet: Sheet2
행 레이블	개수 : 참고자료
OAJ	386
(비어 있음)	6043
총합계	6429
