# Supplementary material for: Usage Trends of Open Access and Local Journals: A Korean Case Study
Source: PLoS One. 2016 May 19;11(5):e0155843. doi: 10.1371/journal.pone.0155843 (PMC4873189; doi:10.1371/journal.pone.0155843)
Supplement: S4 Table — (XLSX) [file pone.0155843.s005.xlsx]

## Sheet: UlrichsUniverseJnls
ISSN	Title	Publisher
1622-8324	02	Association Zoo Galerie
1874-6632	2	Thierry Somers, Ed. & Pub.
1874-6640	2	Thierry Somers, Ed. & Pub.
2111-4609	2	Association Zoo Galerie
	2	2
1959-2914	4	Association Zoo Galerie
0957-3860	7	James Bond International Fan Club
	10	Zac Publishing, Ltd.
	10	Zac Publishing, Ltd.
1075-3109	16	Laufer Media, Inc.
	16	Attic Futura Verlag GmbH
1220-5761	22	Revista 22
1583-6029	22	Revista 22
	45	45
2000-9534	290	Svenskt Naeringsliv
1747-7859	360	Imagine Publishing Ltd.
2212-7615	360	360 International Media
2212-7623	360	360 International Media
2106-3168	360	La Communaute de Communes du Pays de Saint-Galmier
1892-0381	365	Amnesty International Norge
	625	Izdatel'stvo 625
1933-1096	704	Red Palm Publishing, LLC
	904	White Publishing Company
2262-3191	1605	Schilick Langues
	1766	Rutgers Alumni Association
2214-1138	1900	Blue Flower Media
	2001	2001
2211-288X	2028	Arko Sports Media
1954-1295	2512	L' Ours et la Prose
1649-6817	24/7	24/7
	10 - 4	Royal Fiji Police
2223-5418	"Belye Pyatna" Rossiiskoi i Mirovoi Istorii	Analitika Rodis
1042-7341	"Check the Oil!" Magazine	International Petroliana Collectors' Association
1522-306X	"Extra" Work for Brain Surgeons: the authority in extras casting information	Hollywood Operating System LLC
2257-4131	"Lire et Relire"	Editions de la Difference
2262-0958	"Mauvais Temps"	L' Oeil du Souffleur
2260-0884	"Medias & S H S"	I F P
1841-9267	"Petru Maior" University of Tirgu Mures. Scientific Bulletin	Editura Universitatii "Petru Maior" din Tirgu Mures
2285-438X	"Petru Maior" University of Tirgu Mures. Scientific Bulletin	Editura Universitatii "Petru Maior" din Tirgu Mures
2119-0666	"Presence Europeenne"	Les Editions Romaines
2214-6377	Hashtag	Jan van Eyck Academie
2045-2373	Number 3	Journal Number 3
2211-9426	Number 59 Magazine	Suite 59 Gallery
1557-2676	$100,000 Quilting Challenge	Reality Publishing, LLC
	Andpersand	MaXposure Media Group, LLC.
	Andpersand	Maxposure Media Group (India) Pvt. Ltd.
1604-1267	Og Maelk: sundhed, shopping, forbrug, mejeribrug, kogeboeger, ernaering, landbrug, mad	Mejeriforeningen
1903-2331	Og Maelk: sundhed, shopping, forbrug, mejeribrug, kogeboeger, ernaering, landbrug, mad	Mejeriforeningen
2161-0282	(201): best of bergen	North Jersey Media Group
2013-0864	(con)textos: revista d'antropologia i investigacio social	Universitat de Barcelona, Departament d'Antropologia Cultural
2261-7264	(De)construire le Canon	(De)construire le Canon
2212-9294	(Her)bouwkosten Agrarische Gebouwen	Sdu Uitgevers bv
2212-9278	(Her)bouwkosten Bedrijfspanden	Sdu Uitgevers bv
2212-9286	(Her)bouwkosten Woningen	Sdu Uitgevers bv
1949-0747	(Re)thinking Environmental Education	Peter Lang Publishing, Inc.
1559-5145	(Re)-turn: a journal of Lacanian studies	University of Missouri Press
	(Year) A R R L Periodicals CD-ROM	American Radio Relay League, Inc.
	(Year) Allen D. Leman Swine Conference. Proceedings	University of Minnesota, College of Veterinary Medicine
	(Year) Annual Index: Photofact, Computerfact, V C R Fact, Radio, T V & Selected Original Manufacturer's Service Data	Howard W. Sams & Co.
	(Year) Belize Labour Force Indicators	Ministry of Finance, Central Statistical Office
	(Year) Book of Modules	University College Cork
	(Year) Census of Agriculture	U.S. Department of Agriculture, National Agricultural Statistics Service
	(Year) Census of Population and Housing	U.S. Census Bureau. Population Division
	(Year) Corporate Loan Market Directory	Institutional Investor News
	(Year) Correctional Foodservice Who's Who	Information Central Inc.
	(Year) D P R K Country Report	K D I School of Public Policy and Management
	(Year) Directory of Taiwan's Leading Manufacturers and Exporters	China Economic News Service
	(Year) Directory of Think Tanks in Japan	National Institute for Research Advancement
	(Year) Environmental Report: focused on the green	Fujitsu Ltd.
1090-4875	(Year) Federal Tax Course	Aspen Law & Business
	(Year) Global Comparison of Test Methods	Association of the Nonwoven Fabrics Industry (I N D A)
1077-1212	(Year) Index of Social Health	Institute for Innovation in Social Policy
	(Year) Influenza Immunizations Paid For by Medicare: state and county rates	U.S. Department of Health and Human Services, Centers for Medicare & Medicaid Services
1091-8043	(Year) International Conference on Solid Waste Technology. Proceedings	Widener University, Department of Civil Engineering
	(Year) Jeon-gi Yeon-gam	Daehan Jeon-gi Hyeob-hoe
	(Year) Journalism Awards and Fellowships Directory	Editor & Publisher Co., Inc.
	(Year) Logis de France Guide Book	Federation Nationale des Logis de France
	(Year) Media Manufacturing Marketplace	Knowledge Industry Publications, Inc.
	(Year) Medical Services Directory	Minnesota Physician Publishing, Inc.
1051-1555	(Year) Multistate Corporate Tax Guide	C C H Inc.
1092-602X	(Year) National Electrical Estimator	Craftsman Book Company
	(Year) National Profile Directory of Independent Agents and Brokers	International Press Publications Inc
	(Year) North Carolina Metal Processors Directory	North Carolina State University, Industrial Extension Service
	(Year) Oakland Athletic Magazine	Woodford Publishing, Inc.
1536-0024	(Year) Oncology Nursing Drug Handbook	Jones & Bartlett Learning
	(Year) Peace Calendar	War Resisters League
	(Year) Picture Price Guide	Art Sales Index Ltd
1027-2798	(Year) Priorities and Progress under the Great Lakes Water Quality Agreement	International Joint Commission, Great Lakes Regional Office
	(Year) Restaurant Industry Operations Report	National Restaurant Association
	(Year) Roanoke Metropolitan Area Industrial Directory	Roanoke Regional Chamber of Commerce
	(Year) San Diego Chargers Official Yearbook	Woodford Publishing, Inc.
1099-7970	(Year) Soya & Oilseed Bluebook	Soyatech, Inc.
	(Year) State Health Profiles	U.S. Department of Health and Human Services, Centers for Disease Control and Prevention
1541-8618	(Year) Supplier Diversity Information Resource Guide	Diversity Information Resources, Inc.
	(Year) T A P P I Recycling Symposium	T A P P I
0083-1700	(Year) U.S. Master Tax Guide	C C H Inc.
	(Year) U.S. Multistate Corporate Tax Guide	C C H Inc.
1043-0261	(Year) V I P Address Book	Associated Media Companies, Ltd.
	(Year) Women's Volleyball Media Guide	Big Ten Conference
0084-3849	(Year) Yearbook of Jehovah's Witnesses	Watch Tower Bible and Tract Society of Pennsylvania, Inc.
	(Years) C N Daily Planner	Carroll Services, Inc.
1875-6069	*Sprank	Verenigingsbureau Divosa
1689-6785	... i Ja!	Colorful Media
2049-5056	.22 Shooter	Ebcon Publishing Ltd.
1355-7602	.Net	Future Publishing Ltd.
1365-4977	.Net	Future Publishing Ltd.
1541-2849	.Net Developer's Journal: world's leading .net resource	SYS-CON Media, Inc.
	//Self Serve	VOYAGI, Inc.
2329-9339	:Enquiry (Washington D.C.): the A R C C Journal of Architectural Research	Architectural Research Centers Consortium
1647-6158	:Estudio	Universidade de Lisboa, Faculdade de Belas Artes
1647-7316	:Estudio	Universidade de Lisboa, Faculdade de Belas Artes
1431-0716	:in Deutsch	Bergmoser und Hoeller Verlag GmbH
1618-0801	:in Englisch	Bergmoser und Hoeller Verlag GmbH
1434-2251	:in Religion	Bergmoser und Hoeller Verlag GmbH
1044-6397	;login:	The Usenix Association
2169-9364	;login:	The Usenix Association
	@ Philia	Philia Dialogue on Caring Citizenship
1932-698X	@ This Point: theological investigations in church and culture	Columbia Theological Seminary
1945-8479	@anime!	Animetro Studios
2261-8279	@Do C E Af	Ateliers des Doctorants du Centre d'Etudes Africaines
1368-9371	@Eco.News	P S Informatics
2240-2446	@L U M S A	Libera Universita Maria Santissima Assunta (L U M S A)
1089-7216	@Law	National Association of Legal Secretaries
2070-2795	@leisure	2 Inspire U Media
2311-7591	@Liberty: the policy bulletin of the I R R	South African Institute of Race Relations
	@live: shuiwei shishang	Zixun Chuanzhen Jituan
1715-9261	@nalyses: revue de critique et de theorie litteraire	University of Ottawa
1989-3477	@tic: revista d'innovacio educativa	Universitat de Valencia
	[030] Stadtmagazin	Lloyd-Presse Verlags-GmbH
1378-5060	[corporate] solutions	Nielsen Business Publications
1378-5079	[corporate] solutions	Nielsen Business Publications
1715-6505	[Go] Export	Laurentides International
1947-590X	[nxtlvl] Magazine: Christ. life. music.	Ogadi Fields, Ed. & Pub.
1832-1577	[R]evolution: the progressive Australian MTB magazine	[R]evolution MTB
1836-9065	[untitled]	Busybird Publishing and Design
2191-7957	]Trash[pool: Zeitschrift fuer Literatur und Kunst	Trashpool
2160-7818	`round	Jones Studio Ltd.
	`round	Jones Studio Ltd.
1796-8984	+Auto	Verotieto Oy
1851-1287	+info	Domus Editora
2013-5947	+Kdades	Generalitat de Catalunya, Agencia Catalana de Proteccio de Dades
	<>: the art. the fashion. the fantasy	Eromedia GmbH
1022-9698	0 yu 1 Byte Keji Zazhi	Acer T W P Corporation
1878-8971	00/24 Magazine Horloges	Alfabet Publishers BV
	002 Houston Magazine	002 Magazine
	002 Latino	Nodo Magazine LLC
	01 - Informatique Hebdo	S.P.P.S.
1252-4786	01 Reseaux	Groupe Tests
2266-7989	01net	NextInteractiveMedia
2268-1280	01net. Hors-serie	NextInteractiveMedia
2119-4912	02 a Marseille	Association Zoo Galerie
2076-8486	021 Magazine	021 Magazine
2296-0597	027.7 : Zeitschrift fuer Bibliothekskultur	Universitaetsbibliothek Basel
1611-3535	032c: fashion, art & conflict	032c Workshop
	089.net	Pflasterstrandt Gesellschaft fuer Kommunikationsdienstleistungen mbH
1946-5580	1 MagDenver	One Media Group
1946-5599	1 MagDenver	One Media Group
	1 x 1 Ihr Partner	Profil Werbe- & Verlagsgesellschaft
	1, 2, 3...Fertig!: Rezepte fuer jeden Tag	Bauer Media Group
1946-3073	1,012 G M A T Practice Questions	Princeton Review Publishing, L.L.C.
1943-4855	1,014 G R E Practice Questions	Princeton Review Publishing, L.L.C.
1943-4847	1,296 A C T Practice Questions	Princeton Review Publishing, L.L.C.
1902-7354	1. Raekke: Koebenhavns teatermagasin	Koebenhavns Teater
1902-7362	1. Raekke: Koebenhavns teatermagasin	Koebenhavns Teater
	1:100 000 Geological Information Series	Western Australia, Department of Industry and Resources
0727-1409	1:100 000 Geological Map Commentary	Northern Territory, Geological Survey
0811-6296	1:100 000 Geological Map Series. Explanatory Notes	Northern Territory, Geological Survey
1877-0150	10 Minuten	Reclassering Nederland
2197-697X	10 Minuten fuer Arbeitsschutz	V N R Verlag fuer die Deutsche Wirtschaft AG
	10 Point 5: arts magazine	Oz Publications
1833-3338	10,000 Steps Working Paper Series	Central Queensland University, Centre for Social Science Research
1835-3789	10,000 Steps Working Paper Series	Central Queensland University, Centre for Social Science Research
1724-9392	100 Anni di Italia in Automobile	De Agostini Editore
1558-5921	100 Best U.S. Wedding Destinations	The Globe Pequot Press, Insiders' Guide
1120-4958	100 Cose	R C S Periodici
0957-5367	100 Crosswords	Puzzler Media Ltd.
1546-7570	100 Decorating Ideas Under $100	Better Homes and Gardens, Special Interest Publications
1960-8039	100 Idees Actuelles	Republic Press International
2102-0876	100 Idees Deco	Groupe Marie Claire
0843-0403	100 Mile House Free Press	Cariboo Press
	100 Per Cent Mode	Comimpact Marketing
0873-4801	100 por Cento Jovem	Impala Sociedade Editorial
1851-3700	100 Porciento Luch	Producciones Publiexpress
	100 Winners Horses to Follow (Year)	Racing Post
	100 Wordsearch	Puzzler Media Ltd.
	100% Home Girls: guaranteed all-aussie amateur spunks	P B L Media Pty Ltd.
2014-6728	100% Mountain Biker	Panini Espana S.A.
1878-8211	100% NL Magazine	100% NL Magazine B.V.
2107-5131	100% Pratique: le magazine qui se mele de vous	Publicimo
1958-1947	100% Recettes	Mix Book
2105-3790	100% Vosges	Vega Communication
2118-3570	100% Vrai ! Hors-serie	Paperbox
2261-8554	100% Vrai ! Numero Special	Paperbox
2114-8961	100% Vrai !: la vie, la vraie, la votre	Paperbox
0322-9629	100+1: zahranicni zajimavost	Extra Publishing, s. r. o.
1212-6977	100+1: zahranicni zajimavost	Extra Publishing, s. r. o.
2105-6250	1000 Blagues	Euro Services Internet
1212-4710	1000 Reseni	Poradce s.r.o.
1335-4159	1000 Rieseni	Poradca s.r.o.
1608-6589	1000 und 1 Buch	Institut fuer Jugendliteratur
	1000 Videos	Editora Azul, S.A.
1540-3033	1000 World Leaders of Scientific Influence	American Biographical Institute, Inc., Governing Board of Editors
2152-8985	101 Best Deals You'll Find Online	CC Media Inc.
2000-3552	101 Nya Ideer	Bonnier Tidskrifter AB
	101 Wohntrends: Die Zeitschrift fuer junges wohnen	Wohnverlag GmbH
1568-3109	101 Woonideeen	Sanoma Media Netherlands B.V.
	1010 Magazine: a lifetime of success	1010 LLC
	10-4 Magazine	10-4 Magazine
1930-2363	1040 Preparation and Planning Guide	C C H Inc.
1933-4923	1041 Preparation and Planning Guide	C C H Inc.
	10-5155-20 Art Contemporain	Editions Alternatives
2244-9817	1066 (Online): tidsskrift for historie	Syddansk Universitetsforlag
	108 Review	108 Magazine, Inc.
2000-5350	10tal: tidskrift om litteratur och konst	Tidskriften 10tal
0959-2334	10th Muse	10th Muse
1860-0255	11 Freunde: Magazin fuer Fussball Kultur	11 Freunde Verlag GmbH & Co. KG
	11 Practice Tests for the S A T and P S A T	Princeton Review Publishing, L.L.C.
	11 x 30 - Broadside	Toledo Poets Center Press
2048-0539	1110: one photograph one story ten poems	Nottingham Poetry Series
2211-8225	112 Netwerk	Geen Blad voor de Mond B.V.
1663-6279	118 Swissfire.ch	Staempfli Verlag AG
	12 Maanden	C & B s.a.
	12 Seconds of Laughter	Mirth and Merriment Publications
2296-1763	12 Swiss Books	Pro Helvetia
1177-2379	12 to 24	Ministry of Youth Development
1178-3370	12 to 24	Ministry of Youth Development
1944-589X	1220 Fifth	Museum of the City of New York
0190-4744	1262 Banner	United Food and Commercial Workers Local 1262
	128 News	Reider Communications
1637-6900	128. Lettres	Armand Colin
1636-8622	128. Linguistique	Armand Colin
1636-8592	128. Sciences Sociales	Armand Colin
2194-0649	128: Das Magazin der Berliner Philharmoniker	Berliner Philharmoniker
	13(F) Institutional Portfolios	C D A Investment Technologies, Inc.
	13(F) Institutional Stock Holdings	C D A Investment Technologies, Inc.
	132 Expres	Subdireccion de Estudios Economicos y Marketing
0094-3320	13th Moon: a feminist literary magazine	13th Moon, Inc.
2045-970X	14-19 Learning & Skills Bulletin	The Education Publishing Co. Ltd.
1092-549X	15 Credibility Street	The Anti-Naturals
	15 Dias en Costa Rica	15 Dias en Costa Rica
	1585: Business Journal	corps - Corporate Publishing Services GmbH
0192-8597	1590 Broadcaster	1590 Broadcasting Corp.
0265-7066	16 Bit Computing	Paradox Group Ltd.
0138-645X	16 de Abril: organo cientifico estudiantil de las ciencias medicas de Cuba	Ministerio de Salud Publica, Instituto Superior de Ciencias Medicas de la Habana
1729-6935	16 de Abril: organo cientifico estudiantil de las ciencias medicas de Cuba	Ministerio de Salud Publica, Instituto Superior de Ciencias Medicas de la Habana
1603-5194	16:9: filmtidsskrift	16:9 Filmtidsskrift
1988-2963	1611: revista d' historia de la traduccio	Universitat Autonoma de Barcelona, Facultat de Traduccio i Interpretacio
1065-3112	1650 - 1850: Ideas, Aesthetics and Inquiries in the Early Modern Era	A M S Press, Inc.
1942-6631	1663: Los Alamos science and technology magazine	Los Alamos National Laboratory
1942-664X	1663: Los Alamos science and technology magazine	Los Alamos National Laboratory
0861-136X	168 Chasa	Media EOOD
0864-8581	168 Ora	Telegraf Kiado Kft.
1418-172X	168 Ora	Telegraf Kiado Kft.
1120-3072	18 Karati Gold & Fashion	Edizioni Gold s.r.l.
1923-8053	180 Degrees	Toronto International Film Festival Inc.
	1800 - 2000: Kulturgeschichten der Moderne	Transcript
	1814 Union News	A F L - C I O, International Longshoremen's Association, Local 1814
2045-4589	1883 Magazine	1883 Publishing
2045-4597	1883 Magazine	1883 Publishing
0769-0959	1895: revue d'histoire du cinema	Association Francaise de Recherche sur l'Histoire du Cinema
1960-6176	1895: revue d'histoire du cinema	Association Francaise de Recherche sur l'Histoire du Cinema
2198-1000	1899Freunde: Das Hoffenheim-Magazin	abcverlag GmbH
1758-3705	18up DVD	Trojan Publishing Ltd.
1598-3269	19 Se'gi Yeong'eo'gwon Munhag	19 Se'gi Yeong'eo'gwon Munhaghoe
1755-1560	19: interdisciplinary studies in the long nineteenth century	University of London, Birkbeck College, Centre for Nineteenth-Century Studies
1548-9914	1913: a journal of forms	1913 Press
	1932 Buick Registry	1932 Buick Registry
	1A: the Picks of the Week!	1A: the Picks of the Week!
1479-3342	1st on Video & DVD	Bleeding Edge Publishing
	1st Steps in the Hunt	Internet Business Network
	1st Steps: Daily Marketing and Design	Internet Business Network
1642-7602	2 + 3 D: grafika plus produkt - ogolnopolski kwartalnik projektowy	Fundacja Rzecz Piekna
2106-301X	2 Alpes Connexion	Dauphine Libere
2260-3190	2 C 2 A Mag'	Communaute de Communes de l'Argonne Ardennaise
	2 G: revista internacional de arquitectura	Editorial Gustavo Gili, S.A.
	2 Rad Schweiz (Bern)	S F M G V, Zentral Sekretariat
2260-2208	2 Rives de Seine	Communaute d'Agglomeration 2 Rives de Seine
1105-1299	2 Trochoi	Technical Press SA
0824-0868	2 x 4: all about word + more	Editions C.R. Inc.
1541-5066	2 Year Colleges	Thomson Peterson's
1540-0719	2.5 G-3 G	Information Gatekeepers, Inc.
1533-1679	2: hot male couples	Specialty Publications, LLC
	2: the only magazine for couples	2 For Life Media Inc.
1582-2583	20 Ani	Edipresse A.S. SRL
1757-7470	20 Best Local Walks	Local Living Ltd.
2173-8173	20 Casas. Manual	Globus Comunicacion
1887-5726	20 Casas. Seleccion	Globus Comunicacion
1699-8553	20 Casas: diseno interior	Globus Comunicacion
	20 de Mayo	20 de Mayo
	20 Leading Occupations of Employed Women	U.S. Department of Labor, Women's Bureau
	20 Load Magazine	20 Load Magazine
	20 Minuten Friday	20 Minuten Schweiz AG
	20 Minuten Schweiz	20 Minuten Schweiz AG
2109-1544	20 Minutes	20 Minutes France S.A.S.
1768-1391	20 Minutes (Bordeaux Edition)	20 Minutes France S.A.S.
2109-2192	20 Minutes (Grenoble Edition)	20 Minutes France S.A.S.
1762-5386	20 Minutes (Lille Edition)	20 Minutes France S.A.S.
1762-5416	20 Minutes (Lyon Edition)	20 Minutes France S.A.S.
1762-5424	20 Minutes (Marseille Edition)	20 Minutes France S.A.S.
2109-1277	20 Minutes (Montpellier Edition)	20 Minutes France S.A.S.
1771-1142	20 Minutes (Nantes)	20 Minutes France S.A.S.
2108-2529	20 Minutes (Nice Edition)	20 Minutes France S.A.S.
1632-1022	20 Minutes (Paris Edition)	20 Minutes France S.A.S.
2109-134X	20 Minutes (Rennes Edition)	20 Minutes France S.A.S.
1777-8301	20 Minutes (Strasbourg Edition)	20 Minutes France S.A.S.
1768-1405	20 Minutes (Toulouse Edition)	20 Minutes France S.A.S.
	20 Minuti	La Regione Ticino
1614-8290	20 Private Wohntraeume	I P M magazin-verlag GmbH
2150-6922	20 Rising Stars. Mutual Funds	Institutional Investor, Inc.
0192-1304	20/20	Jobson Medical Information, Llc.
	20/20	Canadian Table Tennis Association
1367-5982	20/20 Asia	Jobson International
	20/20 Brasil	Jobson Brasil Ltda.
1353-3290	20/20 Europe	Jobson International
	20_21: Das Magazin der Kunstsammlung Nordrhein-Westfalen	corps - Corporate Publishing Services GmbH
0262-284X	2000 A D: featuring Judge Dredd	Fleetway Editions
1593-0963	2000 Rivista Europea	Gangemi Editore
0864-800X	2000: irodalmi es tarsadalmi havi lap	Ketezer
1268-8533	2001 Plus	Centre de Prospective et de Veille Scientifique
	2020 Focus	International Food Policy Research Institute
1839-0161	2025 The Learning Continu-um-	NBRS + PARTNERS
	2029 Magazine	2029 Magazin
	20ish Parents	20ish Parents
1746-6512	20th Century History Review	Philip Allan Updates
1005-2984	21 Shiji	21 Shiji Zazhishe
	21 Shiji Jingji Baodao	Nanfang Baoye Chuanmei Jituan 21 Shijibao Xi
1672-8343	21 Shiji Shangye Pinglun	Nanfang Baoye Chuanmei Jituan 21 Shijibao Xi
1672-8327	21 Shiji Zhongxuesheng Zuowen	Hebei Jiaoyu Chubanshe
	21 Zwanzig	21 Zwanzig Verlag
1214-1097	21. Stoleti	R F Hobby s.r.o.
1801-6839	21. Stoleti Junior	R F Hobby s.r.o.
1759-281X	21: journal of contemporary and innovative fiction	Edge Hill University, Department of English and History
	210 S A: the sure for the ordinary	Prime Time, Inc
1525-2930	21st Century Adventures	21st Century Adventures, Inc.
2164-1870	21st Century Chinese Poetry	Pathsharers LLC.
2166-3688	21st Century Chinese Poetry	Pathsharers LLC.
1048-4124	21st Century Christian Magazine	20th Century Christian Foundation
2192-2942	21st Century Media Praxis and Cultural Narratives of Africa	Peter Lang GmbH
1534-3219	21st Century Music	21st-Century Music
	21st Century Science & Technology (Online)	21st Century Science Associates
2156-3675	21st Century Studies	Indiana University Press
	21st: The Journal of Contemporary Photography	21st: The Journal of Contemporary Photography
2258-4935	22 Bis Rue Pajol	Societe d'Economie Mixte d'Amenagement de l'Est de Paris
1479-1501	220 Triathlon	Immediate Media Company Origin Ltd.
	23 Club Series	Intrepid Press
2257-7955	24 Communes	Communaute de Communes de la Region de Chateau-Thierry
1754-6877	24 Frames	Wallflower Press
	24 Frames Per Second	24 Frames Per Second
1662-7644	24 Heures	Tamedia Publications Romandes
1719-4164	24 Heures (Montreal)	Sun Media Corporation
	24 Hour Fitness E-Magazine	24 Hour Fitness
0707-9389	24 Images	24 Images
1923-5097	24 Images	24 Images
2261-9852	24 Jours pour Preparer l'Oral	Editions Ellipses
1605-1319	24 Stunden fuer Wien: aktuelle Information ueber Energie und oeffentlichen Verkehr	Bohmann Druck und Verlag GmbH & Co. KG
	24 Stunden fuer Wien: aktuelle Information ueber Energie und oeffentlichen Verkehr	Bohmann Druck und Verlag GmbH & Co. KG
1864-3728	24 Stunden Gastlichkeit	B & L MedienGesellschaft mbH & Co. KG
2050-4489	24.7 Property Letting. News	24.7 Property Letting
1553-9989	24/7 Magazine	VeriFone Media Solutions
1845-3929	24sata	24sata d.o.o.
1845-4267	24sata	24sata d.o.o.
1847-7127	24sata Express	24sata d.o.o.
	24x7: technology and service solutions for biomeds	Allied Media, Llc.
	25 Beautiful Homes	I P C SouthBank
2303-9825	25 Magazine	25 Magazine
	25 Per Cent Rag	25 Per Cent Rag
1961-1935	25 Questions Decisives	Armand Colin
	250 Bad-Ideen	City Post Zeitschriftenverlags GmbH
	250 Umbau-Ideen	City Post Zeitschriftenverlags GmbH
	25ans	Hachette Fujingaho Co. Ltd.
	25ans Wedding	Hachette Fujingaho Co. Ltd.
0749-3851	2600: the hacker quarterly	2600 Enterprises, Inc.
	29 - Dvadtsat' Deviat	Izdatel'stvo Dvadtsat Deviat
1932-1937	29 C F R 1910 O S H A General Industry Regulations Book	Mangan Communications, Inc
1932-216X	29 C F R 1926 O S H A Construction Industry Regulations	Mangan Communications, Inc
	2Board: the official Athens airport magazine	Liberis Publications S.A.
	2D Artist	3DTotal.com Ltd.
2192-3884	2DArtist: Das Magazin fuer Concept Art, Digital & Matte Painting	Newart Medien & Design GbR
1950-3016	2e Guerre Mondiale	Editions Astrolabe
	2e: Twice-Exceptional Newsletter (Online)	Glen Ellyn Media
	2nd Chance	Freedom Communications, Inc.
	2nd Generation	Small Ave Publishing Ltd.
	2nd Home Journal	2nd Home Association
	2nd Home Specialist	2nd Home Association
1824-6621	2PN - Attualita Scientifica in Biologia della Riproduzione	Springer - Verlag Italia Srl
	2Raeder	Motor Presse Stuttgart GmbH und Co. KG
1548-1514	2Wheel Tuner	Advanstar Communications, Inc.
	2wice	2wice Arts Foundation, Inc.
	2X Provinz	No-Institute
2190-572X	3 Biotech	SpringerOpen
2190-5738	3 Biotech	SpringerOpen
1608-9383	3 C Mall	Jianduan Chuban Qufen Youxian Gongsi
1832-6161	3 C Media	CB Online
1078-2192	3 C On-line	Association for Computing Machinery, Inc.
2052-0638	3 Count Magazine	Karl Robinson, Ed. & Pub.
0953-2331	3 D	E M A P Computing
1342-2189	3 D Eizo	San Jigen Eizo no Foramu
1470-4382	3 D World: the magazine for 3D artists	Future Publishing Ltd.
1901-6654	3 F Fiskeren: medlemsblad for fiskernes landsklub	3F Fiskernes Landsklub
	3 F M	Royal National Institute of Blind People
1912-287X	3 Fois Passera	Communication-Jeunesse
1751-4797	3 G Wireless Broadband	Informa Telecoms & Media
1751-4800	3 G Wireless Broadband	Informa Telecoms & Media
2161-3087	3 Go Triathlon: fuel for the modern triathlete	Move Press, Llc
	3 I A	3 I A
0128-5157	3 L: The Southeast Asian Journal of English Language Studies	Penerbit Universiti Kebangsaan Malaysia
2043-6327	3 Lions	Bauer Media
2191-9798	3 R: Fachzeitschrift fuer sichere und effiziente Rohrleitungssysteme	Vulkan Verlag GmbH
	3 Stippen Varia	Nielsen Tijdschriften B.V.
	3 T Gazzettino Culturale	Lucania Filatelica Club
1063-0503	3 W Register of Chinese Business	3 W International Digital Publishing Corporation
1546-640X	3 x 3 Magazine: the magazine of contemporary illustration	3 x 3 Magazine
0779-8008	30 - 50. Berichtenblad	Centre d'Etudes et de Documentation Guerre et Societes Contemporaines
	30 - 50. Bulletin du Ceges	Centre d'Etudes et de Documentation Guerre et Societes Contemporaines
1828-793X	30 Buone Idee	Edizioni Idea Donna
	30 Day Notice - Tenant Tattler	Seattle Tenants Union
1974-3084	30 Giorni (Rome)	Federazione Nazionale Ordini Veterinari Italiani (F N O V I)
1974-3092	30 Giorni (Rome)	Federazione Nazionale Ordini Veterinari Italiani (F N O V I)
0390-4539	30 Giorni: nella chiesa e nel mondo	30Giorni
0984-4708	30 Millions d'Amis	Fondation 30 Millions d'Amis
2153-4683	30 West	Lake Country Publications
1813-3568	30 Zazhi	Tianxia Yuanjian Chuban Gunfen Youxian Gongsi
1851-5045	30,000 Revoluciones	Universidad Popular Madres de Plazo de Mayo
0762-3291	303: arts, recherches et creations	Association 303
1536-1519	306090: a journal of emergent architecture and design	Princeton Architectural Press
1751-6714	30up	Trojan Publishing Ltd.
1943-7463	32 Degrees	American Snowsports Education Association
	32 E Events	Service Employees International Union, Local 32E
1543-8945	32 Poems	32 Poems Magazine
2107-6537	3224 e-C R I T	Universite de Franche-Comte, Laboratoire L H P L E. e-CRIT3224
	328 Union Voice	United Food & Commercial Workers Union, Local 328
2157-5975	332nd Warrior Call	U S Army Reserve Medical Command, 332nd Medical Brigade
	337 Reporter	International Trade Commission Trial Lawyers Association
	33-i Kanal	33-i Kanal
	35 Millimeter: das Retro-Film-Magazin	35 Millimeter
	360 Degrees	Decorum
1085-1542	360 Degrees: Art & Literary Review	Hunting Creek Publishing
1869-8328	360 Grad Kanada	360 Grad Medien GbR
1866-797X	360 Grad Neuseeland: das Magazin mit der Rundum-Perspektive fuer Urlauber, Auswanderer und Professionals	360 Grad Medien GbR
2194-1939	360 Grad: zertifizierte Fortbildung fuer Aerzte	Medi Didac GmbH
2214-7659	360 Graden	Bever
	360 Live: das unabhaengige Xbox 360 Magazin	Airmotion Games Verlags GmbH
0245-3185	36000 Communes	Association des Maires Ruraux de France
2105-2980	36000 Communes	Association des Maires Ruraux de France
2051-669X	365 Cross Stitch Designs	Immediate Media Co. Ltd.
2165-5936	365 Devotions (Packet Edition)	Standard Publishing
2210-3813	365 Goddeloze Dagen	Veen Magazines
2246-2015	365design	Pej Gruppen - Scandinavian Trend Institute
2246-2619	365design	Pej Gruppen - Scandinavian Trend Institute
	371 Stadtmagazin	Cartell GbR Agentur fuer Citymedien
0761-7348	39 - 45 Magazine	Editions Heimdal
	39 Plus: for those of us who are no longer kids	Westchester Publications
2254-4143	3c Tecnologia	3ciencias
1759-9636	3D Artist: practical inspiration for the 3D community	Imagine Publishing Ltd.
	3D Creative	3DTotal.com Ltd.
2092-6731	3D Research	Springer
2109-5469	3DMag	Oracom
2193-9721	3E - Echt Evangelisch Engagiert: das Ideenmagazin fuer die Kirche	Bundes Verlag GmbH
1303-4782	3e Electrotech	Bilesim
2195-6677	3eins4: Das Alumni-Magazin der Technischen Universitaet Berlin	Technische Universitaet Berlin, Stabsstelle Presse, Oeffentlichkeitsarbeit und Alumni
1336-7366	3G Centrum	Rasco s.r.o.
1338-3345	3G Centrum	Rasco s.r.o.
2226-6070	3i: Intellekt, Idea, Innovatsiya	Kostanaiskii Gosudarsvennyi Universitet imeni Ahmeta Baitursynova
2107-4070	3K Akkro Karbone	Piste Noire
1926-8092	3PL Americas	J M Levi & Associates Ltd
1926-8114	3PL Canada	J M Levi & Associates Ltd
	3rd Floor Project: web resources for the art community	3rd Floor Project
	3rd Hit	3rd Hit
1444-691X	3rd Muse Poetry Journal	3rd Muse Publishing and Web Design
	3rd World Magazine	Jonathan Morris
	3sesenta: el mejor surf	3sesenta
1802-2162	3x Roman pro Zeny	Moravska Bastei MOBA, s.r.o.
1214-9276	3x Western Star	Moravska Bastei MOBA, s.r.o.
	4 Corners	U F M Worldwide
	4 Elements	Egret Press
1459-4463	4 H Pilke	Suomen 4H-Liitto
1942-6801	4 Health	Moo Publishing Corp.
1942-681X	4 Health	Moo Publishing Corp.
1614-2411	4 O R: quarterly journal of the Belgian, French and Italian operations research societies	Springer
1619-4500	4 O R: quarterly journal of the Belgian, French and Italian operations research societies	Springer
1105-1280	4 Trochoi	Technical Press SA
1105-1329	4 Trochoi Test	Technical Press SA
2213-0152	4 W D Magazine	K V Z Publications B.V.
	4 W D: internationales Allradmagazin und Allrad-Trucker	Exclusiv Verlagsgesellschaft mbH und Co. KG
	4 Wheel Action: the 4wd adventure magazine	Four Wheel Drive Club of Southern Africa
2325-3452	4 Wheel Drive & Sport Utility Magazine	Source Interlink Companies
0281-3580	4 Wheel Drive: terraeng & transpport	Foerlags AB Albinsson & Sjoeberg
1475-6188	4 x 4	Kelsey Publishing Ltd.
	4 x 4	Motorpress Hellas
1745-4700	4 x 4 & M P V Driver	M S Publications
	4 x 4 & Off Road Mart: the monthly place for 4x4 and accessories	Trinity Publications Ltd..
1178-9301	4 x 4 Action Adventure	4x4 Action Ltd.
	4 x 4 Allrad Markt	A M O Verlag GmbH
0726-2418	4 x 4 Australia	Bauer Media Group
2118-0946	4 x 4 Magazine	Editions Lariviere
2118-1039	4 x 4 Magazine. Hors-serie	Editions Lariviere
0779-9500	4 x 4 Plus (French Edition)	Plus Media
0779-9497	4 x 4 Plus (Nederlandse Edition)	Plus Media
1771-432X	4 X 4 Story	Sophie Roque Publicite
1775-9633	4 X 4 Story. Special Jeep	Sophie Roque Publicite
1449-6224	4 x 4 Trader	A C P Trader International Group
2306-8116	4.1.0 South Africa	Southern Fire Media
	40 Minutes: an I Q monthly	Delhi Shorthand School
	40 Plus	Trustar Ltee.
0963-7656	40 Plus	Fantasy Publications Ltd.
	40 por 50	40 por 50
1080-2142	401(k) Advisor: the insider's guide to plan design, administration, funding & compliance	Aspen Publishers, Inc.
1098-7169	401(k) Answer Book	Aspen Publishers, Inc.
1523-1828	401(k) Answer Book: Forms & Worksheets	Aspen Publishers, Inc.
	4080 Hip Hop Magazine	4080 Publishing
2193-7540	40inch	7-Sekunden
0710-3948	40-Mile County Commentator	Alberta Newspapers Group
1755-5647	40s	Trojan Publishing Ltd.
1475-5416	40up	Trojan Publishing Ltd.
	41 Degrees N	University of Rhode Island, Sea Grant College Program
1933-2084	411 Sports	Cedric E Lyons, Ed. & Pub.
1933-2092	411 Sports	Cedric E Lyons, Ed. & Pub.
1939-5337	417 Home	Whitaker Publishing, LLC
1538-9189	417 Magazine	Whitaker Publishing, LLC
	422 Tax Deductions For Businesses and Self-Employed Individuals	Bell Springs Publishing
	43rd Infantry Division Veterans Association. Bulletin	43rd Infantry Division Veterans Association
1079-1019	44th Street Notes	Association of the Bar of the City of New York
2013-3294	452 F: revista de teoria de la literatura y literaura comparada/journal of literary theory and comparative literature	Universitat Autonoma de Barcelona, Servei de Publicacions
1047-9333	48 - Ft: O Scale News: journal for 1/4" scale modelers	Gate VI Publishing Co.
	48 Degrees North: the sailing magazine	Boundless Enterprises, Inc.
1753-5794	49th Parallel: an interdisciplinary journal of North American studies	The University of Birmingham, Department of American and Canadian Studies
2009-129X	4Business	Durgan Media
2305-5111	4C: Magazin fuer Druck, Design, digitale Medienproduktion	Industriemagazin Verlag GmbH
2307-0838	4Change Magazine	4Change Foundation
2250-0669	4D International Journal of Management and Science	4D Cross Connect.com
	4D Pharma	Espicom Ltd.
0973-4341	4Ps Business and Marketing	IIPM Intelligence & Publications Unit
	4Rent.ca	Media Classified Corporation
	4's & 5's Family Fun	Standard Publishing
2214-3572	4-Stroke Magazine	Honda Vereniging Nederland
	4teachers.org: the online space for teachers integrating technology into classrom	University of Kansas, High Plains Regional Technology in Education Consortium
2213-8757	4W: Weten Wat Werld en Waarom	Stichting Kennisnet
2200-4513	4WD Touring Australia	Escape Media Pty. Ltd.
0946-2937	4Wheel Fun: das Gelaendewagen-Magazin	Motor Presse Stuttgart GmbH und Co. KG
1212-7043	4x4 Automagazin	Polygraf Net, s.r.o.
2258-5389	4x4 Tout-terrain Magazine	Editions D B D C
1504-3665	4x4guiden: autofilaarbok	Aller Media AS
1046-9826	5 AM: the magazine of contemporary poetry	05:00:00
	5 Asteria tis Asfalias	Motorpress Hellas
1948-2191	5 G E D Practice Tests	Princeton Review Publishing, L.L.C.
1940-6401	5 Ingredient Meals	Meredith Corporation
	5 Koleso	Izdatel'skii Dom S P N
2151-2787	5 Steps to a 5: A P Environmental Science	McGraw-Hill Professional
	5!: 5 Top-Themen!, 5x mehr wissen!	Blue Ocean Entertainment AG
1547-4364	5.0 Mustang & Super Fords	Source Interlink Companies
	50 & Over in Niagara	50 & Over in Niagara
1784-9306	50 + Lifestyle (Dutch Edition)	Editions Ventures
1784-9233	50 + Lifestyle (French Edition)	Editions Ventures
1357-3845	50 and Over!	Fantasy Publications Ltd.
1974-6156	50 Idee per Cucinare	Editrice Bonechi
	50 Plus Builder: the US resource for active adults, assisted living & senior apartment communities	Peninsula Publishing
2213-9427	50 Plus Gids	50 Plus Beurs
	50 Plus Living: residences and care options in the Susquehanna/Delaware Valleys	On-Line Publishers, Inc.
	50 Plus Monthly	Nortnic Inc.
	50 Plus News Magazine	50 Plus News Magazine
1087-979X	50 Plus Senior News (Bellport)	Frank C. Trotta, Ed. & Pub.
	50 Plus Senior News (Columbia): redefining age	On-Line Publishers, Inc.
0164-0356	50 State Legislative Review	Political Research, Inc.
1261-0674	50 Titres Sur...	Centre National de Documentation Pedagogique
2118-3155	50/51 Degres Nord	Observatoire Regional de la Sante - Nord - Pas-de-Calais
	50+ Housing: building for boomers & beyond	National Association of Home Builders, 50+ Housing Council
1871-7454	50+ in de Kijker	Uitgeverij Maypress
1098-3163	500 Notable Women	American Biographical Institute, Inc., Governing Board of Editors
2102-3794	5000 Ans d'Histoire Mysterieuse	Export Press
2103-6470	5000 Ans d'Histoire Mysterieuse. Hors-Serie	Export Press
1945-1121	501 Life: celebrating greater central Arkansas	501 Advertising and Publishing
1945-1156	501 Life: celebrating greater central Arkansas	501 Advertising and Publishing
1660-4830	50plus	Friedrich Reinhardt Verlag
1755-5655	50s	Trojan Publishing Ltd.
1050-6268	516 Magazine	516 Publishing, Inc.
	523 Woaishan	Zhonghua Minguo 523 Dengshanhui
1082-6815	5280: the denver's magazine	5280 Publishing Inc.
	52nd City	52nd City Media
2051-3712	53 Degrees	Excel Publishing Co Ltd.
2051-3720	53 Degrees	Excel Publishing Co Ltd.
2212-2699	55+ Magazine	D W G - De Grafische Wereld
2166-2487	5x5	Jennette Clark & Nicole Harlow, Eds. & Pubs.
2166-2495	5x5	Jennette Clark & Nicole Harlow, Eds. & Pubs.
1872-4264	6 Daagsen Statistieken	J.D. van Reijendam, Ed. & Pub.
	6 L: the premiere journal for Six Sigma and Lean professionals	Q S U Publishing Company
2118-2310	6 Millions de Malentendants	Association pour la Readaptation et la Defense des Devenus Sourds et Malentendants
1533-9459	6 Poets X 6 Pages	Ugly Duckling Presse
1574-7417	6 Surfing Magazine	Soul Media
1267-8066	60 Millions de Consommateurs: le magazine qui redonne le pouvoir aux consommateurs	Institut National de la Consommation
1479-2192	60 up	Trojan Publishing Ltd.
0328-8323	60 x 60 - Noticias de Medios y Comunicacion	Consignas - Comunicacion y Producciones Graficas
1132-2012	60 y Mas	Ministerio de Trabajo y Asuntos Sociales, Centro de Publicaciones
1878-4992	609 Cultuur en Media	Mediafonds - Stimuleringsfonds Nederlandse Culturele Mediaproducties
	60plusminus: Fuer Menschen, die das Leben kennen!	Cala Verlag GmbH & Co. KG
1755-5663	60s	Trojan Publishing Ltd.
2105-6404	62, le Journal du Pas-de-Calais	Conseil General du Pas-de-Calais
	630 News	Independent Federation of Flight Attendants
0205-8316	64 - Shakhmatnoe Obozrenie	Shakhmatnoe Obozrenie
0194-5025	68 Micro Journal	Computer Publishing, Inc.
	69 Degrees Magazine	69 Magazine Ltd.
1525-5336	7 Ball	Vox Publishing
1879-4254	7 Days	Uitgeverij Young & Connected
1607-1395	7 Dias	Revista 7dias
1578-3529	7 Dies: actualitat de vinaros	Premsa Andorrana S.A.
2171-8962	7 Esquinas	Centro de Estudios Linarenses
	7 Giun	7 Giun
0847-0952	7 Jours	Trustar Ltee.
1267-2572	7 Magazine Reunion	Tele Magazine Sept Reunion
1108-5673	7 Meres T V	Liberis Publications S.A.
1236-2409	7 Paivaa	Aller Julkaisut Oy
0037-461X	7 Tage: Deutschlands grosses Adelsmagazin	Klambt Verlag GmbH & Co. KG
1604-5130	7 TV Dage	Aller Media A/S
	7 x 7 Magazine	Hartle Media Ventures LLC
1941-1057	706/709 Preparation and Planning Guide	C C H Inc.
0306-6312	750 Bulletin	Seven Fifty Motor Club Ltd.
1940-8579	'76 Pyro: a magazine for people who love fireworks	'76 Pyro, LLC
0351-8485	7D	Vecer
1660-3591	7sky Magazin	7sky Publishing
1660-3605	7sky Magazin	7sky Publishing
1818-6661	7-Watch	Huashe Wenhua Shiye Gufen Youxian Gongsi
0129-3036	8 Days	MediaCorp Publishing
	8 de Marzo: dia internacional de la mujer	Universidad de Panama, Instituto de la Mujer
1931-0889	8 Ways to Avoid Probate	Nolo
	800 & Fax Travel Directory	World Travel Communications Inc.
	805 Living	3Digit Media, LLC
	805 Weddings	3Digit Media, LLC
0751-3879	813: Les Amis de la Litterature Policiere	Association des Amis de la Litterature Policiere
	850: the business magazine of northwest Florida	Rowland Publishing, Inc.
1104-8077	87: an Axelsson	Egmont Seriefoerlaget AB
0190-0277	8th District Dental Society. Bulletin	Eighth District Dental Society
1540-1448	9 Magazine: the porsche enthusiasts magazine	9 Magazine
1608-9650	9 Mesyatsev	Pressa Magazin
	9 to 5 National Association of Working Women. Newsline: 9to5 is building a movement to achieve economic justice, by engaging directly affected women to improve working conditions	9 to 5 National Association of Working Women
2105-6617	90 Minutes	Sports & Medias
2352-2453	90 Minutes	Blue Flower Media
0346-5233	91: an	Egmont Seriefoerlaget AB
0959-8782	911 and Porsche World	C H Publications Ltd.
1040-7316	9-1-1 Magazine	Official Publications, Inc.
	951 S.W.	McClain Publishing Co. LLC.
	951+: the magazine of Southern California's growth corridor	McClain Publishing Co. LLC.
1041-7230	976 Cities Plus	Todd E. Lewis, Ed. & Pub.
1828-8618	99 Idee Casa Raccolta	Di Baio Editore SpA
1125-1379	99 Idee Casa: 99 idee ...perche la centesima sia la tua	Di Baio Editore SpA
1592-0011	99 Idee Tech: 99 idee ...perche la centesima sia la tua	Di Baio Editore SpA
	99 News: the official magazine of the	The Ninety-Nines, Inc.
2042-8537	A	R I B A North West
1646-5393	A	Universidade de Coimbra, Escola Universitaria das Artes
	A - C Journal	Michigan Council for the Arts
1092-5600	A - E Marketing Journal	P S M J Resources, Inc.
0807-5654	A - Magasinet	Aftenposten AS
	A - Rivista	Editrice A
	A - Z de la Construccion y la Decoracion	Publicaciones Araguaney
	A - Z: United Arab Emirates Business Locations Guide	Al- Saqr Publishing House
2325-7237	A & A Case Reports	Lippincott Williams & Wilkins
	A & C Detail Book Series	A & C Publishing
1516-3210	A & C: revista de direito administrativo e constitucional	Editora Forum Ltda
	A & D Business	Aztex Inc.
	A & D Kompendium: Das Referrenzbuch fuer Automatisierungs- und Antriebstechnik	Publish-Industry Verlag GmbH
	A & D Lexikon: Begriffe & Kurzbezeichnungen aus der Automatisierungs- & Antriebstechnik	Publish-Industry Verlag GmbH
1076-6480	A & E Magazine: the magazine for awards & engraving professionals	National Business Media, Inc.
	A & E Publishing Worldwide E-Magazine	A & E Publishing
0328-381X	A & G	Argentine Oils and Fats Association
1878-7185	A & I	Prelum Uitgevers
1878-7207	A & I	Prelum Uitgevers
1075-816X	A & R Journal	A & R Journal
	A & T Register	North Carolina Agricultural and Technical University
1545-0554	A & U: America's AIDS magazine	Art & Understanding, Inc.
	A & V Elettronica	Consorzio Tecnoimprese
1093-9253	A & W M A Environmental Compliance News	Pergamon
1132-6409	A + T	A + T Editiones
0389-9160	A + U	Japan Architects Co., Ltd.
2240-0826	A 02 Scienze Fisiche	Aracne Editrice
2240-8436	A 10 Scienze dell'Antichita, Filologico - Letterarie e Storico - Artistiche	Aracne Editrice
1043-0121	A 2 L A (Year) Annual Report	American Association for Laboratory Accreditation
	A 2 L A (Year) Directory of Accredited Laboratories (Online)	American Association for Laboratory Accreditation
1040-9157	A 2 L A News	American Association for Laboratory Accreditation
	A 4. Autoruote 4 x 4	Cantelli Editore Srl
1064-4210	A A - B A Newsletter	American Anorexia - Bulimia Association, Inc.
	A A A A I News	American Academy of Allergy, Asthma & Immunology
0896-8217	A A A A News	American Association for Affirmative Action
	A A A A S F Newsletter	American Association for Accreditation of Ambulatory Surgery Facilities
	A A A Annual Report	American Arbitration Association
	A A A Arizona Highroads	American Automobile Association Arizona
	A A A C N Viewpoint	American Academy of Ambulatory Care Nursing
	A A A Carolinas Go Magazine	A A A Carolinas
0093-4062	A A A Digest of Motor Laws	A A A Government Relations
1098-3767	A A A Going Places (Pottstown)	Greenfield Printing & Publishing Co.
	A A A Going Places (Tampa): the magazine for today's traveler	A A A Auto Club South
	A A A Guide (Year)	American Anthropological Association
	A A A Horizons	A A A Southern New England
2169-4885	A A A Horizons Essex County	A A A Southern New England
	A A A I (Year) Proceedings	A A A I Press
	A A A Investment Guide	Wisebuy Publications
1527-2575	A A A Journeys	H & A Publishing
	A A A Letter	American Association for Applied Linguistics
1932-1775	A A A Living (Illinois/N. Indiana Edition)	American Automobile Association, Chicago Motor Club
1554-2130	A A A Living (Michigan Edition)	Automobile Club of Michigan
1932-1791	A A A Living (Minnesota)	American Automobile Association, Minnesota - Iowa Division
1554-2602	A A A Living (Wisconsin Edition)	American Automobile Association, A A A Wisconsin
1077-6060	A A A Motorist - Western Pennsylvania	American Automobile Association, A A A East Central
	A A A Motorist of Northeastern Pennsylvania	American Automobile Association of Northeastern Pennsylvania
2325-6028	A A A Motorist. Susquehanna Valley Region	American Automobile Association, A A A East Central
2169-3625	A A A Now!	A A A Northampton County
2325-064X	A A A Now! (Ohio)	A A A Northwest Ohio
	A A A Reading - Berks	Roberts & Company
0891-3153	A A A Road Atlas	American Automobile Association
	A A A S A Newsletter	Association for the Advancement of Agricultural Sciences in Africa
1557-0444	A A A S Annual Meeting	American Association for the Advancement of Science
1041-8857	A A A S Report: Research and Development	American Association for the Advancement of Science
	A A A Southern Traveler	Automobile Club of Missouri
1051-3701	A A A Today (Cincinnati)	Banta Publications
0890-7471	A A A Today (Greenfield)	Automobile Club Publications
	A A A Travel Topics	American Automobile Association, Central Pennsylvania Automobile Club
1075-668X	A A A Traveler (Allentown)	American Automobile Association, East Penn
2158-2424	A A A Western and Central New York. Member Connection	American Automobile Association, Western & Central New York
	A A A World (Hamilton)	American Automobile Association, Central - West Jersey Division
1523-7664	A A A World (Maryland)	A A A Mid-Atlantic, Inc.
1523-9403	A A A World (York)	American Automobile Association
1028-3072	A A A. Archivos de Arquitectura Antillana	Archivos de Arquitectura Antillana
2326-3741	A A B A N Y Law Review	Asian American Bar Association of New York
	A A B B News (Online)	American Association of Blood Banks
	A A B B Weekly Report (Online)	American Association of Blood Banks
	A A B Bulletin	American Association of Bioanalysts
1183-3165	A A B C Newsletter	Archives Association of British Columbia
	A A B C Newsletter	Afro - Asian Book Council
	A A Bed & Breakfast Guide (Year)	A A Publishing
1461-1694	A A Bed and Breakfast	Automobile Association
	A A B's Bibliography of Rare & Out-of-Print Titles for Sale	Magna Graecia's Publishers
1362-8534	A A B's British Bibliography of Rare & Out of Print Publications Reported Available For Sale This Week By the Legitimate Owners. By Subjects. Special Issue	Magna Graecia's Publishers
1362-8089	A A B's British Bibliography of Rare and Out-of-Print Titles Available	Magna Graecia's Publishers
	A A B's British Register of Wanted Publications	Magna Graecia's Publishers
	A A B's Guide to Italian Private English Language Schools & Italian Language Schools for Overseas & Italy	A A B British Book Help Services (Oxford)
1363-1993	A A B's Guide to Private English Language Schools in the U.K. for Overseas Students	Magna Graecia's Publishers
0966-2413	A A B's Register of Wanted Publications: updated daily	A A B British Book Help Services (Oxford)
	A A C C Bulletin	All Africa Conference of Churches
	A A C C Newsletter	American Automatic Control Council
1524-7244	A A C E Bonus Briefs: connecting careers, education, and work	American Association for Career Education
1074-9551	A A C E Careers Update: connecting careers, education and work	American Association for Career Education
1549-0181	A A C E Distinguished Member Series on Career Education: connecting careers, education, and work	American Association for Career Education
1528-7106	A A C E International Transactions	A A C E International
1551-3696	A A C E Journal: international forum on information technology in education	Association for the Advancement of Computing in Education
1527-2389	A A C G	American Association for Crystal Growth
	A A C I North	Association of Americans and Canadians in Israel
1559-7768	A A C N Advanced Critical Care	Lippincott Williams & Wilkins
1559-7776	A A C N Advanced Critical Care	Lippincott Williams & Wilkins
1948-7088	A A C N Bold Voices	American Association of Critical-Care Nurses
1948-7096	A A C N Bold Voices	American Association of Critical-Care Nurses
1055-8349	A A C N Nursing Scan in Critical Care	Nursecom, Inc.
1062-6514	A A C O G Region	Alamo Area Council of Governments
	A A C P A Newsletter	Asian American Certified Public Accountants
	A A C P News	American Association of Colleges of Pharmacy
1040-8924	A A C R A O Data Dispenser	American Association of Collegiate Registrars and Admissions Officers
1948-3279	A A C R Meeting Abstracts	American Association for Cancer Research
	A A C S B eNewsline	The Association to Advance Collegiate Schools of Business
	A A C S News Report	American Association of Cosmetology Schools
	A A D A News	Associated Antique Dealers of America
2325-1603	A A D E in Practice	Sage Publications, Inc.
0001-0073	A A E A Byline	American Agricultural Editors Association
0256-5048	A A E A Newsletter	African Adult Education Association
	A A F P News Now (Online): the family physician's trusted source for news	American Academy of Family Physicians
	A A F P News Now (Print)	American Academy of Family Physicians
0261-6823	A A Files	Architectural Association Inc.
	A A G B Road Atlas	Geographia Ltd.
0511-0726	A A G Bijdragen	Rural History, Wageningen University and Research Center
	A A G International	Eton Publishing
1926-3023	A A G Mag	Alberta Association on Gerontology
0275-3995	A A G Newsletter	Association of American Geographers
2153-5671	A A H A Annual Meeting. Proceedings	American Animal Hospital Association
1059-0005	A A H A Dialogue	American Association of Handwriting Analysts
1554-9534	A A H G S Historical Journal of the African American Experience in Arkansas	Afro-American Historical and Genealogical Society
1947-475X	A A H G S News	Afro-American Historical and Genealogical Society
	A A H O A Hospitality	Asian American Hotel Owners Association
1539-381X	A A H O A Lodging Business	France Publications, Inc.
1521-7558	A A H S A Continuing Care Retirement Community Salary & Benefits Report	Hospital & Healthcare Compensation Service
2151-3759	A A H S A Continuing Care Retirement Community Salary & Benefits Report	Hospital & Healthcare Compensation Service
1523-8164	A A H S A Nursing Home Salary & Benefits Report	Hospital & Healthcare Compensation Service
2151-3694	A A H S A Nursing Home Salary & Benefits Report	Hospital & Healthcare Compensation Service
0882-9365	A A H S Journal	American Aviation Historical Society
	A A Hotels, Lodges, Guest Houses, Bed & Breakfasts: south africa, namibia and other neighbouring states - south africa's best selling accomodation and touring guide	R & V Business Services (Pty) Ltd.
	A A I B Recommendations - C A A Progress Report (Year)	Civil Aviation Authority, Printing and Publication Services
0192-3315	A A I I Journal	American Association of Individual Investors
1442-701X	A A I M H I Newsletter	Australian Association for Infant Mental Health
1449-9509	A A I M H I Newsletter	Australian Association for Infant Mental Health
	A A I S Viewpoint	American Association of Insurance Services
	A A J A Newsletter	Asian American Journalists Association
	A A L A S in Action	American Association for Laboratory Animal Science
1838-1294	A A L I T R A Review	Australian Association for Literary Translation
	A A L L Directory and Handbook	American Association of Law Libraries
0065-7255	A A L L Publications Series	Fred B. Rothman & Co.
1089-8689	A A L L Spectrum	American Association of Law Libraries
	A A L R Reporter	American Association for Leisure & Recreation
1045-1730	A A L S Directory of Law Teachers	Association of American Law Schools
	A A L S News	Association of American Law Schools
0703-5276	A A L T Technician	Alberta Association of Library Technicians
1928-2567	A A L T Technician	Alberta Association of Library Technicians
1937-2981	A A M A Executive Online	American Academy of Medical Administrators
	A A M A Industry Statistical Review and Forecast	American Architectural Manufacturers Association
	A A M A Scope	American Architectural Manufacturers Association
	A A M A Update	American Architectural Manufacturers Association
	A A M Briefings Series	Anti-Apartheid Movement
	A A M C Curriculum Directory (Online)	Association of American Medical Colleges
1544-0532	A A M C Medical Reporter	Association of American Medical Colleges
1544-0540	A A M C Medical Reporter	Association of American Medical Colleges
	A A M C Survey of Housestaff Stipends, Benefits, and Funding	Association of American Medical Colleges
0739-0270	A A M I News	Association for the Advancement of Medical Instrumentation
0001-0146	A A M News	Technical Publications Malaya
1122-178X	A A M Terra Nuova: rivista ecoalternativa	Associazione A A M Terra Nuova
	A A M U C Footlocker	Association of American Military Uniforms Collectors
	A A Magazine	Redwood Publishing
	A A Magazine	Automobile Association of Zimbabwe
0305-0742	A A Members Handbook. Ireland	Automobile Association
0791-380X	A A Motoring	Automobile Association Ireland
2162-5239	A A N A Journal (Online)	A A N A Publishing, Inc.
0094-6354	A A N A Journal (Print)	A A N A Publishing, Inc.
	A A N I I. Trudy	Arkticheskii i Antarkticheskii Nauchno-Issledovatel'skii Institut
1934-645X	A A N S Neurosurgeon	American Association of Neurological Surgeons
1934-6468	A A N S Neurosurgeon	American Association of Neurological Surgeons
	A A N Today	American Association of Nurserymen
	A A O A Accents	Auxiliary to the American Osteopathic Association
	A A O A News	American Academy of Otolaryngic Allergy
	A A O B P P H Newsletter	American Association of Owners and Breeders of Peruvian Paso Horses
0746-620X	A A O H N News	American Association of Occupational Health Nurses, Inc.
	A A O M S Today	American Association of Oral and Maxillofacial Surgeons
1326-2270	A A O Observer	Anglo-Australian Observatory
1935-6765	A A O S Now	American Academy of Orthopaedic Surgeons
1935-6773	A A O S Now	American Academy of Orthopaedic Surgeons
	A A P A International Flexible Pavements Conference. Conference Proceedings	Australian Asphalt Pavement Association
0894-0509	A A P A News	American Academy of Physician Assistants
	A A P A Seaports	Seaports Publications Group
	A A P A Seaports of the Americas	Seaports Publications Group
2326-2575	A A P C Cutting Edge	American Academy of Professional Coders
	A A P E X Today	Babcox Publications, Inc.
0149-1423	A A P G Bulletin	American Association of Petroleum Geologists
0364-9849	A A P G Bulletin	American Association of Petroleum Geologists
1522-1423	A A P G Bulletin	American Association of Petroleum Geologists
1558-9153	A A P G Bulletin	American Association of Petroleum Geologists
0270-8043	A A P G Continuing Education Course Note Series	American Association of Petroleum Geologists
0195-2986	A A P G Explorer	American Association of Petroleum Geologists
0271-8529	A A P G Memoir	American Association of Petroleum Geologists
0271-8510	A A P G Studies in Geology Series	American Association of Petroleum Geologists
1099-6605	A A P Grand Rounds	American Academy of Pediatrics
1556-326X	A A P Grand Rounds	American Academy of Pediatrics
1545-0317	A A P I Nexus: policy, practice, and community	University of California, Los Angeles, Asian American Studies Center
1545-0325	A A P I Nexus: policy, practice, and community	University of California, Los Angeles, Asian American Studies Center
	A A P N News	American Apparel Producers' Network
1073-0397	A A P News	American Academy of Pediatrics
1556-3332	A A P News	American Academy of Pediatrics
	A A P O R News	American Association for Public Opinion Research
0218-2203	A A P P S Bulletin	Association of Asia Pacific Physical Societies
1934-5135	A A P Pediatric Coding Newsletter	American Academy of Pediatrics
1934-5143	A A P Pediatric Coding Newsletter	American Academy of Pediatrics
	A A P S Book Project Series	Malthouse Press Ltd.
8750-9687	A A P S News	Association of American Physicians & Surgeons, Inc.
1099-3606	A A P S Newsmagazine	American Association of Pharmaceutical Scientists
2155-7985	A A P S Newsmagazine	American Association of Pharmaceutical Scientists
1530-9932	A A P S PharmSciTech	Springer New York LLC
0277-1071	A A R Academy Series	American Academy of Religion
0893-8520	A A R C Times	American Association for Respiratory Care
	A A R D O Newsletter	Afro-Asian Rural Development
	A A R O T - A C O T News	Alberta College of Occupational Therapists
1044-1123	A A R P Bulletin	American Association of Retired Persons (A A R P)
0393-5183	A A R P Environment Design	Islamic Environmental Design Research Center
	A A R P Group By	American Association of Retired Persons (A A R P)
1541-9894	A A R P the Magazine	American Association of Retired Persons (A A R P)
2153-4039	A A R P Viva: a bilingual magazine	American Association of Retired Persons (A A R P)
	A A R S Journal	American Association of Railroad Superintendents
	A A R Worldwatch	Artists Against Racism
	A A S / A I A A Astrodynamics Conference. Proceedings	Univelt, Inc.
	A A S / G S F C International Symposium on Spaceflight Dynamics	Univelt, Inc.
1550-9850	A A S A Journal of Scholarship & Practice	American Association of School Administrators
1931-6569	A A S A Journal of Scholarship & Practice	American Association of School Administrators
	A A S H T O Journal: weekly transportation report	American Association of State Highway and Transportation Officials
2161-9638	A A S H T O Reference Book of Member Department Personnel and Committees	American Association of State Highway and Transportation Officials
0730-3564	A A S History Series	Univelt, Inc.
1046-5200	A A S Job Register	American Astronomical Society
	A A S L Hotlinks	American Library Association
0065-7417	A A S Microfiche Series	Univelt, Inc.
1445-2278	A A S Newsletter	Australian Anthropological Society
8750-9350	A A S Newsletter	American Astronomical Society
0732-6041	A A S P Newsletter	American Association of Stratigraphic Palynologists Foundation
2212-6716	A A S R I Procedia	Elsevier BV
2212-6724	A A S R I Procedia	Elsevier BV
0967-246X	A A S U Memo	University of Southampton, Department of Aeronautics and Astronautics
0404-4967	A A S U Report	University of Southampton, Department of Aeronautics and Astronautics
	A A Self-Catering Getaways: suites, chalets, national parks/reserves, caravan - resorts, b&bs - south africa, namibia and other neighbouring states	R & V Business Services (Pty) Ltd.
	A A T A Newsletter	American Art Therapy Association, Inc.
	A A T A Online: abstracts of international conservation literature	The Getty Conservation Institute
1532-8813	A A T C C Review	American Association of Textile Chemists and Colorists
0734-8894	A A T C C Technical Manual	American Association of Textile Chemists and Colorists
0883-6795	A A T F National Bulletin	American Association of Teachers of French
1943-6394	A A T I Newsletter	American Association of Teachers of Italian (A A T I)
1877-6906	A A T S Daily News	Elsevier BV
1877-6914	A A T S Daily News	Elsevier BV
0001-0251	A A T S E E L Newsletter	American Association of Teachers of Slavic and East European Languages
1095-8096	A A T T Bulletin	American Association of Teachers of Turkic Languages
	A A Travel Club Magazine	Automobile Association
	A A U G Monitor	Association of Arab-American University Graduates, Inc.
0855-0174	A A U Newsletter	Association of African Universities
0361-347X	A A U Official Track and Field Handbook	Amateur Athletic Union of the United States
	A A U P Book and Jacket Show	Association of American University Presses
2153-8492	A A U P Journal of Academic Freedom	American Association of University Professors
	A A U Reporter	American Immigration Lawyers Association
1044-5706	A A U W Outlook	American Association of University Women
	A A V S (Year) Annual Reports	American Anti-Vivisection Society
	A A V S O Alert Notice	American Association of Variable Star Observers
0516-9518	A A V S O Bulletin: predicted dates of maxima and minima of long period variables for (year)	American Association of Variable Star Observers
	A A V S O Eclipsing Binary Ephemerides	American Association of Variable Star Observers
0271-9053	A A V S O Journal	American Association of Variable Star Observers
	A A V S O Newsletter	American Association of Variable Star Observers
0271-8480	A A V S O Solar Bulletin	American Association of Variable Star Observers
	A A V S Reports	American Anti-Vivisection Society
	A A W C J C Newsletter	American Association of Women in Community and Junior Colleges
	A A W H Quarterly	American Association for World Health
	A ATouring Guide to England	Automobile Association
1871-3394	A B & V Reeks	Uitgeverij Paris bv
	A B 6	Editions Franc'Albert
1055-4017	A B A - UNIX - Group Newsletter	American Bar Association, Law Practice Management Section
1545-9845	A B A / B N A Lawyers' Manual on Professional Conduct	Bloomberg B N A
0740-4050	A B A / B N A Lawyers' Manual on Professional Conduct Current Reports	Bloomberg B N A
1521-5083	A B A / B N A Lawyers' Manual on Professional Conduct Current Reports	Bloomberg B N A
0887-0187	A B A Bank Compliance	American Bankers Association
1930-3963	A B A Bank Compliance	American Bankers Association
	A B A Bank Counsel Directory	American Bankers Association
1548-6958	A B A Bank Directors Briefing	Simmons-Boardman Publishing Corp.
2161-461X	A B A Bank Directors Briefing	Simmons-Boardman Publishing Corp.
1539-7890	A B A Bank Marketing	American Bankers Association
1081-9835	A B A Bank Security & Fraud Prevention	American Bankers Association, Security and Risk Management
1530-1125	A B A Bankers News	American Bankers Association
0194-5947	A B A Banking Journal	Simmons-Boardman Publishing Corp.
2161-5101	A B A Banking Journal	Simmons-Boardman Publishing Corp.
0277-3104	A B A Book Buyer's Handbook (Year)	American Booksellers Association, Inc.
2161-0649	A B A Child Law Practice	American Bar Association, Center on Children and the Law
2161-0657	A B A Child Law Practice	American Bar Association, Center on Children and the Law
	A B A Compliance Sourcebook: a manual for implementing and managing the compliance program	American Bankers Association
	A B A Consumer Banking Digest	American Bankers Association, Retail Service Center
	A B A Financial Institutions Directory	Accuity
0747-0088	A B A Journal	American Bar Association
2162-7983	A B A Journal	American Bar Association
	A B A Newsletter	American Bartenders' Association
1546-9581	A B A Newsletter (Kalamazoo)	Association for Behavior Analysis International
1729-5297	A B A Newsletter (Kalamazoo)	Association for Behavior Analysis International
	A B A R E Farm Surveys Results (Year)	Australian Bureau of Agricultural and Resource Economics and Science
1037-8286	A B A R E Research Reports	Australian Bureau of Agricultural and Resource Economics and Science
	A B A Today	African Businessmen's Association of Malawi
	A B A Trust & Investments	American Bankers Association
1524-4210	A B A Trust Letter	American Bankers Association
1930-4005	A B A Trust Letter	American Bankers Association
	A B A Washington Letter (Online)	American Bar Association, Governmental Affairs Office
	A B A Washington Summary (Online)	American Bar Association, Governmental Affairs Office
0107-4628	A B As Bibliografiske Serie	Arbejdermuseet og Arbejderbevaegelsens Bibliotek og Arkiv
1013-3119	A B B Review	A B B Corporate Management Services AG
2296-6218	A B B Review (Deutsche Ausgabe)	A B B Corporate Management Services AG
2296-6234	A B B Review (Ed. Espanola)	A B B Corporate Management Services AG
2296-6226	A B B Review (Ed. Francaise)	A B B Corporate Management Services AG
1013-316X	A B B Tidning	A B B Corporate Management Services AG
1213-9009	A B C	Ringier Axel Springer CZ a.s.
	A B C	Ringier Axel Springer CZ a.s.
1454-9778	A B C	Romania Azi S.A.
	A B C	Leszczynska Oficyna Wydawnicza
	A B C	Editions Coppieters S.P.R.L.
	A B C - Arab Trade Reference: Arab & Middle East Countries	A B C - Arab Trade Reference: Arab & Middle East Countries
	A B C - X Y Z	A B C - X Y Z
	A B C (Aragon Edition)	Prensa Espanola S.A.
	A B C (Asturias Edition)	Prensa Espanola S.A.
1696-912X	A B C (Barcelona Edition)	Prensa Espanola S.A.
1699-8383	A B C (Canarias Edition)	Prensa Espanola S.A.
	A B C (Cantabria Edition)	Prensa Espanola S.A.
2172-0533	A B C (Castilla - La Mancha Edition)	Prensa Espanola S.A.
1698-5052	A B C (Castilla y Leon Edition)	Prensa Espanola S.A.
1698-5079	A B C (Comunidad Valenciana Edition)	Prensa Espanola S.A.
1698-5060	A B C (Cordoba Edition)	Prensa Espanola S.A.
	A B C (Extremadura Edition)	Prensa Espanola S.A.
	A B C (Galicia Edition)	Prensa Espanola S.A.
1136-0143	A B C (Madrid Edition)	Prensa Espanola S.A.
	A B C (Murcia Edition)	Prensa Espanola S.A.
	A B C (Navarra Edition)	Prensa Espanola S.A.
1136-0208	A B C (Sevilla Edition)	Prensa Espanola S.A.
1139-7837	A B C (Sevilla Edition)	Prensa Espanola S.A.
1696-9111	A B C (Toledo Edition)	Prensa Espanola S.A.
1734-2392	A B C Alergii	Wydawnictwo Apteka
1642-445X	A B C Apteki: miesiecznik dla pacjentow aptek	Wydawnictwo Apteka
0775-6178	A B C Belge pour le Commerce et l'Industrie	A B C pour le Commerce et l'Industrie C.V.
	A B C Blue Book: Canadian Daily Newspapers	Audit Bureau of Circulations
	A B C Blue Book: Canadian Periodicals	Audit Bureau of Circulations
	A B C Blue Book: Canadian Weekly Newspapers	Audit Bureau of Circulations
	A B C Blue Book: U S and Canadian Business Publications	Audit Bureau of Circulations
	A B C Blue Book: U S and Canadian Farm Publications	Audit Bureau of Circulations
	A B C Blue Book: U S and Canadian Magazines	Audit Bureau of Circulations
	A B C Blue Book: U S Daily Newspapers	Audit Bureau of Circulations
	A B C Blue Book: U S Weekly Newspapers	Audit Bureau of Circulations
	A B C Collectors' Circle	Pastimes
1605-5705	A B C Color	A B C Color
1699-8375	A B C Cultura	Prensa Espanola S.A.
	A B C Cultura	Prensa Espanola S.A.
	A B C D E Focus	British Columbia Teachers' Federation
0044-5614	A B C Decor	Centre de Presse d'Information et de Promotion
1123-8925	A B C dei Giochi	Associazione Piccoli Operatori della Stampa
1576-1940	A B C Deportes	Prensa Espanola S.A.
0947-6148	A B C der Deutschen Wirtschaft - Quellenwerk fur Einkauf-Verkauf	ABC der Deutschen Wirtschaft GmbH
1605-0746	A B C Digital	A B C Color
1575-667X	A B C Economia	Fundacion San Agustin
1576-1916	A B C Economia (Sevilla Edition)	Prensa Espanola S.A.
0253-6463	A B C Enseignement des Droits de l'Homme	UNESCO Publishing
0944-5641	A B C Europ Production	ABC der Deutschen Wirtschaft GmbH
	A B C Executive Flight Planner: North America	Reed Travel Group
0891-8287	A B C Forum	American Book Council
1325-1465	A B C Gardening Australia	News Magazines Pty Ltd.
1575-1287	A B C Inmobiliario	Fundacion San Agustin
1575-1295	A B C Inmobiliario (Sevilla Edition)	Prensa Espanola S.A.
1683-8548	A B C Interactive English Magazine	LiveABC Interactive Corp.
0776-9954	A B C Luxembourgeois pour le Commerce et l'Industrie	A B C pour le Commerce et l'Industrie C.V.
1139-7829	A B C Madrid	Prensa Espanola S.A.
	A B C Magazine International	International Free-Lancers' Organization
1767-5936	A B C Neurologies	Expressions Groupe
	A B C News Bulletin	Audit Bureau of Circulations
0891-8775	A B C News Index	Primary Source Media
1089-0343	A B C News Transcripts	Aegis Rapidtext
	A B C Newsletter	Africa Bibliographic Center
1092-0412	A B C Newsletter	America's Blood Centers
1136-0127	A B C Nuevo Trabajo	Fundacion San Agustin
	A B C of Evidence	LexisNexis Butterworths
1832-6544	A B C of Offers	Victorian Tertiary Admissions Centre
1833-8585	A B C of Offers	Victorian Tertiary Admissions Centre
1006-1622	A B C Pinpin Dudu Huabao	Shanghai Jiaoyu Chubanshe
1733-3040	A B C Przeziebienia	Wydawnictwo Apteka
1575-1309	A B C Que De Que	Fundacion San Agustin
1576-1878	A B C Que de Sevilla	Prensa Espanola S.A.
	A B C Revista	A B C Color
1575-1279	A B C Salud	Fundacion San Agustin
1525-7800	A B C Soaps in Depth	Bauer Publishing Group
0253-6455	A B C Teaching Human Rights	UNESCO Publishing
0101-1960	A B C Z	Associacao Brasileira dos Criadores de Zebu
1451-1053	A B C. Casopis Urgentne Medicine	Srpsko Lekarsko Drustvo
	A B C: Anuario Brasileiro da Construcao	Engetec Ltda.
	A B C's of California Boating Law	Department of Navigation and Ocean Development
	A B C's of Making Money Online	Grafica Design
	A B C's of Net Marketing E-zine	A B C's of Net Marketing E-zine
1784-1976	A B D	Association Belge du Diabete
1518-2630	A B E M. Revista	Associacao Brasileira de Educacao Musical
1679-5954	A B E N O. Revista	Associacao Brasileira de Ensino Odontologico (A B E N O)
	A B E S P Boletim	Associacao Brasileira de Endodontia Seccao Sao Paulo
1367-885X	A B Europe	Centaur Media PLC
2212-022X	A B F Actueel	A B F Research B.V.
2326-1293	A B F Journal	Xander Media Group
2327-378X	A B F Journal	Xander Media Group
2212-6597	A B G P Magazine	Algemene Bond van Gemeente Personeel
	A B I - Auftrag, Rechnung, Zahlung	Verlag der Ingenieur GmbH
	A B I - B C I S House Rebuilding Cost Index	Building Cost Information Service Ltd.
	A B I - Risiken, Haftung, Schadenersatz	Verlag der Ingenieur GmbH
	A B I - Wirtschaft, Recht, Steuer	Verlag der Ingenieur GmbH
1931-7522	A B I Journal	American Bankruptcy Institute
	A B I T - Buero Heute	Verlagsanstalt Alexander Koch GmbH
0948-5430	A B I T International	Verlagsanstalt Alexander Koch GmbH
0720-6763	A B I Technik: Zeitschrift fuer Automation, Bau und Technik im Archiv, Bibliotheks- und Informationswesen	Walter de Gruyter GmbH
2191-4664	A B I Technik: Zeitschrift fuer Automation, Bau und Technik im Archiv, Bibliotheks- und Informationswesen	Walter de Gruyter GmbH
1320-6680	A B I X: Australasian Business Intelligence	Business Intelligence International Pty. Ltd.
	A B L Insider	American Beverage Licensees
	A B L Monthly Bulletin	Association of Banks in Lebanon
0104-0898	A B M Metalurgia e Materiais	Associacao Brasileira de Metalurgia e Materiais
	A B M S Plus	W.B. Saunders Co.
1046-7041	A B N F Journal	Tucker Publications, Inc.
2169-4133	A B N F Journal	Tucker Publications, Inc.
	A B O I Catalogue	Association of British Oceanic Industries
1414-8889	A B O P. Revista	Associacao Brasileira de Orientadores Profissionais
0874-2731	A B O: revista de medicina transfusional	Ministerio da Saude, Instituto Portugues do Sangue
	A B Organisation Marine Portfolio	A.B. Organisation Pty. Ltd.
0777-4761	A B P Contact	Association Belge des Paralyses
0001-0561	A B P I News	Association of the British Pharmaceutical Industry
1572-1728	A B P Magazine	Stichting Pensioenfonds ABP
1358-1783	A B P Ports Handbook	Associated British Port Holdings
	A B P Position Papers	Stichting Pensioenfonds ABP
1353-6869	A B P S News	The Association of British Philatelic Societies
1569-3341	A B P Wereld	A B P Public Affairs
	A B P Working Papers	Stichting Pensioenfonds ABP
1066-3878	A B Q Correspondent	A B Q Communications Corporation
1087-2302	A B Q Correspondent	A B Q Communications Corporation
0155-2864	A B R	Australian Book Review Inc.
1678-1805	A B R A L I N. Revista	Associacao Brasileira de Linguistica (A B R A L I N)
1676-9929	A B R A P L I P. Revista	Associacao Brasileira de Professores de Literatura Portuguesa (A B R A P L I P)
1359-088X	A B R E E S: journal of Russian & East European economic affairs	A B R E E S Ltd.
	A B S A M E Newsletter	Association for the Behavioral Sciences and Medical Education
	A B S E L News & Views	Association for Business Simulation and Experiential Learning
1220-3092	A B S I	Biblioteca Nationala a Romaniei
	A B T E C Koen Ronbunshu	Toryu Kako Gakkai
0126-6209	A B U Technical Review	Asia - Pacific Broadcasting Union
	A B V G D - Skazki, Igry i Uroki: detskaia roman-gazeta	Izdatelstvo A B V G D
1933-8317	A B Z: a new magazine of poetry	A B Z Press
1405-3136	A B Z: informacion y analisis juridicos	A B Z Editores S.A.
1710-209X	A Babord: revue sociale et politique	A Babord
2169-5016	A Bad Penny Review	A Bad Penny Review
	A Basic Music Library	Music Library Association
	A Bird's-Eye View	American Birding Association
0870-1776	A Bola	Sociedade Vicra Desportiva Lda.
1052-4681	A Brief Relation	Historic St. Mary's City Foundation, Inc.
	A Byte of Godly Counsel	The C12 Group
	A C	Central Dos Editores
0123-9058	A C - R Latinoamerica: la revista para las industrias de aire condicionado, calefaccion, refrigeracion y ventilacion	Latin Press Inc.
1076-6693	A C & Y H S News	Akron, Canton and Youngstown Railroad Historical Society
0709-4604	A C A Bulletin	Association of Canadian Archivists
	A C A L eNews	Australian Council For Adult Literacy
	A C A M H Occasional Papers	The Association for Child and Adolescent Mental Health
1956-2977	A C A M. La Lettre	Autorite de Controle des Assurances et des Mutuelles
2165-9591	A C A News	American Chiropractic Association
0826-497X	A C A News: the provincial newsletter for seniors	Alberta Council on Aging
	A C A R T S O D Monograph Series	African Centre for Applied Research and Training in Social Development
	A C A R T S O D Newsletter	African Centre for Applied Research and Training in Social Development
1933-2785	A C A Reflexions	American Crystallographic Association
	A C A S Bulletin (Online)	Association of Concerned Africa Scholars
0897-8050	A C A S I A	Association for Central Asian Studies
	A C A Transactions (Online)	American Crystallographic Association
	A C Autocaravan	Cantelli Editore Srl
1684-6079	A C B F Newsletter	African Capacity Building Foundation
1684-6087	A C B F Newsletter	African Capacity Building Foundation
1163-4979	A C B Infos	Association des Conservateurs de Bibliotheque
0959-9029	A C B National Meeting Proceedings	P R C Associates
1461-0337	A C B News: the monthly magazine for clinical science	The Association for Clinical Biochemistry
	A C C A Focus - Australia Newsletter	Association of Chartered Certified Accountants
	A C C A Focus - Canada Newsletter	Association of Chartered Certified Accountants
	A C C A Focus - Malaysia Newsletter	Association of Chartered Certified Accountants
	A C C A Focus - Pakistan Newsletter	Association of Chartered Certified Accountants
	A C C A Focus - Singapore Newsletter	Association of Chartered Certified Accountants
	A C C A Focus - U S A Newsletter	Association of Chartered Certified Accountants
	A C C A News	Air Conditioning Contractors of America
	A C C A Quality Contractor's Catalog of Materials, Products and Services	Air Conditioning Contractors of America
	A C C A Research Report	Association of Chartered Certified Accountants
	A C C A Research T & R. Occasional Research Paper	Association of Chartered Certified Accountants
0733-0448	A C C Basketball Handbook	U M I Publications, Inc.
1449-6712	A C C C eJournal (Online)	Australian Competition and Consumer Commission
1192-1846	A C C C International	Association of Canadian Community Colleges
1546-4776	A C C Docket	Association of Corporate Counsel
2157-5568	A C C Docket	Association of Corporate Counsel
1699-8057	A C C E	Asociacion Cultural Castillo de Embid
1699-8065	A C C E	Asociacion Cultural Castillo de Embid
1520-5959	A C C E L: audio journal of clinical cardiology	American College of Cardiology
1750-5984	A C C E O Matters	Leeds Media
0254-3133	A C C I S Newsletter	Information Systems Coordination Committe
	A C C J Directory	American Chamber of Commerce in Japan
	A C C L A I M Bulletin	Associated Chinese Chambers of Commerce and Industry of Malaysia
	A C C L L S Newsletter	Advancement Committee for Comparative Linguistics and Literary Studies
	A C C N Bulletin	Daily Journal of Commerce
1325-670X	A C C N S Journal of Community Nurses	Australian Council of Community Nursing Services
	A C C O S C A Newsletter	African Confederation of Savings and Credit Cooperatives
	A C C Plus	Lawbook Co.
1070-9169	A C C R A Cost of Living Index	A C C R A
2327-5618	A C C Sports.com Newsletter	Curtis Sports Media. LLC.
	A C Current	Amarillo College
	A C D A Newsletter	Association of Catholic Diocesan Archivists
1678-1899	A C D C en Acao	Associacao dos Cirurgioes Dentistas de Campinas
2027-1131	A C D I	Universidad del Rosario, Editorial
2145-4493	A C D I	Universidad del Rosario, Editorial
	A C D I - V O C A World Report	Agricultural Cooperative Development International, Volunteer in Overseas Cooperative Assistant
1709-853X	A C D I Marches	Canadian International Development Agency, Communications Branch
1063-4185	A C D News	American College of Dentists
1949-4335	A C D Tales	National Center for Atmospheric Research
0966-0763	A C D. The Journal of the Arthur Conan Doyle Society	Arthur Conan Doyle Society
1783-3639	A C E	Wolters Kluwer Belgique
	A C E C O M S News & Views	Asian Institute of Technology, A C E C O M S
0001-0669	A C E C Review	Ateliers de Constructions Electriques de Charleroi
2044-8635	A C E Discussion Papers	Association of Christian Economists
2162-0180	A C E E International Journal on Civil and Environmental Engineering	Institute of Doctors, Engineers and Scientists
2162-0199	A C E E International Journal on Civil and Environmental Engineering	Institute of Doctors, Engineers and Scientists
2162-0067	A C E E International Journal on Transportation and Urban Development	Institute of Doctors, Engineers and Scientists
2162-0075	A C E E International Journal on Transportation and Urban Development	Institute of Doctors, Engineers and Scientists
2042-6658	A C E Education Now	A C E Education Advice CIC & A C E Education Training
1082-0361	A C E FitnessMatters	American Council on Exercise
	A C E I D News	UNESCO, Principal Regional Office for Asia and the Pacific
0943-3945	A C E Lenkrad	A C E Verlag GmbH
	A C E National Guide to College Credit for Workforce Training	American Council on Education
1551-9171	A C E P News	Elsevier Society News Group
2328-8949	A C E P News	Elsevier Society News Group
1174-748X	A C E Papers	University of Auckland, Faculty of Education
1178-3354	A C E Papers	University of Auckland, Faculty of Education
2200-8918	A C E R Vocational Update	Australian Council for Educational Research
1646-8201	A C E S S. Directivas Tecnicas	Administracao Central do Sistemas de Saude
1646-8228	A C E S S. Guias	Administracao Central do Sistemas de Saude
1547-3716	A C E T Journal of Computer Education and Research	Association for Computer Educators in Texas
	A C F	Partido Nacional, A C F
0744-9631	A C F A Bulletin	American Cat Fanciers Association, Inc.
1045-8034	A C F Bulletin	American Checker Federation
0820-5949	A C F D Forum	Association of Canadian Faculties of Dentistry
	A C G A Multilogue	American Community Gardening Association
1020-5586	A C G C Chemical Research Communications	Asian Coordinating Group for Chemistry
0002-7952	A C H A Action	American College Health Association
0190-6631	A C H Newsletter	Association for Computers and the Humanities
1066-1727	A C H Newsletter	Association for Computers and the Humanities
1328-7133	A C H P E R Active and Healthy Magazine	Australian Council for Health, Physical Education and Recreation Inc.
1837-7378	A C H P E R Active and Healthy Magazine	Australian Council for Health, Physical Education and Recreation Inc.
1063-1410	A C H Participant Directory	Accuity
1869-0327	A C I	Schattauer GmbH
1031-8194	A C I A R Monograph Series	Australian Centre for International Agricultural Research
0813-7234	A C I A R Newsletter	Australian Centre for International Agricultural Research
1031-1009	A C I A R Partners Magazine: in research for development	Australian Centre for International Agricultural Research
1038-6920	A C I A R Proceedings	Australian Centre for International Agricultural Research
0816-7923	A C I A R Technical Reports Series	Australian Centre for International Agricultural Research
0819-7857	A C I A R Working Papers	Australian Centre for International Agricultural Research
1609-9885	A C I Digital	Agencia Catolica de Informaciones en America Latina
	A C I L Newsletter	American Council of Independent Laboratories
	A C I M Newsletter	American Committee on Italian Migration
0065-7875	A C I Manual of Concrete Practice	American Concrete Institute
0889-325X	A C I Materials Journal	American Concrete Institute
1944-737X	A C I Materials Journal	American Concrete Institute
	A C I News	Automobile Club Torino
1993-4939	A C I P S S Newsletter	Austrian Center for Intelligence, Propaganda and Security Studies
1327-5704	A C I R R T Working Paper	University of Sydney, Workplace Research Centre
	A C I S - Serie	Uitgeverij Paris bv
	A C I S Newsletter	American Conference for Irish Studies
0889-3241	A C I Structural Journal	American Concrete Institute
1944-7361	A C I Structural Journal	American Concrete Institute
1068-8021	A C J	American Chianina Association
	A C J S Employment Bulletin: for criminal justice - criminology positions	Academy of Criminal Justice Sciences
	A C J S Program Book	Academy of Criminal Justice Sciences
	A C J S Today	Academy of Criminal Justice Sciences
0969-4625	A C L A I I R Newsletter	Advisory Council on Latin American and Iberian Information Resources
1970-8343	A C L I Oggi	Associazioni Cristiane Lavoratori Italiani (A C L I)
0065-7972	A C L S Annual Report	American Council of Learned Societies
1041-536X	A C L S Occasional Papers	American Council of Learned Societies
	A C L U Cyber-Liberties Update	American Civil Liberties Union
	A C L U News	American Civil Liberties Union of Northern California
	A C M	Artists' Choice Museum
	A C M - I E E E Symposium on Volume Visualization	Institute of Electrical and Electronics Engineers
	A C M - S I G M I S - C P R Conference. Proceedings	Association for Computing Machinery, Inc.
0738-100X	A C M / I E E E Design Automation Conference. Proceedings	I E E E Computer Society
	A C M / I E E E International Workshop on Timing Issues in the Specification and Synthesis of Digital Systems. Proceedings	Association for Computing Machinery, Inc.
1552-5996	A C M / I E E E Joint Conference on Digital Libraries. Proceedings	Institute of Electrical and Electronics Engineers
1523-2867	A C M / S I G P L A N Notices	Association for Computing Machinery, Inc.
	A C M / S I G P L A N Symposium on Partial Evaluation and Program Manipulation. Proceedings	Association for Computing Machinery, Inc.
1834-1519	A C M A Communications Report	Australian Communications and Media Authority (A C M A)
	A C M A Newsletter	American Cutlery Manufacturers Association
1041-4517	A C M Annual Computer Science Conference. Proceedings	Association for Computing Machinery, Inc.
1541-6666	A C M Assets	Association for Computing Machinery, Inc.
0836-3463	A C M C Forum	Association of Canadian Medical Colleges
1932-2232	A C M Communications in Computer Algebra	Association for Computing Machinery, Inc.
1932-2240	A C M Communications in Computer Algebra	Association for Computing Machinery, Inc.
0360-0300	A C M Computing Surveys	Association for Computing Machinery, Inc.
1557-7341	A C M Computing Surveys	Association for Computing Machinery, Inc.
1543-7221	A C M Conference on Computer and Communications Security. Proceedings	Association for Computing Machinery, Inc.
	A C M Conference on Hypertext and Hypermedia. Proceedings	Association for Computing Machinery, Inc.
0976-5980	A C M E Journal of Management Brilliance	A C M E Institute of Management and Technology
	A C M Great Lakes Symposium on V L S I. Proceedings	Institute of Electrical and Electronics Engineers
	A C M Guide to Computing Literature (Online): bibliographic citations from major publishers in computing	Association for Computing Machinery, Inc.
2153-2184	A C M Inroads	Association for Computing Machinery, Inc.
2153-2192	A C M Inroads	Association for Computing Machinery, Inc.
1525-2477	A C M International Conference on Computational Linguistics. Proceedings	Association for Computing Machinery, Inc.
	A C M International Conference on Research in Computational Molecular Biology. Annual. Proceedings	Association for Computing Machinery, Inc.
1548-8403	A C M International Joint Conference on Autonomous Agents and Multiagent Systems. Proceedings	Association for Computing Machinery, Inc.
1558-2914	A C M International Joint Conference on Autonomous Agents and Multiagent Systems. Proceedings	Association for Computing Machinery, Inc.
1548-1832	A C M International Symposium on Mobile Ad Hoc Networking and Computing. Proceedings	Association for Computing Machinery, Inc.
	A C M International Workshop on Multimedia Databases. Proceedings	Association for Computing Machinery, Inc.
1527-6805	A C M Journal of Computer Documentation	Association for Computing Machinery, Inc.
1936-1955	A C M Journal of Data and Information Quality	Association for Computing Machinery, Inc.
1936-1963	A C M Journal of Data and Information Quality	Association for Computing Machinery, Inc.
1084-6654	A C M Journal of Experimental Algorithmics	Association for Computing Machinery, Inc.
1556-4673	A C M Journal on Computing and Cultural Heritage	Association for Computing Machinery, Inc.
1556-4711	A C M Journal on Computing and Cultural Heritage	Association for Computing Machinery, Inc.
1550-4832	A C M Journal on Emerging Technologies in Computing Systems	Association for Computing Machinery, Inc.
1550-4840	A C M Journal on Emerging Technologies in Computing Systems	Association for Computing Machinery, Inc.
0572-4252	A C M Monograph Series	Academic Press
	A C M P Ledger Lines	Amateur Chamber Music Players, Inc.
1542-7749	A C M Queue (Online)	Association for Computing Machinery, Inc.
1542-7730	A C M Queue (Print): tomorrow's computing today	Association for Computing Machinery, Inc.
	A C M R Newsletter	Association for Chinese Music Research
1094-3641	A C M S I G Ada Programming Language	Association for Computing Machinery, Inc.
1557-9476	A C M S I G Ada Programming Language	Association for Computing Machinery, Inc.
1947-4598	A C M S I G M M Records	Association for Computing Machinery, Inc.
1061-7264	A C M S I G P L A N Fortran Forum	Association for Computing Machinery, Inc.
1931-1311	A C M S I G P L A N Fortran Forum	Association for Computing Machinery, Inc.
	A C M Special Interest Group in Computer Graphics / Eurographics Symposium on Computer Animation. Proceedings	Association for Computing Machinery, Inc.
1055-6257	A C M Symposium on Computational Geometry. Annual Proceedings	Association for Computing Machinery, Inc.
0736-6663	A C M Symposium on Operating Systems Principles. Proceedings.	Association for Computing Machinery, Inc.
0737-8017	A C M Symposium on the Theory of Computing. Annual Proceedings	Association for Computing Machinery, Inc.
	A C M Transactions	Association for Computing Machinery, Inc.
1936-7228	A C M Transactions on Accessible Computing	Association for Computing Machinery, Inc.
1936-7236	A C M Transactions on Accessible Computing	Association for Computing Machinery, Inc.
1549-6325	A C M Transactions on Algorithms	Association for Computing Machinery, Inc.
1549-6333	A C M Transactions on Algorithms	Association for Computing Machinery, Inc.
1544-3558	A C M Transactions on Applied Perception	Association for Computing Machinery, Inc.
1544-3965	A C M Transactions on Applied Perception	Association for Computing Machinery, Inc.
1544-3566	A C M Transactions on Architecture and Code Optimization	Association for Computing Machinery, Inc.
1544-3973	A C M Transactions on Architecture and Code Optimization	Association for Computing Machinery, Inc.
1530-0226	A C M Transactions on Asian Language Information Processing	Association for Computing Machinery, Inc.
1558-3430	A C M Transactions on Asian Language Information Processing	Association for Computing Machinery, Inc.
1556-4665	A C M Transactions on Autonomous and Adaptive Systems	Association for Computing Machinery, Inc.
1556-4703	A C M Transactions on Autonomous and Adaptive Systems	Association for Computing Machinery, Inc.
1942-3454	A C M Transactions on Computation Theory	Association for Computing Machinery, Inc.
1942-3462	A C M Transactions on Computation Theory	Association for Computing Machinery, Inc.
1529-3785	A C M Transactions on Computational Logic	Association for Computing Machinery, Inc.
1557-945X	A C M Transactions on Computational Logic	Association for Computing Machinery, Inc.
1073-0516	A C M Transactions on Computer - Human Interaction	Association for Computing Machinery, Inc.
1557-7325	A C M Transactions on Computer - Human Interaction	Association for Computing Machinery, Inc.
0734-2071	A C M Transactions on Computer Systems	Association for Computing Machinery, Inc.
1557-7333	A C M Transactions on Computer Systems	Association for Computing Machinery, Inc.
1946-6226	A C M Transactions on Computing Education	Association for Computing Machinery, Inc.
0362-5915	A C M Transactions on Database Systems	Association for Computing Machinery, Inc.
1557-4644	A C M Transactions on Database Systems	Association for Computing Machinery, Inc.
1084-4309	A C M Transactions on Design Automation of Electronic Systems	Association for Computing Machinery, Inc.
1557-7309	A C M Transactions on Design Automation of Electronic Systems	Association for Computing Machinery, Inc.
	A C M Transactions on Economics and Computation	Association for Computing Machinery, Inc.
1539-9087	A C M Transactions on Embedded Computing Systems	Association for Computing Machinery, Inc.
1558-3465	A C M Transactions on Embedded Computing Systems	Association for Computing Machinery, Inc.
0730-0301	A C M Transactions on Graphics	Association for Computing Machinery, Inc.
1557-7368	A C M Transactions on Graphics	Association for Computing Machinery, Inc.
1094-9224	A C M Transactions on Information and System Security	Association for Computing Machinery, Inc.
1557-7406	A C M Transactions on Information and System Security	Association for Computing Machinery, Inc.
1046-8188	A C M Transactions on Information Systems	Association for Computing Machinery, Inc.
1558-2868	A C M Transactions on Information Systems	Association for Computing Machinery, Inc.
2157-6904	A C M Transactions on Intelligent Systems and Technology	Association for Computing Machinery, Inc.
2157-6912	A C M Transactions on Intelligent Systems and Technology	Association for Computing Machinery, Inc.
2160-6455	A C M Transactions on Interactive Intelligent Systems	Association for Computing Machinery, Inc.
2160-6463	A C M Transactions on Interactive Intelligent Systems	Association for Computing Machinery, Inc.
1533-5399	A C M Transactions on Internet Technology	Association for Computing Machinery, Inc.
1557-6051	A C M Transactions on Internet Technology	Association for Computing Machinery, Inc.
1556-4681	A C M Transactions on Knowledge Discovery from Data	Association for Computing Machinery, Inc.
1556-472X	A C M Transactions on Knowledge Discovery from Data	Association for Computing Machinery, Inc.
2158-656X	A C M Transactions on Management Information Systems	Association for Computing Machinery, Inc.
2158-6578	A C M Transactions on Management Information Systems	Association for Computing Machinery, Inc.
0098-3500	A C M Transactions on Mathematical Software	Association for Computing Machinery, Inc.
1557-7295	A C M Transactions on Mathematical Software	Association for Computing Machinery, Inc.
1049-3301	A C M Transactions on Modeling and Computer Simulation	Association for Computing Machinery, Inc.
1558-1195	A C M Transactions on Modeling and Computer Simulation	Association for Computing Machinery, Inc.
1551-6857	A C M Transactions on Multimedia Computing Communications and Applications	Association for Computing Machinery, Inc.
1551-6865	A C M Transactions on Multimedia Computing Communications and Applications	Association for Computing Machinery, Inc.
0164-0925	A C M Transactions on Programming Languages and Systems	Association for Computing Machinery, Inc.
1558-4593	A C M Transactions on Programming Languages and Systems	Association for Computing Machinery, Inc.
1936-7406	A C M Transactions on Reconfigurable Technology and Systems	Association for Computing Machinery, Inc.
1936-7414	A C M Transactions on Reconfigurable Technology and Systems	Association for Computing Machinery, Inc.
1550-4859	A C M Transactions on Sensor Networks	Association for Computing Machinery, Inc.
1550-4867	A C M Transactions on Sensor Networks	Association for Computing Machinery, Inc.
1049-331X	A C M Transactions on Software Engineering and Methodology	Association for Computing Machinery, Inc.
1557-7392	A C M Transactions on Software Engineering and Methodology	Association for Computing Machinery, Inc.
1550-4875	A C M Transactions on Speech and Language Processing	Association for Computing Machinery, Inc.
1553-3077	A C M Transactions on Storage	Association for Computing Machinery, Inc.
1553-3093	A C M Transactions on Storage	Association for Computing Machinery, Inc.
1559-1131	A C M Transactions on the Web	Association for Computing Machinery, Inc.
1559-114X	A C M Transactions on the Web	Association for Computing Machinery, Inc.
	A C M Washington Update	Association for Computing Machinery, Inc.
1933-7825	A C M Workshop on Geographic Information Retrieval. Proceedings	Association for Computing Machinery, Inc.
1559-419X	A C M Workshop on Next-Generation Residential Broadband Challenges. Proceedings	Association for Computing Machinery, Inc.
	A C M Workshop on Privacy in the Electronic Society. Proceedings	Association for Computing Machinery, Inc.
1931-1133	A C M Workshop on Rapid Malcode. Proceedings	Association for Computing Machinery, Inc.
1559-4459	A C M Workshop on Security of Ad Hoc and Sensor Networks. Proceedings	Association for Computing Machinery, Inc.
	A C M Workshop on Wireless Security. Proceedings	Association for Computing Machinery, Inc.
	A C M Workshop on X M L Security. Proceedings	Association for Computing Machinery, Inc.
1055-6338	A C M. S I G A C T - S I G M O D - S I G A R T Symposium on Principles of Database Systems. Proceedings	Association for Computing Machinery, Inc.
1558-1217	A C M. S I G C H I Bulletin (Online)	Association for Computing Machinery, Inc.
	A C M. S I G C O M M Internet Measurement Conference. Proceedings	Association for Computing Machinery, Inc.
1098-6154	A C M. S I G G R A P H Electronic Art and Animation Catalog	Association for Computing Machinery, Inc.
1098-6162	A C M. S I G G R A P H Electronic Art and Animation Catalog	Association for Computing Machinery, Inc.
1069-9236	A C M. S I G G R A P H Proceedings	Association for Computing Machinery, Inc.
	A C M. S I G G R A P H Proceedings	Association for Computing Machinery, Inc.
1931-4027	A C M. S I G G R A P H Symposium on Interactive 3D Graphics and Games. Proceedings	Association for Computing Machinery, Inc.
	A C M. S I G P L A N - S I G A C T Symposium on Principles of Programming Languages. Annual Conference Record	Association for Computing Machinery, Inc.
1531-7102	A C M. S I G P L A N Conference on Programming Language Design and Implementation. Proceedings	Association for Computing Machinery, Inc.
1542-0205	A C M. S I G P L A N Symposium on Principles and Practice of Parallel Programming	Association for Computing Machinery, Inc.
	A C M. S I G S I M International Conference on Modeling, Analysis and Simulation of Wireless and Mobile Systems. Proceedings	Association for Computing Machinery, Inc.
1539-7521	A C M. S I G S O F T International Symposium on the Foundations of Software	Association for Computing Machinery, Inc.
	A C Nielsen China Media Index	S R G China Ltd.
0743-8834	A C O A Action News	American Committee on Africa
1085-6862	A C O G Clinical Review	American College of Obstetricians and Gynecologists
1873-4383	A C O G Clinical Review	American College of Obstetricians and Gynecologists
1074-861X	A C O G Committee Opinions	American College of Obstetricians and Gynecologists
	A C O G Educational Bulletin	American College of Obstetricians and Gynecologists
1074-8601	A C O G Patient Education	American College of Obstetricians and Gynecologists
1099-3630	A C O G Practice Bulletin	American College of Obstetricians and Gynecologists
	A C O M Modate Quarterly	Association for Convention Operations Management
1521-0189	A C O N A Outdoor Adventure	The Pohly Co.
	A C O Newsletter	American College of Orgonomy
1750-8541	A C O R E New Energy Finance Briefing U S	Bloomberg New Energy Finance
1448-7535	A C O R N: the official journal of perioperative nursing in Australia	Cambridge Publishing
	A C O R Newsletter	American Center of Oriental Research
	A C O S C A News	Africa Cooperative Savings and Credit Association
0001-0790	A C O S News	American College of Osteopathic Surgeons
1442-486X	A C O S S Info	Australian Council of Social Service
1029-7065	A C P - E C Council of Ministers. Annual Report (Year)	European Commission, Office for Official Publications of the European Union
0138-6247	A C P A	Ediciones Cubanas
	A C P C Series	Great Britain. Department of Health
1938-632X	A C P Hospitalist	American College of Physicians
1938-6338	A C P Hospitalist	American College of Physicians
	A C P Internist	American College of Physicians
1056-8751	A C P Journal Club	American College of Physicians
1539-8560	A C P Journal Club	American College of Physicians
	A C P M Headlines (Online)	American College of Preventive Medicine
1547-1632	A C P Medicine	Decker Intellectual Properties
1547-1659	A C P Medicine	Decker Intellectual Properties
1548-9345	A C P Medicine (Loose-leaf)	Decker Intellectual Properties
1497-715X	A C P News	Alberta College of Pharmacists
	A C P Newslog	Associated Church Press
1876-0953	A C P Policy Brief	Technical Centre for Agricultural and Rural Cooperation
1547-1616	A C P Surgery	Decker Intellectual Properties
	A C R A Alert	American Car Rental Association
0790-391X	A C R A News	Aontacht Cumann Riartha Aitreabhthoiri
	A C R A Report	American Car Rental Association
2160-4754	A C R Bulletin	American College of Radiology
2160-4789	A C R Bulletin	American College of Radiology
1527-0106	A C R L New England Chapter Newsletter	Association of College and Research Libraries, New England Chapter
0193-1784	A C R L Publications in Librarianship	American Library Association
2224-9729	A C R N Journal of Entrepreneurship Perspectives	ACRN - Academic Collaboration and Research Network
2305-7394	A C R N Journal of Finance and Risk Perspectives	ACRN - Academic Collaboration and Research Network
	A C R Today Energy Saving Yearbook	Aydee Marketing Ltd.
	A C S - N S W eNews	Australian Computer Society Inc., New South Wales Branch
	A C S A Education Bulletin	Alaska Council of School Administrators
	A C S A Faculty Directory	Association of Collegiate Schools of Architecture, Inc.
1944-8244	A C S Applied Materials and Interfaces	American Chemical Society
1944-8252	A C S Applied Materials and Interfaces	American Chemical Society
2155-5435	A C S Catalysis	American Chemical Society
1554-8929	A C S Chemical Biology	American Chemical Society
1554-8937	A C S Chemical Biology	American Chemical Society
1948-7193	A C S Chemical Neuroscience	American Chemical Society
2156-8944	A C S Combinatorial Science	American Chemical Society
2156-8952	A C S Combinatorial Science	American Chemical Society
	A C S Digest	American Cryonics Society
	A C S E Newsletter	Association of Chinese Scientists and Engineers
2118-237X	A C S E. Rapport d'Activite	Agence Nationale pour la Cohesion Sociale et l'Egalite des Chances
	A C S H Media Update	American Council on Science and Health
2213-3046	A C S I FreeLife Magazine	Freelife Media B.V.
0747-9417	A C S M Bulletin: promoting advancement in surveying and mapping	American Congress on Surveying and Mapping
2161-1653	A C S Macro Letters	American Chemical Society
1948-5875	A C S Medicinal Chemistry Letters	American Chemical Society
1091-5397	A C S M's Health & Fitness Journal	Lippincott Williams & Wilkins
1536-593X	A C S M's Health & Fitness Journal	Lippincott Williams & Wilkins
1936-0851	A C S Nano	American Chemical Society
1936-086X	A C S Nano	American Chemical Society
2330-4022	A C S Photonics	American Chemical Society
2200-2294	A C S S A Research Summary	Australian Institute of Family Studies
2200-2308	A C S S A Research Summary	Australian Institute of Family Studies
1833-1483	A C S S A Wrap	Australian Institute of Family Studies, Australian Centre for the Study of Sexual Assault
1834-0148	A C S S A Wrap	Australian Institute of Family Studies, Australian Centre for the Study of Sexual Assault
	A C S S O Policy Document (Year)	Australian Council of State School Organisations, Inc.
2168-0485	A C S Sustainable Chemistry & Engineering	American Chemical Society
0097-6156	A C S Symposium Series	American Chemical Society
1947-5918	A C S Symposium Series	American Chemical Society
2161-5063	A C S Synthetic Biology	American Chemical Society
	A C S Victorian Bulletin	Australian Computer Society Inc., Victorian Branch
	A C S Zurich	Swiss Motor Club, International Werbung
2090-102X	A C S. Communications	Arab Computer Society
0968-6045	A C T	Ashram Community Trust
0971-0833	A C T	Ahmedabad Textile Industry's Research Association
	A C T 3 Review	A C T 3, Inc.
2160-3014	A C T 36: aiming for the perfect score	Barron's Educational Series, Inc.
0848-2497	A C T A Official Annual Directory	Agent Canada Magazine
2262-3817	A C T A P O L	A N R - A C T A P O L
	A C T Annual Report	A C T
1944-4842	A C T Comprehensive Program	Kaplan A E C Education
2167-9398	A C T E C Law Journal	American College of Trust and Estate Counsel
2167-9401	A C T E C Law Journal	American College of Trust and Estate Counsel
1939-3814	A C T E C Newsletter	American College of Trust and Estate Counsel
2108-1751	A C T E D News	Agence d'Aide a la Cooperation Technique et au Developpement (A C T E D)
0147-1236	A C T F L Foreign Language Education Series	American Council on the Teaching of Foreign Languages, Inc.
1647-2772	A C T Newsletter	Autoridade para as Condicoes do Trabalho (A C T)
1719-8127	A C T Newsletter	AIDS Committee of Toronto
1926-2590	A C T R A Magazine	Alliance of Canadian Cinema, Television and Radio Artists
	A C T Research Report Series	A C T
	A C T S News Clips	European Commission, Office for Official Publications of the European Union
1367-9856	A C T T News	Great Britain. Department for Business, Innovation & Skills
	A C U Bulletin	Association of Commonwealth Universities
	A C U Newsline	Auto Cycle Union
	A C U T A eNews	Association of College and University Telecommunications Administrators
	A C V Profil	Automobil-Club Verkehr
1327-2810	A C W A News	Association of Childrens Welfare Agencies, Inc.
	A C W A News	Association of California Water Agencies
	A C W R News	Archivists for Congregations of Women Religious
0778-8762	A C W Visie: weekblad van de christelijke arbeidersbeweging	Koepel van Christelijke Werknemersorganisaties
1942-2830	A California Companion for the Course in Wills, Trusts, and Estates	Aspen Publishers, Inc.
	A Call to Cud	Call to Cud
1888-3915	A Candea: revista do caurel	Asociacion Fonte do Milagro
	A Career In Aviation	British Women Pilots Association
	A Chau Thoi Bao: Vietnamese weekly newspaper	A Chau Thoi Bao
0361-7920	A Checklist of American Imprints	Scarecrow Press, Inc.
	A Child's Day: (Year) (Selected Indicators of Child Well-Being) (Online)	U.S. Census Bureau. Housing and Household Economic Statistics Division. Fertility & Family Statistics Branch
2155-3343	A Child's World	First Run Publishing, LLC
	A Co Far	Elsevier Espana
1933-5806	A Collection of in Chambers Opinions by the Justices of the Supreme Court of the United States	The Green Bag, Inc.
1574-8626	A Commentary on the United Nations Convention on the Rights of the Child	Martinus Nijhoff
1713-6768	A Commercial Tenancy Handbook	Carswell
	A Common Perspective	Joint War Fighting Center
1083-818X	A Common Place	Mennonite Central Committee
1931-0072	A Comprehensive List of Halal Food Products in U.S. and Canadian Supermarkets	Muslim Consumer Group For Food Products
	A Concise Overview: business valuation of small and midsize private companies	D.L. Perkins, LLC
	A Constant Threat	Constant Threat
1066-9914	A Contemporary Journal to Self-Discovery	Alana Lotharius, Ed. & Pub.
1548-7083	A Contracorriente	North Carolina State University, Department of Foreign Languages and Literatures
1989-7936	A Contrapalabra: revista de creacion literaria	Contrapalabra
1660-7880	A Contrario	Bangkok Services Network (BSN)
1662-8667	A Contrario	Bangkok Services Network (BSN)
1962-4646	A Contretemps	Conservatoire Maurice Ravel
	A Creative Newsletter	Creative Newsletter
1947-6264	A Critical Introduction to Media and Communication Theory	Peter Lang Publishing, Inc.
1081-468X	A Cross Stitch Christmas	Better Homes and Gardens, Special Interest Publications
2214-0808	A Cultural History of the Avant-Garde in the Nordic Countries	Editions Rodopi B.V.
2214-0816	A Cultural History of the Avant-Garde in the Nordic Countries	Editions Rodopi B.V.
0011-3255	A Current Bibliography on African Affairs	Baywood Publishing Co., Inc.
0990-977X	A D	Publications Conde Nast S.A.
2277-9868	A D	Conde Nast India Pvt. Ltd.
2046-3138	A D	National Society for Education in Art and Design
2043-0299	A D	A D Media Europe Ltd.
2049-3347	A D	A D Media Europe Ltd.
	A D A A Hot Sheet	Anxiety Disorders Association of America
	A D A Abstract Book	American Diabetes Association
1434-4335	A D A C AutoAtlas Deutschland - Europa	A D A C Verlag GmbH
2193-1356	A D A C Campingfuehrer. Deutschland, Nordeuropa	A D A C Verlag GmbH
2193-1364	A D A C Campingfuehrer. Suedeuropa	A D A C Verlag GmbH
	A D A C Freizeit Mobil	A D A C Verlag GmbH
	A D A C Handbuch: Schadenersatz bei Verletzung und Toetung	A D A C Verlag GmbH
0007-2842	A D A C Motorwelt	A D A C Verlag GmbH
1610-2290	A D A C Reisemagazin	A D A C Verlag GmbH
	A D A C Signale	A D A C Verlag GmbH
1866-5616	A D A C SkiGuide	A D A C Verlag GmbH
1054-5948	A D A Compliance Guide	Thompson Publishing Group
	A D A Compliance Manual for Employers	Michie Company
	A D A FastSearch: Americans with Disabilities Act reference guide	FastSearch Corporation
1015-5597	A D A Magazine	ADA Magazine
	A D A Newsletter	Anxiety Disorders Alliance
1414-7149	A D A P E C. Arquivos	Associacao Paranaense para o Desenvolvimiento do Ensino da Ciencia
1930-8728	A D A Professional Product Review	American Dental Association
1930-8736	A D A Professional Product Review	American Dental Association
	A D A R A Update (Online)	American Deafness & Rehabilitation Association (A D A R A)
0896-3134	A D A Today	Americans for Democratic Action
	A D A W A Newsletter	Australian Dental Association Inc., Western Australian Branch
	A D B Business Opportunities	Asian Development Bank
	A D B News	African Development Bank
	A D B Praxiswissen	Walter de Gruyter GmbH
	A D B Review	Asian Development Bank
1871-5044	A D C N Jaarboek	Art Directors Club Nederland
	A D C News	Automatic Identification Manufacturers U.S.A.
1875-1067	A D C Rapport	Archeologisch Diensten Centrum
2352-1430	A D C Rapport	Archeologisch Diensten Centrum
	A D C Report	Dairy Australia
0749-2642	A D C Times	American-Arab Anti-Discrimination Committee
2194-4954	A D Choice	Conde Nast Verlag GmbH
2104-1318	A D Collector	Publications Conde Nast S.A.
1084-5518	A D D - up	Listening Inc.
1133-8792	A D E - Teatro	Asociacion de Directores de Escena de Espana
	A D E Bulletin (Online)	Association of Departments of English
0001-8112	A D E G - Kaufmann	A D E G Handelsaktiengesellschaft
0001-8120	A D E G - Kurier: Kundenzeitschrift der Adeg-Kaufleute oesterr	Promotia-Zeitschriftenverlagsges. m.b.H.
1955-2742	A D E M E & Vous	Agence de l'Environnement et de la Maitrise de l'Energie (A D E M E)
1957-1992	A D E M E & Vous	Agence de l'Environnement et de la Maitrise de l'Energie (A D E M E)
1638-1564	A D E U S	Agence de Developpement et d'Urbanisme de l'Agglomeration Strasbourgeoise
	A D F F Newsletter	Australian Dairy Farmers Association
1443-1033	A D F Health	Australasian Medical Publishing Company Pty. Ltd.
1866-6116	A D H D - Attention Deficit and Hyperactivity Disorders	Springer Wien
1866-6647	A D H D - Attention Deficit and Hyperactivity Disorders	Springer Wien
2041-2215	A D H D in Practice	Hayward Medical Communications Ltd.
2045-7766	A D H D in Practice	Hayward Medical Communications Ltd.
1065-8025	A D H D Report	Guilford Publications, Inc.
1943-2747	A D H D Report	Guilford Publications, Inc.
1833-0576	A D H D Research Today	Research Today Publications
1853-0893	A D I N A Rosario. Anuario	A D I N A
	A D I T I Journal of Computational Mathematics	A D I T I International
	A D I T I Journal of Computer Science	A D I T I International
2277-7431	A D I T I Journal of Mathematical Physics	A D I T I International
1061-5202	A D L on the Frontline	Anti-Defamation League
2119-9809	A D M D. Journal	Association pour le Droit de Mourir dans la Dignite
1324-6550	A D M: serving the business of defence	Yaffa Publishing Group Pty Ltd.
2215-0404	A D Magazine	AD NieuwsMedia BV
	A D N O C News	Abu Dhabi National Oil Company, Public Relations Department
1941-3114	A D O B E Gold Canyon Ledger	Association for the Development of a Better Environment
1941-3122	A D O B E Gold Canyon Ledger	Association for the Development of a Better Environment
1839-0609	A D O H T A Journal	Australian Dental and Oral Health Therapists' Association
1887-1585	A D O Z	Universidad de Deusto, Departamento de Publicaciones
	A D P A Professional	Alcohol and Drug Problems Association of North America
1535-4326	A D R & the Law	American Arbitration Association
2225-7691	A D R A News	A D R A Oesterreich
	A D R A S A News Brief	Alternative Dispute Resolution Association of South Africa
	A D R E S. Annales d'Economie et de Statistique	Association pour le Developpement de la Recherche en Economie et en Statistique (A D R E S)
1208-9435	A D R Forum	C C H Canadian Ltd.
1719-8224	A D R Forum	C C H Canadian Ltd.
	A D R I D	Paul De Haen International
0300-7022	A D R I S Newsletter	Association for the Development of Religious Information Services
	A D S - M	American Dialect Society
	A D S C Membership Directory	Association of Drilled Shaft Contractors
	A D S C Products and Services Guide	Association of Drilled Shaft Contractors
	A D S C Technical Library Catalog	Association of Drilled Shaft Contractors
1771-7450	A D S P	Haut Conseil de la Sante Publique
1214-5769	A D Special: magazine pro mlade	Portal
	A D T A Newsletter	American Dance Therapy Association
0001-0960	A D T Transmitter	American District Telegraph Co.
	A D U K	Premiere Imprimerie Ukrainienne en France
0001-0987	A D V - Informationsdienst	Arbeitsgemeinschaft Deutscher Verkehrsflughaefen
1877-699X	A D Wereldhaven	AD NieuwsMedia BV
1123-9719	A D. Architectural Digest	Edizioni Conde Nast SpA
	A D: algemeen dagblad	AD NieuwsMedia BV
1488-8173	A Day in the Life of the Public Service of Canada	Leadership Network
1488-8181	A Day in the Life of the Public Service of Canada	Leadership Network
2155-3181	A Day on Health Law	Pennsylvania Bar Institute
0418-4513	A Debreceni Deri Muzeum Evkonyve	Deri Muzeum
0886-8476	A Delaware Sea Grant Technical Report	University of Delaware, Sea Grant College Program
	A Dictionary of Human Rights	Routledge
	A Dictionary of Modern Politics	Routledge
0162-8739	A Different Drummer: the poet's journal	Drummer Press
1559-5323	A Directory of History of Medicine Collections	U.S. National Library of Medicine
1133-1151	A Distancia	Universidad Nacional de Educacion a Distancia (U N E D)
2011-2610	A Domicilio	El Colombiano S.A. y Cia.
1619-6600	A E - Arbeitsrechtliche Entscheidungen	Deutscher Anwaltverlag GmbH
0561-0095	A E - South Carolina Crop and Livestock Reporting Service	Clemson University Experiment Station
0194-8849	A E A Advocate	Arizona Education Association
0459-8326	A E A Information Series	Louisiana Agricultural Experiment Station
0003-6668	A E Apparecchi Elettrodomestici	Tecniche Nuove SpA
0001-1010	A E B U	Asociacion de Bancos del Uruguay
1902-3782	A E Bladet	Arbejderbevaegelsens Erhvervsraad
1825-893X	A E C	Amicizia Ebraico-Cristiana di Firenze
1133-3871	A E C C	Asociacion Espanola Contra el Cancer
	A E C Finance News	ZweigWhite
1929-6371	A E C L Nuclear Review	Atomic Energy of Canada Ltd.
1929-8056	A E C L Nuclear Review	Atomic Energy of Canada Ltd.
0067-0367	A E C L Report Series	Atomic Energy of Canada Ltd., Chalk River Laboratories
	A E C Magazine: design, management & collaboration in the built environment	X3D Media
1697-0217	A E D E M Bibliometrica	Academia Europea de Direccion y Economia de la Empresa
	A E E Energy Insight: news and information for the energy professional	Association of Energy Engineers
1623-944X	A E F A. Association des Entraineurs Francais d'Athletisme	Association des Entraineurs Francais d'Athletisme (A E F A)
0899-5788	A E G News	Association of Environmental & Engineering Geologists
	A E I Newsletter	The Energy and Resources Institute (T E R I)
	A E I O U	Bundesministerium fuer Bildung, Wissenschaft und Kultur
1825-828X	A E I T	Federazione Italiana Elettrotecnica, Elettronica, Automazione, Informatica e Telecomunicazioni
0747-8909	A E J M C News	Association for Education in Journalism and Mass Communication
1935-0007	A E L E Monthly Law Journal	Aele Law Enforcement Legal Center
1137-8174	A E L F A. Boletin	Grupo Ars XXI de Comunicacion, SA
1695-0224	A E L F A. Boletin	Grupo Ars XXI de Comunicacion, SA
0090-2411	A E Legal Newsletter	Victor O. Schinnerer & Co.
1729-3561	A E M I Journal	Association of European Migration Institutions
1684-3576	A E N Infos	Organisation for Economic Cooperation and Development (O E C D), Nuclear Energy Agency
1605-959X	A E N Infos (Print)	Organisation for Economic Cooperation and Development (O E C D), Nuclear Energy Agency
1177-3472	A E N Journal	Wairua Consulting
1435-6074	A E P	Vieweg und Sohn Verlagsgesellschaft mbH
	A E P Appointments Broadsheet	Association of Educational Psychologists
1713-8663	A E P H Rapport	Manitoba Family Services and Housing
	A E P Online	The Association of Educational Publishers
1827-9171	A E Parts & Components	Tecniche Nuove SpA
0311-6999	A E R	Springer Netherlands
2210-5328	A E R	Springer Netherlands
1827-5842	A e R	Centro di Riabilitazione Extraospedaliera Paolo VI
1944-0014	A E R A Gram: ground breaking archaeology	Ancient Egypt Research Associates, Inc.
1944-0022	A E R A Gram: ground breaking archaeology	Ancient Egypt Research Associates, Inc.
1046-0993	A E R O Sun Times	Alternative Energy Resources Organization
	A E R Report	Association for Education and Rehabilitation of the Blind and Visually Impaired
1071-6947	A E S	A S M E International
1549-4950	A E S	Audio Engineering Society
	A E S C Directory	Association of Energy Service Companies
	A E S F Annual Technical Conference Proceedings (CD-ROM Edition)	American Electroplaters and Surface Finishers Society, Inc. (AESF)
1365-9200	A E S I E A P Goldbook (Year)	Charlton Media Group
	A E S Regional Convention, Tokyo Preprints	Audio Engineering Society, Japan Section
1972-0505	A E S T	C E D A M
	A E S: materiali, studi e argomenti di etnografia e storia sociale	Associazione di Etnografia e Storia Sociale
1832-6870	A E T A Journal	Asian Education Teachers Association
0066-9784	A E T F A T Index: releve des travaux de phanerogamie systematique et des taxons nouveaux concernant l'Afrique au sud du Sahara et Madagascar	Association pour l'Etude Taxonomique de la Flore d'Afrique Tropicale (A E T F A T)
1442-1321	A E U News - Victoria	Australian Education Union, Victorian Branch
1434-8411	A E Ue: International Journal of Electronics and Communication	Urban und Fischer Verlag
	A E V E-News (Email)	Art Education Victoria
	A E: Canadian Aesthetics Journal - Revue Canadienne d'Esthetique	Canadian Society for Aesthetics - Societe Canadienne d'Esthetique
2171-8830	A Economia Galega	Fundacion Caixa Galicia
2171-8849	A Economia Galega	Fundacion Caixa Galicia
0046-1814	A Eletronica em Foco	Amplie Editora S-C Ltda.
1901-3728	A ERaadet. Beretning	Arbejderbevaegelsens Erhvervsraad
1901-3736	A ERaadet. Beretning	Arbejderbevaegelsens Erhvervsraad
0044-5657	A F - Architekturforum: Zeitschrift fuer Architektur, Design und Wohnkultur	A F - Architekturforum
	A F A A Newsletter	Association of Faculties of Agriculture in Africa
0901-6996	A F A Danmark Fireblokke	A F A - Forlaget
0901-7003	A F A Danmark, Faeroeerne, Groenland, Dansk Vestindien Frimaerkekatalog	A F A - Forlaget
1398-9898	A F A Danmark, Faeroeerne, Groenland, Dansk Vestindien Frimaerkekatalog	A F A - Forlaget
0222-674X	A F A E: administration et education	Association Francaise des Administrateurs de l'Education
	A F A Journal	American Family Association
1049-6181	A F A N Newsletter	Matrix Software
	A F A Newsletter	American Forensic Association
0901-6643	A F A Oesteuropa Frimaerkekatalog	A F A - Forlaget
	A F A R Annual Report	American Foundation for AIDS Research
	A F A Record	Amateur Football Alliance
0901-6635	A F A Skandinavien Frimaerkekatalog	A F A - Forlaget
1395-0320	A F A Specialkatalog: Danmark, Faeroeerne, Groenland, Dansk Vestindien og Slesvig	A F A - Forlaget
0901-702X	A F A Vesteuropa Frimaerkekatalog	A F A - Forlaget
0199-543X	A F A Watchbird	American Federation of Aviculture
	A F B Directory of Services Database	American Foundation for the Blind
	A F B eNews	American Foundation for the Blind
0930-8199	A F B Info	Arbeitsstelle Friedensforschung Bonn
1449-5937	A F B M Journal	Charles Sturt University, A F B M Network
1449-7875	A F B M Journal	Charles Sturt University, A F B M Network
	A F C O M's Annual Survey of Data Processing Operations Salaries	D C M S, Inc.
	A F D A Forum	American Fish Decoy Association
2118-3260	A F D A S	A F D A S
2117-6299	A F D D. Bulletin	Association Francaise des Docteurs en Droit
1961-7038	A F E I Financial Newsletter	Association Francaise des Entreprises d'Investissement (A F E I)
1088-7253	A F E Newsline	Association for Facilities Engineering
2261-5288	A F E R P. Les Cahiers	Association Francaise d'Etudes des Relations Professionnelles
0250-4650	A F E R: African ecclesiastical review	AMECEA Gaba Publications
1217-7040	A F E S Z Magazin	Altalanos Fogyasztasi es Ertekesito Szovetkezetek
	A F E T Veroeffentlichungen	Arbeitsgemeinschaft fuer Erziehungshilfe (AFET) e.V.
0932-8874	A F E T Wissenschaftliche Informationsschriften	Arbeitsgemeinschaft fuer Erziehungshilfe (AFET) e.V.
1445-243X	A F F H O Newsflash	Australasian Federation of Family History Organisations
	A F F H O Newsflash	Australasian Federation of Family History Organisations
	A F F I Business Insights	American Frozen Food Institute
	A F F I Letter	American Frozen Food Institute
	A F F Journal	Method Publishing
1041-5335	A F G E Government Standard	A F L - C I O, American Federation of Government Employees
	A F H H A Insider	American Federation of Home Health Agencies
	A F H R C Factsheets	Agriculture Canada, Kentville Research Station
	A F I A Safetygram	American Feed Industry Association
	A F I Buying Directory	P G R A Inc.
1959-4593	A F I D E O. News	Association Francaise pour l'Information et la Defense des Sourds s'Exprimant Oralement
0160-6344	A F I P Atlas of Tumor Pathology	American Registry of Pathology
0498-3564	A F I P Letter	Armed Forces Institute of Pathology
	A F I Shot Show Magazine	P G R A Inc.
	A F K - Friedenschriften	Nomos Verlagsgesellschaft mbH und Co. KG
0149-2489	A F L - C I O American Federationist	A F L - C I O
	A F L - C I O Now	A F L - C I O
	A F L - C I O. Convention Proceedings	A F L - C I O
1384-282X	A F L A Quarterly	Africa Legal Aid
	A F L Preview	American Media, Inc.
1444-2973	A F L Record	Slattery Media Group
2308-0647	A F M A Matrix	Plaas Publishing
0155-1221	A F M Exploratory Series	University Of New England, Department of Accounting and Financial Management
0819-2898	A F M Information Systems Series (No.)	University of New England
	A F Magazine	Bite the Bullet Media Group
1710-9396	A F N Echo	L' Assemblee des Premieres Nations
1941-4501	A F P C Council Review: an update for friends of the American Foreign Policy Council	American Foreign Policy Council
	A F P C Issue Paper	Agricultural and Food Policy Center
2154-977X	A F P D Bottom Line	Associated Food & Petroleum Dealers
1528-4077	A F P Exchange	Association for Financial Professionals
0198-7461	A F P Family Practice Annual	American Academy of Family Physicians
	A F P P Newsletter	Association for Perioperative Practice
0949-2100	A f P: Zeitschrift fuer Medien und Kommunikationsrecht	Verlag Dr. Otto Schmidt KG
0001-1193	A F R A Boletin Informativo	Asociacion Filatelica de la Republica Argentina
	A F R A News	Association for Rural Advancement
	A F R A Special Reports	Association for Rural Advancement
1834-2434	A F R C Briefing	Australian Family Relationships Clearinghouse
	A F R C Institute of Engineering Research. Report	Silsoe Research Institute
	A F R C Institute of Engineering Research. Translations	Silsoe Research Institute
0001-1207	A F R E	Editorial Ofice
	A F R M A Chapters - Rules & Guidelines	American Fancy Rat and Mouse Association
0250-8443	A F R O Technical Report Series	World Health Organization, Regional Office for Africa
1946-9497	A F S C M E 93 News	American Federation of State, County and Municipal Employees
1936-7562	A F S C M E Works	A F L - C I O, American Federation of State, County & Municipal Employees
	A F S Newsletter	American Filtration and Separations Society
	A F S Newsletter	Atlanta Freethought Society
1948-6944	A F S Public Programs Bulletin	Western Kentucky University, Programs in Folk Studies
	A F T A Monitor	Options Publishing Services
1048-9959	A F T E Journal	Association of Firearm and Tool Mark Examiners
1120-205X	A F T: rivista di storia e fotografia	Archivio Fotografico Toscano
1747-4183	A F V Modeller	A F V Modeller Ltd.
1430-2713	A F Z - Der Wald: Zeitschrift fuer Waldwirtschaft und Umweltvorsorge	Deutscher Landwirtschaftsverlag GmbH
1615-9845	A F Z Journal	Deutscher Fachverlag GmbH
0942-8062	A F Z. Allgemeine Fleischer-Zeitung. OB	Deutscher Fachverlag GmbH
0942-8070	A F Z. Allgemeine Fleischer-Zeitung. OBMS	Deutscher Fachverlag GmbH
0942-8046	A F Z. Allgemeine Fleischer-Zeitung. OBS	Deutscher Fachverlag GmbH
0942-8054	A F Z. Allgemeine Fleischer-Zeitung. OBSMW	Deutscher Fachverlag GmbH
0942-8089	A F Z. Allgemeine Fleischer-Zeitung. OBSMWN	Deutscher Fachverlag GmbH
1553-1597	A FalconGuide to Dinosaur National Monument	The Globe Pequot Press, Inc.
1553-9598	A FalconGuide to Everglades National Park and the Surrounding Area	Falcon Publishing
	A FalconGuide to Saguaro National Park & the Santa Catalina Mountains Guide Book	Falcon Publishing
1553-958X	A FalconGuide to the Mount Baker-Mount Shuksan Area	The Globe Pequot Press, Inc.
1553-1112	A FalconGuide to the San Juan Islands	Falcon Publishing
0237-4323	A Falu	Agroinform Kft.
2164-182X	A Few Lines Magazine	Rough Writers Publications
0874-8616	A Filatelia Portuguesa: revista filatelica	Clube Nacional de Filatelia
1177-6544	A Fine Line	New Zealand Poetry Society
0824-1961	A Friend Indeed: for women in the prime of life	A Friend Indeed Publications Inc.
	A G / B I A Decisions Listing (Online)	U.S. Department of Justice, Executive Office for Immigration Review, Board of Immigration Appeals
0001-1274	A G A	Asociacion General de Agricultores
1784-2417	A G A B	Association des Geologues Amateurs de Belgique
	A G A eDigest	American Gastroenterological Association
	A G A Financial Quarterly Review	American Gas Association
8756-5471	A G A Gas Energy Review	American Gas Association
	A G A Gas Industry Training Directory	American Gas Association
1554-3366	A G A Perspectives	American Gastroenterological Association
1555-7502	A G A Perspectives	American Gastroenterological Association
0376-4435	A G A R D Manual	North Atlantic Treaty Organization, Research and Technology Organization
	A G A R D Reports	North Atlantic Treaty Organization, Research and Technology Organization
	A G A R D Technical Programme	North Atlantic Treaty Organization (N A T O), Advisory Group for Aerospace Research and Development
	A G A Rate Service	AUS Inc
	A G A Synthetic Pipeline Gas Symposium. Proceedings	American Gas Association
0833-0603	A G A T E	Alberta Teachers' Association
	A G A The Natural Resource Newsletter	American Gas Association
	A G A Training Update	American Gas Association
2279-5057	A G About Gender: rivista internazionale di studi di genere	Universita degli Studi di Genova
1290-3930	A G B Newsletter	International Astronomical Union
	A G B U Magazine	Armenian General Benevolent Union
1081-0161	A G Bulletin	National Association of Attorneys General
	A G C News Service	Associated General Contractors of Houston
1839-9223	A G D A Bulletin	Dairy Australia
1834-7517	A G D Alumni Factsheet	Australian Government. Attorney-General's Department
1834-7525	A G D Alumni Factsheet	Australian Government. Attorney-General's Department
	A G D Impact	Academy of General Dentistry
1864-7421	A G D Viertel	Allianz Deutscher Designer e.V.
0001-1320	A G E C O - Documentation Siderurgique	Agence Industrielle et Economique
1561-8366	A G E F I Luxembourg	A G E F I Luxembourg S.A.
	A G E S	Asociacion de Garajes y Estaciones de Servico
1290-4996	A G F Magazine	Assurances Generales de France
	A G H Drilling, Oil, Gas	Wydawnictwo A G H
0890-278X	A G H E Exchange	Association for Gerontology in Higher Education
0001-1339	A G I E S	Camara Oficial de Comercio de Espana en Italia
	A G I F Forumeer	American G I Forum
	A G I F O R S Annual Symposium Proceedings	International Federation of Operational Research Societies, Airline Group
0809-3334	A G I Norsk Grafisk Tidsskrift	Norske Media AS
1180-4939	A G I R	Association Generale des Insuffisants Renaux (A G I R)
1478-2707	A G I Source Book for Geographic Information Systems (CD-ROM)	Association for Geographic Information
	A G L Magazine	Biby Publishing, LLC
0002-0990	A G M A Zine	American Guild of Musical Artists
	A G News	Associated Grocers of Colorado Inc.
1944-4427	A G P C Quarterly	Association of Game and Puzzle Collectors
0948-8758	A G P Mitteilungen: Zeitschrift fuer Partnerschaft in der Wirtschaft	Arbeitsgemeinschaft Partnerschaft in der Wirtschaft e.V.
0001-1355	A G R A News	Allied Gasoline Retailers Association of Florida, Inc.
1139-9635	A G R Coleccionistas de Cine	Editorial El Gran Caid
	A G R R: Auto Glass Replacement & Repair: the magazine driving the auto glass industry	Key Communications, Inc.
	A G S Guides	Alpine Garden Society
	A G S News	Alpine Garden Society
	A G S Quarterly	Association for Gravestone Studies
1720-0296	A G U I News	C I C Edizioni Internazionali
1080-305X	A G U Reference Shelf Series	American Geophysical Union
	A G V A Newsletter	American Guild of Variety Artists
1058-9112	A Gathering of the Tribes: the multicultural arts magazine	A Gathering of the Tribes
	A Girl's World	A Girl's World Productions, Inc.
	A Granja	Editora Centaurus Ltda.
	A Guide for Madrichim	Pedagogic Center, Department for Jewish Zionist Education
	A Guide for Postgraduate Studentship Award Holders in the Arts and Humanities	Arts and Humanities Research Council
2153-4748	A Guide to Acquiring Wisdom	Wendell Prowse, Ed. & Pub.
	A Guide to Art & Design Courses	Trotman & Co. Ltd.
	A Guide to Grants for Individuals in Need (Year)	Directory of Social Change
2305-2996	A Guide to Intellectual Property Law	Juta & Company Ltd., Juta Law
1836-148X	A Guide to the Australian Government: structure, organisations and key people	Australian Government. Information Office. Department of Finance and Deregulation
1495-6047	A Guide to the Personal Information Protection and Electronic Documents Act	LexisNexis Canada Inc.
	A Guide to the Use of Herbicides	South Africa. Department of Agriculture. Directorate Food Safety and Quality Assurance
	A Guide to Toxic Torts	Matthew Bender & Co., Inc.
	A Guide to U S Government Information	U.S. Government Printing Office
1924-0392	A Guide to Winnipeg for Aboriginal Newcomers	Partners for Careers
0072-8829	A Guidebook of United States Coins	Whitman Publishing, LLC
	A H & L A Buyers Guide	American Hotel & Lodging Association
2192-1636	A H A - Zeitschrift	Event Horizon
1041-956X	A H A F Journal	American Handwriting Analysis Foundation
	A H A Guide	American Hospital Association
	A H A M Major Appliance Factory Shipment Report	Association of Home Appliance Manufacturers
0891-6608	A H A News (Chicago)	Health Forum, Inc.
	A H A News (Denver)	Professional Association of Therapeutic Horsemanship International
	A H A News Now: the daily report for health care executives	American Hospital Association
1947-8844	A H A P Insider	H C Pro, Inc.
1948-0520	A H A P Staff Challenge	H C Pro, Inc.
8755-500X	A H A! Hispanic Arts News	Association of Hispanic Arts
0279-1692	A H C A Notes	American Health Care Association
0213-1226	A H C I E T Revista de Telecomunicaciones	Asociacion Iberoamericana de Centros de Investigacion y Estudio de Telecomunicaciones
	A H C News	American Horse Council, Inc.
0746-133X	A H E P A N	Order of Ahepa
1775-8297	A H F Huntington France: aimer, c'est agir	Association Huntington France
0177-5472	A H F Mitteilungen	Arbeitskreis fuer Hausforschung e.V.
1063-8792	A H F S Drug Information	American Society of Health-System Pharmacists
	A H F S Drug Information Essentials	American Society of Health-System Pharmacists
1523-2425	A H I M A Advantage	American Health Information Management Association
1551-8442	A H I P Coverage: health care news, views, trends and insights	America's Health Insurance Plans
1949-9035	A H L A Connections	American Health Lawyers Association
1949-9043	A H L A Connections	American Health Lawyers Association
2155-2916	A H L A's Federal Healthcare Laws & Regulations	LexisNexis
	A H N: the voice of the progressive African American in Hawaii	Rainbow Bridge Consultants
1890-8799	A H O Works	Arkitektur- og Designhoegskolen i Oslo
	A H P A News	American Horse Protection Association, Inc.
	A H P Perspective	Association for Humanistic Psychology
	A H R A Link	The Association for Medical Imaging Management
	A H R A Record	Alberta Health Records Association
0001-1436	A H R C Chronicle	Association for the Help of Retarded Children, New York City Chapter
	A H R M M Conference Proceedings	American Hospital Association
1559-4068	A H R Q Publications Catalog	U.S. Department of Health and Human Services, Agency for Healthcare Research and Quality (A H R Q)
1537-0224	A H R Q Research Activities	U.S. Department of Health and Human Services, Agency for Healthcare Research and Quality (A H R Q)
2167-3381	A H R Q Research Activities	U.S. Department of Health and Human Services, Agency for Healthcare Research and Quality (A H R Q)
1556-4193	A H R Q Web M & M	U.S. Department of Health and Human Services, Agency for Healthcare Research and Quality (A H R Q)
1912-8215	A H S C A News for Parents on School Council	Alberta Home and School Councils' Association
1552-2938	A H S International. Annual Forum. Proceedings	A H S International
2167-1265	A H S International. Annual Forum. Proceedings	A H S International
2167-1281	A H S International. Annual Forum. Proceedings	A H S International
	A H S Journal	Arthur Holmes Society
1948-7479	A H S Pulse: the applied health science newsletter	Indiana University, Department of Applied Health Science
	A Handbook of Korea	The Korean Culture and Information Service (K O I S)
1222-7994	A Het	A Het
	A Het Turke	A Het Turke
	A History of Everyday Life in Scotland	Edinburgh University Press Ltd.
1215-0665	A Hus	Orszagos Husipari Kutatointezet Kht.
	A I	Nguyen & Associates
	A I - Aggregates International	Ad-Media GmbH
0951-5666	A I & Society: journal of knowledge, culture and communication	Springer U K
1435-5655	A I & Society: journal of knowledge, culture and communication	Springer U K
1606-0911	A I A	Ediciones Sudamericanas, S.R.L.
	A I A - D C News	American Institute of Architects, Washington Chapter
	A I A A - A S M E - A S C E - A H S - A S C Structures, Structural Dynamics, and Materials Conference. Collection of Technical Papers (Online)	American Institute of Aeronautics and Astronautics, Inc.
	A I A A - A S M E Thermophysics and Heat Transfer Conference. Proceedings	American Institute of Aeronautics and Astronautics, Inc.
1537-0186	A I A A Annual Report	American Institute of Aeronautics and Astronautics, Inc.
	A I A A Guidance, Navigation and Control Conference - Technical Papers	American Institute of Aeronautics and Astronautics, Inc.
0001-1452	A I A A Journal: devoted to aerospace research and development	American Institute of Aeronautics and Astronautics, Inc.
1081-0102	A I A A Journal: devoted to aerospace research and development	American Institute of Aeronautics and Astronautics, Inc.
1533-385X	A I A A Journal: devoted to aerospace research and development	American Institute of Aeronautics and Astronautics, Inc.
	A I A A Student Journal (Online)	American Institute of Aeronautics and Astronautics, Inc.
	A I A A Technical Meeting Papers	American Institute of Aeronautics and Astronautics, Inc.
	A I A F. Rivista	Associazione Italiana degli Avvocati per la Famiglia e per i Minori (A I A F)
0737-1675	A I A Journal	Association of Indians in America
1322-9869	A I A L Forum	Australian Institute of Administrative Law
1832-4037	A I A L National Lecture Series on Administrative Law	Australian Institute of Administrative Law
2215-0862	A I A Magazine	Stichting Agape
	A I A Michigan Monthly Bulletin	American Institute of Architects, Michigan Chapter
	A I A P Quaderni	Associazione Italiana Creativa Comunicazione Visiva
2210-6219	A I A S Newsletter	Amsterdam Institute for Advanced Labour Studies
0728-859X	A I A S Occasional Publication	Australian Institute of Agricultural Science and Technology
	A I A Update	Aerospace Industries Association
	A I A Update	Sema Publications
1079-3933	A I Architect	American Institute of Architects
	A I B Global Broadcasting Sourcebook	Association for International Broadcasting
1938-9590	A I B Insights	Academy of International Business
1938-9604	A I B Insights	Academy of International Business
1520-6262	A I B Newsletter	Academy of International Business
	A I B Plus	Bund-Verlag GmbH
	A I B Review	Allied Irish Banks Ltd.
2239-6144	A I B Studi: rivista italiana di biblioteconomia e scienze dell'informazione	Associazione Italiana Biblioteche (A I B)
2280-9112	A I B Studi: rivista italiana di biblioteconomia e scienze dell'informazione	Associazione Italiana Biblioteche (A I B)
2038-2723	A I C A R R Journal	Associazione Italiana Condizionamento dell'Aria Riscaldamento e Refrigerazione
0044-9733	A I C Bollettino	Associazione Italiana di Cartografia
1834-0598	A I C C M National Newsletter	Australian Institute for the Conservation of Cultural Material Inc.
1947-4857	A I C E L S Law Review	American Institute for Central European Legal Studies
1947-4865	A I C E L S Law Review	American Institute for Central European Legal Studies
	A I C F Newsletter	America-Israel Cultural Foundation
	A I C H Community Bulletin	American Indian Community House
1684-1476	A I C M A R Bulletin	African Institute for Contemporary Mission and Research (A I C M A R)
1060-3247	A I C News	American Institute for Conservation of Historic and Artistic Works
1446-5256	A I C Newsletter	Australian Institute of Criminology
1446-5264	A I C Newsletter	Australian Institute of Criminology
1535-6272	A I C P A Technical Practice Aids	American Institute of Certified Public Accountants
1058-9198	A I C P A Vest-Pocket Accounting and Auditing Reference	American Institute of Certified Public Accountants
	A I C P Membership Directory	Association of Independent Commercial Producers
1836-2060	A I C Reports. Research and Public Policy Series	Australian Institute of Criminology
1836-2079	A I C Reports. Research and Public Policy Series	Australian Institute of Criminology
0569-5473	A I Ch E Equipment Testing Procedures Series	American Institute of Chemical Engineers
0001-1541	A I Ch E Journal	John Wiley & Sons, Inc.
1547-5905	A I Ch E Journal	John Wiley & Sons, Inc.
0921-7126	A I Communications: the European journal on artificial intelligence	I O S Press
1875-8452	A I Communications: the European journal on artificial intelligence	I O S Press
0177-1566	A I D - Auslaender in Deutschland: Informationsdienst zu aktuellen Fragen der Auslaenderarbeit	Isoplan Institut
1865-0082	A I D A	De Gruyter Saur
	A I D A	De Gruyter Saur
1121-0095	A I D A Informazioni: rivista di scienze dell'informazione	Associazione Italiana per la Documentazione Avanzata
1594-2201	A I D A Informazioni: rivista di scienze dell'informazione	Associazione Italiana per la Documentazione Avanzata
0718-378X	A I D I S. Revista de Ingenieria y Ciencias Ambientales	Universidad Nacional Autonoma de Mexico
1988-740X	A I D R O M. Actas	Asociacion Iberoamericana de Derecho Romano
	A I E S Beitraege zur Europa- und Sicherheitspolitik	Nomos Verlagsgesellschaft mbH und Co. KG
	A I E S Fokus	Austria Institut fuer Europa- und Sicherheitspolitik
2222-9841	A I E S Studien	Austria Institut fuer Europa- und Sicherheitspolitik
	A I E-The Imaging Executive Newsletter	Photo Marketing Association International
0888-3785	A I Expert	Miller Freeman, Inc.
	A I F Newsletter	Animal Industry Foundation
	A I F Revista	Association of Professional Financial and Investment Consultants
	A i F v Ukraine	Ukrains'ka Media Corp.
1727-2084	A i F. Superzvezdy	Argumenty i Fakty
	A I G Bulletin	Australian Industry Group
1542-8117	A I H A Journal: journal for the science of occupational and environmental health and safety	American Industrial Hygiene Association
	A I H P Notes	American Institute of the History of Pharmacy
1838-5842	A I I A Policy Commentary	Australian Institute of International Affairs
1838-5850	A I I A Policy Commentary	Australian Institute of International Affairs
0304-6214	A I I S Quarterly Newsletter	American Institute of Indian Studies
1875-1113	A I L A Applied Linguistics Series	John Benjamins Publishing Co.
	A I L A Business Immigration News	American Immigration Lawyers Association
1446-8832	A I L A News	Association Internationale de Linguistique Appliquee
1446-8840	A I L A News	Association Internationale de Linguistique Appliquee
1461-0213	A I L A Review	John Benjamins Publishing Co.
1570-5595	A I L A Review	John Benjamins Publishing Co.
	A I L T O Insider	American Institute for Law Training within the Office
1059-7425	A I M	Nielsen Marketing Research
1085-5211	A I M	A I M Publishing Association
1062-5968	A I M	Association of Indian Muslims of America
	A I M - R News	Association of Industry Manufacturers Representatives
	A I M A News	All Indian Management Association
1750-4147	A I M Bulletin	Tinderhouse Ltd.
	A I M C Newsletter	Association of Internal Management Consultants (A I M C)
0884-6316	A I M International	Africa Inland Mission International
1974-9635	A I M Magazine	Associazione Italiana Macromolecole (A I M)
1974-9643	A I M Magazine	Associazione Italiana Macromolecole (A I M)
	A I M News	Automotive Industry Matters Pty. Ltd.
0738-7792	A I M Report	Accuracy in Media, Inc.
0969-7802	A I M Reports	Mozambique News Agency
1939-7011	A I M S International Journal of Management	A I M S International
1357-9657	A I M S Journal	Association for Improvements in Maternity Services
	A I M S News	A I M S Education Foundation
1033-6974	A I M S Report	Australian Institute of Marine Science
1910-3166	A I M S Special Equalization Series	Atlantic Institute for Market Studies
1779-4811	A I M. Bulletin	Alliance Inter-Monasteres
2039-8816	A I M. Quaderni	Edizioni Nuova Cultura
	A I M: a newsletter on retirement and travel in Mexico	AIM, S.A.
1079-459X	A I M: Liturgy Resources	World Library Publications, Inc.
0738-4602	A I Magazine	A A A I Press
0939-2661	A I N S - Anaesthesiologie, Intensivmedizin, Notfallmedizin, Schmerztherapie	Georg Thieme Verlag
1439-1074	A I N S - Anaesthesiologie, Intensivmedizin, Notfallmedizin, Schmerztherapie	Georg Thieme Verlag
1439-4472	A I N S Supplement	Georg Thieme Verlag
0001-1630	A I O E Labour News	All India Organisation of Employers
1048-2482	A I O Journal	American Institute of Organbuilders
2239-2874	A I O M Bollettino	Associazione di Ingegneria Offshore e Marittima (A I O M)
2239-2882	A I O M Bollettino	Associazione di Ingegneria Offshore e Marittima (A I O M)
2158-3226	A I P Advances	American Institute of Physics
	A I P Ambiente	Associacao Industrial Portuense
	A I P Canada	NAV Canada
1551-7616	A I P Conference Proceedings (Online)	American Institute of Physics
0094-243X	A I P Conference Proceedings (Print)	American Institute of Physics
1935-0465	A I P Conference Proceedings (Print)	American Institute of Physics
1931-3012	A I P Conference Proceedings. Accelerators & Beams	American Institute of Physics
1931-3020	A I P Conference Proceedings. Astronomy & Astrophysics	American Institute of Physics
1931-3039	A I P Conference Proceedings. Atomic, Molecular & Statistical Physics	American Institute of Physics
1931-3047	A I P Conference Proceedings. Materials Physics & Applications	American Institute of Physics
1931-3055	A I P Conference Proceedings. Mathematical & Statistical Physics	American Institute of Physics
1931-3063	A I P Conference Proceedings. Nuclear & High Energy Physics	American Institute of Physics
1931-3071	A I P Conference Proceedings. Plasma Physics	American Institute of Physics
0870-287X	A I P Informacao	Associacao Industrial Portuguesa
	A I P L A Bulletin	American Intellectual Property Law Association
[truncated: 317,077+ more rows]
