# Supplementary material for: Usage Trends of Open Access and Local Journals: A Korean Case Study
Source: PLoS One. 2016 May 19;11(5):e0155843. doi: 10.1371/journal.pone.0155843 (PMC4873189; doi:10.1371/journal.pone.0155843)
Supplement: S6 Table — (XLSX) [file pone.0155843.s007.xlsx]

## Sheet: J_Entrez2
JournalTitle	MedAbbr	ISSN (Print)	ISSN (Online)	IsoAbbr
AARN news letter	AARN News Lett	0001-0197		AARN News Lett
AAUP bulletin : quarterly publication of the American Association of University Professors	AAUP Bull	0001-026X		AAUP Bull
AB bookman's weekly : for the specialist book world	AB Bookm Wkly	0001-0340		AB Bookm Wkly
Communications of the ACM	Commun ACM	0001-0782		Commun ACM
ADA forecast	ADA Forecast	0001-0847		ADA Forecast
ADA news	ADA News	0001-0855		ADA News
Revista ADM (Asociacion Dental Mexicana : 1988)	Rev ADM	0001-0944		Rev ADM
AIAA student journal. American Institute of Aeronautics and Astronautics	AIAA Stud J	0001-1460		AIAA Stud J
AIA journal. American Institute of Architects	AIA J	0001-1479		AIA J
AIChE journal. American Institute of Chemical Engineers	AIChE J	0001-1541	1547-5905	AIChE J
Seminario De Ensenanza De La Odontopediatria	Semin Ensen Odontopediatr	0001-1703		Semin Ensen Odontopediatr
American medical news	Am Med News	0001-1843		Am Med News
AMDI bollettino	AMDI Boll	0001-1908		AMDI Boll
ANU historical journal	ANU Hist J	0001-2068		ANU Hist J
AORN journal	AORN J	0001-2092	1878-0369	AORN J
Transactions of the ASAE. American Society of Agricultural Engineers	Trans ASAE	0001-2351		Trans ASAE
ASHA	ASHA	0001-2475		ASHA
Aslib proceedings	Aslib Proc	0001-253X		Aslib Proc
Tissue antigens	Tissue Antigens	0001-2815	1399-0039	Tissue Antigens
The A-V	AV (Phila)	0001-2831		AV (Phila)
AV communication review	Av Commun Rev	0001-2890		Av Commun Rev
AVS news / Association for Voluntary Sterilization	AVS News	0001-2904		AVS News
A.W.R. Bulletin. Association for the Study of the World Refugee Problem	AWR Bull	0001-2947		AWR Bull
Seminars in nuclear medicine	Semin Nucl Med	0001-2998	1558-4623	Semin Nucl Med
Aberdeen University review	Aberdeen Univ Rev	0001-320X		Aberdeen Univ Rev
Anais da Academia Brasileira de Ciencias	An Acad Bras Cienc	0001-3765	1678-2690	An. Acad. Bras. Cienc.
Boletim (Academia Nacional de Medicina (Brazil))	Bol Acad Nac Med	0001-3838		Bol Acad Nac Med
Academia Peruana de Cirugia	Acad Peru Cir	0001-3854		Acad Peru Cir
Chirurgie; memoires de l'Academie de chirurgie	Chirurgie	0001-4001		Chirurgie
Comptes rendus hebdomadaires des seances de l'Academie des sciences	C R Hebd Seances Acad Sci	0001-4036		C. R. Hebd. Seances Acad. Sci.
Bulletin de l'Academie nationale de medecine	Bull Acad Natl Med	0001-4079		Bull. Acad. Natl. Med.
Bulletin. Academie royale des sciences, des lettres et des beaux-arts de Belgique. Classe des sciences	Bull Cl Sci Acad R Belg	0001-4141		Bull Cl Sci Acad R Belg
Bulletin de l'Academie royale de medecine de Belgique	Bull Acad R Med Belg	0001-4168		Bull Acad R Med Belg
Bulletin des seances- Academie royale des sciences d'outre-mer	Bull Seances Acad R Sci Outre Mer	0001-4176		Bull Seances Acad R Sci Outre Mer
Bulletin de l'Academie veterinaire de France	Bull Acad Vet Fr	0001-4192		Bull Acad Vet Fr
The Academy bookman	Acad Bookman	0001-4249		Acad Bookman
Journal - Academy of General Dentistry	J Acad Gen Dent	0001-4265		J Acad Gen Dent
Academy of Management journal. Academy of Management	Acad Manage J	0001-4273	1948-0989	Acad Manage J
Bulletin - Academy of Medicine of Cleveland	Bull Acad Med Clevel	0001-4281		Bull Acad Med Clevel
Bulletin - Academy of Medicine of New Jersey	Bull Acad Med N J	0001-429X		Bull Acad Med N J
Bulletin of the Academy of Medicine, Toronto	Bull Acad Med Tor	0001-4311		Bull Acad Med Tor
Pharmacology and therapeutics in dentistry	Pharmacol Ther Dent	0001-4389		Pharmacol Ther Dent
Atti della Accademia medica lombarda	Atti Accad Med Lomb	0001-4427		Atti Accad Med Lomb
Accademie e biblioteche d'Italia	Accad Bibl Ital	0001-4451		Accad Bibl Ital
Accident; analysis and prevention	Accid Anal Prev	0001-4575	1879-2057	Accid Anal Prev
Accounts of chemical research	Acc Chem Res	0001-4842	1520-4898	Acc. Chem. Res.
The Journal of the Acoustical Society of America	J Acoust Soc Am	0001-4966	1520-8524	J. Acoust. Soc. Am.
Acta allergologica	Acta Allergol	0001-5148		Acta Allergol
Acta anaesthesiologica	Acta Anaesthesiol	0001-5156		Acta Anaesthesiol
Acta anaesthesiologica Belgica	Acta Anaesthesiol Belg	0001-5164		Acta Anaesthesiol Belg
Acta anaesthesiologica Scandinavica	Acta Anaesthesiol Scand	0001-5172	1399-6576	Acta Anaesthesiol Scand
Acta anatomica	Acta Anat (Basel)	0001-5180		Acta Anat (Basel)
Acta biochimica Polonica	Acta Biochim Pol	0001-527X	1734-154X	Acta Biochim. Pol.
Acta biologica Academiae Scientiarum Hungaricae	Acta Biol Acad Sci Hung	0001-5288		Acta Biol Acad Sci Hung
Acta biologica Cracoviensia. Series: Botanica		0001-5296		Acta Biol Crac Ser Bot
Acta biologica et medica Germanica	Acta Biol Med Ger	0001-5318		Acta Biol. Med. Ger.
Shi yan sheng wu xue bao	Shi Yan Sheng Wu Xue Bao	0001-5334		Shi Yan Sheng Wu Xue Bao
Acta biotheoretica	Acta Biotheor	0001-5342	1572-8358	Acta Biotheor.
Acta cardiologica	Acta Cardiol	0001-5385	1784-973X	Acta Cardiol
Acta chemica Scandinavica	Acta Chem Scand	0001-5393		Acta Chem Scand
Acta chirurgiae orthopaedicae et traumatologiae Cechoslovaca	Acta Chir Orthop Traumatol Cech	0001-5415		Acta Chir Orthop Traumatol Cech
Acta chirurgiae plasticae	Acta Chir Plast	0001-5423	1805-4404	Acta Chir Plast
Acta chirurgica Academiae Scientiarum Hungaricae	Acta Chir Acad Sci Hung	0001-5431		Acta Chir Acad Sci Hung
Acta chirurgica Austriaca	Acta Chir Austriaca	0001-544X	1563-2563	Acta Chir Austriaca
Acta chirurgica Belgica	Acta Chir Belg	0001-5458		Acta Chir. Belg.
Acta chirurgica Italica	Acta Chir Ital	0001-5466		Acta Chir Ital
Acta chirurgica Scandinavica	Acta Chir Scand	0001-5482		Acta Chir Scand
Acta cientifica venezolana	Acta Cient Venez	0001-5504		Acta Cient. Venez.
Acta cytologica	Acta Cytol	0001-5547	1938-2650	Acta Cytol.
Acta dermato-venereologica	Acta Derm Venereol	0001-5555	1651-2057	Acta Derm. Venereol.
Acta diabetologica latina	Acta Diabetol Lat	0001-5563		Acta Diabetol Lat
Acta endocrinologica	Acta Endocrinol (Copenh)	0001-5598		Acta Endocrinol.
Acta gastro-enterologica Belgica	Acta Gastroenterol Belg	0001-5644		Acta Gastroenterol. Belg.
Human heredity	Hum Hered	0001-5652	1423-0062	Hum. Hered.
Acta geneticae medicae et gemellologiae	Acta Genet Med Gemellol (Roma)	0001-5660		Acta Genet Med Gemellol (Roma)
Acta geographica	Acta Geogr	0001-5687		Acta Geogr
Acta gerontologica	Acta Gerontol (Milano)	0001-5741		Acta Gerontol (Milano)
Acta ginecologica	Acta Ginecol (Madr)	0001-5776		Acta Ginecol (Madr)
Acta gynaecologica et obstetrica Hispano-Lusitana	Acta Gynaecol Obstet Hisp Lusit	0001-5784		Acta Gynaecol Obstet Hisp Lusit
Acta haematologica	Acta Haematol	0001-5792	1421-9662	Acta Haematol.
Nihon Ketsueki Gakkai zasshi : journal of Japan Haematological Society	Nihon Ketsueki Gakkai Zasshi	0001-5806		Nippon Ketsueki Gakkai Zasshi
Acta haematologica Polonica	Acta Haematol Pol	0001-5814		Acta Haematol Pol
Acta hepato-splenologica	Acta Hepatosplenol	0001-5822		Acta Hepatosplenol
Acta historica Leopoldina	Acta Hist Leopoldina	0001-5857		Acta Hist Leopoldina
Acta historica medicinae, pharmaciae, veterinae	Acta Hist Med Pharm Vet (Beograd)	0001-5865		Acta Hist Med Pharm Vet (Beograd)
Acta iberica radiologica-cancerologica	Acta Iber Radiol Cancerol	0001-589X		Acta Iber Radiol Cancerol
Acta isotopica	Acta Isot (Padova)	0001-5911		Acta Isot (Padova)
Acta leprologica	Acta Leprol	0001-5938		Acta Leprol
Acta mechanica	Acta Mech	0001-5970	1619-6937	Acta Mech
Acta medica Academiae Scientiarum Hungaricae	Acta Med Acad Sci Hung	0001-5989		Acta Med Acad Sci Hung
Acta medica auxologica	Acta Med Auxol (Milano)	0001-6004		Acta Med Auxol (Milano)
Acta medica costarricense	Acta Med Costarric	0001-6012		Acta Med Costarric
Acta medica de Tenerife	Acta Med Tenerife	0001-6020		Acta Med Tenerife
Acta medica Italica di medicina tropicale e subtropicale e di gastroenterologia	Acta Med Ital Med Trop Subtrop Gastroenterol	0001-6039		Acta Med Ital Med Trop Subtrop Gastroenterol
Acta medica Nagasakiensia	Acta Med Nagasaki	0001-6055		Acta Med Nagasaki
Acta medica Patavina	Acta Med Patav	0001-6063		Acta Med Patav
Acta medica Philippina	Acta Med Philipp	0001-6071		Acta Med Philipp
Acta medica Polona	Acta Med Pol	0001-608X		Acta Med Pol
Acta medica romana; annali della Facolta di medicina e chirurgia, Universita cattolica del Sacro Cuore	Acta Med Rom	0001-6098		Acta Med Rom
Acta medica Scandinavica	Acta Med Scand	0001-6101		Acta Med Scand
Acta medica veterinaria	Acta Med Vet (Napoli)	0001-6136		Acta Med Vet (Napoli)
Acta medica Vietnamica	Acta Med Vietnam	0001-6144		Acta Med Vietnam
Acta medicinae Okayama	Acta Med Okayama	0001-6152		Acta Med Okayama
Acta microbiologica Academiae Scientiarum Hungaricae	Acta Microbiol Acad Sci Hung	0001-6187		Acta Microbiol Acad Sci Hung
Wei sheng wu xue bao = Acta microbiologica Sinica	Wei Sheng Wu Xue Bao	0001-6209		Wei Sheng Wu Xue Bao
Acta morphologica Academiae Scientiarum Hungaricae	Acta Morphol Acad Sci Hung	0001-6217		Acta Morphol Acad Sci Hung
Acta morphologica Neerlando-Scandinavica	Acta Morphol Neerl Scand	0001-6225		Acta Morphol Neerl Scand
Acta mycologica	Acta Mycol	0001-625X		Acta Mycol
Acta neurochirurgica	Acta Neurochir (Wien)	0001-6268	0942-0940	Acta Neurochir (Wien)
Acta neurologica	Acta Neurol (Napoli)	0001-6276		Acta Neurol (Napoli)
Acta neurologica et psychiatrica Belgica	Acta Neurol Psychiatr Belg	0001-6284		Acta Neurol Psychiatr Belg
Acta neurologica latinoamericana	Acta Neurol Latinoam	0001-6306		Acta Neurol Latinoam
Acta neurologica Scandinavica	Acta Neurol Scand	0001-6314	1600-0404	Acta Neurol. Scand.
Acta neuropathologica	Acta Neuropathol	0001-6322	1432-0533	Acta Neuropathol.
Acta obstetrica et gynaecologica Japonica	Acta Obstet Gynaecol Jpn	0001-6330		Acta Obstet Gynaecol Jpn
Acta obstetricia et gynecologica Scandinavica	Acta Obstet Gynecol Scand	0001-6349	1600-0412	Acta Obstet Gynecol Scand
Acta odontologica Scandinavica	Acta Odontol Scand	0001-6357	1502-3850	Acta Odontol. Scand.
Acta odontologica venezolana	Acta Odontol Venez	0001-6365		Acta Odontol Venez
Acta oncologica	Acta Oncol (Madr)	0001-6381		Acta Oncol (Madr)
Acta ophthalmologica	Acta Ophthalmol (Copenh)	0001-639X		Acta Ophthalmol (Copenh)
Acta orthopaedica Belgica	Acta Orthop Belg	0001-6462		Acta Orthop Belg
Acta orthopaedica Scandinavica	Acta Orthop Scand	0001-6470		Acta Orthop Scand
Acta oto-laryngologica	Acta Otolaryngol	0001-6489	1651-2251	Acta Otolaryngol.
Acta oto-rhino-laryngologica Belgica	Acta Otorhinolaryngol Belg	0001-6497		Acta Otorhinolaryngol Belg
Acta oto-rino-laringologica ibero-americana	Acta Otorinolaryngol Iber Am	0001-6500		Acta Otorinolaryngol Iber Am
Acta otorrinolaringologica espanola	Acta Otorrinolaringol Esp	0001-6519	1988-3013	Acta Otorrinolaringol Esp
Acta paediatrica Academiae Scientiarum Hungaricae	Acta Paediatr Acad Sci Hung	0001-6527		Acta Paediatr Acad Sci Hung
Acta paediatrica Belgica	Acta Paediatr Belg	0001-6535		Acta Paediatr Belg
Nihon Shonika Gakkai zasshi. Acta paediatrica Japonica	Nihon Shonika Gakkai Zasshi	0001-6543		Nihon Shonika Gakkai Zasshi
Acta paediatrica Scandinavica	Acta Paediatr Scand	0001-656X		Acta Paediatr Scand
Zhonghua Minguo xiao er ke yi xue hui za zhi [Journal]. Zhonghua Minguo xiao er ke yi xue hui	Zhonghua Min Guo Xiao Er Ke Yi Xue Hui Za Zhi	0001-6578		Zhonghua Min Guo Xiao Er Ke Yi Xue Hui Za Zhi
Acta paedopsychiatrica	Acta Paedopsychiatr	0001-6586		Acta Paedopsychiatr
Gu sheng wu xue bao = Acta palaeontologica Sinica		0001-6616		Gu Sheng Wu Xue Bao
Acta pathologica japonica	Acta Pathol Jpn	0001-6632		Acta Pathol. Jpn.
Acta pediatrica espanola	Acta Pediatr Esp	0001-6640		Acta Pediatr Esp
Acta pharmaceutica Hungarica	Acta Pharm Hung	0001-6659		Acta Pharm Hung
Acta pharmaceutica Jugoslavica	Acta Pharm Jugosl	0001-6667		Acta Pharm Jugosl
Acta pharmaceutica Suecica	Acta Pharm Suec	0001-6675		Acta Pharm. Suec.
Acta pharmacologica et toxicologica	Acta Pharmacol Toxicol (Copenh)	0001-6683		Acta Pharmacol Toxicol (Copenh)
Acta physiologica et pharmacologica Neerlandica	Acta Physiol Pharmacol Neerl	0001-6748		Acta Physiol Pharmacol Neerl
Acta physiologica Academiae Scientiarum Hungaricae	Acta Physiol Acad Sci Hung	0001-6756		Acta Physiol Acad Sci Hung
Acta physiologica latino americana	Acta Physiol Lat Am	0001-6764		Acta Physiol Lat Am
Acta physiologica Scandinavica	Acta Physiol Scand	0001-6772	1365-201X	Acta Physiol. Scand.
Acta Poloniae historica	Acta Pol Hist	0001-6829		Acta Pol Hist
Acta poloniae pharmaceutica	Acta Pol Pharm	0001-6837		Acta Pol Pharm
Acta psiquiatrica y psicologica de America latina	Acta Psiquiatr Psicol Am Lat	0001-6896		Acta Psiquiatr Psicol Am Lat
Acta psychiatrica Scandinavica	Acta Psychiatr Scand	0001-690X	1600-0447	Acta Psychiatr Scand
Acta psychologica	Acta Psychol (Amst)	0001-6918	1873-6297	Acta Psychol (Amst)
Acta radiologica	Acta radiol	0001-6926		Acta radiol
Acta rheumatologica Scandinavica	Acta Rheumatol Scand	0001-6934		Acta Rheumatol Scand
Acta Scholae Medicinalis Universitatis in Kioto	Acta Sch Med Univ Kioto	0001-6950		Acta Sch Med Univ Kioto
Acta Societatis Botanicorum Poloniae. Polskie Towarzystwo Botaniczne		0001-6977		Acta Soc. Bot. Pol. Pol. Tow. Bot.
Acta Societatis Medicorum Upsaliensis	Acta Soc Med Ups	0001-6985		Acta Soc Med Ups
Acta sociologica	Acta Sociol	0001-6993		Acta Sociol
Acta stomatologica Belgica	Acta Stomatol Belg	0001-7000		Acta Stomatol Belg
Acta stomatologica Croatica	Acta Stomatol Croat	0001-7019		Acta Stomatol Croat
Acta theriologica	Acta Theriol (Warsz)	0001-7051	2190-3743	Acta Theriol.
Acta tropica	Acta Trop	0001-706X	1873-6254	Acta Trop.
Acta tuberculosea et pneumologica Belgica	Acta Tuberc Pneumol Belg	0001-7078		Acta Tuberc Pneumol Belg
Drug therapy	Drug Ther (NY)	0001-7094		Drug Ther (NY)
Acta Universitatis Carolinae. Medica	Acta Univ Carol Med (Praha)	0001-7116		Acta Univ Carol Med (Praha)
Acta urologica Belgica	Acta Urol Belg	0001-7183		Acta Urol Belg
Acta veterinaria Academiae Scientiarum Hungaricae	Acta Vet Acad Sci Hung	0001-7205		Acta Vet Acad Sci Hung
Acta veterinaria	Acta Vet Brno	0001-7213		Acta Vet. Brno
Acta virologica	Acta Virol	0001-723X	1336-2305	Acta Virol.
Acta zoologica (Stockholm, Sweden)	Acta Zool	0001-7272	1463-6395	Acta Zool
Acta zoologica et pathologica Antverpiensia	Acta Zool Pathol Antverp	0001-7280		Acta Zool Pathol Antverp
Dong wu xue bao. [Acta zoologica Sinica]	Dong Wu Xue Bao	0001-7302		Dong Wu Xue Bao
Actas dermo-sifiliograficas	Actas Dermosifiliogr	0001-7310	1578-2190	Actas Dermosifiliogr
Actas luso-espanolas de neurologia y psiquiatria	Actas Luso Esp Neurol Psiquiatr	0001-7329		Actas Luso Esp Neurol Psiquiatr
Activitas nervosa superior	Act Nerv Super (Praha)	0001-7604		Act Nerv Super (Praha)
Actualidad pediatrica; revista de bibliografia internacional	Actual Pediatr (Granada)	0001-7671		Actual Pediatr (Granada)
L'Actualite economique	Actual Econ	0001-771X		Actual Econ
Actualites odonto-stomatologiques	Actual Odontostomatol (Paris)	0001-7817		Actual Odontostomatol (Paris)
Aktuelle Urologie	Aktuelle Urol	0001-7868	1438-8820	Aktuelle Urol
Behavior genetics	Behav Genet	0001-8244	1573-3297	Behav. Genet.
Adler	Adler	0001-8260		Adler
The quarterly journal of administration / Institute of Administration, University of Ife	Q J Adm	0001-8333		Q J Adm
Administrative law review	Adm Law Rev	0001-8368		Adm Law Rev
Administrative management	Adm Manage	0001-8376		Adm Manage
Administrative science quarterly	Adm Sci Q	0001-8392		Adm Sci Q
Adolescence	Adolescence	0001-8449		Adolescence
Adult education	Adult Educ	0001-8481		Adult Educ
Advancement of science	Adv Sci	0001-866X		Adv Sci
Advances in applied probability	Adv Appl Probab	0001-8678	1475-6064	Adv Appl Probab
Advances in colloid and interface science	Adv Colloid Interface Sci	0001-8686	1873-3727	Adv Colloid Interface Sci
Advances in mathematics	Adv Math (N Y)	0001-8708	1090-2082	Adv Math (N Y)
Shinkei kenkyu no shimpo. Advances in neurological sciences	Shinkei Kenkyu No Shimpo	0001-8724		Shinkei Kenkyu No Shimpo
Advances in physics	Adv Phys	0001-8732	1460-6976	Adv Phys
Journal of vocational behavior	J Vocat Behav	0001-8791		J Vocat Behav
Advertising age	Advert Age	0001-8899		Advert Age
Aegyptus	Aegyptus	0001-9046		Aegyptus
L'Aeronautique et l'astronautique : organe commun de l'Association francaise des ingenieurs et techniciens de l'aeronautique de l'espace (A.F.I.T.A.E.) et de la Societe francaise d'astronautique (S.F.A.)	Aeronaut Astronaut	0001-9275		Aeronaut Astronaut
Aerospace historian	Aerosp Hist	0001-9364		Aerosp Hist
Aerospace medicine	Aerosp Med	0001-9402		Aerosp Med
Aerzteblatt Rheinland-Pfalz	Arztebl Rheinl Pfalz	0001-9488		Arztebl Rheinl Pfalz
Arztliche Forschung	Arztl Forsch	0001-9496		Arztl Forsch
Die Arztliche Fortbildung	Arztl Fortbild	0001-950X		Arztl Fortbild
Arztliche Jugendkunde	Arztl Jugendkd	0001-9518		Arztl Jugendkd
Aerztliche Praxis	Arztl Prax	0001-9534		Arztl Prax
Aevum	Aevum	0001-9593		Aevum
Afghanistan	Afghanistan	0001-9682		Afghanistan
Africa : journal of the International Institute of African Languages and Cultures	Africa (Lond)	0001-9720		Africa (Lond)
Africa : notiziario dell'Associazione fra le imprese italiane in Africa	Africa	0001-9747		Africa
Africa quarterly	Afr Q	0001-9828		Afr Q
Africa report	Afr Rep	0001-9836		Afr Rep
Africa today	Afr Today	0001-9887		Afr Today
African affairs	Afr Aff (Lond)	0001-9909		Afr Aff (Lond)
African historical studies	Afr Hist Stud	0001-9992		Afr Hist Stud
The African journal of medical sciences	Afr J Med Sci	0002-0028		Afr J Med Sci
African notes : bulletin of the Institute of African Studies, University of Ibadan	Afr Notes	0002-0087		Afr Notes
African review (Dar es Salaam, Tanzania)	Afr Rev	0002-0117		Afr Rev
African social research	Afr Soc Res	0002-0168		Afr Soc Res
African studies	Afr Stud	0002-0184		Afr Stud
African studies review	Afr Stud Rev	0002-0206		Afr Stud Rev
Africana Marburgensia	Afr Marburgen	0002-0311		Afr Marburgen
Africana notes and news. Africana aantekeninge en nuus	Afr Notes News	0002-032X		Afr Notes News
Afrika und Ubersee	Afr Uebersee	0002-0427		Afr Uebersee
The Journal of nursing administration	J Nurs Adm	0002-0443	1539-0721	J Nurs Adm
Afrique contemporaine	Afr Contemp	0002-0478		Afr Contemp
L'Afrique litteraire et artistique	Afr Litt Artist	0002-0508		Afr Litt Artist
Afrique medicale	Afr Med	0002-0516		Afr Med
Age and ageing	Age Ageing	0002-0729	1468-2834	Age Ageing
Aggiornamenti clinicoterapeutici	Aggiorn Clinico Ter	0002-0907		Aggiorn Clinico Ter
Aggiornamenti in ostetricia e ginecologia	Aggiorn Ostet Ginecol	0002-0931		Aggiorn Ostet Ginecol
Aggiornamento pediatrico	Aggiorn Pediatr	0002-0958		Aggiorn Pediatr
Aging	Aging	0002-0966		Aging
Krankenpflege (Frankfurt am Main, Germany)	Krankenpflege (Frankf)	0002-1008		Krankenpflege (Frankf)
Agrartorteneti szemle = Historia rerum rusticarum	Agratort Szle	0002-1105		Agratort Szle
Agressologie: revue internationale de physio-biologie et de pharmacologie appliquees aux effets de l'agression	Agressologie	0002-1148		Agressologie
Agricultural and biological chemistry	Agric Biol Chem	0002-1369	1881-1280	Agric. Biol. Chem.
Agricultural economics research	Agric Econ Res	0002-1423		Agric Econ Res
Agricultural history	Agric Hist	0002-1482		Agric Hist
The Agricultural history review	Agric Hist Rev	0002-1490		Agric Hist Rev
Agronomy journal	Agron J	0002-1962		Agron J
Ain Shams medical journal	Ain Shams Med J	0002-2144		Ain Shams Med J
Building systems design	Build Syst Des	0002-2284		Build Syst Des
Air line pilot	Air Line Pilot	0002-242X		Air Line Pilot
Journal of the Air Pollution Control Association	J Air Pollut Control Assoc	0002-2470		J Air Pollut Control Assoc
Air University review (United States edition)	Air Univ Rev (US ed)	0002-2594		Air Univ Rev (US ed)
Vestnik Akademii meditsinskikh nauk SSSR	Vestn Akad Med Nauk SSSR	0002-3027		Vestn. Akad. Med. Nauk SSSR
Doklady Akademii nauk SSSR	Dokl Akad Nauk SSSR	0002-3264		Dokl. Akad. Nauk SSSR
Izvestiia Akademii nauk SSSR. Seriia biologicheskaia	Izv Akad Nauk SSSR Biol	0002-3329		Izv Akad Nauk SSSR Biol
Vestnik Akademii nauk SSSR	Vestn Akad Nauk SSSR	0002-3442		Vestn Akad Nauk SSSR
Bulletin of the Akron Dental Society	Bull Akron Dent Soc	0002-3701		Bull Akron Dent Soc
Akron law review	Akron Law Rev	0002-371X		Akron Law Rev
Akusherstvo i ginekologiia	Akush Ginekol (Mosk)	0002-3906		Akush Ginekol (Mosk)
Akwesasne notes	Akwesasne Notes	0002-3949		Akwesasne Notes
The Journal of the Alabama Academy of Science	J Ala Acad Sci	0002-4112		J Ala Acad Sci
Journal - Alabama Dental Association	J Ala Dent Assoc	0002-4198		J Ala Dent Assoc
The Alabama historical quarterly	Ala Hist Q	0002-4236		Ala Hist Q
The Alabama journal of medical sciences	Ala J Med Sci	0002-4252		Ala J Med Sci
Alabama law review	Ala Law Rev	0002-4279		Ala Law Rev
The Alabama nurse	Ala Nurse	0002-4317		Ala Nurse
Alabama social welfare	Ala Soc Welf	0002-4368		Ala Soc Welf
Alaska journal (Juneau, Alaska : 1971)	Alaska J	0002-4503		Alaska J
Alaska medicine	Alaska Med	0002-4538		Alaska Med
The Alaska nurse	Alaska Nurse	0002-4546		Alaska Nurse
Albany law review	Albany Law Rev	0002-4678		Albany Law Rev
The Journal of the Albert Einstein Medical Center, Philadelphia	J Albert Einstein Med Cent (Phila)	0002-4708		J Albert Einstein Med Cent (Phila)
Alberta law review	Alta Law Rev	0002-4821		Alta Law Rev
Alberta medical bulletin	Alberta Med Bull	0002-4848		Alberta Med Bull
Aldrichimica acta	Aldrichimica Acta	0002-5100		Aldrichimica Acta
Revista alergia Mexico (Tecamachalco, Puebla, Mexico : 1993)	Rev Alerg Mex	0002-5151		Rev Alerg Mex
The all England law reports	All Engl Law Rep	0002-5569		All Engl Law Rep
Allemagne d'aujourd'hui : revue francaise d'information sur les deux l'Allemagnes	Allem Aujourdhui	0002-5712		Allem Aujourdhui
Allgemeine homoopathische Zeitung fur wissenschaftliche und praktische Homoopathie	Allg Homoopath Ztg	0002-5887		Allg Homoopath Ztg
Allgemeines statistisches Archiv	All Stat Arch	0002-6018		All Stat Arch
The Alpha omegan	Alpha Omegan	0002-6417		Alpha Omegan
Das Altertum	Altertum	0002-6646		Altertum
Der Altsprachliche Unterricht	Altsprachi Unterr	0002-6670		Altsprachi Unterr
The Alumnae magazine	Alumnae Mag	0002-6700		Alumnae Mag
Ambix	Ambix	0002-6980		Ambix
America	America (NY)	0002-7049		America (NY)
America latina	Am Lat	0002-709X		Am Lat
The Woman physician	Woman Physician	0002-7103		Woman Physician
Bulletin - American Academy of Arts and Sciences. American Academy of Arts and Sciences	Bull Am Acad Arts Sci	0002-712X		Bull Am Acad Arts Sci
Journal of the American Academy of Child Psychiatry	J Am Acad Child Psychiatry	0002-7138		J Am Acad Child Psychiatry
The Journal of the American Academy of Gold Foil Operators	J Am Acad Gold Foil Oper	0002-7146		J Am Acad Gold Foil Oper
Transactions - American Academy of Ophthalmology and Otolaryngology. American Academy of Ophthalmology and Otolaryngology	Trans Am Acad Ophthalmol Otolaryngol	0002-7154		Trans Am Acad Ophthalmol Otolaryngol
The Annals of the American Academy of Political and Social Science	Ann Am Acad Pol Soc Sci	0002-7162		Ann Am Acad Pol Soc Sci
Journal of the American Academy of Religion. American Academy of Religion	J Am Acad Relig	0002-7189		J Am Acad Relig
American annals of the deaf	Am Ann Deaf	0002-726X		Am Ann Deaf
American anthropologist	Am Anthropol	0002-7294		Am Anthropol
American antiquity	Am Antiq	0002-7316		Am Antiq
American archives of rehabilitation therapy	Am Arch Rehabil Ther	0002-7324		Am Arch Rehabil Ther
The American art journal	Am Art J	0002-7359		Am Art J
The Journal of the American Association of Nurse Anesthetists	J Am Assoc Nurse Anesth	0002-7448		J Am Assoc Nurse Anesth
American Bar Association journal. American Bar Association	Am Bar Assoc J	0002-7596		Am Bar Assoc J
The American behavioral scientist	Am Behav Sci	0002-7642		Am Behav Sci
The American Benedictine review	Am Benedictine Rev	0002-7650		Am Benedictine Rev
The American biology teacher	Am Biol Teach	0002-7685		Am Biol Teach
Journal of the American Ceramic Society. American Ceramic Society	J Am Ceram Soc	0002-7820	1551-2916	J Am Ceram Soc
Journal of the American Chemical Society	J Am Chem Soc	0002-7863	1520-5126	J. Am. Chem. Soc.
Journal of the American College Health Association	J Am Coll Health Assoc	0002-7944		J Am Coll Health Assoc
The Journal of the American College of Dentists	J Am Coll Dent	0002-7979		J Am Coll Dent
Bulletin of the American College of Nurse-Midwives	Bull Am Coll Nurse Midwives	0002-8002		Bull Am Coll Nurse Midwives
The Bulletin of the American College of Physicians	Bull Am Coll Physicians	0002-8010		Bull Am Coll Physicians
Bulletin of the American College of Surgeons	Bull Am Coll Surg	0002-8045		Bull Am Coll Surg
American corrective therapy journal	Am Correct Ther J	0002-8088		Am Correct Ther J
Journal of the American Dental Association (1939)	J Am Dent Assoc	0002-8177	1943-4723	J Am Dent Assoc
The Journal of the American Dental Hygienists' Association	J Am Dent Hyg Assoc	0002-8185		J Am Dent Hyg Assoc
Journal of the American Dietetic Association	J Am Diet Assoc	0002-8223	1878-3570	J Am Diet Assoc
Journal of the American Society for Information Science. American Society for Information Science	J Am Soc Inf Sci	0002-8231		J Am Soc Inf Sci
The American ecclesiastical review	Am Eccles Rev	0002-8274		Am Eccles Rev
The American economic review	Am Econ Rev	0002-8282		Am Econ Rev
American education	Am Educ	0002-8304		Am Educ
American educational research journal	Am Educ Res J	0002-8312		Am Educ Res J
American family physician	Am Fam Physician	0002-838X	1532-0650	Am Fam Physician
American fern journal		0002-8444		Am. Fern J.
Transactions of the American Fisheries Society	Trans Am Fish Soc	0002-8487	1548-8659	Trans. Am. Fish. Soc.
Journal of the American Geriatrics Society	J Am Geriatr Soc	0002-8614	1532-5415	J Am Geriatr Soc
American heart journal	Am Heart J	0002-8703	1097-6744	Am. Heart J.
American heritage	Am Herit	0002-8738		Am Herit
The American historical review	Am Hist Rev	0002-8762	1937-5239	Am Hist Rev
American history illustrated	Am Hist Illus	0002-8770		Am Hist Illus
American Industrial Hygiene Association journal	Am Ind Hyg Assoc J	0002-8894		Am Ind Hyg Assoc J
Journal of the American Institute of Homeopathy	J Am Inst Homeopath	0002-8967		J Am Inst Homeopath
Journal of the American Institute of Planners	J Am Inst Plann	0002-8991		J Am Inst Plann
American Jewish archives	Am Jew Arch	0002-905X		Am Jew Arch
American Jewish historical quarterly	Am Jew Hist Q	0002-9068		Am Jew Hist Q
American journal of agricultural economics	Am J Agric Econ	0002-9092		Am J Agric Econ
The American journal of anatomy	Am J Anat	0002-9106		Am. J. Anat.
American journal of botany	Am J Bot	0002-9122	1537-2197	Am. J. Bot.
The American journal of cardiology	Am J Cardiol	0002-9149	1879-1913	Am. J. Cardiol.
The American journal of clinical hypnosis	Am J Clin Hypn	0002-9157		Am J Clin Hypn
The American journal of clinical nutrition	Am J Clin Nutr	0002-9165	1938-3207	Am. J. Clin. Nutr.
American journal of clinical pathology	Am J Clin Pathol	0002-9173	1943-7722	Am. J. Clin. Pathol.
The American journal of comparative law	Am J Comp Law	0002-919X		Am J Comp Law
American journal of correction	Am J Correct	0002-9203		Am J Correct
The American journal of digestive diseases	Am J Dig Dis	0002-9211		Am J Dig Dis
American journal of diseases of children (1960)	Am J Dis Child	0002-922X		Am. J. Dis. Child.
The American journal of EEG technology	Am J EEG Technol	0002-9238		Am J EEG Technol
American journal of economics and sociology	Am J Econ Sociol	0002-9246		Am J Econ Sociol
American journal of enology and viticulture		0002-9254		Am. J. Enol. Vitic.
American journal of epidemiology	Am J Epidemiol	0002-9262	1476-6256	Am. J. Epidemiol.
The American journal of gastroenterology	Am J Gastroenterol	0002-9270	1572-0241	Am. J. Gastroenterol.
American journal of hospital pharmacy	Am J Hosp Pharm	0002-9289		Am J Hosp Pharm
American journal of human genetics	Am J Hum Genet	0002-9297	1537-6605	Am. J. Hum. Genet.
The American journal of international law	Am J Int Law	0002-9300		Am J Int Law
The American journal of legal history	Am J Leg Hist	0002-9319		Am J Leg Hist
The American journal of medical technology	Am J Med Technol	0002-9335		Am J Med Technol
The American journal of medicine	Am J Med	0002-9343	1555-7162	Am. J. Med.
American journal of mental deficiency	Am J Ment Defic	0002-9351		Am J Ment Defic
The American journal of nursing	Am J Nurs	0002-936X	1538-7488	Am J Nurs
American journal of obstetrics and gynecology	Am J Obstet Gynecol	0002-9378	1097-6868	Am. J. Obstet. Gynecol.
American journal of ophthalmology	Am J Ophthalmol	0002-9394	1879-1891	Am. J. Ophthalmol.
American journal of optometry and archives of American Academy of Optometry	Am J Optom Arch Am Acad Optom	0002-9408		Am J Optom Arch Am Acad Optom
American journal of orthodontics	Am J Orthod	0002-9416		Am J Orthod
The American journal of orthopsychiatry	Am J Orthopsychiatry	0002-9432	1939-0025	Am J Orthopsychiatry
The American journal of pathology	Am J Pathol	0002-9440	1525-2191	Am. J. Pathol.
American journal of pharmaceutical education	Am J Pharm Educ	0002-9459	1553-6467	Am J Pharm Educ
American journal of pharmacy and the sciences supporting public health	Am J Pharm Sci Support Public Health	0002-9467		Am J Pharm Sci Support Public Health
American journal of philology	Am J Philol	0002-9475	1086-3168	Am J Philol
American journal of physical anthropology	Am J Phys Anthropol	0002-9483	1096-8644	Am. J. Phys. Anthropol.
American journal of physical medicine	Am J Phys Med	0002-9491		Am J Phys Med
American journal of physics	Am J Phys	0002-9505		Am J Phys
The American journal of physiology	Am J Physiol	0002-9513		Am. J. Physiol.
American journal of proctology	Am J Proctol	0002-9521		Am J Proctol
The American journal of psychiatry	Am J Psychiatry	0002-953X	1535-7228	Am J Psychiatry
American journal of psychoanalysis	Am J Psychoanal	0002-9548	1573-6741	Am J Psychoanal
The American journal of psychology	Am J Psychol	0002-9556	1939-8298	Am J Psychol
American journal of psychotherapy	Am J Psychother	0002-9564		Am J Psychother
American journal of public health and the nation's health	Am J Public Health Nations Health	0002-9572		Am J Public Health Nations Health
The American journal of roentgenology, radium therapy, and nuclear medicine	Am J Roentgenol Radium Ther Nucl Med	0002-9580		Am J Roentgenol Radium Ther Nucl Med
American journal of science	Am J Sci	0002-9599		Am J Sci
AJS; American journal of sociology	AJS	0002-9602	1537-5390	Am. J. Sociol.
American journal of surgery	Am J Surg	0002-9610	1879-1883	Am. J. Surg.
The American journal of the medical sciences	Am J Med Sci	0002-9629	1538-2990	Am. J. Med. Sci.
The American journal of tropical medicine and hygiene	Am J Trop Med Hyg	0002-9637	1476-1645	Am. J. Trop. Med. Hyg.
American journal of veterinary research	Am J Vet Res	0002-9645	1943-5681	Am. J. Vet. Res.
American laundry digest	Am Laund Dig	0002-9718		Am Laund Dig
American libraries	Am Libr	0002-9769		Am Libr
American literature; a journal of literary history, criticism and bibliography	Am Lit	0002-9831		Am Lit
The American mathematical monthly : the official journal of the Mathematical Association of America	Am Math Mon	0002-9890		Am Math Mon
Notices of the American Mathematical Society. American Mathematical Society	Not Am Math Soc	0002-9920	1088-9477	Not Am Math Soc
Proceedings of the American Mathematical Society. American Mathematical Society	Proc Am Math Soc	0002-9939	1088-6826	Proc Am Math Soc
Transactions of the American mathematical society	Trans Am Math Soc	0002-9947	1088-6850	Trans Am Math Soc
Journal of the American Medical Association	J Am Med Assoc	0002-9955		J Am Med Assoc
Transactions of the American Microscopical Society	Trans Am Microsc Soc	0003-0023		Trans Am Microsc Soc
The American midland naturalist		0003-0031		Am. Midl. Nat.
The American mineralogist		0003-004X		Am. Mineral.
American Museum novitates		0003-0082		Am. Mus. Novit.
Bulletin of the American Museum of Natural History		0003-0090		Bull. Am. Mus. Nat. Hist.
The American naturalist	Am Nat	0003-0147	1537-5323	Am. Nat.
The American neptune	Am Neptune	0003-0155		Am Neptune
Transactions of the American Nuclear Society	Trans Am Nucl Soc	0003-018X		Trans Am Nucl Soc
Journal of the American Oil Chemists' Society	J Am Oil Chem Soc	0003-021X	1558-9331	J Am Oil Chem Soc
Journal of the American Optometric Association	J Am Optom Assoc	0003-0244		J Am Optom Assoc
Journal of the American Oriental Society. American Oriental Society	J Am Orient Soc	0003-0279		J Am Orient Soc
Journal of the American Pharmaceutical Association	J Am Pharm Assoc	0003-0465		J Am Pharm Assoc
The American philatelist	Am Philat	0003-0473		Am Philat
American philosophical quarterly	Am Philos Q	0003-0481		Am Philos Q
Proceedings of the American Philosophical Society	Proc Am Philos Soc	0003-049X		Proc Am Philos Soc
Journal of the American Podiatry Association	J Am Podiatry Assoc	0003-0538		J Am Podiatry Assoc
The American political science review	Am Polit Sci Rev	0003-0554		Am Polit Sci Rev
American potato journal	Am Potato J	0003-0589		Am Potato J
Pharmacy times	Pharm Times	0003-0627		Pharm Times
Bulletin - American Protestant Hospital Association	Bull Am Protestant Hosp Assoc	0003-0635		Bull Am Protestant Hosp Assoc
Journal of the American Psychoanalytic Association	J Am Psychoanal Assoc	0003-0651	1941-2460	J Am Psychoanal Assoc
The American psychologist	Am Psychol	0003-066X	1935-990X	Am Psychol
American quarterly	Am Q	0003-0678	1080-6490	Am Q
The American review of respiratory disease	Am Rev Respir Dis	0003-0805		Am. Rev. Respir. Dis.
The American scholar	Am Scholar	0003-0937		Am Scholar
The American school board journal	Am Sch Board J	0003-0953		Am Sch Board J
Bulletin of the American Schools of Oriental Research. American Schools of Oriental Research	Bull Am Schools Orient Res	0003-097X		Bull Am Schools Orient Res
Journal of the American Scientific Affiliation. American Scientific Affiliation	J Am Sci Affil	0003-0988		J Am Sci Affil
American scientist	Am Sci	0003-0996		Am. Sci.
The Journal of the American Society for Geriatric Dentistry	J Am Soc Geriatr Dent	0003-1054		J Am Soc Geriatr Dent
Journal of the American Society for Horticultural Science. American Society for Horticultural Science	J Am Soc Hortic Sci	0003-1062		J. Am. Soc. Hortic. Sci.
The Journal of the American Society for Psychical Research	J Am Soc Psych Res	0003-1070		J Am Soc Psych Res
Journal of the American Society for the Study of Orthodontics. American Society for the Study of Orthodontics	J Am Soc Study Orthod	0003-1089		J Am Soc Study Orthod
The American Society Legion of Honor magazine	Am Soc Legion Honor Mag	0003-1097		Am Soc Legion Honor Mag
The Bulletin of the American Society of Papyrologists. American Society of Papyrologists	Bull Am Soc Papyrol	0003-1186	1938-6958	Bull Am Soc Papyrol
The Journal of the American Society of Psychosomatic Dentistry and Medicine	J Am Soc Psychosom Dent Med	0003-1194		J Am Soc Psychosom Dent Med
American sociological review	Am Sociol Rev	0003-1224		Am Sociol Rev
The American sociologist	Am Sociol	0003-1232		Am Sociol
American speech	Am Speech	0003-1283		Am Speech
The American statistician	Am Stat	0003-1305		Am Stat
The American surgeon	Am Surg	0003-1348	1555-9823	Am Surg
The American University law review	Am Univ Law Rev	0003-1453		Am Univ Law Rev
Journal of the American Veterinary Medical Association	J Am Vet Med Assoc	0003-1488	1943-569X	J. Am. Vet. Med. Assoc.
Journal - American Water Works Association	J Am Water Works Assoc	0003-150X		J Am Water Works Assoc
American zoologist	Am Zool	0003-1569		Am. Zool.
Americas (Academy of American Franciscan History)	Americas (Acad Am Francisc Hist)	0003-1615		Americas (Acad Am Francisc Hist)
Anaesthesia	Anaesthesia	0003-2409	1365-2044	Anaesthesia
Der Anaesthesist	Anaesthesist	0003-2417	1432-055X	Anaesthesist
Anais Azevedos	An Azevedos	0003-2425		An Azevedos
Anais paulistas de medicina e cirurgia	An Paul Med Cir	0003-245X		An Paul Med Cir
Anales de medicina	An Med (Barc)	0003-2514		An Med (Barc)
Anales espanoles de odontoestomatologia	An Esp Odontoestomatol	0003-2557		An Esp Odontoestomatol
Analise Social	Anal Soc	0003-2573		Anal Soc
Analysis	Analysis	0003-2638		Analysis
The Analyst	Analyst	0003-2654	1364-5528	Analyst
Analytica chimica acta	Anal Chim Acta	0003-2670	1873-4324	Anal. Chim. Acta
Analytical biochemistry	Anal Biochem	0003-2697	1096-0309	Anal. Biochem.
Analytical chemistry	Anal Chem	0003-2700	1520-6882	Anal. Chem.
Analytical letters	Anal Lett	0003-2719		Anal Lett
The Anatomical record	Anat Rec	0003-276X	1097-0185	Anat. Rec.
Journal of the Anatomical Society of India	J Anat Soc India	0003-2778		J Anat Soc India
Anatomischer Anzeiger	Anat Anz	0003-2786		Anat Anz
Andover Newton quarterly	Andover Newton Q	0003-2972		Andover Newton Q
Anesthesia and analgesia	Anesth Analg	0003-2999	1526-7598	Anesth. Analg.
Anesthesia progress	Anesth Prog	0003-3006		Anesth Prog
Anesthesie, analgesie, reanimation	Anesth Analg (Paris)	0003-3014		Anesth Analg (Paris)
Anesthesiology	Anesthesiology	0003-3022	1528-1175	Anesthesiology
Angeiologie	Angeiologie	0003-3049		Angeiologie
Angelicum	Angelicum	0003-3081		Angelicum
Angewandte Parasitologie	Angew Parasitol	0003-3162		Angew Parasitol
Angiologia	Angiologia	0003-3170		Angiologia
Angiologica	Angiologica	0003-3189		Angiologica
Angiology	Angiology	0003-3197	1940-1574	Angiology
The Angle orthodontist	Angle Orthod	0003-3219	1945-7103	Angle Orthod
Anglican theological review	Anglican Theol Rev	0003-3286		Anglican Theol Rev
Journal (Anglo-Continental Dental Society)	J Anglocont Dent Soc	0003-3324		J Anglocont Dent Soc
Anglo-German medical review. Deutsch-englische medizinische Rundschau	Anglo Ger Med Rev	0003-3332		Anglo Ger Med Rev
Animal behaviour	Anim Behav	0003-3472		Anim Behav
Animal blood groups and biochemical genetics	Anim Blood Groups Biochem Genet	0003-3480		Anim Blood Groups Biochem Genet
Animal production	Anim Prod	0003-3561		Anim Prod
Annals of science	Ann Sci	0003-3790		Ann Sci
Annalen der Physik	Ann Phys	0003-3804	1521-3889	Ann Phys
Annales botanici Fennici		0003-3847		Ann. Bot. Fenn.
Annales chirurgiae et gynaecologiae Fenniae	Ann Chir Gynaecol Fenn	0003-3855		Ann Chir Gynaecol Fenn
Annales d'anatomie pathologique	Ann Anat Pathol (Paris)	0003-3871		Ann Anat Pathol (Paris)
Annales de biologie animale, biochimie, biophysique	Ann Biol Anim Biochim Biophys	0003-388X		Ann Biol Anim Biochim Biophys
Annales de biologie clinique	Ann Biol Clin (Paris)	0003-3898	1950-6112	Ann. Biol. Clin. (Paris)
Annales de cardiologie et d'angeiologie	Ann Cardiol Angeiol (Paris)	0003-3928	1768-3181	Ann Cardiol Angeiol (Paris)
Annales de chirurgie	Ann Chir	0003-3944		Ann Chir
Annales de chirurgie infantile	Ann Chir Infant	0003-3952		Ann Chir Infant
Annales de chirurgie plastique	Ann Chir Plast	0003-3960		Ann Chir Plast
Annales de dermatologie et de syphiligraphie	Ann Dermatol Syphiligr (Paris)	0003-3979		Ann Dermatol Syphiligr (Paris)
Annales de genetique	Ann Genet	0003-3995		Ann. Genet.
Annales de genetique et de selection animale	Ann Genet Sel Anim	0003-4002		Ann. Genet. Sel. Anim.
Annales de geographie	Ann Georgr	0003-4010		Ann Georgr
Annales de la nutrition et de l'alimentation	Ann Nutr Aliment	0003-4037		Ann Nutr Aliment
Annales de l'anesthesiologie francaise	Ann Anesthesiol Fr	0003-4061		Ann Anesthesiol Fr
Annales de limnologie		0003-4088		Ann. Limnol.
Annales de medecine interne	Ann Med Interne (Paris)	0003-410X		Ann Med Interne (Paris)
Annales de medecine veterinaire	Ann Med Vet	0003-4118		Ann Med Vet
Annales de Normandie	Ann Normandie	0003-4134		Ann Normandie
Annales de parasitologie humaine et comparee	Ann Parasitol Hum Comp	0003-4150		Ann Parasitol Hum Comp
Annales de physique	Ann Phys (Paris)	0003-4169		Ann Phys (Paris)
Annales de radiologie	Ann Radiol (Paris)	0003-4185		Ann Radiol (Paris)
Annales de recherches veterinaires. Annals of veterinary research	Ann Rech Vet	0003-4193		Ann. Rech. Vet.
Annales d'endocrinologie	Ann Endocrinol (Paris)	0003-4266		Ann. Endocrinol. (Paris)
Annales d'histochimie	Ann Histochim	0003-4355		Ann Histochim
Annales d'oculistique	Ann Ocul (Paris)	0003-4371		Ann Ocul (Paris)
Annales d'oto-laryngologie et de chirurgie cervico faciale : bulletin de la Societe d'oto-laryngologie des hopitaux de Paris	Ann Otolaryngol Chir Cervicofac	0003-438X		Ann Otolaryngol Chir Cervicofac
Annales du Midi	Ann Midi	0003-4398		Ann Midi
Annales d'urologie	Ann Urol (Paris)	0003-4401	1768-3378	Ann Urol (Paris)
Annales historiques de la Revolution francaise	Ann Hist Revolut Fr	0003-4436		Ann Hist Revolut Fr
Les Annales homeopathiques francaises	Ann Homeopath Fr	0003-4444		Ann Homeopath Fr
Annales medicales de Nancy	Ann Med Nancy	0003-4460		Ann Med Nancy
Annales medicinae experimentalis et biologiae Fenniae	Ann Med Exp Biol Fenn	0003-4479		Ann Med Exp Biol Fenn
Annales medico-psychologiques	Ann Med Psychol (Paris)	0003-4487		Ann Med Psychol (Paris)
Shonika kiyo. Annales paediatrici Japonici	Shonika Kiyo	0003-4495		Shonika Kiyo
Annales pharmaceutiques francaises	Ann Pharm Fr	0003-4509		Ann Pharm Fr
Annales Universitatis Saraviensis. Medizin	Ann Univ Sarav Med	0003-4533		Ann Univ Sarav Med
Annales zoologici / Polska Akademia Nauk, Instytut Zoologiczny		0003-4541		Annal Zool
Annales zoologici Fennici	Ann Zool Fennici	0003-455X	1797-2450	Ann. Zool. Fenn.
Annali di chimica	Ann Chim	0003-4592		Ann Chim
Annali di microbiologia ed enzimologia	Ann Microbiol Enzimol	0003-4649		Ann Microbiol Enzimol
Annali di ostetricia e ginecologia	Ann Ostet Ginecol	0003-4657		Ann Ostet Ginecol
Annali di ottalmologia e clinica oculistica	Ann Ottalmol Clin Ocul	0003-4665		Ann Ottalmol Clin Ocul
Annali di radiologia diagnostica	Ann Radiol Diagn (Bologna)	0003-4673		Ann Radiol Diagn (Bologna)
Annali italiani di chirurgia	Ann Ital Chir	0003-469X	2239-253X	Ann Ital Chir
Annali Sclavo. Collana monografica	Ann Sclavo Collana Monogr	0003-472X		Ann Sclavo Collana Monogr
Annals of allergy	Ann Allergy	0003-4738		Ann Allergy
The Annals of applied biology	Ann Appl Biol	0003-4746		Ann. Appl. Biol.
Annals of clinical research	Ann Clin Res	0003-4762		Ann. Clin. Res.
Annals of dentistry	Ann Dent	0003-4770		Ann Dent
Annals of human genetics	Ann Hum Genet	0003-4800	1469-1809	Ann. Hum. Genet.
Annals of internal medicine	Ann Intern Med	0003-4819	1539-3704	Ann. Intern. Med.
Annals of Iowa	Ann Iowa	0003-4827		Ann Iowa
Annals of mathematics	Ann Math	0003-486X	1939-8980	Ann Math
The Annals of occupational hygiene	Ann Occup Hyg	0003-4878	1475-3162	Ann Occup Hyg
Annals of ophthalmology	Ann Ophthalmol	0003-4886		Ann Ophthalmol
The Annals of otology, rhinology, and laryngology	Ann Otol Rhinol Laryngol	0003-4894	1943-572X	Ann. Otol. Rhinol. Laryngol.
Rheumatology and physical medicine	Rheumatol Phys Med	0003-4908		Rheumatol Phys Med
Annals of physics	Ann Phys (N Y)	0003-4916		Ann Phys (N Y)
Annals of surgery	Ann Surg	0003-4932	1528-1140	Ann. Surg.
Annals of the rheumatic diseases	Ann Rheum Dis	0003-4967	1468-2060	Ann. Rheum. Dis.
The Annals of thoracic surgery	Ann Thorac Surg	0003-4975	1552-6259	Ann. Thorac. Surg.
Annals of tropical medicine and parasitology	Ann Trop Med Parasitol	0003-4983	1364-8594	Ann Trop Med Parasitol
L' Annee biologique	Annee Biol	0003-5017		Annee Biol
L'annee psychologique	Annee Psychol	0003-5033		Annee Psychol
Annotationes zoologicae Japonenses	Annot Zool Jpn	0003-5092		Annot Zool Jpn
Antarctic journal of the United States / National Science Foundation	Antarct J US	0003-5335		Antarct J US
Anthropologiai kozlemenyek	Anthropol Kozl	0003-5440		Anthropol Kozl
Anthropologica	Anthropologica	0003-5459		Anthropologica
Anthropological quarterly	Anthropol Q	0003-5491		Anthropol Q
Jinruigaku zasshi = The Journal of the Anthropological Society of Nihon	Jinruigaku Zasshi	0003-5505		Jinruigaku Zasshi
L'Anthropologie	Anthropologie	0003-5521		Anthropologie
Anthropologischer Anzeiger; Bericht uber die biologisch-anthropologische Literatur	Anthropol Anz	0003-5548		Anthropol Anz
Anthropology U.C.L.A	Anthropol UCLA	0003-5564		Anthropol UCLA
Antibiotica	Antibiotica	0003-5629		Antibiotica
Antibiotiki	Antibiotiki	0003-5637		Antibiotiki
Antiek	Antiek	0003-5653		Antiek
Antike Welt	Antike Welt	0003-570X		Antike Welt
The Antioch review	Antioch Rev	0003-5769		Antioch Rev
Antiquity	Antiquity	0003-598X		Antiquity
The Antiseptic	Antiseptic	0003-5998		Antiseptic
Antonie van Leeuwenhoek	Antonie Van Leeuwenhoek	0003-6072	1572-9699	Antonie Van Leeuwenhoek
Anzeiger fur die Altertumswissenschaft	Anz Altertwiss	0003-6293		Anz Altertwiss
Apeiron (Clayton, Vic.)	Apeiron	0003-6390		Apeiron
Apex	Apex	0003-6439		Apex
Applicable analysis	Appl Anal	0003-6811		Appl Anal
Applied biochemistry and microbiology		0003-6838		Appl. Biochem. Microbiol.
Applied economics	Appl Econ	0003-6846		Appl Econ
Applied entomology and zoology		0003-6862	1347-605X	Appl. Entomol. Zool. (Jpn.)
Applied ergonomics	Appl Ergon	0003-6870	1872-9126	Appl Ergon
Applied microbiology	Appl Microbiol	0003-6919		Appl Microbiol
Applied optics	Appl Opt	0003-6935	1539-4522	Appl Opt
Applied physics letters	Appl Phys Lett	0003-6951		Appl Phys Lett
Applied spectroscopy	Appl Spectrosc	0003-7028	1943-3530	Appl Spectrosc
The Appraisal journal	Appraisal J	0003-7087		Appraisal J
Apres-demain / fonde par la Ligue des droits de l'homme	Apres Demain	0003-7176		Apres Demain
Archaologischer Anzeiger	Archaeol Anz	0003-8105		Archaeol Anz
Archaeology	Archaeology	0003-8113		Archaeology
Archaeometry	Archaeometry	0003-813X	1475-4754	Archaeometry
Architectural record	Archit Rec	0003-858X		Archit Rec
Architectural science review	Archit Sci Rev	0003-8628		Archit Sci Rev
Archiv der Julius Klaus-Stiftung fur Vererbungsforschung, Sozialanthropologie und Rassenhygiene	Arch Julius Klaus Stift Vererbungsforsch Sozialanthropol Rassenhyg	0003-8881		Arch Julius Klaus Stift Vererbungsforsch Sozialanthropol Rassenhyg
Archiv for pharmaci og chemi	Arch Pharm Chem (Kbh)	0003-8938		Arch Pharm Chem (Kbh)
Archiv fur die gesamte Virusforschung	Arch Gesamte Virusforsch	0003-9012		Arch Gesamte Virusforsch
Archiv fur experimentelle Veterinarmedizin	Arch Exp Veterinarmed	0003-9055		Arch Exp Veterinarmed
Archiv fur Geschwulstforschung	Arch Geschwulstforsch	0003-911X		Arch. Geschwulstforsch.
Archiv fur Gynakologie	Arch Gynakol	0003-9128		Arch Gynakol
Archiv fur Hydrobiologie		0003-9136		Arch. Hydrobiol.
Archiv fur Hygiene und Bakteriologie	Arch Hyg Bakteriol	0003-9144		Arch Hyg Bakteriol
Nihon geka hokan. Archiv fur japanische Chirurgie	Nihon Geka Hokan	0003-9152		Nihon Geka Hokan
Archiv fur Kinderheilkunde	Arch Kinderheilkd	0003-9179		Arch Kinderheilkd
Archiv fur dermatologische Forschung	Arch Dermatol Forsch	0003-9187		Arch Dermatol Forsch
Archiv fur klinische und experimentelle Ohren- Nasen- und Kehlkopfheilkunde	Arch Klin Exp Ohren Nasen Kehlkopfheilkd	0003-9195		Arch Klin Exp Ohren Nasen Kehlkopfheilkd
Archiv fur Kreislaufforschung	Arch Kreislaufforsch	0003-9217		Arch Kreislaufforsch
Archiv fur Kriminologie	Arch Kriminol	0003-9225		Arch Kriminol
Archiv fur Kultur-geschichte	Arch Kulturgesch	0003-9233		Arch Kulturgesch
Archiv fur lebensmittelhygiene	Arch Lebensmittelhyg	0003-925X		Arch. Lebensmittelhyg.
Archiv fur Mikrobiologie	Arch Mikrobiol	0003-9276		Arch Mikrobiol
Archiv fur orthopadische und Unfall-Chirurgie	Arch Orthop Unfallchir	0003-9330		Arch Orthop Unfallchir
Zeitschrift fur Physiotherapie	Z Physiother	0003-9357		Z Physiother
Archiv fur Protistenkunde		0003-9365		Arch. Protistenkunde
Archiv fur Psychiatrie und Nervenkrankheiten	Arch Psychiatr Nervenkr	0003-9373		Arch Psychiatr Nervenkr
Archiv fur Tierernahrung	Arch Tierernahr	0003-942X		Arch Tierernahr
Archiv fur Tierzucht		0003-9438		Arch. Tierz.
Archiv fur Toxikologie	Arch Toxikol	0003-9446		Arch Toxikol
Archivalische Zeitschrift	Arch Z	0003-9497		Arch Z
Der Archivar	Archivar	0003-9500		Archivar
Archive for history of exact sciences	Arch Hist Exact Sci	0003-9519	1432-0657	Arch Hist Exact Sci
Archive for rational mechanics and analysis	Arch Ration Mech Anal	0003-9527	1432-0673	Arch Ration Mech Anal
Archives belges de dermatologie et de syphiligraphie	Arch Belg Dermatol Syphiligr	0003-956X		Arch Belg Dermatol Syphiligr
Archives belges de medecine sociale, hygiene, medecine du travail et medecine legale. Belgisch archief van sociale geneeskunde, hygiene, arbeidsgeneeskunde en gerechtelijke geneeskunde	Arch Belg Med Soc	0003-9578		Arch Belg Med Soc
Archives d'anatomie microscopique et de morphologie experimentale	Arch Anat Microsc Morphol Exp	0003-9594		Arch Anat Microsc Morphol Exp
Archives d'anatomie pathologique	Arch Anat Pathol (Paris)	0003-9608		Arch Anat Pathol (Paris)
Archives de biologie	Arch Biol (Liege)	0003-9624		Arch Biol (Liege)
Archives de philosophie	Arch Philos	0003-9632		Arch Philos
Archives de psychologie	Arch Psychol (Geneve)	0003-9640		Arch Psychol (Geneve)
Archives des maladies du coeur et des vaisseaux	Arch Mal Coeur Vaiss	0003-9683		Arch Mal Coeur Vaiss
Archives des maladies professionnelles de medecine du travail et de securite sociale	Arch Mal Prof	0003-9691		Arch Mal Prof
Archives des sciences / editees par la Societe de physique et d'histoire naturelle de Geneve	Arch Sci	0003-9705		Arch Sci
Archives des sciences physiologiques	Arch Sci Physiol (Paris)	0003-9713		Arch Sci Physiol (Paris)
Archives d'ophtalmologie et revue generale d'ophtalmologie	Arch Ophtalmol Rev Gen Ophtalmol	0003-973X		Arch Ophtalmol Rev Gen Ophtalmol
Archives europeennes de sociologie. European journal of sociology. Europaisches Archiv fur Soziologie	Arch Eur Sociol	0003-9756		Arch Eur Sociol
Archives francaises de pediatrie	Arch Fr Pediatr	0003-9764		Arch. Fr. Pediatr.
Archives francaises des maladies de l'appareil digestif	Arch Fr Mal App Dig	0003-9772		Arch Fr Mal App Dig
Archives internationales de pharmacodynamie et de therapie	Arch Int Pharmacodyn Ther	0003-9780		Arch Int Pharmacodyn Ther
Archives internationales de physiologie et de biochimie	Arch Int Physiol Biochim	0003-9799		Arch. Int. Physiol. Biochim.
Archives internationales d'histoire des sciences	Arch Int Hist Sci (Paris)	0003-9810		Arch Int Hist Sci (Paris)
Archives italiennes de biologie	Arch Ital Biol	0003-9829		Arch Ital Biol
Archives mediterraneennes de medecine	Arch Mediterr Med	0003-9845		Arch Mediterr Med
Archives of biochemistry and biophysics	Arch Biochem Biophys	0003-9861	1096-0384	Arch. Biochem. Biophys.
Archives of dermatology	Arch Dermatol	0003-987X	1538-3652	Arch Dermatol
Archives of disease in childhood	Arch Dis Child	0003-9888	1468-2044	Arch. Dis. Child.
Archives of environmental health	Arch Environ Health	0003-9896		Arch. Environ. Health
Archives of general psychiatry	Arch Gen Psychiatry	0003-990X	1538-3636	Arch. Gen. Psychiatry
Archives of internal medicine	Arch Intern Med	0003-9926	1538-3679	Arch. Intern. Med.
Archives of neurology	Arch Neurol	0003-9942	1538-3687	Arch. Neurol.
Archives of ophthalmology	Arch Ophthalmol	0003-9950	1538-3601	Arch. Ophthalmol.
Archives of oral biology	Arch Oral Biol	0003-9969	1879-1506	Arch. Oral Biol.
Archives of otolaryngology (Chicago, Ill. : 1960)	Arch Otolaryngol	0003-9977		Arch Otolaryngol
Archives of pathology & laboratory medicine	Arch Pathol Lab Med	0003-9985	1543-2165	Arch. Pathol. Lab. Med.
Archives of physical medicine and rehabilitation	Arch Phys Med Rehabil	0003-9993	1532-821X	Arch Phys Med Rehabil
Archives of sexual behavior	Arch Sex Behav	0004-0002	1573-2800	Arch Sex Behav
Archives of surgery (Chicago, Ill. : 1960)	Arch Surg	0004-0010	1538-3644	Arch Surg
Archives roumaines de pathologie experimentales et de microbiologie	Arch Roum Pathol Exp Microbiol	0004-0037		Arch Roum Pathol Exp Microbiol
Archivio "de Vecchi" per l'anatomia patologica e la medicina clinica	Arch De Vecchi Anat Patol	0004-0061		Arch De Vecchi Anat Patol
Archivio di fisiologia	Arch Fisiol	0004-0096		Arch Fisiol
Archivio di medicina interna	Arch Med Interna	0004-010X		Arch Med Interna
Archivio di ortopedia	Arch Ortop	0004-0118		Arch Ortop
Archivio di ostetricia e ginecologia	Arch Ostet Ginecol	0004-0126		Arch Ostet Ginecol
Archivio di ottalmologia	Arch Ottamol	0004-0134		Arch Ottamol
Archivio di patologia e clinica medica	Arch Patol Clin Med	0004-0142		Arch Patol Clin Med
Archivio di psicologia, neurologia e psichiatria	Arch Psicol Neurol Psichiatr	0004-0150		Arch Psicol Neurol Psichiatr
Archivio di scienze biologiche	Arch Sci Biol (Bologna)	0004-0169		Arch Sci Biol (Bologna)
Archivio Monaldi per la tisiologia e le malattie dell'apparato respiratorio	Arch Monaldi	0004-0185		Arch Monaldi
Archivio "E. Maragliano" di patologia e clinica	Arch Maragliano Patol Clin	0004-0193		Arch Maragliano Patol Clin
Archivio italiano delle malattie dell'apparato digerente	Arch Ital Mal Appar Dig	0004-0215		Arch Ital Mal Appar Dig
Archivio italiano di anatomia e di embriologia. Italian journal of anatomy and embryology	Arch Ital Anat Embriol	0004-0223		Arch Ital Anat Embriol
Archivio italiano di anatomia e istologia patologica	Arch Ital Anat Istol Patol	0004-0231		Arch Ital Anat Istol Patol
Archivio italiano di chirurgia	Arch Ital Chir	0004-024X		Arch Ital Chir
Archivio italiano di otologia, rinologia e laringologia	Arch Ital Otol Rinol Laringol	0004-0258		Arch Ital Otol Rinol Laringol
Archivio italiano di patologia e clinica dei tumori	Arch Ital Patol Clin Tumori	0004-0266		Arch Ital Patol Clin Tumori
Archivio italiano di pediatria e puericoltura	Arch Ital Pediatr Pueric	0004-0274		Arch Ital Pediatr Pueric
Archivio italiano di scienze mediche tropicali e di parassitologia	Arch Ital Sci Med Trop Parassitol	0004-0282		Arch Ital Sci Med Trop Parassitol
Archivio italiano di urologia e nefrologia	Arch Ital Urol Nefrol	0004-0290		Arch Ital Urol Nefrol
Archivio per le scienze mediche	Arch Sci Med (Torino)	0004-0312		Arch Sci Med (Torino)
Archivio stomatologico	Arch Stomatol (Napoli)	0004-0320		Arch Stomatol (Napoli)
Archivmitteilungen	Archivmitteilungen	0004-038X		Archivmitteilungen
Archivni casopis	Arch Cas	0004-0398		Arch Cas
Archivo espanol de arte	Arch Esp Arte	0004-0428		Arch Esp Arte
Archivo espanol de morfologia	Arch Esp Morfol	0004-0436		Arch Esp Morfol
Archivo ibero-americano	Arch Ibero Am	0004-0452		Arch Ibero Am
Archivio veterinario italiano	Arch Vet Ital	0004-0479		Arch Vet Ital
Archivos argentinos de tisiologia y neumonologia	Arch Argent Tisiol Neumonol	0004-0509		Arch Argent Tisiol Neumonol
Archivos argentinos de enfermedades del aparato digestivo	Arch Argent Enferm Apar Dig	0004-0517		Arch Argent Enferm Apar Dig
Archivos de biologia y medicina experimentales	Arch Biol Med Exp (Santiago)	0004-0533		Arch. Biol. Med. Exp.
Archivos de medicina experimental; trabajos del Instituto Nacional de Ciencias Medicas	Arch Med Exp	0004-0568		Arch Med Exp
Archivos de neurobiologia	Arch Neurobiol (Madr)	0004-0576		Arch Neurobiol (Madr)
Archivos de pediatria del Uruguay	Arch Pediatr Urug	0004-0584		Arch Pediatr Urug
Archivos dominicanos de pediatria	Arch Domin Pediatr	0004-0606		Arch Domin Pediatr
Archivos espanoles de urologia	Arch Esp Urol	0004-0614	1576-8260	Arch. Esp. Urol.
Archivos latinoamericanos de nutricion	Arch Latinoam Nutr	0004-0622		Arch Latinoam Nutr
Archivos venezolanos de puericultura y pediatria	Arch Venez Pueric Pediatr	0004-0649		Arch Venez Pueric Pediatr
Archivum chirurgicum Neerlandicum	Arch Chir Neerl	0004-0657		Arch Chir Neerl
Archivum franciscanum historicum : periodica publicatio trimestris cura pp. Collegii D. Bonaventurae	Arch Franciscanum Hist	0004-0665		Arch Franciscanum Hist
Archivum histologicum Japonicum = Nihon soshikigaku kiroku	Arch Histol Jpn	0004-0681		Arch Histol Jpn
Archivum immunologiae et therapiae experimentalis	Arch Immunol Ther Exp (Warsz)	0004-069X	1661-4917	Arch. Immunol. Ther. Exp. (Warsz.)
Archiwum historii medycyny	Arch Hist Med (Warsz)	0004-0762		Arch Hist Med (Warsz)
L' Arcispedale S. Anna di Ferrara	Arcisp S Anna Ferrara	0004-0819		Arcisp S Anna Ferrara
Arctic		0004-0843		Arctic
Arethusa	Arethusa	0004-0975	1080-6504	Arethusa
Das Argument	Argument	0004-1157		Argument
Arhiv za higijenu rada i toksikologiju	Arh Hig Rada Toksikol	0004-1254		Arh Hig Rada Toksikol
Arhiv za zastitu majke i djeteta. Archives of mother and child welfare. Archives pour la protection de la mere et de l'enfant	Arh Zast	0004-1289		Arh Zast
Ariel. Ari&#x02be;el	Ariel (Jerus)	0004-1343		Ariel (Jerus)
Arizona and the West	Ariz West	0004-1408		Ariz West
The Arizona dental journal	Ariz Dent J	0004-1459		Ariz Dent J
Arizona law review	Ariz Law Rev	0004-153X		Ariz Law Rev
Arizona medicine	Ariz Med	0004-1556		Ariz Med
The Arizona nurse	Ariz Nurse	0004-1599		Ariz Nurse
The Ark-light newsletter	Ark Light Newsl	0004-1696		Ark Light Newsl
The Arkansas dental journal	Ark Dent J	0004-1769		Ark Dent J
The Arkansas historical quarterly	Ark Hist Q	0004-1823		Ark Hist Q
Arkansas law review	Ark Law Rev	0004-1831		Ark Law Rev
The Journal of the Arkansas Medical Society	J Ark Med Soc	0004-1858		J Ark Med Soc
Arkhiv anatomii, gistologii i embriologii	Arkh Anat Gistol Embriol	0004-1947		Arkh Anat Gistol Embriol
Arkhiv patologii	Arkh Patol	0004-1955	2309-1266	Arkh. Patol.
Arhiv za farmaciju	Arh Farm (Belgr)	0004-1963		Arh Farm (Belgr)
Chemica scripta	Chem Scr	0004-2056		Chem Scr
Armed Forces medical journal, India	Armed Forces Med J India	0004-2218		Armed Forces Med J India
The Armenian review	Armen Rev	0004-2366		Armen Rev
The Army quarterly and defence journal	Army Q Def J	0004-2552		Army Q Def J
Journal of the Arnold Arboretum. Arnold Arboretum	J Arnold Arbor	0004-2625		J Arnold Arbor
Arquivo de patologia	Arq Patol	0004-2714		Arq Patol
Arquivos brasileiros de endocrinologia e metabologia	Arq Bras Endocrinol Metabol	0004-2730	1677-9487	Arq Bras Endocrinol Metabol
Arquivos brasileiros de oftalmologia	Arq Bras Oftalmol	0004-2749	1678-2925	Arq Bras Oftalmol
Arquivos de gastroenterologia	Arq Gastroenterol	0004-2803	1678-4219	Arq Gastroenterol
Arquivos de higiene e saude publica	Arq Hig Saude Publica	0004-2811		Arq Hig Saude Publica
Arquivos de neuro-psiquiatria	Arq Neuropsiquiatr	0004-282X	1678-4227	Arq Neuropsiquiatr
Arquivos do Centro de Estudos da Faculdade de Odontologia da U. F. M. G	Arq Cent Estud Fac Odontol UFMG (Belo Horiz)	0004-2838		Arq Cent Estud Fac Odontol UFMG (Belo Horiz)
Ars medici	Ars Med	0004-2897		Ars Med
The Art bulletin	Art Bull	0004-3079		Art Bull
ARTnews	ARTnews	0004-3273		ARTnews
Artha vijnana : journal of the Gokhale Institute of Politics and Economics, Poona (India) = Artha vijnana : Gokhale Artha Sastra Samstha Dvara Prakasita Traimesika Patrika	Artha Vijnana	0004-3559		Artha Vijnana
Arthritis and rheumatism	Arthritis Rheum	0004-3591	1529-0131	Arthritis Rheum.
Artificial intelligence	Artif Intell	0004-3702	1872-7921	Artif Intell
Artificial limbs	Artif Limbs	0004-3729		Artif Limbs
Arzneimittel-Forschung	Arzneimittelforschung	0004-4172	1616-7066	Arzneimittelforschung
Program quarterly - The Asia Foundation. The Asia Foundation	Program Q Asia Found	0004-4458		Program Q Asia Found
The Asia magazine	Asia Mag	0004-4474		Asia Mag
Asia major	Asia Major	0004-4482		Asia Major
The Asian economic review	Asian Econ Rev	0004-4555		Asian Econ Rev
Asian medical journal	Asian Med J	0004-461X		Asian Med J
Asian studies (Quezon City, Philippines)	Asian Stud	0004-4679		Asian Stud
Asian survey	Asian Surv	0004-4687		Asian Surv
Revista de la Asociacion Bioquimica Argentina. Asociacion Bioquimica Argentina	Rev Asoc Bioquim Argent	0004-4768		Rev Asoc Bioquim Argent
Revista de la Asociacion Medica Argentina	Rev Asoc Med Argent	0004-4830		Rev Asoc Med Argent
Boletin de la Asociacion Medica de Puerto Rico	Bol Asoc Med P R	0004-4849		Bol Asoc Med P R
Revista de la Asociacion Odontologica Argentina	Rev Asoc Odontol Argent	0004-4881		Rev Asoc Odontol Argent
Archivos. Asociacion para Evitar la Ceguera en Mexico	Arch Asoc Evit Ceguera Mex	0004-489X		Arch Asoc Evit Ceguera Mex
Assignment children	Assignment Child	0004-5128		Assignment Child
Revista da Associacao Medica Brasileira	Rev Assoc Med Bras	0004-5241		Rev Assoc Med Bras
Revista da Associacao Medica de Minas Gerais	Rev Assoc Med Minas Gerais	0004-525X		Rev Assoc Med Minas Gerais
Revista da Associacao Medica do Rio Grande do Sul	Rev Assoc Med Rio Grande Do Sul	0004-5268		Rev Assoc Med Rio Grande Do Sul
Revista da Associacao Paulista de Cirurgioes Dentistas	Rev Assoc Paul Cir Dent	0004-5276		Rev Assoc Paul Cir Dent
Association & society manager	Assoc Soc Manager	0004-5292		Assoc Soc Manager
Bulletin de l'Association de geographes francais	Bull Assoc Geogr Fr	0004-5322		Bull Assoc Geogr Fr
Bulletin de l'Association des diplomes de microbiologie de la Faculte de pharmacie de Nancy	Bull Assoc Diplomes Microbiol Fac Pharm Nancy	0004-5373		Bull Assoc Diplomes Microbiol Fac Pharm Nancy
JAAMI; journal of the Association for the Advancement of Medical Instrumentation	J Assoc Adv Med Instrum	0004-5446		J Assoc Adv Med Instrum
Bulletin de l'Association francaise pour l'etude du cancer	Bull Assoc Fr Etud Cancer	0004-5497		Bull Assoc Fr Etud Cancer
Association management	Assoc Manage	0004-5578		Assoc Manage
Annals of the Association of American Geographers. Association of American Geographers	Ann Assoc Am Geogr	0004-5608		Ann Assoc Am Geogr
Annals of clinical biochemistry	Ann Clin Biochem	0004-5632	1758-1001	Ann. Clin. Biochem.
Journal - Association of Official Analytical Chemists	J Assoc Off Anal Chem	0004-5756		J Assoc Off Anal Chem
The Journal of the Association of Physicians of India	J Assoc Physicians India	0004-5772		J Assoc Physicians India
The Record of the Association of the Bar of the City of New York	Rec Assoc Bar City New York	0004-5837		Rec Assoc Bar City New York
The Astronomical journal	Astron J	0004-6256		Astron. J. (N. Y.)
Astronomy and astrophysics	Astron Astrophys	0004-6361		Astron Astrophys
The Astrophysical journal	Astrophys J	0004-637X		Astrophys. J.
Astrophysics and space science	Astrophys Space Sci	0004-640X		Astrophys Space Sci
L' Ateneo parmense. Sezione I, Acta bio-medica	Ateneo Parmense 1	0004-6531		Ateneo Parmense 1
Ateneo Veneto : revista di scienze, lettere ed arti	Ateneo Veneto	0004-6558		Ateneo Veneto
Archives de l'Institut Pasteur hellenique	Arch Inst Pasteur Hell	0004-6620		Arch Inst Pasteur Hell
Atlanta	Atlanta	0004-6701		Atlanta
Atlantic monthly (Boston, Mass. : 1971)	Atl Mon	0004-6795		Atl Mon
Atmospheric environment	Atmos Environ	0004-6981		Atmos. Environ.
Atomic energy law journal	At Energy Law J	0004-7104		At Energy Law J
Atomic energy review	At Energy Rev	0004-7112		At Energy Rev
Attualita di ostetricia e ginecologia	Attual Ostet Ginecol	0004-7317		Attual Ostet Ginecol
Journal of the Audio Engineering Society. Audio Engineering Society	J Audio Eng Soc	0004-7554		J Audio Eng Soc
The Auk	Auk	0004-8038		Auk
Ausgrabungen und Funde	Ausgrab Funde	0004-8127		Ausgrab Funde
Aussenwirtschaft : Zeitschrift fur internationale Wirtschaftsbeziehungen / herausgegeben vom Schweizerischen Institut fur Aussenwirtschafts- und Marktforschung an der Handels-Hochschule St. Gallen	Aussenwirtschaft	0004-8216		Aussenwirtschaft
Australian and New Zealand journal of medicine	Aust N Z J Med	0004-8291		Aust N Z J Med
The Australasian journal of dermatology	Australas J Dermatol	0004-8380	1440-0960	Australas. J. Dermatol.
The Australasian journal of pharmacy	Australas J Pharm	0004-8399		Australas J Pharm
Australasian journal of philosophy	Australas J Philos	0004-8402		Australas J Philos
Australasian radiology	Australas Radiol	0004-8461	1440-1673	Australas Radiol
The Australian & New Zealand journal of criminology	Aust N Z J Criminol	0004-8658		Aust N Z J Criminol
The Australian & New Zealand journal of obstetrics & gynaecology	Aust N Z J Obstet Gynaecol	0004-8666	1479-828X	Aust N Z J Obstet Gynaecol
The Australian and New Zealand journal of psychiatry	Aust N Z J Psychiatry	0004-8674	1440-1614	Aust N Z J Psychiatry
The Australian and New Zealand journal of surgery	Aust N Z J Surg	0004-8682		Aust N Z J Surg
The Australian and New Zealand journal of sociology	Aust N Z J Sociol	0004-8690		Aust N Z J Sociol
Annals of the Australian College of Dental Surgeons	Ann Aust Coll Dent Surg	0004-8895		Ann Aust Coll Dent Surg
Australian economic history review	Aust Econ Hist Rev	0004-8992		Aust Econ Hist Rev
Australian economic papers	Aust Econ Pap	0004-900X		Aust Econ Pap
The Australian economic review / Institute of Applied Economic Research	Aust Econ Rev	0004-9018		Aust Econ Rev
The Australian geographer	Aust Geogr	0004-9182		Aust Geogr
Australian geographical studies	Aust Geogr Stud	0004-9190		Aust Geogr Stud
Australian journal of agricultural research	Aust J Agric Res	0004-9409		Aust. J. Agric. Res.
Australian journal of biological sciences	Aust J Biol Sci	0004-9417		Aust. J. Biol. Sci.
Australian journal of chemistry	Aust J Chem	0004-9425	1445-0038	Aust. J. Chem.
The Australian journal of experimental biology and medical science	Aust J Exp Biol Med Sci	0004-945X		Aust J Exp Biol Med Sci
Australian journal of French studies	Aust J Fr Stud	0004-9468		Aust J Fr Stud
The Australian journal of physiotherapy	Aust J Physiother	0004-9514	1449-2059	Aust J Physiother
The Australian journal of politics and history	Aust J Polit Hist	0004-9522		Aust J Polit Hist
Australian journal of psychology	Aust J Psychol	0004-9530	1742-9536	Aust J Psychol
The Australian journal of statistics	Aust J Stat	0004-9581		Aust J Stat
Australian journal of zoology	Aust J Zool	0004-959X		Aust. J. Zool.
The Australian law journal	Aust Law J	0004-9611		Aust Law J
The Australian library journal	Aust Libr J	0004-9670		Aust Libr J
The Australian outlook	Aust Outlook	0004-9913		Aust Outlook
Australian paediatric journal	Aust Paediatr J	0004-993X		Aust Paediatr J
Australian psychologist	Aust Psychol	0005-0067		Aust Psychol
The Australian quarterly	Aust Q	0005-0091		Aust Q
Australian veterinary journal	Aust Vet J	0005-0423	1751-0813	Aust. Vet. J.
Automatica : the journal of IFAC, the International Federation of Automatic Control	Automatica (Oxf)	0005-1098		Automatica (Oxf)
The Volunteer leader	Volunt Leader	0005-1861		Volunt Leader
Avian diseases	Avian Dis	0005-2086		Avian Dis.
Aviation week & space technology	Aviat Week Space Technol	0005-2175		Aviat Week Space Technol
Azerbaidzhanskii meditsinskii zhurnal = Aserbaidschanische medizinische Zeitschrift	Azerbaidzhanskii Meditsinskii Zhurnal	0005-2523		Azerbaidzhanskii Meditsinskii Zhurnal
Aziia i Afrika segodnia	Aziia Afr Segodnia	0005-2574		Aziia Afr Segodnia
Aztlan	Aztlan	0005-2604		Aztlan
BC studies	B C Stud	0005-2949		B C Stud
BZB. Bayerisches Zahnarzteblatt	BZB Bayer Zahnarztebl	0005-3473		BZB Bayer Zahnarztebl
Bacteriological reviews	Bacteriol Rev	0005-3678		Bacteriol Rev
Baessler-Archiv; Beitrage zur Volkerkunde	Baessler Arch Beitr Volkerkd	0005-3856		Baessler Arch Beitr Volkerkd
Baltimore magazine	Baltim Mag	0005-4453		Baltim Mag
Banque	Banque	0005-5581		Banque
Baptist history and heritage	Baptist Hist Herit	0005-5719		Baptist Hist Herit
The Baptist quarterly	Baptist Q	0005-576X		Baptist Q
Barron's national business and financial weekly	Barrons	0005-6073		Barrons
Basteria		0005-6219		Basteria
Bayerisches Arzteblatt : amtliches Organ der Bayerischen Landesarztekammer und ihrer Bezirksvereine	Bayer Aztebl	0005-7126		Bayer Aztebl
The Baylor dental journal	Baylor Dent J	0005-7258		Baylor Dent J
Baylor law review	Bayl Law Rev	0005-7274		Bayl Law Rev
The Beaver	Beaver	0005-7517		Beaver
Bedside nurse	Bedside Nurse	0005-7665		Bedside Nurse
Behavior therapy	Behav Ther	0005-7894	1878-1888	Behav Ther
Journal of behavior therapy and experimental psychiatry	J Behav Ther Exp Psychiatry	0005-7916	1873-7943	J Behav Ther Exp Psychiatry
Behavioral neuropsychiatry	Behav Neuropsychiatry	0005-7932		Behav Neuropsychiatry
Behavioral science	Behav Sci	0005-7940		Behav Sci
Behaviour	Behaviour	0005-7959		Behaviour
Behaviour research and therapy	Behav Res Ther	0005-7967	1873-622X	Behav Res Ther
Beitrage zur Entomologie / Deutches Entomologisches Institut	Beitr Entomol	0005-805X		Beitr Entomol
Beitrage zur Geschichte der Arbeiterbewegung : BZG	Beitr Gesch Arb	0005-8068		Beitr Gesch Arb
Beitrage zur Orthopadie und Traumatologie	Beitr Orthop Traumatol	0005-8149		Beitr Orthop Traumatol
Beitrage zur Pathologie	Beitr Pathol	0005-8165		Beitr Pathol
Belfagor	Belfagor	0005-8351		Belfagor
Bengal, past & present : journal of the Calcutta Historical Society	Bengal Past Present	0005-8807		Bengal Past Present
Berichte zur deutschen Landeskunde	Ber Dtsch Landeskd	0005-9099		Ber Dtsch Landeskd
Berichte zur Raumforschung und Raumplanung (Vienna, Austria)	Ber Raumforsch Raumplan	0005-9102		Ber Raumforsch Raumplan
Berliner und Munchener tierarztliche Wochenschrift	Berl Munch Tierarztl Wochenschr	0005-9366		Berl. Munch. Tierarztl. Wochenschr.
Berufs-Dermatosen	Berufsdermatosen	0005-9498		Berufsdermatosen
Best's review. Life-health insurance edition	Bests Rev Life Health Insur Ed	0005-9706		Bests Rev Life Health Insur Ed
Better homes and gardens	Better Homes Gard	0006-0151		Better Homes Gard
La Bibliofilia; rivista de storia del libro e delle arti grafiche di bibliografia ed erudizione	Bibliofilia	0006-0941		Bibliofilia
Papers. Bibliographical Society of America	Pap Bibliogr Soc Am	0006-128X		Pap Bibliogr Soc Am
Bibliography of reproduction; a classified monthly list of references compiled from the research literature, vertebrates including man	Bibliographr Reprod	0006-1565		Bibliographr Reprod
Boletin de la Biblioteca de Menendez Pelayo / Sociedad de Menendez Pelayo	Bol Bibl Menendez Pelayo	0006-1646		Bol Bibl Menendez Pelayo
Boletin Del Instituto De Investigaciones Bibliograficas	Bol Inst Invest Bibliogr (Mexico)	0006-1719		Bol Inst Invest Bibliogr (Mexico)
Revista de la Biblioteca Nacional Jose Marti. Biblioteca Nacional Jose Marti	Rev Bibl Nac Jose Marti	0006-1727		Rev Bibl Nac Jose Marti
Bibliotek for laeger	Bibl Laeger	0006-1786		Bibl Laeger
Biblioteksbladet	Biblioteksbladet	0006-1867		Biblioteksbladet
The bibliotheck	Bibliotheck	0006-193X		Bibliotheck
Bibliotheque d'humanisme et renaissance; travaux et documents	Bibl Humanisme Renaiss	0006-1999		Bibl Humanisme Renaiss
Bijdragen tijdschrift voor filosofie en theologie	Bijdragen	0006-2278		Bijdragen
Bijdragen tot de geschiedenis	Bijdr Geschied	0006-2286		Bijdr Geschied
Biken journal	Biken J	0006-2324		Biken J
Bild der Wissenschaft	Bild Wiss	0006-2375		Bild Wiss
Iranian journal of plant pathology		0006-2774		Iran. J. Plant Pathol.
Biomedical engineering	Biomed Eng	0006-2898		Biomed Eng
Biochemical and biophysical research communications	Biochem Biophys Res Commun	0006-291X	1090-2104	Biochem. Biophys. Res. Commun.
Biochemical genetics	Biochem Genet	0006-2928	1573-4927	Biochem. Genet.
Biochemical medicine	Biochem Med	0006-2944	1557-7996	Biochem Med
Biochemical pharmacology	Biochem Pharmacol	0006-2952	1873-2968	Biochem. Pharmacol.
Biochemistry	Biochemistry	0006-2960	1520-4995	Biochemistry
Biochemistry. Biokhimiia	Biochemistry (Mosc)	0006-2979	1608-3040	Biochemistry Mosc.
Biochimica et biophysica acta	Biochim Biophys Acta	0006-3002		Biochim. Biophys. Acta
Biodynamica	Biodynamica	0006-3010		Biodynamica
Biofizika	Biofizika	0006-3029		Biofizika
Bioinorganic chemistry	Bioinorg Chem	0006-3061		Bioinorg Chem
Biologia	Biologia (Bratisl)	0006-3088		Biologia
Biologia (Lahore, Pakistan)	Biologia	0006-3096		Biologia
Biology of the neonate	Biol Neonate	0006-3126	1421-9727	Biol. Neonate
Biologia plantarum		0006-3134		Biol. Plant.
Biologica Latina	Biol Lat	0006-3150		Biol Lat
The Biological bulletin	Biol Bull	0006-3185	1939-8697	Biol. Bull.
Biological conservation	Biol Conserv	0006-3207		Biol. Conserv.
Journal of the Biological Photographic Association	J Biol Photogr Assoc	0006-3215		J Biol Photogr Assoc
Biological psychiatry	Biol Psychiatry	0006-3223	1873-2402	Biol. Psychiatry
Proceedings. Biological Society of Washington		0006-324X		Proc. Biol. Soc. Wash.
Biologie et gastro-enterologie	Biol Gastroenterol (Paris)	0006-3258		Biol Gastroenterol (Paris)
Biologie medicale	Biol Med (Paris)	0006-3266		Biol Med (Paris)
Biologisches Zentralblatt	Biol Zent Bl	0006-3304		Biol Zent Bl
Biologist (Columbus, Ohio)	Biologist	0006-3339		Biologist
Biologist (London, England)	Biologist (London)	0006-3347		Biologist (London)
Biology and human affairs : a British Social Hygiene Council publication	Biol Hum Aff	0006-3355		Biol Hum Aff
Biology of reproduction	Biol Reprod	0006-3363	1529-7268	Biol. Reprod.
Biomedical engineering	Biomed Eng (NY)	0006-3398	1573-8256	Biomed Eng (NY)
Biomedical news; the newspaper for the life scientist	Biomed News	0006-3401		Biomed News
Biometrics	Biometrics	0006-341X	1541-0420	Biometrics
Revue de la Societe de biometrie humaine	Rev Soc Biom Hum	0006-3428		Rev Soc Biom Hum
Biometrika	Biometrika	0006-3444	1464-3510	Biometrika
Biometrische Zeitschrift	Biom Z	0006-3452		Biom Z
Biophysical journal	Biophys J	0006-3495	1542-0086	Biophys. J.
Biophysics	Biophysics (Oxf)	0006-3509		Biophysics (Oxf)
Biophysik	Biophysik	0006-3517		Biophysik
Biopolymers	Biopolymers	0006-3525	1097-0282	Biopolymers
Biorheology	Biorheology	0006-355X	1878-5034	Biorheology
Bioscience	Bioscience	0006-3568	1525-3244	Bioscience
Biotechnology and bioengineering	Biotechnol Bioeng	0006-3592	1097-0290	Biotechnol. Bioeng.
Biotropica	Biotropica	0006-3606	1744-7429	Biotropica
Bird study : the journal of the British Trust for Ornithology		0006-3657		Bird Study
Birthright	Birthright	0006-3789		Birthright
Biuletyn historii sztuki	Biul Hist Sztuki	0006-3967		Biul Hist Sztuki
Biuletyn Zydowskiego Instytutu Historycznego	Biul Zydowskiego Inst Hist Pol	0006-4033		Biul Zydowskiego Inst Hist Pol
The Black scholar	Black Scholar	0006-4246		Black Scholar
Blatter fur deutsche Landesgeschichte	Bl Dtsch Landesgesch	0006-4408		Bl Dtsch Landesgesch
Blatter fur deutsche und internationale Politik	Bl Dtsch Int Polit	0006-4416		Bl Dtsch Int Polit
Blatter fur Heimatkunde ...	BL Heimatkd	0006-4459		BL Heimatkd
Blake studies	Blake Stud	0006-4548		Blake Stud
Bleter far geshikhte	BL Gesz	0006-470X		BL Gesz
Blood	Blood	0006-4971	1528-0020	Blood
Blumea : tijdschrift voor de systematiek en de geografie der planten : a journal of plant taxonomy and plant geography		0006-5196		Blumea
Blut	Blut	0006-5242		Blut
Blutalkohol	Blutalkohol	0006-5250		Blutalkohol
[Boei eisei] Japanese Defense Forces medical journal	Boei Eisei	0006-5528		Boei Eisei
Bogens verden	Bogens Verden	0006-5692		Bogens Verden
Boletim geografico	Bol Geogr	0006-6028		Bol Geogr
Boletin de historia y antiguedades	Bol Hist Antig	0006-6303		Bol Hist Antig
Boletin de informacion dental	Bol Inf Dent (Madr)	0006-6311		Bol Inf Dent (Madr)
Bollettino chimico farmaceutico	Boll Chim Farm	0006-6648		Boll Chim Farm
Bollettino metallografico. Metallurgical bulletin	Boll Metallogr	0006-6826		Boll Metallogr
Bonner zoologische Beitrage : Herausgeber: Zoologisches Forschungsinstitut und Museum Alexander Koenig, Bonn		0006-7172		Bonn. Zool. Beitr.
The Book collector	Book Collect	0006-7237		Book Collect
Bordeaux chirurgical	Bord Chir	0006-7660		Bord Chir
Borden's review of nutrition research	Bordens Rev Nutr Res	0006-7679		Bordens Rev Nutr Res
Borgyogyaszati es venerologiaia szemle	Borgyogy Venerol Sz	0006-7768		Borgyogy Venerol Sz
Boston College industrial and commercial law review	Boston Coll Ind Commer Law Rev	0006-7954		Boston Coll Ind Commer Law Rev
Boston	Boston	0006-7989		Boston
Boston University journal	Boston Univ J	0006-8039		Boston Univ J
Boston University law review. Boston University. School of Law	Boston Univ Law Rev	0006-8047		Boston Univ Law Rev
Botanica marina		0006-8055		Botanica Marina
Botanical bulletin of Academia Sinica. New series. Zhong yang yan jiu yuan. Zhi wu yan jiu suo		0006-8063		Bot. Bull. Acad. Sinica (Taiwan)
Botanical gazette (Chicago, Ill.)	Bot Gaz	0006-8071		Bot Gaz
Botanical Museum leaflets, Harvard University	Bot Mus Lealf Harv Univ	0006-8098		Bot Mus Lealf Harv Univ
The Botanical review; interpreting botanical progress	Bot Rev	0006-8101		Bot. Rev.
Botanicheskii zhurnal		0006-8136		Bot. Z.
Botanische Jahrbucher fur Systematik, Pflanzengeschichte und Pflanzengeographie		0006-8152		Bot. Jahrb. Syst. Pflanzengesch. Pflanzengeogr.
Boundary-layer meteorology	Boundary Layer Meteorol	0006-8314	1573-1472	Boundary Layer Meteorol
Brain : a journal of neurology	Brain	0006-8950	1460-2156	Brain
No to shinkei = Brain and nerve	No To Shinkei	0006-8969		No To Shinkei
Brain, behavior and evolution	Brain Behav Evol	0006-8977	1421-9743	Brain Behav. Evol.
Brain research	Brain Res	0006-8993	1872-6240	Brain Res.
Brasil-medico	Bras Med	0006-9205		Bras Med
Bratislavske lekarske listy	Bratisl Lek Listy	0006-9248		Bratisl Lek Listy
Brethren life and thought	Brethr Life Thought	0006-9663		Brethr Life Thought
Breviora		0006-9698		Breviora
Briefs	Briefs	0007-0068		Briefs
Brigham Young University studies. Brigham Young University	Brigham Young Univ Stud	0007-0106		Brigham Young Univ Stud
Bristol medico-chirurgical journal (1883)	Bristol Med Chir J (1883)	0007-019X		Bristol Med Chir J (1883)
British birds; an illustrated magazine devoted to the birds on the British list		0007-0335		Br. Birds
British book news	Br Book News	0007-0343		Br Book News
British Columbia medical journal	B C Med J	0007-0556		B C Med J
British dental journal	Br Dent J	0007-0610	1476-5373	Br Dent J
The British dental surgery assistant	Br Dent Surg Assist	0007-0629		Br Dent Surg Assist
Journal of the British Endodontic Society	J Br Endod Soc	0007-0653		J Br Endod Soc
British heart journal	Br Heart J	0007-0769		Br Heart J
The British homoeopathic journal	Br Homeopath J	0007-0785		Br Homeopath J
Journal of the British Interplanetary Society	J Br Interplanet Soc	0007-084X		J Br Interplanet Soc
British journal for the history of science	Br J Hist Sci	0007-0874	1474-001X	Br J Hist Sci
The British journal for the philosophy of science	Br J Philos Sci	0007-0882	1464-3537	Br J Philos Sci
The British journal of addiction to alcohol and other drugs	Br J Addict Alcohol Other Drugs	0007-0890		Br J Addict Alcohol Other Drugs
British journal of anaesthesia	Br J Anaesth	0007-0912	1471-6771	Br J Anaesth
British journal of cancer	Br J Cancer	0007-0920	1532-1827	Br. J. Cancer
The British journal of clinical practice	Br J Clin Pract	0007-0947		Br J Clin Pract
The British journal of criminology	Br J Criminol	0007-0955	1464-3529	Br J Criminol
The British journal of dermatology	Br J Dermatol	0007-0963	1365-2133	Br. J. Dermatol.
British journal of diseases of the chest	Br J Dis Chest	0007-0971		Br J Dis Chest
The British journal of disorders of communication	Br J Disord Commun	0007-098X		Br J Disord Commun
The British journal of educational psychology	Br J Educ Psychol	0007-0998	2044-8279	Br J Educ Psychol
British journal of educational technology : journal of the Council for Educational Technology	Br J Educ Technol	0007-1013		Br J Educ Technol
British journal of experimental pathology	Br J Exp Pathol	0007-1021		Br J Exp Pathol
British journal of haematology	Br J Haematol	0007-1048	1365-2141	Br. J. Haematol.
British journal of hospital medicine	Br J Hosp Med	0007-1064		Br J Hosp Med
British journal of industrial medicine	Br J Ind Med	0007-1072		Br J Ind Med
The British journal of mathematical and statistical psychology	Br J Math Stat Psychol	0007-1102	2044-8317	Br J Math Stat Psychol
British journal of medical education	Br J Med Educ	0007-1110		Br J Med Educ
The British journal of medical psychology	Br J Med Psychol	0007-1129		Br J Med Psychol
The British journal of nutrition	Br J Nutr	0007-1145	1475-2662	Br. J. Nutr.
The British journal of ophthalmology	Br J Ophthalmol	0007-1161	1468-2079	Br J Ophthalmol
The British journal of oral surgery	Br J Oral Surg	0007-117X		Br J Oral Surg
British journal of pharmacology	Br J Pharmacol	0007-1188	1476-5381	Br. J. Pharmacol.
The British journal of physiological optics	Br J Physiol Opt	0007-1218		Br J Physiol Opt
British journal of plastic surgery	Br J Plast Surg	0007-1226		Br J Plast Surg
British journal of political science	Br J Polit Sci	0007-1234		Br J Polit Sci
British journal of preventive & social medicine	Br J Prev Soc Med	0007-1242		Br J Prev Soc Med
The British journal of psychiatry : the journal of mental science	Br J Psychiatry	0007-1250	1472-1465	Br J Psychiatry
British journal of psychology (London, England : 1953)	Br J Psychol	0007-1269		Br J Psychol
The British journal of radiology	Br J Radiol	0007-1285	1748-880X	Br J Radiol
The British journal of social and clinical psychology	Br J Soc Clin Psychol	0007-1293		Br J Soc Clin Psychol
The British journal of sociology	Br J Sociol	0007-1315	1468-4446	Br J Sociol
The British journal of surgery	Br J Surg	0007-1323	1365-2168	Br J Surg
British journal of urology	Br J Urol	0007-1331		Br J Urol
The British journal of venereal diseases	Br J Vener Dis	0007-134X		Br J Vener Dis
British medical bulletin	Br Med Bull	0007-1420	1471-8391	Br. Med. Bull.
British medical journal	Br Med J	0007-1447		Br Med J
Bulletin of the British Ornithologists' Club		0007-1595		Bull. Br. Ornithol. Club
British poultry science	Br Poult Sci	0007-1668	1466-1799	Br. Poult. Sci.
The British studies monitor	Br Stud Monit	0007-1846		Br Stud Monit
The British veterinary journal	Br Vet J	0007-1935		Br. Vet. J.
Brittonia		0007-196X	1938-436X	Brittonia
The Broadway	Broadway	0007-2133		Broadway
Les Bronches	Bronches	0007-2222		Bronches
Brookings bulletin (Washington, D.C. : 1962)	Brookings Bull	0007-229X		Brookings Bull
Brookings papers on economic activity	Brookings Pap Econ Act	0007-2303		Brookings Pap Econ Act
Brooklyn law review	Brooklyn Law Rev	0007-2362		Brooklyn Law Rev
Bruns' Beitrage fur klinische Chirurgie	Bruns Beitr Klin Chir	0007-2680		Bruns Beitr Klin Chir
The Bryologist	Bryologist	0007-2745		Bryologist
Building operating management	Build Oper Manage	0007-3490		Build Oper Manage
Spisanie na Bulgarskata akademiia na naukite. Bulgarska akademiia na naukite	Spis Blg Akad Nauk	0007-3989		Spis Blg Akad Nauk
Bulletin biologique de la France et de la Belgique	Bull Biol Fr Belg	0007-4187		Bull Biol Fr Belg
Bulletin de physio-pathologie respiratoire	Bull Physiopathol Respir (Nancy)	0007-439X		Bull Physiopathol Respir (Nancy)
Bulletin des infirmieres catholiques du Canada	Bull Infirm Cathol Can	0007-4470		Bull Infirm Cathol Can
Bulletin du cancer	Bull Cancer	0007-4551	1769-6917	Bull Cancer
Bulletin economique et social du Maroc	Bull Econ Soc Maroc	0007-4586		Bull Econ Soc Maroc
Bulletin historique et scientifique de l'Auvergne	Bull His Sci Auvergne	0007-4659		Bull His Sci Auvergne
American journal of art therapy	Am J Art Ther	0007-4764		Am J Art Ther
Bulletin of concerned Asian scholars	Bull Concern Asian Sch	0007-4810		Bull Concern Asian Sch
Bulletin of endemic diseases	Bull Endem Dis (Baghdad)	0007-4845		Bull Endem Dis (Baghdad)
Bulletin of entomological research	Bull Entomol Res	0007-4853	1475-2670	Bull. Entomol. Res.
Bulletin of environmental contamination and toxicology	Bull Environ Contam Toxicol	0007-4861	1432-0800	Bull Environ Contam Toxicol
Bulletin of epizootic diseases of Africa. Bulletin des epizooties en Afrique	Bull Epizoot Dis Afr	0007-487X		Bull Epizoot Dis Afr
Bulletin of experimental biology and medicine	Bull Exp Biol Med	0007-4888	1573-8221	Bull. Exp. Biol. Med.
Bulletin of Indonesian economic studies	Bull Indones Econ Stud	0007-4918		Bull Indones Econ Stud
Bulletin of marine science		0007-4977		Bull. Mar. Sci.
The Bulletin of mathematical biophysics	Bull Math Biophys	0007-4985		Bull Math Biophys
Laboratory medicine	Lab Med	0007-5027		Lab Med
Bulletin of peace proposals	Bull Peace Propos	0007-5035		Bull Peace Propos
Bulletin of prosthetics research	Bull Prosthet Res	0007-506X		Bull Prosthet Res
Jikken dobutsu. Experimental animals	Jikken Dobutsu	0007-5124		Jikken Dobutsu
Bulletin of the history of dentistry	Bull Hist Dent	0007-5132		Bull Hist Dent
Bulletin of the history of medicine	Bull Hist Med	0007-5140	1086-3176	Bull Hist Med
The Bulletin of zoological nomenclature	Bull Zool Nomencl	0007-5167		Bull Zool Nomencl
Bulletin on narcotics	Bull Narc	0007-523X		Bull Narc
Bulletin on the rheumatic diseases	Bull Rheum Dis	0007-5248		Bull Rheum Dis
Bullettino delle scienze mediche	Bull Sci Med (Bologna)	0007-5787		Bull Sci Med (Bologna)
Bundesgesundheitsblatt	Bundesgesundheitsblatt	0007-5914		Bundesgesundheitsblatt
The Bur	Bur	0007-6007		Bur
The Burlington magazine	Burlingt Mag	0007-6287		Burlingt Mag
Burma medical journal	Burma Med J	0007-6295		Burma Med J
Business and economic review (Columbia, S.C.)	Bus Econ Rev	0007-6465		Bus Econ Rev
Business and society	Bus Soc	0007-6503	1552-4205	Bus Soc
Business economics (Cleveland, Ohio)	Bus Econ	0007-666X		Bus Econ
Business history	Bus Hist	0007-6791		Bus Hist
Business history review	Bus Hist Rev	0007-6805		Bus Hist Rev
Business horizons	Bus Horiz	0007-6813		Bus Horiz
Business insurance	Bus Insur	0007-6864		Bus Insur
Business review (Federal Reserve Bank of Philadelphia)	Bus Rev	0007-7011		Bus Rev
Business week	Bus Week	0007-7135		Bus Week
Byzantinische Zeitschrift	Byzantinische Z	0007-7704		Byzantinische Z
Byzantinoslavica	Byzantinoslavica	0007-7712		Byzantinoslavica
Canadian review of American studies	Can Rev Am Stud	0007-7720		Can Rev Am Stud
CAL [magazine] Certified Akers Laboratories	CAL	0007-778X		CAL
CMD. Current medical dialog	Cmd	0007-862X		Cmd
CRC critical reviews in radiological sciences	CRC Crit Rev Radiol Sci	0007-9014		CRC Crit Rev Radiol Sci
CA: a cancer journal for clinicians	CA Cancer J Clin	0007-9235	1542-4863	CA Cancer J Clin
Cahiers africains d'administration publique = African administrative studies	Cah Afr Adm Publique	0007-9588		Cah Afr Adm Publique
Cahiers bruxellois	Cah Brux	0007-9626		Cah Brux
Cahiers d'anesthesiologie	Cah Anesthesiol	0007-9685		Cah Anesthesiol
Cahiers d'archeologie et d'histoire du Berry	Cah Archeol Hist Berry	0007-9693		Cah Archeol Hist Berry
Cahiers de biologie marine		0007-9723		Cah. Biol. Mar.
Cahiers de geographie du Quebec	Cah Geogr Que	0007-9766		Cah Geogr Que
Les Cahiers de l'Iroise	Cah Iroise	0007-9898		Cah Iroise
Cahiers de medecine interprofessionnelle	Cah Med Inter Prof	0007-9936	2117-5071	Cah Med Inter Prof
Les Cahiers de medecine veterinaire	Cah Med Vet	0007-9944		Cah Med Vet
Cahiers de sociologie et de demographie medicales	Cah Sociol Demogr Med	0007-9995		Cah Sociol Demogr Med
Les cahiers de Tunisie	Cah Tunis	0008-0012		Cah Tunis
Serie sciences de l'homme	Cah Am Lat Ser Sci Homme	0008-0020		Cah Am Lat Ser Sci Homme
Cahiers des religions africaines	Cah Relig Afr	0008-0047		Cah Relig Afr
Cahiers d'etudes africaines	Cah Etud Afr	0008-0055		Cah Etud Afr
Cahiers d'histoire	Cah Hist	0008-008X		Cah Hist
Caravelle (Toulouse, France)	Caravelle	0008-0152		Caravelle
Cahiers du monde russe et sovietique	Cah Monde Russe Sov	0008-0160		Cah Monde Russe Sov
Les cahiers du nursing	Cah Nurs	0008-0179		Cah Nurs
Cahiers economiques de Bruxelles	Cah Econ Brux	0008-0195		Cah Econ Brux
Cahiers economiques et sociaux	Cah Econ Soc	0008-0209		Cah Econ Soc
Cahiers geologiques	Cah Geol	0008-0241		Cah Geol
Les Cahiers haut-marnais	Cah Haut Marnais	0008-025X		Cah Haut Marnais
Cahiers Laennec	Cah Laennec	0008-0314		Cah Laennec
Cahiers medicaux lyonnais	Cah Med Lyon	0008-0357		Cah Med Lyon
Cahiers O. R. S. T. O. M. Serie sciences humaines	Cah Orstom (Sci Hum)	0008-0403		Cah Orstom (Sci Hum)
Calcified tissue research	Calcif Tissue Res	0008-0594		Calcif Tissue Res
Calcutta medical journal	Calcutta Med J	0008-0667		Calcutta Med J
Academy review of the California Academy of Periodontology, United States Section, ARPA Internationale	Acad Rev Calif Acad Periodontol	0008-0810		Acad Rev Calif Acad Periodontol
California agriculture	Calif Agric (Berkeley)	0008-0845	2160-8091	Calif Agric (Berkeley)
Journal - California Dental Association	J Calif Dent Assoc	0008-0977		J Calif Dent Assoc
California fish and game		0008-1078		Calif Fish Game
California journal	Calif J	0008-1205		Calif J
California law review	Calif Law Rev	0008-1221		Calif Law Rev
California management review	Calif Manage Rev	0008-1256		Calif Manage Rev
California medicine	Calif Med	0008-1264		Calif Med
California nurse	Calif Nurse	0008-1310		Calif Nurse
California Western law review	Calif West Law Rev	0008-1639		Calif West Law Rev
California's health	Calif Health	0008-168X		Calif Health
The Cambridge law journal	Camb Law J	0008-1973		Camb Law J
Canada's mental health	Can Ment Health	0008-2791		Can Ment Health
Canadian aeronautics and space journal. Le journal aeronautique et spatial du Canada	Can Aeronaut Space J	0008-2821		Can Aeronaut Space J
Canadian Anaesthetists' Society journal	Can Anaesth Soc J	0008-2856		Can Anaesth Soc J
Journal of the Canadian Association of Radiologists	J Can Assoc Radiol	0008-2902		J Can Assoc Radiol
Canadian bar journal	Can Bar J	0008-2996		Can Bar J
The Canadian bar review	Can Bar Rev	0008-3003		Can Bar Rev
The Journal of the Canadian Chiropractic Association	J Can Chiropr Assoc	0008-3194		J Can Chiropr Assoc
The Journal of the Canadian Church Historical Society	J Can Church Hist Soc	0008-3208		J Can Church Hist Soc
Journal of the Canadian Dental Association	J Can Dent Assoc (Tor)	0008-3372		J Can Dent Assoc (Tor)
The Canadian dental hygienist	Can Dent Hyg	0008-3380		Can Dent Hyg
Journal of the Canadian Dietetic Association	J Can Diet Assoc	0008-3399		J Can Diet Assoc
Canadian dimension	Can Dimens	0008-3402		Can Dimens
Canadian doctor	Can Doct	0008-3429		Can Doct
The Canadian entomologist	Can Entomol	0008-347X		Can. Entomol.
Canadian ethnic studies	Can Ethn Stud	0008-3496		Can Ethn Stud
Canadian family physician Medecin de famille canadien	Can Fam Physician	0008-350X	1715-5258	Can Fam Physician
The Canadian forum	Can Forum	0008-3631		Can Forum
The Canadian geographer. Geographe canadien	Can Geogr	0008-3658		Can Geogr
The Canadian historical review	Can Hist Rev	0008-3755		Can Hist Rev
Canadian hospital	Can Hosp	0008-3798		Can Hosp
Canadian journal of African studies	Can J Afr Stud	0008-3968		Can J Afr Stud
Canadian journal of animal science		0008-3984		Can. J. Anim. Sci.
Canadian journal of behavioural science. Revue canadienne des sciences du comportement	Can J Behav Sci	0008-400X		Can J Behav Sci
Canadian journal of biochemistry	Can J Biochem	0008-4018		Can. J. Biochem.
Canadian journal of botany. Journal canadien de botanique	Can J Bot	0008-4026	1480-3305	Can. J. Bot.
The Canadian journal of chemical engineering	Can J Chem Eng	0008-4034	1939-019X	Can J Chem Eng
Canadian journal of chemistry	Can J Chem	0008-4042	1480-3291	Can J Chem
Canadian journal of comparative medicine. Revue canadienne de medecine comparee	Can J Comp Med	0008-4050		Can. J. Comp. Med.
Canadian journal of earth sciences	Can J Earth Sci	0008-4077		Can J Earth Sci
The Canadian journal of economics. Revue canadienne d'economique	Can J Econ	0008-4085		Can J Econ
Canadian journal of genetics and cytology. Journal canadien de genetique et de cytologie	Can J Genet Cytol	0008-4093		Can. J. Genet. Cytol.
Canadian journal of history of sport and physical education	Can J Hist Sport Phys Educ	0008-4115		Can J Hist Sport Phys Educ
The Canadian journal of hospital pharmacy	Can J Hosp Pharm	0008-4123		Can J Hosp Pharm
Canadian journal of linguistics. La revue canadienne de linguistique	Can J Linguist	0008-4131	1710-1115	Can J Linguist
Canadian journal of medical technology	Can J Med Technol	0008-4158		Can J Med Technol
Canadian journal of microbiology	Can J Microbiol	0008-4166	1480-3275	Can. J. Microbiol.
Canadian journal of occupational therapy. Revue canadienne d'ergotherapie	Can J Occup Ther	0008-4174	1911-9828	Can J Occup Ther
Canadian journal of ophthalmology. Journal canadien d'ophtalmologie	Can J Ophthalmol	0008-4182		Can. J. Ophthalmol.
Canadian journal of physics	Can J Phys	0008-4204	1208-6045	Can J Phys
Canadian journal of physiology and pharmacology	Can J Physiol Pharmacol	0008-4212	1205-7541	Can. J. Physiol. Pharmacol.
Canadian journal of plant science. Revue canadienne de phytotechnie		0008-4220		Can. J. Plant Sci.
Canadian journal of political science. Revue canadienne de science politique	Can J Polit Sci	0008-4239		Can J Polit Sci
The Canadian journal of psychiatric nursing	Can J Psychiatr Nurs	0008-4247		Can J Psychiatr Nurs
Canadian journal of psychology	Can J Psychol	0008-4255		Can J Psychol
Canadian journal of public health = Revue canadienne de sante publique	Can J Public Health	0008-4263	1920-7476	Can J Public Health
Canadian journal of soil science		0008-4271	1918-1841	Can J Soil Sci
Canadian journal of surgery. Journal canadien de chirurgie	Can J Surg	0008-428X	1488-2310	Can J Surg
Studies in religion. Sciences religieuses	Stud Relig	0008-4298		Stud Relig
Canadian journal of zoology	Can J Zool	0008-4301	1480-3283	Can. J. Zool.
Canadian labour	Can Labour	0008-4336		Can Labour
Canadian Medical Association journal	Can Med Assoc J	0008-4409		Can Med Assoc J
The Canadian modern language review = La revue canadienne des langues vivantes	Can Mod Lang Rev	0008-4506	1710-1131	Can Mod Lang Rev
The Canadian nurse	Can Nurse	0008-4581		Can Nurse
Canadian Psychiatric Association journal	Can Psychiatr Assoc J	0008-4824		Can Psychiatr Assoc J
Canadian public administration : Administration publique du Canada	Can Public Adm	0008-4840	1754-7121	Can Public Adm
The Canadian review of sociology and anthropology. La Revue canadienne de sociologie et d'anthropologie	Can Rev Sociol Anthropol	0008-4948		Can Rev Sociol Anthropol
Canadian Slavonic papers	Can Slavon Pap	0008-5006		Can Slavon Pap
Canadian statistical review (Ottawa, Ont.)	Can Stat Rev	0008-509X		Can Stat Rev
The Canadian veterinary journal. La revue veterinaire canadienne	Can Vet J	0008-5286		Can. Vet. J.
CW, Canadian welfare	Can Welf	0008-5332		Can Welf
The Western Canadian journal of anthropology	West Can J Anthropol	0008-5340		West Can J Anthropol
Cancer	Cancer	0008-543X	1097-0142	Cancer
Cancer bulletin (Houston, Tex.)	Cancer Bull	0008-5448		Cancer Bull
Cancer news	Cancer News	0008-5464		Cancer News
Cancer research	Cancer Res	0008-5472	1538-7445	Cancer Res.
Il Cancro	Cancro	0008-5480		Cancro
Carbohydrate research	Carbohydr Res	0008-6215	1873-426X	Carbohydr. Res.
Carbon	Carbon N Y	0008-6223		Carbon N Y
Cardiology	Cardiology	0008-6312	1421-9751	Cardiology
Cardiologia pratica	Cardiol Prat	0008-6339		Cardiol Prat
Cardio-vascular nursing	Cardiovasc Nurs	0008-6355		Cardiovasc Nurs
Cardiovascular research	Cardiovasc Res	0008-6363	1755-3245	Cardiovasc. Res.
Cardiovascular Research Center bulletin	Cardiovasc Res Cent Bull	0008-6371		Cardiovasc Res Cent Bull
Caribbean journal of science		0008-6452		Caribb. J. Sci.
Caribbean quarterly	Caribb Q	0008-6495		Caribb Q
Caribbean review	Caribb Rev	0008-6525		Caribb Rev
Caribbean studies (Rio Piedras, San Juan, P.R.)	Caribb Stud	0008-6533		Caribb Stud
Caries research	Caries Res	0008-6568	1421-976X	Caries Res.
Carinthia I : Mittheilungen des Geschichtsvereins fur Karnten	Carinthia I	0008-6606		Carinthia I
The Cartographic journal	Cartogr J	0008-7041		Cartogr J
Case and comment	Case Comment	0008-7238		Case Comment
Case Western Reserve journal of international law	Case West Reserve J Int Law	0008-7254		Case West Reserve J Int Law
Case Western Reserve law review	Case West Reserve Law Rev	0008-7262		Case West Reserve Law Rev
Casopis lekaru ceskych	Cas Lek Cesk	0008-7335		Cas. Lek. Cesk.
Castanea		0008-7475		Castanea
The Catholic historical review	Cathol Hist Rev	0008-8080		Cathol Hist Rev
Catholic hospital	Cathol Hosp	0008-8099		Cathol Hosp
Medical service	Med Serv	0008-8102		Med Serv
The Catholic lawyer	Cathol Lawyer	0008-8137		Cathol Lawyer
The Catholic medical quarterly	Cathol Med Q	0008-8226		Cathol Med Q
The Catholic mind	Cathol Mind	0008-8242		Cathol Mind
The Catholic nurse	Cathol Nurse (Wallsend)	0008-8269		Cathol Nurse (Wallsend)
Catholic University law review	Cathol Univers Law Rev	0008-8390		Cathol Univers Law Rev
Catholic world	Cathol World	0008-848X		Cathol World
Cell and tissue kinetics	Cell Tissue Kinet	0008-8730		Cell Tissue Kinet
Cellular immunology	Cell Immunol	0008-8749	1090-2163	Cell. Immunol.
La Cellule	Cellule	0008-8757		Cellule
Centaurus; international magazine of the history of science and medicine	Centaurus	0008-8994		Centaurus
The Center magazine	Cent Mag	0008-9125		Cent Mag
The Central African journal of medicine	Cent Afr J Med	0008-9176		Cent Afr J Med
Central European history	Cent Eur Hist	0008-9389		Cent Eur Hist
Central states speech journal	Cent States Speech J	0008-9575		Cent States Speech J
Centre medical	Cent Med	0008-9826		Cent Med
Cereal chemistry	Cereal Chem	0009-0352		Cereal Chem
Ceres	Ceres	0009-0379		Ceres
Certified milk	Certif Milk	0009-0433		Certif Milk
Ceskoslovenska dermatologie	Cesk Dermatol	0009-0514		Cesk Dermatol
Ceskoslovenska epidemiologie, mikrobiologie, imunologie	Cesk Epidemiol Mikrobiol Imunol	0009-0522		Cesk Epidemiol Mikrobiol Imunol
Ceskoslovenska farmacie	Cesk Farm	0009-0530		Cesk Farm
Ceskoslovenska gastroenterologie a vyziva	Cesk Gastroenterol Vyz	0009-0565		Cesk Gastroenterol Vyz
Ceskoslovenska hygiena	Cesk Hyg	0009-0573		Cesk Hyg
Ceskoslovenska neurologie	Cesk Neurol	0009-0581		Cesk Neurol
Ceskoslovenska oftalmologie	Cesk Oftalmol	0009-059X		Cesk Oftalmol
Ceskoslovenska otolaryngologie	Cesk Otolaryngol	0009-0603		Cesk Otolaryngol
Ceskoslovenska psychologie	Cesk Psychol	0009-062X		Cesk Psychol
Ceskoslovenska stomatologie	Cesk Stomatol	0009-0654		Cesk Stomatol
Ceskoslovenske zdravotnictvi	Cesk Zdrav	0009-0689		Cesk Zdrav
The Ceylon medical journal	Ceylon Med J	0009-0875		Ceylon Med J
Change	Change	0009-1383	1939-9146	Change
Changing times	Changing Times	0009-143X		Changing Times
Channels	Channels	0009-1510		Channels
Chatelaine (Toronto, Ont. : 1928)	Chatelaine	0009-1995		Chatelaine
The Chaucer review	Chaucer Rev	0009-2002		Chaucer Rev
Chemia analityczna	Chem Analityczna	0009-2223		Chem Analityczna
Chemical and engineering news	Chem Eng News	0009-2347		Chem Eng News
Chemical & pharmaceutical bulletin	Chem Pharm Bull (Tokyo)	0009-2363	1347-5223	Chem. Pharm. Bull.
Chemical engineering science	Chem Eng Sci	0009-2509		Chem Eng Sci
Chemical geology	Chem Geol	0009-2541		Chem. Geol.
Chemical physics letters	Chem Phys Lett	0009-2614		Chem Phys Lett
Chemical reviews	Chem Rev	0009-2665	1520-6890	Chem. Rev.
Bulletin of the Chemical Society of Japan	Bull Chem Soc Jpn	0009-2673	1348-0634	Bull. Chem. Soc. Jpn.
Chemtech	Chemtech	0009-2703		Chemtech
Chemical week	Chem Week	0009-272X		Chem Week
Chemico-biological interactions	Chem Biol Interact	0009-2797	1872-7786	Chem. Biol. Interact.
Chemie der Erde : Beitrage zur chemischen Mineralogie, Petrographie und Geologie	Chem Erde	0009-2819		Chem. Erde
Chemisch weekblad	Chem Weekbl	0009-2932		Chem Weekbl
Chemische Berichte	Chem Ber	0009-2940		Chem. Ber.
The Chemist and druggist	Chem Drug	0009-3033		Chem Drug
Chemistry	Chemistry (Easton)	0009-305X		Chemistry (Easton)
Chemistry & industry	Chem Ind	0009-3068	2047-6329	Chem. Ind.
Chemistry and physics of lipids	Chem Phys Lipids	0009-3084	1873-2941	Chem. Phys. Lipids
Chemistry in Britain	Chem Br	0009-3106		Chem Br
Chemistry in Canada	Chem Can	0009-3114		Chem Can
Chemistry of heterocyclic compounds	Chem Heterocycl Compd (N Y)	0009-3122	1573-8353	Chem Heterocycl Compd (N Y)
Chemotherapy	Chemotherapy	0009-3157	1421-9794	Chemotherapy
The Chesopiean	Chesopiean	0009-3300		Chesopiean
Bulletin of the Chest Disease Research Institute, Kyoto University	Bull Chest Dis Res Inst Kyoto Univ	0009-3378		Bull Chest Dis Res Inst Kyoto Univ
Chiba Igakkai zasshi. The Journal of Chiba Medical Society	J Chiba Med Soc	0009-3459		J Chiba Med Soc
Chicago bar record	Chicago Bar Rec	0009-3505		Chicago Bar Rec
The Fortnightly review of the Chicago Dental Society	Fortn Rev Chic Dent Soc	0009-353X		Fortn Rev Chic Dent Soc
Chicago-Kent law review	Chic Kent Law Rev	0009-3599		Chic Kent Law Rev
The Chicago Medical School quarterly	Chic Med Sch Q	0009-3629		Chic Med Sch Q
Chicago medicine	Chic Med	0009-3637		Chic Med
Chicago studies	Chic Stud	0009-3718		Chic Stud
Child and family	Child Fam	0009-3882		Child Fam
Child development	Child Dev	0009-3920	1467-8624	Child Dev
Child psychiatry and human development	Child Psychiatry Hum Dev	0009-398X	1573-3327	Child Psychiatry Hum Dev
Child psychiatry quarterly	Child Psychiatry Q	0009-3998		Child Psychiatry Q
Child welfare	Child Welfare	0009-4021		Child Welfare
Childhood education	Child Educ	0009-4056	2162-0725	Child Educ
Children	Children	0009-4064		Children
Clinical proceedings - Children's Hospital of the District of Columbia	Clin Proc Child Hosp Dist Columbia	0009-4129		Clin Proc Child Hosp Dist Columbia
Chimia	Chimia (Aarau)	0009-4293		Chimia (Aarau)
Chimica therapeutica	Chim Ther	0009-4374		Chim Ther
China reconstructs	China Reconstr	0009-4447		China Reconstr
China report (New Delhi, India)	China Rep	0009-4455		China Rep
Chinese culture	Chin Cult	0009-4544		Chin Cult
Chinese economic studies	Chin Econ Stud	0009-4552		Chin Econ Stud
Zhonghua Minguo wei sheng wu xue za zhi = Chinese journal of microbiology	Zhonghua Min Guo Wei Sheng Wu Xue Za Zhi	0009-4587		Zhonghua Min Guo Wei Sheng Wu Xue Za Zhi
Chinese sociology and anthropology	Chin Sociol Anthropol	0009-4625		Chin Sociol Anthropol
Chiropodist (Society of Chiropodists)	Chiropodist (Lond)	0009-4706		Chiropodist (Lond)
Der Chirurg; Zeitschrift fur alle Gebiete der operativen Medizen	Chirurg	0009-4722	1433-0385	Chirurg
Chirurgia	Chirurgia (Bucur)	0009-4730		Chirurgia (Bucur)
La Chirurgia degli organi di movimento	Chir Organi Mov	0009-4749	1973-2538	Chir Organi Mov
Chirurgia e patologia sperimentale	Chir Patol Sper	0009-4757		Chir Patol Sper
Chirurgia italiana	Chir Ital	0009-4773		Chir Ital
Chirurgia maxillofacialis & plastica	Chir Maxillofac Plast	0009-4781		Chir Maxillofac Plast
Chirurgia narzadow ruchu i ortopedia polska	Chir Narzadow Ruchu Ortop Pol	0009-479X		Chir Narzadow Ruchu Ortop Pol
Le Chirurgien-dentiste de France	Chir Dent Fr	0009-4838		Chir Dent Fr
Chitty's law journal	Chittys Law J	0009-4889		Chittys Law J
Choice (Chicago, Ill.)	Choice (Middletown)	0009-4978		Choice (Middletown)
Christian century (Chicago, Ill. : 1902)	Christ Century	0009-5281		Christ Century
The Journal of the Christian Medical Association of India	J Christ Med Assoc India	0009-5443		J Christ Med Assoc India
Christian Medical Society journal	Christ Med Soc J	0009-546X		Christ Med Soc J
Christian nurse	Christ Nurse (Mysore)	0009-5540		Christ Nurse (Mysore)
Christianity and crisis	Christ Crisis	0009-5745		Christ Crisis
Christianity today	Christ Today	0009-5753		Christ Today
Chromatographia	Chromatographia	0009-5893		Chromatographia
Chromatographic reviews	Chromatogr Rev	0009-5907	1878-1438	Chromatogr Rev
Chromosoma	Chromosoma	0009-5915	1432-0886	Chromosoma
The Chronicle of higher education	Chron High Educ	0009-5982		Chron High Educ
Chronicles of Oklahoma	Chron Okla	0009-6024		Chron Okla
Chronique d'Egypte; bulletin periodique de la Fondation egyptologique reine Elisabeth	Chron Egypte	0009-6067		Chron Egypte
Church history	Church Hist	0009-6407		Church Hist
Ciel et terre	Ciel Terre	0009-6709		Ciel Terre
Ciencia e cultura	Cienc Cult	0009-6725		Cienc Cult
Ciencia e investigacion	Cienc Invest	0009-6733		Cienc Invest
Cincinnati journal of medicine	Cinci J Med	0009-6873		Cinci J Med
University of Cincinnati law review. University of Cincinnati. College of Law	Univ Cincinnati Law Rev	0009-6881		Univ Cincinnati Law Rev
Circular farmaceutica	Circ Farm	0009-7314		Circ Farm
Circulation	Circulation	0009-7322	1524-4539	Circulation
Circulation research	Circ Res	0009-7330	1524-4571	Circ. Res.
Revista. Circulo Odontologico de Rosario	Rev Circul Ondontol Ros	0009-7357		Rev Circul Ondontol Ros
Cirugia espanola	Cir Esp	0009-739X	1578-147X	Cir Esp
Cirugia y cirujanos	Cir Cir	0009-7411		Cir Cir
Civil War history	Civ War Hist	0009-8078		Civ War Hist
Civil War times illustrated	Civ War Times Illus	0009-8094		Civ War Times Illus
Civilisations	Civilisations	0009-8140		Civilisations
La Civilta cattolica	Civ Cattol	0009-8167		Civ Cattol
The classical journal	Class J	0009-8353		Class J
The Classical outlook	Class Outlook	0009-8361		Class Outlook
Classical philology	Class Philol	0009-837X		Class Philol
Classical quarterly	Class Q	0009-8388		Class Q
The Classical review	Classical Rev	0009-840X		Classical Rev
Classical world	Class World	0009-8418		Class World
Clay minerals	Clay Miner	0009-8558		Clay Miner
Clays and clay minerals	Clays Clay Miner	0009-8604		Clays Clay Miner
Clearing house (Menasha, Wis.)	Clearing House	0009-8655		Clearing House
Clearinghouse review	Clgh Rev	0009-868X		Clgh Rev
The Cleft palate journal	Cleft Palate J	0009-8701		Cleft Palate J
The Clergy review	Clergy Rev	0009-8736		Clergy Rev
Cleveland Clinic quarterly	Cleve Clin Q	0009-8787		Cleve Clin Q
The Bulletin of the Cleveland Dental Society	Bull Cleve Dent Soc	0009-8795		Bull Cleve Dent Soc
The bulletin of the Cleveland Medical Library. Cleveland Medical Library Association	Bull Clevel Med Libr	0009-8833		Bull Clevel Med Libr
Clinica chimica acta; international journal of clinical chemistry	Clin Chim Acta	0009-8981	1873-3492	Clin. Chim. Acta
Clinica europea	Clin Eur	0009-9007		Clin Eur
La Clinica ortopedica	Clin Ortop	0009-9023		Clin Ortop
La Clinica otorinolaringoiatrica	Clin Otorinolaringoiatr	0009-904X		Clin Otorinolaringoiatr
La Clinica pediatrica	Clin Pediatr (Bologna)	0009-9058		Clin Pediatr (Bologna)
La Clinica terapeutica	Clin Ter	0009-9074	1972-6007	Clin Ter
La Clinica veterinaria	Clin Vet (Milano)	0009-9082		Clin Vet (Milano)
Clinical allergy	Clin Allergy	0009-9090		Clin. Allergy
Clinical and experimental immunology	Clin Exp Immunol	0009-9104	1365-2249	Clin. Exp. Immunol.
Clinical anesthesia	Clin Anesth	0009-9112		Clin Anesth
Clinical biochemistry	Clin Biochem	0009-9120	1873-2933	Clin. Biochem.
Clinical chemistry	Clin Chem	0009-9147	1530-8561	Clin. Chem.
Clinical EEG (electroencephalography)	Clin Electroencephalogr	0009-9155		Clin Electroencephalogr
Clinical genetics	Clin Genet	0009-9163	1399-0004	Clin. Genet.
Rinsho shinkeigaku = Clinical neurology	Rinsho Shinkeigaku	0009-918X	1882-0654	Rinsho Shinkeigaku
Clinical notes on respiratory diseases	Clin Notes Respir Dis	0009-9198		Clin Notes Respir Dis
Clinical obstetrics and gynecology	Clin Obstet Gynecol	0009-9201	1532-5520	Clin Obstet Gynecol
Clinical orthopaedics and related research	Clin Orthop Relat Res	0009-921X	1528-1132	Clin. Orthop. Relat. Res.
Clinical pediatrics	Clin Pediatr (Phila)	0009-9228	1938-2707	Clin Pediatr (Phila)
Clinical pharmacology and therapeutics	Clin Pharmacol Ther	0009-9236	1532-6535	Clin. Pharmacol. Ther.
The Clinical psychologist	Clin Psychol	0009-9244		Clin Psychol
Rinsho hoshasen. Clinical radiography	Rinsho Hoshasen	0009-9252		Rinsho Hoshasen
Clinical radiology	Clin Radiol	0009-9260	1365-229X	Clin Radiol
Clinical research	Clin Res	0009-9279		Clin Res
Clinical science	Clin Sci	0009-9287		Clin Sci
Clinical symposia (Summit, N.J. : 1957)	Clin Symp	0009-9295		Clin Symp
Clinical toxicology	Clin Toxicol	0009-9309		Clin. Toxicol.
Clinical trials journal	Clin Trials J	0009-9325		Clin Trials J
The Clinician	Clinician (Goa)	0009-9341		Clinician (Goa)
Clinique (Paris, France)	Clinique (Paris)	0009-935X		Clinique (Paris)
Coeur; revue de cardiologie medico-chirurgicale	Coeur	0010-0226		Coeur
Coeur et medecine interne	Coeur Med Interne	0010-0234		Coeur Med Interne
Cognition	Cognition	0010-0277	1873-7838	Cognition
Cognitive psychology	Cogn Psychol	0010-0285	1095-5623	Cogn Psychol
Coimbra medica	Coimbra Med	0010-0366		Coimbra Med
Coin world	Coin World	0010-0447		Coin World
The Colby Library quarterly	Colby Libr Q	0010-0552		Colby Libr Q
Archivos del Colegio Medico de El Salvador	Arch Col Med El Salv	0010-0641		Arch Col Med El Salv
The Coleopterists' bulletin		0010-065X		Coleopt. Bull.
Collectanea botanica	Collect Bot	0010-0730	1989-1067	Collect Bot
Collection of Czechoslovak chemical communications	Collect Czechoslov Chem Commun	0010-0765	1212-6950	Collect. Czech. Chem. Commun.
College and research libraries	Coll Res Libr	0010-0870		Coll Res Libr
Les Cahiers de medecine	Cah Med	0010-0978		Cah Med
Transactions & studies of the College of Physicians of Philadelphia	Trans Stud Coll Physicians Phila	0010-1087		Trans Stud Coll Physicians Phila
Boletin mensual de estadisticas (Colombia. Departamento Administrativo Nacional de Estadisticas)	Bol Mens Estad DANE	0010-1370		Bol Mens Estad DANE
Journal of the Colorado Dental Association	J Colo Dent Assoc	0010-1559		J Colo Dent Assoc
The Colorado magazine	Colo Mag	0010-1648		Colo Mag
Colorado nurse	Colo Nurse	0010-1680		Colo Nurse
Colorado quarterly	Colo Q	0010-1710		Colo Q
Columbia forum	Columbia Forum	0010-1907		Columbia Forum
Columbia journal of law and social problems	Columbia J Law Soc Probl	0010-1923		Columbia J Law Soc Probl
Columbia journalism review	Columbia J Rev	0010-194X		Columbia J Rev
Columbia law review	Columbia Law Rev	0010-1958		Columbia Law Rev
Combustion and flame	Combust Flame	0010-2180	1556-2921	Combust Flame
Commentary (New York, N.Y.)	Commentary	0010-2601		Commentary
Commercial law journal	Commer Law J	0010-3055		Commer Law J
Commonweal (New York, N.Y.)	Commonweal	0010-3330		Commonweal
Orvostorteneti kozlemenyek	Orvostort Kozl	0010-3551		Orvostort Kozl
Communications in behavioral biology. Part A: [Original articles]	Commun Behav Biol	0010-3608		Commun Behav Biol
Communications in soil science and plant analysis	Commun Soil Sci Plant Anal	0010-3624		Commun Soil Sci Plant Anal
Communications on pure and applied mathematics	Commun Pure Appl Math	0010-3640	1097-0312	Commun Pure Appl Math
Community development journal	Community Dev J	0010-3802		Community Dev J
Journal of the Community Development Society	J Community Dev Soc	0010-3829		J Community Dev Soc
Community health	Community Health (Bristol)	0010-3837		Community Health (Bristol)
Community mental health journal	Community Ment Health J	0010-3853	1573-2789	Community Ment Health J
Comparative and general pharmacology	Comp Gen Pharmacol	0010-4035		Comp Gen Pharmacol
The Comparative and international law journal of southern Africa = Tydskrif vir regsvergelyking en internasionale reg van Suidelik Afrika = Jornal de direito comparativo e internacional para os paises do sul da Africa = Journal de droit...	Comp Int Law J South Afr	0010-4051		Comp Int Law J South Afr
Comparative biochemistry and physiology	Comp Biochem Physiol	0010-406X		Comp. Biochem. Physiol.
Comparative education review	Comp Educ Rev	0010-4086		Comp Educ Rev
Comparative political studies	Comp Polit Stud	0010-4140		Comp Polit Stud
Comparative politics	Comp Polit	0010-4159		Comp Polit
Comparative studies in society and history	Comp Stud Soc Hist	0010-4175		Comp Stud Soc Hist
Compensation review	Compens Rev	0010-4248		Compens Rev
Comprehensive psychiatry	Compr Psychiatry	0010-440X	1532-8384	Compr Psychiatry
Computer aided design	Comput Aided Des	0010-4485		Comput Aided Des
Computer physics communications	Comput Phys Commun	0010-4655		Comput Phys Commun
Computer programs in biomedicine	Comput Programs Biomed	0010-468X		Comput Programs Biomed
Computers and biomedical research, an international journal	Comput Biomed Res	0010-4809	1090-2368	Comput. Biomed. Res.
Computers and the humanities	Comput Hum	0010-4817		Comput Hum
Computers in biology and medicine	Comput Biol Med	0010-4825	1879-0534	Comput. Biol. Med.
Computerworld	Computerworld	0010-4841		Computerworld
Combustion, explosion, and shock waves	Combust Explos Shock Waves	0010-5082	1573-8345	Combust Explos Shock Waves
Concordia Historical Institute quarterly. Concordia Historical Institute	Concordia Hist Inst Q	0010-5260		Concordia Hist Inst Q
Concours medical	Concours Med	0010-5309		Concours Med
Conditional reflex	Cond Reflex	0010-5392		Cond Reflex
The Condor	Condor	0010-5422	1938-5129	Condor
The Conference Board record	Conf Board Rec	0010-5546		Conf Board Rec
Confinia neurologica	Confin Neurol	0010-5678		Confin Neurol
Confinia psychiatrica. Borderland of psychiatry. Grenzgebiete der Psychiatrie. Les Confins de la psychiatrie	Confin Psychiatr	0010-5686		Confin Psychiatr
Congressional quarterly weekly report	Congr Q Wkly Rep	0010-5910		Congr Q Wkly Rep
Connecticut health bulletin	Conn Health Bull	0010-6127		Conn Health Bull
Connecticut law review	Conn Law Rev	0010-6151		Conn Law Rev
Connecticut medicine	Conn Med	0010-6178		Conn Med
Journal - Connecticut State Dental Association	J Conn State Dent Assoc	0010-6232		J Conn State Dent Assoc
Conservative Judaism	Conserv Jud	0010-6542		Conserv Jud
Consommation, revue de socio-economie	Consommation	0010-6593		Consommation
Consultant	Consultant	0010-7069		Consultant
Consumer reports	Consum Rep	0010-7174		Consum Rep
Contact point	Contact Point	0010-7301		Contact Point
Contamination control	Contam Control	0010-7395		Contam Control
Contemporary physics	Contemp Phys	0010-7514	1366-5812	Contemp Phys
Contemporary psychoanalysis	Contemp Psychoanal	0010-7530		Contemp Psychoanal
Contemporary review (London, England)	Contemp Rev	0010-7565		Contemp Rev
Contraception	Contraception	0010-7824	1879-0518	Contraception
Contract (New York, N.Y. : 1960)	Contract	0010-7832		Contract
Contrepoint	Contrepoint	0010-7964		Contrepoint
Contributions to mineralogy and petrology. Beitrage zur Mineralogie und Petrologie	Contrib Mineral Petrol	0010-7999		Contrib Mineral Petrol
Cooperation and conflict	Coop Confl	0010-8367		Coop Confl
Coordination chemistry reviews	Coord Chem Rev	0010-8545		Coord Chem Rev
Cor et vasa	Cor Vasa	0010-8650		Cor Vasa
The Cornell hotel and restaurant administration quarterly	Cornell Hotel Restaur Adm Q	0010-8804		Cornell Hotel Restaur Adm Q
Cornell international law journal	Cornell Int Law J	0010-8812		Cornell Int Law J
The Cornell journal of social relations	Cornell J Soc Relat	0010-8820		Cornell J Soc Relat
Cornell law review	Cornell Law Rev	0010-8847		Cornell Law Rev
The Cornell veterinarian	Cornell Vet	0010-8901		Cornell Vet
Il Corriere dei farmacisti	Corr Farm	0010-9207		Corr Farm
Corrosion science		0010-938X	1879-0496	Corros Sci
Cortex; a journal devoted to the study of the nervous system and behavior	Cortex	0010-9452	1973-8102	Cortex
The Counseling psychologist	Couns Psychol	0011-0000		Couns Psychol
Bulletin trimestriel - Credit communal de Belgique	Bull Trimest Credit Communal Belg	0011-099X		Bull Trimest Credit Communal Belg
Creighton law review	Creighton Law Rev	0011-1155		Creighton Law Rev
Crime and delinquency	Crime Delinq	0011-1287		Crime Delinq
Criminal law bulletin	Crim Law Bull	0011-1317		Crim Law Bull
Criminal law review (London, England)	Crim Law Rev	0011-135X		Crim Law Rev
Criminalia	Crim	0011-1368		Crim
Criminology; an interdisciplinary journal	Criminology	0011-1384		Criminology
Christ to the world	Christ World	0011-1465		Christ World
Critica; revista hispanoamericana de filosofia	Critica	0011-1503		Critica
La Critica sociologica	Crit Sociol	0011-1546		Crit Sociol
Critica storica	Crit Stor	0011-1554		Crit Stor
Croatica chemica acta. Arhiv za kemiju	Croat Chem Acta	0011-1643		Croat Chem Acta
La Cronica medica	Cron Med	0011-1805		Cron Med
Crop science	Crop Sci	0011-183X		Crop Sci.
Nihon Sakumotsu Gakkai kiji	Jpn J Crop Sci	0011-1848		Jpn J Crop Sci
Cross currents	Cross Curr	0011-1953		Cross Curr
Crucible	Crucible	0011-2100		Crucible
Crustaceana		0011-216X		Crustaceana
Crux	Crux	0011-2186		Crux
Cryobiology	Cryobiology	0011-2240	1090-2392	Cryobiology
Cryogenics	Cryogenics (Guildf)	0011-2275	1879-2235	Cryogenics (Guildf)
Cuadernos americanos	Cuad Am	0011-2356		Cuad Am
Cuadernos hispanoamericanos	Cuad Hispanoam	0011-250X		Cuad Hispanoam
Cultura e scuola	Cult Sc	0011-2771		Cult Sc
Cultures et developpement / Universite catholique de Louvain	Cult Dev	0011-295X		Cult Dev
Current	Current	0011-3131		Current
Current affairs bulletin	Curr Aff Bull	0011-3182		Curr Aff Bull
Current anthropology	Curr Anthropol	0011-3204	1537-5382	Curr. Anthropol.
The Current digest of the Soviet press	Curr Dig Sov Press	0011-3425		Curr Dig Sov Press
Current history (New York, N.Y. : 1941)	Curr Hist	0011-3530		Curr Hist
Current medical practice	Curr Med Pract	0011-3700		Curr Med Pract
Current medicine for attorneys	Curr Med Atty	0011-3719		Curr Med Atty
Current problems in surgery	Curr Probl Surg	0011-3840	1535-6337	Curr Probl Surg
Current science	Curr Sci	0011-3891		Curr. Sci.
Current sociology. La Sociologie contemporaine	Curr Sociol	0011-3921		Curr Sociol
Current therapeutic research, clinical and experimental	Curr Ther Res Clin Exp	0011-393X		Curr Ther Res Clin Exp
Current topics in radiation research quarterly	Curr Top Radiat Res Q	0011-3964		Curr Top Radiat Res Q
Currents in modern biology	Curr Mod Biol	0011-4014		Curr Mod Biol
Cutis	Cutis	0011-4162	2326-6929	Cutis
Cylchgrawn Llyfrgell Genedlaethol Cymru. The National Library of Wales journal. National Library of Wales	Cylchgrawn Llyfrgell Genedlaethol Cymru	0011-4421		Cylchgrawn Llyfrgell Genedlaethol Cymru
Cytobios	Cytobios	0011-4529		Cytobios
Cytogenetics	Cytogenetics	0011-4537		Cytogenetics
Cytologia	Cytologia (Tokyo)	0011-4545	1348-7019	Cytologia (Tokyo)
Czasopismo stomatologiczne	Czas Stomatol	0011-4553		Czas Stomatol
Disease-a-month : DM	Dis Mon	0011-5029	1557-8194	Dis Mon
Daedalus	Daedalus	0011-5266		Daedalus
The Dalhousie review	Dalhousie Rev	0011-5827		Dalhousie Rev
The Dallas medical journal	Dallas Med J	0011-586X		Dallas Med J
Danmarks amtsrad	Dan Amtsrad	0011-6106		Dan Amtsrad
Dansk tidsskrift for farmaci	Dan Tidsskr Farm	0011-6513		Dan Tidsskr Farm
Darwiniana		0011-6793		Darwiniana
Daughters of the American Revolution magazine	DAR Mag	0011-7013		DAR Mag
De Paul law review	De Paul Law Rev	0011-7188		De Paul Law Rev
The Deccan geographer	Deccan Geogr	0011-7269		Deccan Geogr
Defence science journal	Def Sci J	0011-748X		Def Sci J
Defense law journal	Def Law J	0011-7587		Def Law J
Delaware history	Del Hist	0011-7765		Del Hist
Delaware medical journal	Del Med J	0011-7781		Del Med J
Demografia	Demografia	0011-8249		Demografia
Demografie	Demografie	0011-8265		Demografie
Demosta	Demosta	0011-8338		Demosta
Dens sapiens	Dens Sapiens	0011-8443		Dens Sapiens
Dental abstracts; a selection of world dental literature	Dent Abstr	0011-8486		Dent Abstr
The Dental assistant	Dent Assist	0011-8508		Dent Assist
The Journal of the Dental Association of South Africa = Die Tydskrif van die Tandheelkundige Vereniging van Suid-Afrika	J Dent Assoc S Afr	0011-8516		J. Dent. Assoc. S. Afr.
Dental Cadmos	Dent Cadmos	0011-8524		Dent Cadmos
Dental clinics of North America	Dent Clin North Am	0011-8532	1558-0512	Dent. Clin. North Am.
Dental concepts	Dent Concepts	0011-8540		Dent Concepts
Dental Dienst; Fachzeitschrift fur den Dental-Markt; technisches Fachblatt fur Prothetik	Dent Dienst	0011-8559		Dent Dienst
Dental digest	Dent Dig	0011-8567		Dent Dig
Dental echo	Dent Echo (Heidelb)	0011-8575		Dent Echo (Heidelb)
Dental economics - oral hygiene	Dent Econ	0011-8583		Dent Econ
Bulletin of the Dental Guidance Council for Cerebral Palsy	Bull Dent Guid Counc Cereb Palsy	0011-8591		Bull Dent Guid Counc Cereb Palsy
Dental health	Dent Health (London)	0011-8605		Dent Health (London)
Official publication. Dental Hygienists' Association of the State of New York	Off Publ Dent Hyg Assoc State N Y	0011-8621		Off Publ Dent Hyg Assoc State N Y
The Dental journal of Malaysia & Singapore	Dent J Malaysia Singapore	0011-8648		Dent J Malaysia Singapore
Das Dental-Labor. Le Laboratoire dentaire. The Dental laboratory	Dent Labor (Munch)	0011-8656		Dent Labor (Munch)
Dental laboratory review	Dent Lab Rev	0011-8672		Dent Lab Rev
Dental management	Dent Manage	0011-8680		Dent Manage
Dental Mirror	Dent Mirror (Quezon City)	0011-8699		Dent Mirror (Quezon City)
Dental practice	Dent Pract	0011-8710		Dent Pract
The Dental practitioner and dental record	Dent Pract Dent Rec	0011-8729		Dent Pract Dent Rec
Dental student	Dent Stud	0011-877X		Dent Stud
Dental survey	Dent Surv	0011-8788		Dent Surv
The Dental technician	Dent Tech	0011-8796		Dent Tech
Denver law journal	Denver Law J	0011-8834		Denver Law J
Dermato-venerologie	Dermatovenerologia	0011-9024		Dermatovenerologia
Dermatologia ibero latino-americana	Dermatol Iber Lat Am	0011-9040		Dermatol Iber Lat Am
International journal of dermatology	Int J Dermatol	0011-9059	1365-4632	Int. J. Dermatol.
Dermatologica	Dermatologica	0011-9075		Dermatologica
Dermatologische Monatschrift	Dermatol Monatsschr	0011-9083		Dermatol Monatsschr
Desmos	Desmos	0011-9474		Desmos
Detroit dental bulletin	Detroit Dent Bull	0011-9601		Detroit Dent Bull
Deutsche Apotheker-Zeitung	Dtsch Apoth Ztg	0011-9857		Dtsch Apoth Ztg
Deutsche Aussenpolitik	Dtsch Aussenpolit	0011-9881		Dtsch Aussenpolit
Berichte der Deutschen Botanischen Gesellschaft	Ber Dtsch Bot Ges	0011-9970		Ber Dtsch Bot Ges
Deutsche Drogistenzeitung	Dtsch Drog Ztg	0012-0049		Dtsch Drog Ztg
Das Deutsche Gesundheitswesen	Dtsch Gesundheitsw	0012-0219		Dtsch Gesundheitsw
Deutsche Lebensmittel-Rundschau : Zeitschrift fur Lebensmittelkunde und Lebensmittelrecht	Dtsch Lebensmitt Rundsch	0012-0413		Dtsch Lebensmitt Rundsch
Deutsche medizinische Wochenschrift (1946)	Dtsch Med Wochenschr	0012-0472	1439-4413	Dtsch. Med. Wochenschr.
Mitteilungen. Deutsche Pharmazeutische Gesellschaft	Mitt Dtsch Pharm Ges Pharm Ges DDR	0012-0561		Mitt Dtsch Pharm Ges Pharm Ges DDR
Deutsche Rentenversicherung	Dtsch Rentenversicher	0012-0618		Dtsch Rentenversicher
Deutsche Krankenpflegezeitschrift	Dtsch Krankenpflegez	0012-074X		Dtsch Krankenpflegez
Deutsche Stomatologie	Dtsch Stomatol	0012-0790		Dtsch Stomatol
Deutsche tierarztliche Wochenschrift	Dtsch Tierarztl Wochenschr	0012-0847		Dtsch Tierarztl Wochenschr
Deutsche Vierteljahrsschrift fur Literaturwissenschaft und Geistesgeschichte	Dtsch Vierteljahresschr Litt Wiss Geistesgesch	0012-0936		Dtsch Vierteljahresschr Litt Wiss Geistesgesch
Deutsche Zahn-, Mund-, und Kieferheilkunde mit Zentralblatt fur die gesamte Zahn-, Mund-, und Kieferheilkunde	Dtsch Zahn Mund Kieferheilkd Zentralbl Gesamte	0012-1010		Dtsch Zahn Mund Kieferheilkd Zentralbl Gesamte
Deutsche zahnarztliche Zeitschrift	Dtsch Zahnarztl Z	0012-1029		Dtsch Zahnarztl Z
Zeitschrift fur Neurologie	Z Neurol	0012-1037		Z Neurol
Deutsche Zeitschrift fur Philosophie	Dtsch Z Philos	0012-1045		Dtsch Z Philos
Deutsche Zeitschrift fur Verdauungs- und Stoffwechselkrankheiten	Dtsch Z Verdau Stoffwechselkr	0012-1053		Dtsch Z Verdau Stoffwechselkr
Deutsches Jahrbuch fur Volkskunde	Dtsch Jahrb Volkskd	0012-1312		Dtsch Jahrb Volkskd
Deutsches medizinisches Journal	Dtsch Med J	0012-1320		Dtsch Med J
Abhandlungen und Berichte (Deutsches Museum (Germany))	Abh Ber Dtsch Mus	0012-1339		Abh Ber Dtsch Mus
Deutschland Archiv	Dtschl Arch	0012-1428		Dtschl Arch
The Developing economies	Dev Econ	0012-1533		Dev Econ
Development and change	Dev Change	0012-155X		Dev Change
Development digest	Dev Dig	0012-1576		Dev Dig
Development, growth & differentiation	Dev Growth Differ	0012-1592	1440-169X	Dev. Growth Differ.
Developmental biology	Dev Biol	0012-1606	1095-564X	Dev. Biol.
Developmental medicine and child neurology	Dev Med Child Neurol	0012-1622	1469-8749	Dev Med Child Neurol
Developmental psychobiology	Dev Psychobiol	0012-1630	1098-2302	Dev Psychobiol
Developmental psychology	Dev Psychol	0012-1649	1939-0599	Dev Psychol
Developpement & civilisations	Dev Civilis	0012-1657		Dev Civilis
El Dia medico	Dia Med	0012-1762		Dia Med
Le Diabete	Diabete	0012-1770		Diabete
Diabetes	Diabetes	0012-1797	1939-327X	Diabetes
Diabetologia	Diabetologia	0012-186X	1432-0428	Diabetologia
Dialog	Dialog	0012-2033		Dialog
Dialogue	Dialogue Can Philos Assoc	0012-2173		Dialogue Can Philos Assoc
The Dickensian	Dickensian	0012-2440		Dickensian
Dickinson law review	Dickinson Law Rev	0012-2459		Dickinson Law Rev
Difesa sociale	Dif Soc	0012-2653		Dif Soc
Digest of neurology and psychiatry	Dig Neurol Psychiatr	0012-2769		Dig Neurol Psychiatr
Digestion	Digestion	0012-2823	1421-9867	Digestion
Dimension	Dimension	0012-2890		Dimension
Il Diritto del lavoro	Dir Lav	0012-3404		Dir Lav
Discrete mathematics	Discrete Math	0012-365X	1872-681X	Discrete Math
Chest	Chest	0012-3692	1931-3543	Chest
Diseases of the colon and rectum	Dis Colon Rectum	0012-3706	1530-0358	Dis. Colon Rectum
Diseases of the nervous system	Dis Nerv Syst	0012-3714		Dis Nerv Syst
Dissent	Dissent	0012-3846		Dissent
District nursing	Dist Nurs	0012-4044		Dist Nurs
District of Columbia Dental Society journal. District of Columbia Dental Society	J Dist Columbia Dent Soc	0012-4060		J Dist Columbia Dent Soc
The Quarterly review	Q Rev DC Nurses Assoc	0012-4079		Q Rev DC Nurses Assoc
XVIIe siecle	XVIIe Siecle	0012-4273		XVIIe Siecle
Documenta ophthalmologica. Advances in ophthalmology	Doc Ophthalmol	0012-4486	1573-2622	Doc Ophthalmol
Doklady biochemistry : proceedings of the Academy of Sciences of the USSR, Biochemistry section / translated from Russian	Dokl Biochem	0012-4958		Dokl. Biochem.
Doklady biological sciences : proceedings of the Academy of Sciences of the USSR, Biological sciences sections / translated from Russian	Dokl Biol Sci	0012-4966	1608-3105	Dokl. Biol. Sci.
Doklady biophysics : proceedings of the Academy of Sciences of the USSR, Biophysics section / translated from Russian	Dokl Biophys	0012-4974		Dokl Biophys
Dominion law reports	Dom Law Rep	0012-5350		Dom Law Rep
Der Donauraum	Donauraum	0012-5415		Donauraum
Drake law review	Drake Law Rev	0012-5938		Drake Law Rev
Drug and cosmetic industry	Drug Cosmet Ind	0012-6527		Drug Cosmet Ind
1199 news. National Union of Hospital and Health Care Employees. District 1199	1199 News	0012-6535		1199 News
Drug and therapeutics bulletin	Drug Ther Bull	0012-6543	1755-5248	Drug Ther Bull
Drug intelligence & clinical pharmacy	Drug Intell Clin Pharm	0012-6578		Drug Intell Clin Pharm
Drug merchandising	Drug Merch	0012-6586		Drug Merch
Drug research reports	Drug Res Rep	0012-6608		Drug Res Rep
Drug topics	Drug Topics	0012-6616		Drug Topics
Drug trade news	Drug Trade News	0012-6624		Drug Trade News
Drugs	Drugs	0012-6667		Drugs
Drugs made in Germany	Drugs Made Ger	0012-6683		Drugs Made Ger
Dublin historical record	Dublin Hist Rec	0012-6861		Dublin Hist Rec
Duke law journal	Duke Law J	0012-7086		Duke Law J
Duodecim; laaketieteellinen aikakauskirja	Duodecim	0012-7183		Duodecim
The Durham University journal. University of Durham	Durham Univ J	0012-7280		Durham Univ J
Dyna	Dyna (Medellin)	0012-7353	2346-2183	Dyna (Medellin)
Dynamische Psychiatrie. Dynamic psychiatry	Dyn Psychiatr	0012-740X		Dyn Psychiatr
EEG-EMG Zeitschrift fur Elektroenzephalographie, Elektromyographie und verwandte Gebiete	EEG EMG Z Elektroenzephalogr Elektromyogr Verwandte Geb	0012-7590		EEG EMG Z Elektroenzephalogr Elektromyogr Verwandte Geb
Early American literature	Early Am Lit	0012-8163		Early Am Lit
Earth and planetary science letters	Earth Planet Sci Lett	0012-821X		Earth Planet. Sci. Lett.
East African medical journal	East Afr Med J	0012-835X		East Afr Med J
East European quarterly	East Eur Q	0012-8449		East Eur Q
The Eastern anthropologist	East Anthropol	0012-8686		East Anthropol
Eastern European economics	East Europ Econ	0012-8775		East Europ Econ
International journal of politics	Int J Polit	0012-8783		Int J Polit
Eastern horizon	East Horiz	0012-8813		East Horiz
Ebony	Ebony	0012-9011		Ebony
Echoes	Echoes	0012-933X		Echoes
Ecological monographs	Ecol Monogr	0012-9615		Ecol Monogr
The Ecologist	Ecologist	0012-9631		Ecologist
Ecology	Ecology	0012-9658		Ecology
Econometrica : journal of the Econometric Society	Econometrica	0012-9682		Econometrica
Economia & lavoro	Econ Lav	0012-978X		Econ Lav
Economia e storia	Econ Stor	0012-9798		Econ Stor
Economic and political weekly	Econ Polit Wkly	0012-9976		Econ Polit Wkly
The Economic and social review	Econ Soc Rev (Irel)	0012-9984		Econ Soc Rev (Irel)
Economic botany	Econ Bot	0013-0001		Econ. Bot.
Economic development and cultural change	Econ Dev Cult Change	0013-0079		Econ Dev Cult Change
Economic geography	Econ Geogr	0013-0095		Econ Geogr
The Economic history review	Econ Hist Rev	0013-0117	1468-0289	Econ Hist Rev
Economic journal (London, England)	Econ J (London)	0013-0133	1468-0297	Econ J (London)
The Economic record	Econ Rec	0013-0249		Econ Rec
Economie et medecine animales	Econ Med Anim	0013-0524		Econ Med Anim
Economies et societes	Econ Soc (Paris)	0013-0567		Econ Soc (Paris)
Economisch-statistische Berichten	Econ Stat Ber	0013-0583		Econ Stat Ber
Economist (London, England : 1843)	Economist	0013-0613		Economist
De Economist	Economist (Leiden)	0013-063X		Economist (Leiden)
Ecrits de Paris: revue des questions actuelles	Ecrits Paris	0013-0710		Ecrits Paris
Revista ecuatoriana de higiene y medicina tropical	Rev Ecuat Hig Med Trop	0013-0745		Rev Ecuat Hig Med Trop
The Ecumenical review	Ecum Rev	0013-0796		Ecum Rev
Edinburgh Dental Hospital gazette	Edinb Dent Hosp Gaz	0013-0907		Edinb Dent Hosp Gaz
Editorial research reports	Editor Res Rep	0013-0958		Editor Res Rep
Educacion dental	Educ Dent (Ica)	0013-1083		Educ Dent (Ica)
Educacion medica y salud	Educ Med Salud	0013-1091		Educ Med Salud
Education and training of the mentally retarded	Educ Train Ment Retard	0013-1237		Educ Train Ment Retard
Education and urban society	Educ Urban Soc	0013-1245		Educ Urban Soc
Education in science : the bulletin of the Association for Science Education	Educ Sci	0013-1377		Educ Sci
Education libraries bulletin	Libr Bull Univ Lond	0013-1407		Libr Bull Univ Lond
Educational administration quarterly : EAQ	Educ Adm Q	0013-161X		Educ Adm Q
Educational and psychological measurement	Educ Psychol Meas	0013-1644		Educ Psychol Meas
The Educational forum	Educ Forum	0013-1725		Educ Forum
Educational horizons	Educ Horiz	0013-175X		Educ Horiz
Educational leadership : journal of the Department of Supervision and Curriculum Development, N.E.A	Educ Leadersh	0013-1784		Educ Leadersh
The Educational record	Educ Rec	0013-1873		Educ Rec
Educational research; a review for teachers and all concerned with progress in education	Educ Res (Windsor)	0013-1881	1469-5847	Educ Res (Windsor)
Educational researcher (Washington, D.C. : 1972)	Educ Res	0013-189X	1935-102X	Educ Res
Educational broadcasting international	Educ Broadcast Int	0013-1970		Educ Broadcast Int
Educational theory	Educ Theory	0013-2004		Educ Theory
Eesti NSV Teaduste Akadeemia toimetised. Bioloogia = Izvestiia Akademii nauk Estonskoi SSR. Biologiia	Eesti Nsv Tead Akad TOIM Biol	0013-2144		Eesti Nsv Tead Akad TOIM Biol
Effluent and water treatment journal	Effluent Water Treat J	0013-2217		Effluent Water Treat J
Egeszsegtudomany	Egeszsegtudomany	0013-2268		Egeszsegtudomany
L'Egypte contemporaine	Egypte Contemp	0013-239X		Egypte Contemp
The Journal of the Egyptian Medical Association	J Egypt Med Assoc	0013-2411		J Egypt Med Assoc
The Journal of the Egyptian Public Health Association	J Egypt Public Health Assoc	0013-2446	2090-262X	J Egypt Public Health Assoc
Eighteenth-century studies	Eighteenth Century Stud	0013-2586	1086-315X	Eighteenth Century Stud
Eire-Ireland; a journal of Irish studies	Eire Irel	0013-2683		Eire Irel
Ekistics; reviews on the problems and science of human settlements	Ekistics	0013-2942		Ekistics
Ekonomicky casopis	Ekon Cas	0013-3035		Ekon Cas
Ekonomska misao	Ekon Misao	0013-323X		Ekon Misao
Ekonomska revija	Ekon Revija	0013-3256		Ekon Revija
Eksperimental'naia khirurgiia i anesteziologiia	Eksp Khir Anesteziol	0013-3329		Eksp Khir Anesteziol
Journal of the Electrochemical Society	J Electrochem Soc	0013-4651		J Electrochem Soc
Electrochimica acta	Electrochim Acta	0013-4686		Electrochim. Acta
Electroencephalography and clinical neurophysiology	Electroencephalogr Clin Neurophysiol	0013-4694		Electroencephalogr Clin Neurophysiol
Electromyography	Electromyography	0013-4732		Electromyography
Electronics letters	Electron Lett	0013-5194		Electron Lett
Biomedizinische Technik. Biomedical engineering	Biomed Tech (Berl)	0013-5585	1862-278X	Biomed Tech (Berl)
The Elementary school journal	Elem Sch J	0013-5984		Elem Sch J
Bulletin of the Eleventh District Dental Society	Bull Eleventh Dist Dent Soc	0013-6166		Bull Eleventh Dist Dent Soc
Journal. Elisha Mitchell Scientific Society, Chapel Hill, N.C	J Elisha Mitchell Sci Soc Chapel Hill N C	0013-6220		J Elisha Mitchell Sci Soc Chapel Hill N C
Emergency medicine	Emerg Med (N Y)	0013-6654		Emerg Med (N Y)
Emerita / Junta para Ampliacion de Estudios, Centro de Estudios Historicos	Emerita	0013-6662		Emerita
Emory magazine	Emory Mag	0013-6727		Emory Mag
Employee benefit plan review	Employee Benefit Plan Rev	0013-6808		Employee Benefit Plan Rev
L'Encephale	Encephale	0013-7006		Encephale
Encounter	Encounter (Lond)	0013-7073		Encounter (Lond)
Encounter	Encounter	0013-7081		Encounter
Endocrinologia e scienza della costituzione	Endocrinol Sci Cost	0013-7197		Endocrinol Sci Cost
Endocrinologia experimentalis	Endocrinol Exp	0013-7200		Endocrinol. Exp.
Endocrinologia japonica	Endocrinol Jpn	0013-7219	2185-6370	Endocrinol. Jpn.
Endocrinology	Endocrinology	0013-7227	1945-7170	Endocrinology
Endocrinologia y terapeutica	Endocr Terap	0013-7243		Endocr Terap
Endokrinologie	Endokrinologie	0013-7251		Endokrinologie
Endoscopy	Endoscopy	0013-726X	1438-8812	Endoscopy
Enfance; psychologie, pedagogie, neuropsychiatrie, sociologie	Enfance	0013-7545		Enfance
L'enfant en milieu tropical	Enfant Milieu Trop	0013-7561		Enfant Milieu Trop
Engei Gakkai zasshi. Engei Gakkai (Japan)		0013-7626	1880-358X	Engei Gakkai Zasshi
Engineering and science	Eng Sci	0013-7812		Eng Sci
Engineering fracture mechanics	Eng Fract Mech	0013-7944		Eng Fract Mech
The English historical review	Engl Hist Rev	0013-8266		Engl Hist Rev
English language notes	Engl Lang Notes	0013-8282		Engl Lang Notes
ELH	ELH	0013-8304	1080-6547	ELH
English literary renaissance	Engl Lit Renaiss	0013-8312		Engl Lit Renaiss
Entomologia experimentalis et applicata	Entomol Exp Appl	0013-8703	1570-8703	Entomol. Exp. Appl.
Entomological news	Entomol News	0013-872X		Entomol. News
Annals of the Entomological Society of America	Ann Entomol Soc Am	0013-8746		Ann. Entomol. Soc. Am.
Journal of the Entomological Society of Southern Africa	J Entomol Soc South Afr	0013-8789		J Entomol Soc South Afr
Proceedings of the Entomological Society of Washington		0013-8797		Proc. Entomol. Soc. Wash.
Entomologische berichten		0013-8827		Entomolog Ber
Entomologische Zeitschrift mit Insektenborse		0013-8843		Entomol. Z. Insektenborse
Entomologisk tidskrift	Entomol Tidskr	0013-886X		Entomol Tidskr
L' Entomologiste		0013-8886		Entomologiste (Paris)
Entomologist's gazette	Entomol Gaz	0013-8894		Entomol Gaz
Environment	Environment	0013-9157		Environment
Environment and behavior	Environ Behav	0013-9165		Environ Behav
Environmental action	Environ Aciton	0013-922X		Environ Aciton
Environmental letters	Environ Lett	0013-9300		Environ Lett
Environmental research	Environ Res	0013-9351	1096-0953	Environ. Res.
Environmental science & technology	Environ Sci Technol	0013-936X	1520-5851	Environ. Sci. Technol.
Enzymologia	Enzymologia	0013-9424		Enzymologia
Enzyme	Enzyme	0013-9432		Enzyme
Epatologia	Epatologia	0013-9475		Epatologia
Epigraphica	Epigraphica	0013-9572		Epigraphica
Epilepsia	Epilepsia	0013-9580	1528-1167	Epilepsia
Episteme; rivista critica di storia delle scienze mediche e biologiche	Episteme	0013-9637		Episteme
Epitheorese Koinonikon Ereunon	Epitheor Koin Ereun	0013-9696		Epitheor Koin Ereun
Die Erde; Zeitschrift der Gesellschaft fur Erdkunde zu Berlin	Erde	0013-9998		Erde
Erdkunde	Erdkunde	0014-0015		Erdkunde
Erfahrungsheilkunde	Erfahrungsheilkunde	0014-0082		Erfahrungsheilkunde
Ergonomics	Ergonomics	0014-0139	1366-5847	Ergonomics
Espaces et societes (Paris, France)	Espaces Soc	0014-0481		Espaces Soc
Esprit (Paris, France : 1932)	Esprit	0014-0759		Esprit
The Bulletin - Essex County Dental Society	Bull Essex Cty Dent Soc	0014-0929		Bull Essex Cty Dent Soc
Essex Institute historical collections	Essex Inst Hist Collect	0014-0953		Essex Inst Hist Collect
Essex journal	Essex J	0014-0961		Essex J
Estadistica	Estadastica	0014-1135		Estadastica
Estomatologia	Estomatologia	0014-1356		Estomatologia
Estomatologia e cultura	Estomatol Cult	0014-1364		Estomatol Cult
Estudios clasicos	Estud Cl	0014-1453		Estud Cl
Estudios geograficos	Estud Geogr	0014-1496		Estud Geogr
Etc.; a review of general semantics	Etc	0014-164X		Etc
Ethics	Ethics	0014-1704		Ethics
Ethiopia observer	Ethiop Obs	0014-1720		Ethiop Obs
Ethiopian medical journal	Ethiop Med J	0014-1755		Ethiop. Med. J.
Ethnohistory (Columbus, Ohio)	Ethnohistory	0014-1801		Ethnohistory
Ethnology	Ethnology	0014-1828		Ethnology
Ethnos	Ethnos	0014-1844		Ethnos
Etudes	Etudes (Paris)	0014-1941		Etudes (Paris)
Etudes anglaises (Periodical)	Etud Angl	0014-195X		Etud Angl
Etudes classiques (Namur, Belgium)	Etud Class	0014-200X		Etud Class
Etudes francaises (Montreal, Quebec)	Etud Fr	0014-2085	1492-1405	Etud Fr
Etudes freudiennes	Etudes Freud	0014-2107		Etudes Freud
Etudes germaniques	Etud Ger	0014-2115		Etud Ger
Etudes internationales	Etud Int	0014-2123		Etud Int
Etudes rurales	Etud Rurales	0014-2182		Etud Rurales
Euphytica; Netherlands journal of plant breeding		0014-2336		Euphytica
Europa-Archiv	Europa Archiv	0014-2476		Europa Archiv
Europa ethnica	Eur Ethn	0014-2492		Eur Ethn
Revista clinica espanola	Rev Clin Esp	0014-2565	1578-1860	Rev Clin Esp
Europa medicophysica	Eura Medicophys	0014-2573	1827-1804	Eura Medicophys
Europe; revue litteraire mensuelle	Europe	0014-2751		Europe
European economic review	Eur Econ Rev	0014-2921		Eur Econ Rev
European journal of biochemistry / FEBS	Eur J Biochem	0014-2956	1432-1033	Eur. J. Biochem.
European journal of cancer	Eur J Cancer	0014-2964		Eur J Cancer
European journal of clinical investigation	Eur J Clin Invest	0014-2972	1365-2362	Eur. J. Clin. Invest.
European journal of immunology	Eur J Immunol	0014-2980	1521-4141	Eur. J. Immunol.
European journal of pharmacology	Eur J Pharmacol	0014-2999	1879-0712	Eur. J. Pharmacol.
European neurology	Eur Neurol	0014-3022	1421-9913	Eur. Neurol.
European polymer journal	Eur Polym J	0014-3057	1873-1945	Eur Polym J
European studies review	Eur Stud Rev	0014-3111		Eur Stud Rev
European surgical research. Europaische chirurgische Forschung. Recherches chirurgicales europeennes	Eur Surg Res	0014-312X	1421-9921	Eur Surg Res
Evolution; international journal of organic evolution	Evolution	0014-3820	1558-5646	Evolution
L' Evolution medicale	Evol Med	0014-3847		Evol Med
L' Evolution psychiatrique	Evol Psychiatr (Paris)	0014-3855		Evol Psychiatr (Paris)
Exceptional children	Except Child	0014-4029		Except Child
Excerpta medica. Section 12, Ophthalmology	Excerpta Med (Ophthalmol)	0014-4169		Excerpta Med (Ophthalmol)
Excerpta medica. Section 13, Dermatology and venereology	Excerpta Med (Dermatol)	0014-4177		Excerpta Med (Dermatol)
Excerpta medica. Section 20, Gerontology and geriatrics	Excerpta Medica 20 Gerontol Geriatr	0014-424X		Excerpta Medica 20 Gerontol Geriatr
Excerpta medica. Section 28, Urology and nephrology	Excerpta Med (Urol)	0014-4320		Excerpta Med (Urol)
Executive housekeeper	Exec Housekeeper	0014-455X		Exec Housekeeper
Expedition	Expedition	0014-4738		Expedition
Experientia	Experientia	0014-4754		Experientia
Experimental and molecular pathology	Exp Mol Pathol	0014-4800	1096-0945	Exp. Mol. Pathol.
Experimental brain research	Exp Brain Res	0014-4819	1432-1106	Exp Brain Res
Experimental cell research	Exp Cell Res	0014-4827	1090-2422	Exp. Cell Res.
Experimental eye research	Exp Eye Res	0014-4835	1096-0007	Exp. Eye Res.
Experimental mechanics	Exp Mech	0014-4851	1741-2765	Exp Mech
Experimental medicine and surgery	Exp Med Surg	0014-4878		Exp Med Surg
Experimental neurology	Exp Neurol	0014-4886	1090-2430	Exp. Neurol.
Experimental parasitology	Exp Parasitol	0014-4894	1090-2449	Exp. Parasitol.
Experimentelle Pathologie	Exp Pathol (Jena)	0014-4908		Exp Pathol (Jena)
Explorations in economic history	Explor Econ Hist	0014-4983		Explor Econ Hist
Explorers journal	Explor J	0014-5025		Explor J
The Expository times	Expo Times	0014-5246		Expo Times
Eye, ear, nose & throat monthly	Eye Ear Nose Throat Mon	0014-5491		Eye Ear Nose Throat Mon
FEBS letters	FEBS Lett	0014-5793	1873-3468	FEBS Lett.
Revista da Faculdade de Farmacia e Odontologia de Araraquara	Rev Fac Farm Odontol Araraquara	0014-6684		Rev Fac Farm Odontol Araraquara
Revista de la Facultad de Ciencias Medicas (Cordoba, Argentina)	Rev Fac Cien Med Univ Nac Cordoba	0014-6722	1853-0605	Rev Fac Cien Med Univ Nac Cordoba
Faits et tendances	Fait Tend	0014-7052		Fait Tend
Family circle (Mount Morris, Ill.)	Fam Circle	0014-7206		Fam Circle
Family coordinator	Fam Coord	0014-7214		Fam Coord
Family health	Fam Health	0014-7249		Fam Health
Family law (Chichester)	Family Law	0014-7281		Family Law
Family law quarterly	Fam Law Q	0014-729X		Fam Law Q
Family planning	Fam Plann	0014-7338		Fam Plann
Family planning perspectives	Fam Plann Perspect	0014-7354		Fam Plann Perspect
Family planning quarterly	Fam Plann Q	0014-7362		Fam Plann Q
Family process	Fam Process	0014-7370	1545-5300	Fam Process
Far Eastern economic review	Far East Econ Rev	0014-7591		Far East Econ Rev
Discussions of the Faraday Society	Discuss Faraday Soc	0014-7664		Discuss Faraday Soc
Farmaceuticky obzor	Farm Obz	0014-8172		Farm Obz
El Farmaceutico	Farmaceutico	0014-8180		Farmaceutico
Farmaceutski glasnik	Farm Glas	0014-8202		Farm Glas
Farmacevtisk revy	Farm Revy	0014-8210		Farm Revy
Farmacevtski vestnik	Farm Vestn	0014-8229		Farm. Vestn.
Farmacja polska	Farm Pol	0014-8261		Farm Pol
Farmaco (Societa chimica italiana : 1989)	Farmaco	0014-827X		Farmaco
Farmakologiia i toksikologiia	Farmakol Toksikol	0014-8318		Farmakol Toksikol
Farmakoterapi	Farmakoterapi	0014-8326		Farmakoterapi
Feddes repertorium		0014-8962		Feddes Repert.
Federal bar journal : the official publication of the Federal Bar Association	Fed Bar J	0014-9039		Fed Bar J
Federal probation	Fed Probat	0014-9128		Fed Probat
Federation bulletin / Federation of State Medical Boards of the United States	Fed Bull	0014-9306		Fed Bull
Federation proceedings	Fed Proc	0014-9446		Fed. Proc.
Quaerendo	Quaerendo	0014-9527		Quaerendo
Il Fegato	Fegato	0014-9659		Fegato
Fel'dsher i akusherka	Feldsher Akush	0014-9772		Feldsher Akush
Fennia	Fennia	0015-0010		Fennia
Ferroelectrics	Ferroelectrics	0015-0193	1563-5112	Ferroelectrics
Fertility and sterility	Fertil Steril	0015-0282	1556-5653	Fertil. Steril.
Fichero medico terapeutico	Fich Med Ter Puriss	0015-0606		Fich Med Ter Puriss
Fieldiana. botany		0015-0746		Fieldiana Bot
The Filson Club history quarterly	Filson Club Hist Q	0015-1874		Filson Club Hist Q
Finance & development	Finance Dev	0015-1947		Finance Dev
Finanz-archiv : Zeitschrift fur das Gesamte Finanzwesen	Finanzarchiv	0015-2218		Finanzarchiv
Finska lakaresallskapets handlingar	Fin Lakaresallsk Handl	0015-2501		Fin Lakaresallsk Handl
Fire journal (Boston, Mass.)	Fire J	0015-2617		Fire J
Fire technology	Fire Technol	0015-2684		Fire Technol
Fiziologia normala si patologica	Fiziol Norm Patol	0015-3281		Fiziol Norm Patol
Fiziologicheskii zhurnal SSSR imeni I. M. Sechenova	Fiziol Zh SSSR Im I M Sechenova	0015-329X		Fiziol Zh SSSR Im I M Sechenova
Fiziolohichnyi zhurnal	Fiziol Zh	0015-3311		Fiziol Zh
Biochemie und Physiologie der Pflanzen : BPP	Biochem Physiol Pflanz	0015-3796		Biochem. Physiol. Pflanz.
Floresta	Floresta	0015-3826	1982-4688	Floresta
The Florida Bar journal	FLA Bar J	0015-3915		FLA Bar J
Florida dental journal	Fla Dent J	0015-3990		Fla Dent J
The Florida entomologist		0015-4040		Fla. Entomol.
Florida health notes	Fla Health Notes	0015-4105		Fla Health Notes
The Florida historical quarterly	Fla Hist Q	0015-4113		Fla Hist Q
The Journal of the Florida Medical Association	J Fla Med Assoc	0015-4148		J Fla Med Assoc
The Florida nurse	Fla Nurse	0015-4199		Fla Nurse
Florida supplement : decisions of lower courts of record and state commissions	Fla Suppl	0015-4318		Fla Suppl
Focus on exceptional children	Focus Except Child	0015-511X		Focus Except Child
Fogorvosi szemle	Fogorv Sz	0015-5314		Fogorv Sz
Foldrajzi ertesito	Foldr Ert	0015-5403		Foldr Ert
Folha medica	Folha Med	0015-5454		Folha Med
Folia allergologica	Folia Allergol (Roma)	0015-5470		Folia Allergol (Roma)
Folia biologica	Folia Biol (Krakow)	0015-5497		Folia Biol. (Krakow)
Folia biologica	Folia Biol (Praha)	0015-5500		Folia Biol. (Praha)
Folia clinica et biologica	Folia Clin Biol (Sao Paulo)	0015-5519		Folia Clin Biol (Sao Paulo)
Folia clinica internacional	Folia Clin Int (Barc)	0015-5527		Folia Clin Int (Barc)
Folia endocrinologica	Folia Endocrinol	0015-5535		Folia Endocrinol
Folia haematologica; internationales Magazin fur Blutforschung	Folia Haematol (Frankf)	0015-556X		Folia Haematol (Frankf)
Folia hereditaria et pathologica	Folia Hered Pathol (Milano)	0015-5578		Folia Hered Pathol (Milano)
Folia histochemica et cytochemica	Folia Histochem Cytochem (Krakow)	0015-5586		Folia Histochem Cytochem (Krakow)
Folia humanistica	Folia Humanist	0015-5594		Folia Humanist
Folia medica. Folia medica (Naples, Italy)	Folia Med (Napoli)	0015-5608		Folia Med (Napoli)
Folia medica Cracoviensia	Folia Med Cracov	0015-5616		Folia Med Cracov
Folia medica Neerlandica	Folia Med Neerl	0015-5624		Folia Med Neerl
Folia microbiologica	Folia Microbiol (Praha)	0015-5632	1874-9356	Folia Microbiol. (Praha)
Folia morphologica	Folia Morphol (Praha)	0015-5640		Folia Morphol (Praha)
Folia morphologica	Folia Morphol (Warsz)	0015-5659		Folia Morphol. (Warsz)
Folia orientalia	Folia Orient	0015-5675		Folia Orient
Folia parasitologica	Folia Parasitol (Praha)	0015-5683	1803-6465	Folia Parasitol.
Nihon yakurigaku zasshi. Folia pharmacologica Japonica	Nihon Yakurigaku Zasshi	0015-5691	1347-8397	Nippon Yakurigaku Zasshi
Folia phoniatrica	Folia Phoniatr (Basel)	0015-5705		Folia Phoniatr (Basel)
Folia primatologica; international journal of primatology	Folia Primatol (Basel)	0015-5713	1421-9980	Folia Primatol.
Folia psychiatrica et neurologica japonica	Folia Psychiatr Neurol Jpn	0015-5721		Folia Psychiatr Neurol Jpn
Folia veterinaria	Folia Vet	0015-5748		Folia Vet
Folklore	Folklore	0015-587X		Folklore
Folklore brabancon	Folkl Brabancon	0015-590X		Folkl Brabancon
Folklore suisse	Folkl Suisse	0015-5969		Folkl Suisse
Revista de fomento social	Rev Fom Soc	0015-6043		Rev Fom Soc
Food and cosmetics toxicology	Food Cosmet Toxicol	0015-6264		Food Cosmet Toxicol
Food, drug, cosmetic law journal	Food Drug Cosmet Law J	0015-6361		Food Drug Cosmet Law J
Shokuhin eiseigaku zasshi. Journal of the Food Hygienic Society of Japan	Shokuhin Eiseigaku Zasshi	0015-6426	1882-1006	Shokuhin Eiseigaku Zasshi
Food Research Institute studies in agricultural economics, trade, and development	Food Res Inst Stud Agric Econ Trade Dev	0015-6566		Food Res Inst Stud Agric Econ Trade Dev
Food technology	Food Technol	0015-6639		Food Technol
Forbes	Forbes	0015-6914		Forbes
Ford Foundation letter. Ford Foundation	Lett Ford Found	0015-699X		Lett Ford Found
Fordham law review / edited by Fordham law students	Fordham Law Rev	0015-704X		Fordham Law Rev
Foreign affairs (Council on Foreign Relations)	Foreign Aff	0015-7120		Foreign Aff
Foreign policy	Foreign Policy	0015-7228		Foreign Policy
Journal - Forensic Science Society	J Forensic Sci Soc	0015-7368		J Forensic Sci Soc
Forestry (London, England)		0015-752X	1464-3626	Forestry (Lond)
Forschungen zur Volks- und Landeskunde	Forsch Volks Landeskd	0015-7902		Forsch Volks Landeskd
Forsvarsmedicin	Forsvarsmedicin	0015-8011		Forsvarsmedicin
Fortpflanzung, Besamung, und Aufzucht der Haustiere	Fortpflanz Besamung Aufzucht Haustiere	0015-8135		Fortpflanz Besamung Aufzucht Haustiere
Fortschritte auf dem Gebiete der Rontgenstrahlen und der Nuklearmedizin	Fortschr Geb Rontgenstr Nuklearmed	0015-8151		Fortschr Geb Rontgenstr Nuklearmed
Fortschritte der Kieferorthopadie	Fortschr Kieferorthop	0015-816X		Fortschr Kieferorthop
Fortschritte der Medizin	Fortschr Med	0015-8178		Fortschr. Med.
Fortschritte der Neurologie, Psychiatrie, und ihrer Grenzgebiete	Fortschr Neurol Psychiatr Grenzgeb	0015-8194		Fortschr Neurol Psychiatr Grenzgeb
Fortune	Fortune	0015-8259		Fortune
Forum (Chicago, Ill.)	Forum	0015-8356		Forum
Forum; revista invatamintului superior	Forum Rev Invat Super	0015-8453		Forum Rev Invat Super
Foundation news	Found News	0015-8976		Found News
Foundations	Foundations	0015-8992		Foundations
Fra Sundhedsstyrelsen	Fra Sundhedsstyr	0015-9263		Fra Sundhedsstyr
Il Fracastoro	Fracastoro	0015-9271		Fracastoro
Frankfurter Hefte	Frankf Hefte	0015-9999		Frankf Hefte
Journal of the Franklin Institute	J Franklin Inst	0016-0032		J Franklin Inst
Free China review	Free China Rev	0016-030X		Free China Rev
Freedom at issue	Freedom Issue	0016-0520		Freedom Issue
Freedomways	Freedomways	0016-061X		Freedomways
The Freeman	Freeman	0016-0652		Freeman
French historical studies	Fr Hist Stud	0016-1071		Fr Hist Stud
French studies	Fr Stud	0016-1128		Fr Stud
Il Friuli medico	Friuli Med	0016-1535		Friuli Med
Frontier Nursing Service quarterly bulletin	Front Nurs Serv Q Bull	0016-2116		Front Nurs Serv Q Bull
Ftiziologia	Ftiziologia	0016-2329		Ftiziologia
Fuel (London, England)	Fuel (Lond)	0016-2361	1873-7153	Fuel (Lond)
Ful-, orr-, gegegyogyazat	Fulorrgegegyogyaszat	0016-237X		Fulorrgegegyogyaszat
Fukuoka igaku zasshi = Hukuoka acta medica	Fukuoka Igaku Zasshi	0016-254X		Fukuoka Igaku Zasshi
[Fukushima igaku zasshi] Fukushima medical journal	Fukushima Igaku Zasshi	0016-2582		Fukushima Igaku Zasshi
Fukushima journal of medical science	Fukushima J Med Sci	0016-2590	2185-4610	Fukushima J Med Sci
Fund raising management	Fund Raising Manage	0016-268X		Fund Raising Manage
Archivos de la Fundacion Roux-Ocefa	Arch Fund Roux Ocefa	0016-271X		Arch Fund Roux Ocefa
The Furrow	Furrow	0016-3120		Furrow
Futures	Futures	0016-3287		Futures
The Futurist	Futurist	0016-3317		Futurist
Fysiatricky vestnik. Ceskoslovenska fysiatricka spolecnost v Praze	Fysiatr Vestn Cesk Fysiatr Spol	0016-3368		Fysiatr Vestn Cesk Fysiatr Spol
G.E.N	G E N	0016-3503		G E N
GP	GP	0016-3600		GP
Gaceta medica de Mexico	Gac Med Mex	0016-3813		Gac Med Mex
Gaceta medica espanola	Gac Med Esp	0016-3821		Gac Med Esp
Galenica acta	Galen Acta	0016-4011		Galen Acta
The Gallup opinion index	Gallup Opin Index	0016-4194		Gallup Opin Index
Ganka. Ophthalmology	Ganka	0016-4488		Ganka
Gann = Gan	Gann	0016-450X		Gann
Gastroenterology	Gastroenterology	0016-5085	1528-0012	Gastroenterology
Gastrointestinal endoscopy	Gastrointest Endosc	0016-5107	1097-6779	Gastrointest. Endosc.
Gayana. Botanica / Universidad de Concepcion, facultad de ciencias naturales y oceanograficas		0016-5301	0717-6643	Gayana Bot
Gaz, woda; technika sanitarna	Gaz Woda Tech	0016-5352		Gaz Woda Tech
La Gazette des archives	Gaz Arch	0016-5522		Gaz Arch
Gazette medicale de France	Gaz Med Fr	0016-5557		Gaz Med Fr
Gazzetta chimica Italiana	Gazz Chim Ital	0016-5603		Gazz Chim Ital
Gazzetta internazionale di medicina e chirurgia	Gazz Int Med Chir	0016-5662		Gazz Int Med Chir
Gazzetta sanitaria	Gazz Sanit	0016-5697		Gazz Sanit
Geburtshilfe und Frauenheilkunde	Geburtshilfe Frauenheilkd	0016-5751	1438-8804	Geburtshilfe Frauenheilkd
Gegenbaurs morphologisches Jahrbuch	Gegenbaurs Morphol Jahrb	0016-5840		Gegenbaurs Morphol Jahrb
Bulletin - Geisinger Medical Center	Bull Geisinger	0016-5913		Bull Geisinger
Geneeskunde en sport	Geneeskd Sport	0016-6448		Geneeskd Sport
Geneeskundige bladen uit kliniek en laboratorium voor de praktijk	Geneeskd Bl	0016-6456		Geneeskd Bl
Geneeskundige gids	Geneeskd Gids	0016-6464		Geneeskd Gids
General and comparative endocrinology	Gen Comp Endocrinol	0016-6480	1095-6840	Gen. Comp. Endocrinol.
Genetic psychology monographs	Genet Psychol Monogr	0016-6677		Genet Psychol Monogr
Genetica iberica	Genet Iber	0016-6693		Genet Iber
Genetica	Genetica	0016-6707	1573-6857	Genetica
Genetics research	Genet Res (Camb)	0016-6723	1469-5073	Genet Res (Camb)
Genetics	Genetics	0016-6731	1943-2631	Genetics
Genetika	Genetika	0016-6758		Genetika
Geneve-Afrique. Geneva-Africa	Geneva Afr	0016-6774		Geneva Afr
Genus	Genus	0016-6987		Genus
Geochemical journal	Geochem J	0016-7002		Geochem J
Geochimica et cosmochimica acta	Geochim Cosmochim Acta	0016-7037		Geochim. Cosmochim. Acta
Geoderma	Geoderma	0016-7061	1872-6259	Geoderma
Geoforum; journal of physical, human, and regional geosciences	Geoforum	0016-7185		Geoforum
Geograficky casopis = Geograficheskii zhurnal = Geographical review	Geogr Cas	0016-7193		Geogr Cas
Geografiia v shkole (Moscow, Russia)	Geogr Shkole	0016-7207		Geogr Shkole
Geografisch tijdschrift	Geogr Tydschr	0016-7215		Geogr Tydschr
Geografisk tidskrift / udgivet af Bestyrelsen for Det Kongelige danske geografiske selskab	Geogr Tidsskr	0016-7223		Geogr Tidsskr
Geografski glasnik = Bulletin de geographie	Geog Glas	0016-7258		Geog Glas
Geographia Polonica	Geogr Pol	0016-7282		Geogr Pol
Geographica helvetica	Geogr Helv	0016-7312		Geogr Helv
Geographical analysis	Geogr Anal	0016-7363		Geogr Anal
The Geographical journal	Geogr J	0016-7398		Geogr J
The Geographical magazine	Geogr Mag	0016-741X		Geogr Mag
Geographical review	Geogr Rev	0016-7428		Geogr Rev
Chirigaku hyoron	Chirigaku Hyoron	0016-7444		Chirigaku Hyoron
Geographische Berichte	Geogr Ber	0016-7452		Geogr Ber
Geographische Rundschau	Geogr Rundsch	0016-7460		Geogr Rundsch
Geographische Zeitschrift	Geogr Z	0016-7479		Geogr Z
Geography (Sheffield, England)	Geography	0016-7487		Geography
Geological magazine	Geol Mag	0016-7568		Geol Mag
Geological Society of America bulletin	Geol Soc Am Bull	0016-7606		Geol Soc Am Bull
Journal of the Geological Society	J Geol Soc London	0016-7649		J Geol Soc London
Geologische Rundschau : Zeitschrift fur allgemeine Geologie	Geol Rundsch	0016-7835		Geol Rundsch
Proceedings of the Geologists' Association. Geologists' Association	Proc Geol Assoc	0016-7878		Proc Geol Assoc
The George Washington law review	George Washington Law Rev	0016-8076		George Washington Law Rev
Georgetown dental journal	Georgetown Dent J	0016-8084		Georgetown Dent J
The Georgetown law journal	Georgetown Law J	0016-8092		Georgetown Law J
Georgetown medical bulletin	Georgetown Med Bull	0016-8106		Georgetown Med Bull
Bulletin of the Georgia Academy of Science	Bull Ga Acad Sci	0016-8114		Bull Ga Acad Sci
Journal of the Georgia Dental Association	J Ga Dent Assoc	0016-819X		J Ga Dent Assoc
The Georgia historical quarterly	Ga Hist Q	0016-8297		Ga Hist Q
Georgia law review (Athens, Ga. : 1966)	Georgia Law Rev	0016-8300		Georgia Law Rev
Georgia nursing	Ga Nurse	0016-8335		Ga Nurse
The Georgia review	Ga Rev	0016-8386		Ga Rev
Georgia State Bar journal	Georgia State Bar J	0016-8416		Georgia State Bar J
Geotimes	Geotimes	0016-8556		Geotimes
Geriatrics	Geriatrics	0016-867X	1936-5764	Geriatrics
German life and letters	Ger Life Lett	0016-8777		Ger Life Lett
German medical monthly	Ger Med Mon	0016-8785		Ger Med Mon
Germanisch-Romanische Monatsschrift	Ger Rom Monatsschr	0016-8904		Ger Rom Monatsschr
Germanistik	Germanistik	0016-8912		Germanistik
Gerontologia	Gerontologia	0016-898X		Gerontologia
Gerontologia clinica	Gerontol Clin (Basel)	0016-8998		Gerontol Clin (Basel)
The Gerontologist	Gerontologist	0016-9013	1758-5341	Gerontologist
Geschichte in Wissenschaft und Unterricht	Gesch Wiss Unterr	0016-9056		Gesch Wiss Unterr
Gesnerus	Gesnerus	0016-9161		Gesnerus
Gesundheits-Ingenieur	Gesund Ing	0016-9277		Gesund Ing
Bulletin of the Ghana Geographical Association	Bull Ghana Geogr Assoc	0016-9536		Bull Ghana Geogr Assoc
Ghana medical journal	Ghana Med J	0016-9560		Ghana Med J
The gifted child quarterly	Gift Child Q	0016-9862	1934-9041	Gift Child Q
Gigiena i sanitariia	Gig Sanit	0016-9900		Gig Sanit
Gigiena truda i professional'nye zabolevaniia	Gig Tr Prof Zabol	0016-9919		Gig Tr Prof Zabol
Ginekologia polska	Ginekol Pol	0017-0011		Ginekol. Pol.
Jugoslavenska ginekologija i opstetricija	Jugosl Ginekol Opstet	0017-002X		Jugosl Ginekol Opstet
[truncated: 26,649 more rows]
