# Supplementary material for: Usage Trends of Open Access and Local Journals: A Korean Case Study
Source: PLoS One. 2016 May 19;11(5):e0155843. doi: 10.1371/journal.pone.0155843 (PMC4873189; doi:10.1371/journal.pone.0155843)
Supplement: S14 Table — (XLSX) [file pone.0155843.s015.xlsx]

## Sheet: OA Publishers
OA Publishers	Titles				OA Publishers	Titles
BioMed Central	151				BioMed Central	151
Hindawi Publishing Corporation	36				Hindawi Publishing Corporation	36
Springer	23				Springer	23
Medknow Publications	21				Medknow Publications	21
MDPI AG	16				MDPI AG	16
Consejo Superior de Investigaciones Cientificas	14				Consejo Superior de Investigaciones Cientificas	14
Copernicus Publications	12				Copernicus Publications	12
NISCAIR	12				NISCAIR	12
Scientific and Technical Research Council of Turkey	10				Scientific and Technical Research Council of Turkey	10
Co-Action Publishing	9				Co-Action Publishing	9
Versita	9				Versita	9
Oxford University Press	8				Oxford University Press	8
Consejo Superior de Investigaciones Científicas	7				Consejo Superior de Investigaciones Científicas	7
Dove Medical Press	7				Dove Medical Press	7
Frontiers Media	7				Frontiers Media	7
Tehran University of Medical Sciences	7				Tehran University of Medical Sciences	7
Universidad Nacional de Colombia	7				Universidad Nacional de Colombia	7
Universidade de São Paulo	7				Universidade de São Paulo	7
University of Zagreb	7				University of Zagreb	7
Nature Publishing Group	6				Others	836
Pontificia Universidad Católica de Chile	6					1206
Public Library of Science (PLoS)	6
Termedia Publishing House	6
Universidad Nacional Autónoma de México	6
Czech Academy of Agricultural Sciences	5
Indian Academy of Sciences	5
Polish Academy of Sciences	5
Universidad de Concepción	5
Ivyspring International Publisher	4
Spandidos Publications	4
Universidad Complutense de Madrid	4
Universidad de Chile	4
Universidad del Zulia	4
American Physical Society	3
AOSIS OpenJournals	3
e-Century Publishing Corporation	3
Institute of Mathematical Statistics	3
Kamla-Raj Enterprises, Delhi	3
PAGEPress Publications	3
Pensoft Publishers	3
Pontificia Universidad Católica de Valparaíso	3
S. Karger AG	3
Science Press	3
The Rockefeller University Press	3
Universidad Austral de Chile	3
Universidade Federal de Minas Gerais	3
Universidade Federal do Rio Grande do Sul	3
Wiley	3
American Diabetes Association	2
American Mathematical Society	2
American Museum of Natural History	2
Aves Yayincilik	2
Beilstein-Institut	2
Blackwell	2
Brill	2
Croatian Philosophical Society	2
Ediciones Doyma, S.L.	2
EDP Sciences	2
Elsevier	2
Firenze University Press	2
Galenos Yayincilik	2
Health and Medical Publishing Group	2
HighWire	2
Impact Journals, LLC	2
Indian Academy of Sciences, Springer	2
Instituto Nacional de Investigación y Tecnología Agraria y Alimentaria	2
International Press of Boston, Inc.	2
Karger	2
Medcom Limited	2
Medicinska Naklada, Zagreb	2
Meteorological Society of Japan	2
Museum Nationale d'Histoire Naturelle Paris	2
OceanSide Publications	2
Optical Society of America	2
Pontificia Universidad Javeriana	2
Royan Institute (ACECR), Tehran	2
Sociedad de Biología de Chile	2
Stellenbosch University	2
Universidad de Antioquia	2
Universidad de los Andes	2
Universidad Nacional de Cuyo	2
Universidade Estadual Paulista	2
Universidade Federal de Lavras	2
Universidade Federal de Santa Maria	2
Universitat de Barcelona	2
University of Alberta	2
University of California, Los Angeles	2
University of Pretoria	2
University of São Paulo	2
VINČA Institute of Nuclear Sciences	2
ABM, ABC, ABPol, SBCC, SBCr, SBMM, SBPMat	1
Academia Brasileira de Ciências	1
Academia Brasileira de Neurologia - ABNEURO	1
Academia Mexicana de Cirugía	1
Academia Scientiarum Fennica	1
Academia Sinica	1
Academy of Economic Studies of Bucharest	1
Academy of Science of South Africa	1
Academy of Sciences of the Czech Republic	1
ACG Publications	1
Acta Biochimica Polonica	1
AEDEAN (Asociación española de estudios anglo-norteamericanos)	1
AELFE (Asociación Europea de Lenguas para Fines Específicos)	1
Agora University of Oradea	1
Agriscience University of Santiago de Chile	1
Ahvaz Jundishapur University of Medical Sciences	1
AI Access Foundation	1
Akademi Doktorlar Yayinevi	1
Akademii Rolniczej w Szczecinie	1
Akademika Publishing	1
Alber-Ludwigs-Universität	1
ALOKI Ltd	1
American Association of Colleges of Pharmacy	1
American Association of Neurological Surgeons	1
American Fisheries Society	1
American Geophysical Union (AGU)	1
American Institute of Physics	1
American Library Association	1
American Physiological Society	1
American Society for Cell Biology	1
American Society for Microbiology	1
American Society of Interventional Pain Physicians	1
Ankara University	1
Antropólogos Iberoamericanos en Red (AIBR)	1
Argentinean Association of Computational Mechanics, Brazilian Association of Computational Mechanics, Mexican Association of Numerical Methods in Engineering and Applied Sciences	1
Arheološki muzej, Split	1
Aristotle University of Thessaloniki	1
Arkat USA Inc	1
ASEAN Neurological Association	1
Asian Network for Scientific Information	1
Asociación Argentina de Microbiología	1
Asociación Científica de Economía y Dirección de Empresas	1
Asociación Española de Psicología Conductual (AEPC)	1
Associação Brasileira de Divulgação Científica	1
Associação Brasileira de Olericultura	1
Associação Brasileira de Otorrinolaringologia e Cirurgia Cervicofacial	1
Associação Brasileira de Pesquisa e Pós-Graduação em Fisioterapia	1
Associação Brasileira de Polímeros	1
Associação Brasileira de Pós-Graduação em Saúde Coletiva	1
Associação Brasileira de Psiquiatria - ABP	1
Associação Brasileira de Soldagem	1
Associação Médica Brasileira	1
Associação Nacional de História - ANPUH	1
Associação Universitária de Pesquisa em Psicopatologia Fundamental	1
Association for Applied Botany e. V., German Society for Quality Research on Plant Foods (DGQ)	1
Association for Research in Vision and Ophthalmology	1
Association of Basic Medical Sciences of Federation of Bosnia and Herzegovina	1
Association of Chemical Engineers, Belgrade	1
Association of College and Research Libraries	1
Association of Czech Chemical Societies	1
Association of Surveyors of Slovenia	1
Association of the Chemical Engineers	1
Associazione Italiana di Telerilevamento (AIT)	1
Associazione no profit	1
Associazione Teriologica Italiana	1
Athabasca University Press	1
Australian Computer Society	1
Babes Bolyai University	1
Baishideng Publishing Group Co. Limited	1
Bangladesh Association of Plant Taxonomists	1
Bangladesh Pharmacological Society	1
Biomedical Research Press	1
BMJ Journals	1
Boreal Environment Research Publishing Board	1
Brazilian Association of Sanitary and Environmental Engineering	1
Brazilian Society of Chemical Engineering	1
Brazilian Society of Infectious Diseases	1
Brazilian Society of Plant Breeding	1
Brazilian Statistical Association	1
Budapest University of Technology	1
California State University	1
Canadian Dental Association	1
Canadian Medical Association	1
Canadian Population Society	1
Canadian Society for Pharmaceutical Sciences	1
Cancer Research UK	1
Carnets de Géologie	1
Casa de Oswaldo Cruz, Fundação Oswaldo Cruz	1
Centraalbureau voor Schimmelcultures	1
Central Fisheries Research Institute	1
Centro de Estudios Constitucionales	1
Centro de Investigación y Docencia Económicas	1
Centro Editor Livreiro da Ordem dos Médicos, Sociedade Unipessoal	1
Centro Nacional de Investigaciones Metalurgicas	1
Çevre Koruma ve Araştırma Vakfı (ÇEV-KOR)	1
Chemical Society of Ethiopia	1
Chilean Society of Soil Science	1
Chinese Institute of Design	1
Chinese Medical Association	1
CIC Edizioni Internazionali	1
Clinics Cardive Publishing (Pty) Ltd.	1
Colégio Brasileiro de Parasitologia Veterinaria	1
Colégio Brasileiro de Patologia Animal - CBPA	1
Colegio de Postgraduados	1
Colegio Oficial de Psicólogos del Principado de Asturias	1
Colegiul Medicilor Iasi	1
College of Family Physicians of Canada	1
Comité Latinoamericano de Matemática Educativa	1
Company of Biologists	1
ComSIS Consortium	1
Conselho Brasileiro de Oftalmologia	1
Coquina Press	1
CRA Maize Research Unit	1
Croatian Association of Chemical Engineers	1
Croatian Chemical Society	1
Croatian Dairy Union	1
Croatian Metallurgical Society	1
Croatian Pharmaceutical Society	1
Crop Science Society of Japan	1
Current Zoology	1
CV Ciencias del Deporte RedIRIS	1
Czech Geological Society	1
Czech Geological Survey	1
Danish Medical Association	1
de Gruyter	1
Defence Scientific Information & Documentation Centre, Delhi	1
Departamento de Engenharia Agrícola - UFCG	1
Deutscher Ärzte-Verlag	1
Discrete Mathematics & Theoretical Computer Science	1
Dove Press	1
Drustvo Psihologa Srbije	1
Duke University	1
Duke University School of Law	1
Dustri-Verlag	1
E.H Angle Education and Research Foundation	1
Econometric Society	1
Economists' Association of Vojvodina	1
ECSA-Austria	1
Ediciones ARQ	1
Editions John Libbey Eurotext Limited	1
Editura Academiei Române	1
Edizioni Nuova Cultura	1
Education Association of South Africa (EASA)	1
Eduem - Editora da Universidade Estadual de Maringá	1
Ege University Press	1
Ekin Medical Publishing	1
Electrochemical Science Group	1
Electronic Journals Project	1
Electronics and Telecommunications Research Institute (ETRI)	1
EMBRAPA	1
EMH Swiss Medical Publishers	1
EMW Publishing	1
Escola de Minas	1
Escola Nacional de Saúde Pública, Fundação Oswaldo Cruz	1
Escola Superior de Agricultura	1
ESMON Publicidad	1
Estonian Academy Publishers	1
Estonian Literary Museum, Estonian Folklore Institute	1
European Association for Cardio-thoracic Surgery	1
European Cells & Materials Ltd	1
European Centre for Disease Prevention and Control	1
European Molecular Biology Organization	1
European Optical Society	1
Expert Projects	1
Faculdade de Medicina / USP	1
Facultad de Letras - Pontificia Universidad Católica de Chile	1
Facultad Latinoamericana de Ciencias Sociales, Sede México	1
Faculty of Philosophy, Belgrade	1
Faculty of Veterinary Medicine, Belgrade	1
Federación Bioquímica de la Provincia de Buenos Aires	1
Ferrata Storti Foundation	1
Finnish Society of Forest Science, Finnish Forest Research Institute	1
Florida Entomological Society	1
Forest Research and Management Institute ICAS	1
Foundry Journal Agency	1
Fundação APINCO de Ciência e Tecnologia Avícolas	1
Fundação Escola de Comércio Álvares Penteado	1
Fundação Getúlio Vargas	1
Fundação Zoobotânica do Rio Grande do Sul	1
Fundación Revista Medicina	1
Fundación Universitaria Konrad Lorenz	1
Galenos Yayicilik	1
Galenos Yayinevi	1
Genetics Society of America	1
Genetics Society of Japan	1
Genomic Standards Consortium	1
Geological Society of Denmark	1
Geological Society of Poland	1
Geological Survey of Denmark and Greenland	1
Geometry Balkan Press, Bucharest	1
Geriatrics Society, Ankara	1
German Institute of Global and Area Studies (GIGA)	1
Gobierno de Navarra. Departamento de Salud	1
Grupo Comunicar	1
Hellenic Cardiological Society	1
Hellenic Centre for Marine Research	1
Hiroshima University	1
Hong Kong Academy of Medicine	1
Horizon Scientific Press	1
Hosokawa Powder Technology Foundation	1
Hungarian Academy of Sciences	1
HYLE Publications, Karlsruhe and University of Karlsruhe	1
Ian Pitchford, Ed.& Pub.	1
IfADo - Leibniz Research Centre for Working Environment and Human Factors, Dortmund	1
Igitur, Utrecht Publishing & Archiving Services	1
IJO Press	1
Imprimatur Publications	1
INDA, Association of the Nonwovens Fabrics Industry	1
Index Copernicus International S.A.	1
Indian Academy of Pediatrics	1
Indian Academy of Sciences,Springer	1
Indian Council of Medical Research	1
Informa Healthcare	1
Information Research	1
Inst. of Pharmacology, Polish Acad. of Sciences	1
Institut de Ciències del Mar de Barcelona, CSIC	1
Institut Français du Pétrole	1
Institute for Condensed Matter Physics	1
Institute for Medical Research and Occupational Health, Zagreb	1
Institute for Neohellenic Research	1
Institute of Agricultural Medicine in Lublin	1
Institute of Agrophysics	1
Institute of Chemical Fibres	1
Institute of Geology Zagreb	1
Institute of Information Theory and Automation of the ASCR	1
Institute of Mathematics and Informatics	1
Institute of Metals and Technology with associated publishers	1
Institute of Oceanography and Fisheries, Split	1
Institute of Physical Optics	1
Institute of Physics (IoP)	1
Institute of Physics (IoP) and Deutsche Physikalische Gesellschaft	1
Institute of Physics, National Institute for Materials Science	1
Institute of Physiology, Czech Academy of Sciences	1
Institute of Social Sciences Ivo Pilar	1
Institute of Spontaneous Order Economics	1
Institute of Sport	1
Instituto Agronômico de Campinas	1
Instituto Brasileiro de Relações Internacionais	1
Instituto Colombiano del Petróleo (ICP) - ECOPETROL S.A.	1
Instituto de Biología	1
Instituto de Ecología A.C.	1
Instituto de Investigaciones Agropecuarias, INIA	1
Instituto de Medicina Tropical	1
Instituto Internacional de Ecologia	1
Instituto Nacional de Estatística	1
Instituto Nacional de Investigaciones Forestales, Agrícolas y Pecuarias	1
Instituto Nacional de Matemática Pura e Aplicada	1
Instituto Nacional de Pesquisas da Amazônia	1
Instituto Nacional de Psiquiatría	1
Instituto Nacional de Salud	1
Instituto Nacional de Salud Pública	1
Instituto Oswaldo Cruz, Ministério da Saúde	1
InTech	1
Interciencia Association	1
International AIDS Society	1
International Association of Research Institutes in the History of Art (RIHA)	1
International Centre for Diarrhoeal Disease Research, Bangladesh	1
International Food and Agribusiness Management Association	1
International Forum of Educational Technology & Society	1
International Institute for the Science of Sintering, Beograd	1
International Mountain Society	1
International Scientific Literature Inc.	1
International Scientific Literature, Inc.	1
International Society of Musculoskeletal and Neuronal Interactions	1
International Union for Conservation of Nature (IUCN)	1
Investment Analysts Society of Southern Africa	1
Iranian Mathematical Society	1
Iranian Society of Nephrology	1
Isfahan University of Medical Sciences	1
ISJ	1
Israel Veterinary Medical Association	1
Istituto Nazionale di Geofisica e Vulcanologia (INGV)	1
Istituto Zooprofilattico Sperimentale dell'Abruzzo e del Molise G. Caporale	1
Italian Society of Silviculture and Forest Ecology (SISEF)	1
Jagellonian University, Cracow	1
Jagiellonian University	1
James Cook University	1
Japan Academy	1
Japan Atherosclerosis Society	1
Japan Epidemiological Association	1
Japan Laser Processing Society (JLPS)	1
Japan Petroleum Institute	1
Japan Poultry Science Association	1
Japan Society for Cell Biology	1
Japan Society for Occupational Health	1
Japan Society of Histochemistry and Cytochemistry	1
Japanese Association for Laboratory Animal Science	1
Japanese Society for Plant Cell and Molecular Biology	1
Japanese Society for the Study of Xenobiotics	1
Japanese Society of Allergology	1
Japanese Society of Breeding	1
Japanese Society of Toxicologic Pathology	1
Japanese Society of Veterinary Science	1
JMIR Publications	1
Johnson Matthey	1
Kare Publishing	1
Kassel University Press	1
Kaunas University of Technology	1
Kent State University Library	1
Kiel Institute for the World Economy	1
King Faisal Specialist Hospital and Research Centre	1
Korean Academy of Asthma, Allergy and Clinical Immunology and Korean Academy of Pediatric Allergy and Respiratory Disease	1
Korean Academy of Medical Sciences	1
Korean Academy of Prosthodontics	1
Korean Association of Orthodontists	1
Korean Breast Cancer Society	1
Korean Neurological Association	1
Korean Neuropsychiatric Association	1
Korean Radiological Society	1
Korean Society for Biochemistry and Molecular Biology	1
Korean Society for Laboratory Medicine	1
Korean Society for the History of Medicine	1
Korean Society of Applied Pharmacology	1
Korean Society of Community Nutrition and the Korean Nutrition Society	1
Korean Society of Ginseng	1
Korean Society of Medical Biochemistry and Molecular Biology	1
Korean Society of Mycology	1
Korean Society of Otorhinolaryngology	1
Korean Society of Phycology	1
Korean Society of Veterinary Science	1
Korean Surgical Society	1
Kowsar Corporation	1
Krakow Polish Physiological Society	1
Kure Iletisim Grubu A S	1
Kurtis srl	1
Kyushu University	1
LEPRA (The British Leprosy Relief Association)	1
Libertas Academica	1
Lithuanian Academy of Sciences	1
Lithuanian Research Centre for Agriculture and Forestry	1
Maejo University	1
Makerere University Medical School	1
Mashhad University of Medical Sciences	1
Max Planck Institute for Demographic Research	1
Max Planck Institute for Solar System Research	1
Max-Planck Institute for Gravitational Physics	1
Medical Association of Nippon Medical School	1
Medical Education Cooperation with Cuba (MEDICC)	1
Medical Library Association	1
Medical University of Bialystok and VERSITA	1
Medicina Oral S.L	1
Medwell Online	1
Medycyna Praktyczna	1
Microtome Publishing	1
Middle East Technical University	1
Military Medical Academy, Belgrade	1
Ministerio de Sanidad y Consumo	1
Ministry of Defence And Aviation	1
Miskolc University Press	1
MIT Press	1
Modern Language Teachers' Association of Sweden	1
Moffitt Cancer Center	1
Molecular Vision	1
Mongabay.com	1
Mount Allison University	1
Multimed Inc.	1
Museum für Tierkunde, Dresden	1
Museum National d'Histoire Naturelle Paris	1
Nagoya University	1
Nanzan Institute for Religion and Culture, Nagoya	1
Nanzan University	1
National Academy of Science of Ukraine	1
National Academy of Sciences of Ukraine	1
National Center for Chronic Disease Prevention and Health Promotion	1
National Folk Museum of Korea	1
National Herbarium of New South Wales, Royal Botanic Gardens and Domain Trust	1
National Institute of Infectious Diseases	1
National Institute of Malaria Research	1
National Institute of Materials Physics, National Institute of Optoelectronics	1
National Institute of Occupational Safety and Health	1
National Prescribing Service	1
National Speleological Society	1
National University of Singapore	1
Naturalis	1
Naturalis Biodiversity Center & Centraalbureau voor Schimmelcultures	1
Nencki Institute of Experimental Biology and Polish Neuroscience Society, PTBUN	1
Neoplasia	1
Nepal Medical Association	1
North Carolina State University	1
Norwegian Geological Society (Norsk Geologisk Forening, NGF)	1
Norwegian Society of Automatic Control	1
Óbuda University	1
Okayama University Medical School	1
Open Access House of Science and Technology	1
Open Learning on Enteric Pathogens	1
Optical Society of America (OSA)	1
Organización Panamericana de la Salud	1
Osaka University	1
Otago Polytechnic	1
Ovidius University, Constanta	1
Pacini Editore SpA	1
Pakistan Agricultural Scientists Forum	1
Park Media	1
Pesticide Science Society of Japan	1
Pharmaceutical Society of Japan	1
Pharmamed Mado	1
Polish Academy of Sciences Publishing	1
Polish Botanical Society	1
Polish Histochemical and Cytochemical Society	1
Polska Akademia Nauk, Instytut Dendrologii	1
Polskie Towarzystwo Kardiologiczne	1
Polskie Towarzystwo Psychiatryczne	1
Pontifical Biblical Institute	1
Pontifícia Universidade Católica de Campinas	1
Pontifícia Universidade Católica do Rio Grande do Sul	1
Portland Press Ltd	1
Portland Press, Biochemical Society	1
Princeton University	1
Professional Medical Publications	1
Public Health Agency of Canada	1
Public Library of Science	1
Purdue University Press	1
Rede Latino-Americana de Materiais - Latin-American Materials Network	1
Regional Euro-Asian Biological Invasions Centre (REABIC)	1
Regional Information Center for Science and Technology	1
Rehabilitation Research and Development Service, Department of Veterans Affairs	1
Resilience Alliance	1
SAHARA	1
SAIIE	1
School of Pharmacy, Shahid Beheshti University of Medical Sciences	1
Science Society of Thailand	1
Seminar for the Interdisciplinary Research of Religions and Ideologies	1
Serbian Academy of Sciences and Arts	1
Serbian Biological Society	1
Serbian Chemical Society	1
Serbian Genetics Society	1
Serbian Medical Society	1
Servicio Nacional de Geología y Minería (SERNAGEOMIN)	1
Shaheed Beheshti University of Medical Sciences	1
Shahid Sadoghi University of Medical Sciences of Yazd	1
Shiraz University of Medical sciences	1
SIMTI Servizi srl	1
Slovene Anthropological Society	1
Slovenian Academy of Sciences and Arts	1
Slovenian Chemical Society	1
Slovenian Medical Association	1
Slovenian Society for Stereology and Quantitative Image Analysis	1
Sociedad Argentina de Botánica	1
Sociedad Argentina de Pediatria	1
Sociedad Chilena de Anatomía	1
Sociedad Chilena de Infectología	1
Sociedad Chilena de Psicología Clínica	1
Sociedad Chilena de Química	1
Sociedad Colombiana de Entomología	1
Sociedad de Cirujanos de Chile	1
Sociedad Española de Cardiología	1
Sociedad Española de Nutrición Parenteral y Enteral	1
Sociedad Española de Psicologia Jurídica y Forense	1
Sociedad Hispano-Luso-Americana de Lepidopterología	1
Sociedad Médica de Santiago	1
Sociedad Mexicana de Física	1
Sociedad Mexicana de Fitogenética	1
Sociedad Química de México	1
Sociedade Botânica de São Paulo	1
Sociedade Botânica do Brasil	1
Sociedade Brasileira da Ciência das Plantas Daninhas	1
Sociedade Brasileira de Anestesiologia	1
Sociedade Brasileira de Cardiologia - SBC	1
Sociedade Brasileira de Ciência do Solo	1
Sociedade Brasileira de Ciência e Tecnologia de Alimentos	1
Sociedade Brasileira de Cirurgia Cardiovascular	1
Sociedade Brasileira de Dermatologia	1
Sociedade Brasileira de Endocrinologia e Metabologia	1
Sociedade Brasileira de Engenharia Agrícola	1
Sociedade Brasileira De Entomologia	1
Sociedade Brasileira de Farmacognosia	1
Sociedade Brasileira de Fitopatologia	1
Sociedade Brasileira de Fruticultura	1
Sociedade Brasileira de Genética	1
Sociedade Brasileira de Ictiologia	1
Sociedade Brasileira de Matemática Aplicada e Computacional	1
Sociedade Brasileira de Medicina do Esporte	1
Sociedade Brasileira de Medicina Tropical - SBMT	1
Sociedade Brasileira de Microbiologia	1
Sociedade Brasileira de Oftalmologia	1
Sociedade Brasileira de Ortopedia e Traumatologia	1
Sociedade Brasileira de Paleontologia	1
Sociedade Brasileira de Pediatria	1
Sociedade Brasileira de Pesquisa Odontológica	1
Sociedade Brasileira de Pneumologia e Tisiologia	1
Sociedade Brasileira de Química	1
Sociedade Brasileira de Química, SBQ	1
Sociedade Brasileira de Reumatologia	1
Sociedade Brasileira de Urologia	1
Sociedade Brasileira de Zoologia	1
Sociedade Brasileira de Zootecnia	1
Sociedade Brasileira para o Desenvolvimento da Pesquisa em Cirurgia	1
Sociedade de Investigações Florestais	1
Società Speleologica Italiana	1
Société Française de Santé Publique	1
Society for Judgment and Decision Making	1
Society for Publication of Acta Dermato-Venereologica	1
Society for Reproduction and Development	1
Society for the Advancement of Philosophy, Zagreb	1
Society of Field Crops Science	1
Society of Laparoendoscopic Surgeons	1
Society of Physical Therapy Science	1
Society of the Chemists and Technologists of Macedonia	1
South African Academy for Science and Arts	1
South African Institution of Civil Engineering	1
South African Society for Animal Science	1
Southern Cross Publishing	1
Spolecnost pro radioelektronicke inzenyrstvi	1
Statistical Institute of Catalonia (Idescat)	1
Statistics Canada	1
Statistics Sweden	1
Stefan cel Mare University of Suceava	1
STFM	1
Studijski centar socijalnog rada	1
Technical Faculty, Bor	1
Technical University of Braunschweig	1
Technical University of Kosice	1
Tecpar	1
Texas Heart Institute	1
Texas State University	1
The American College of Medical Physics and American Institute of Physics	1
The Anthropological Society of Nippon	1
The Brazilian Society of Mechanical Sciences and Engineering	1
The Cleveland Clinic Educational Foundation	1
The Electronic Journal of Combinatorics	1
The Feinstein Institute for Medical Research	1
The Geological Society of Finland	1
The International Society for Fluoride Research	1
The Japan Academy	1
The Japan Endocrine Society	1
The Japan Neurosurgical Society	1
The Japan Society for Analytical Chemistry	1
The Japanese Circulation Society	1
The Japanese Pharmacological Society	1
The Japanese Society of Internal Medicine	1
The Japanese Society of Toxicology	1
The Korean Chemical Society	1
The Korean Society for Parasitology	1
The Korean Society of Pathologists, The Korean Society for Cytopathology	1
The National Athletic Trainers' Association	1
The National Institute of Environmental Health Sciences (NIEHS)	1
The National Institute of Standards and Technology	1
The Natural Science Museum of Barcelona	1
The Oceanography Society (TOS)	1
The Physical Society of the Republic of China	1
The R Foundation for Statistical Computing	1
The Resilience Alliance	1
The Royal Society	1
The Scientific Agricultural Society of Finland	1
The Society for Free Radical Research Japan	1
The Society of Rheology	1
The Spanish Society of Digestive Pathology	1
Tohoku University Medical Press	1
Triveni Enterprises	1
Turkish Biochemical Society	1
Turkish League Against Rheumatism (TLAR)	1
Turkish National Committee for Air Pollution Research and Control	1
Türkiye Sinir ve Ruh Sağlığı Derneği	1
Tusi Mathematical Research Group	1
U.S. Department of Labor	1
U.S. National Center for Infectious Diseases	1
U.S. National Institute on Alcohol Abuse and Alcoholism	1
U.S. National Marine Fisheries Service	1
UNAM, Centro Universitario de Investigaciones Bibliotecológicas	1
Unión Matemática Argentina	1
Univeristy of Oradea Publishing House	1
Universia	1
Universidad Autónoma de Baja California	1
Universidad autónoma del estado de México	1
Universidad Autónoma Metropolitana Unidad Iztapalapa	1
Universidad Autónoma Metropolitana, Unidad Iztapalapa	1
Universidad Católica del Norte	1
Universidad de Barcelona	1
Universidad de Cordoba	1
Universidad de Costa Rica	1
Universidad de Granada, Unversitat Autònoma de Barcelona	1
Universidad de Huelva	1
Universidad de La Sabana	1
Universidad de los Andes (Bogotá)	1
Universidad de Magallanes	1
Universidad de Murcia	1
Universidad de Navarra	1
Universidad de Tarapacá	1
Universidad de Valparaiso	1
Universidad de Zaragoza	1
Universidad del Bío-Bío	1
Universidad del País Vasco, Euskal Herriko Unibertsitatea	1
Universidad del Valle	1
Universidad EAFIT	1
Universidad Federal de Santa Catarina	1
Universidad Nacional Autónoma de México (UNAM)	1
Universidad Nacional de Educación a Distancia	1
Universidad Nacional de La Plata	1
Universidad Nacional de Lanús	1
Universidad Nacional del Centro de la Provincia de Buenos Aires	1
Universidad Simón Bolívar	1
Universidada de Los Lagos	1
Universidade de Aveiro	1
Universidade do Estado do Rio de Janeiro	1
Universidade Estadual de Feira de Santana	1
Universidade Estadual de Londrina	1
Universidade Federal de São Paulo	1
Universidade Federal do Ceará	1
Universidade Federal do Paraná	1
Universidade Federal do Rio de Janeiro	1
Universidade Federal Fluminense	1
Universidade Federal Rural de Pernambuco	1
Universidade Federal Rural Do Semiárido	1
Universität Bielefeld	1
Universitat de les Illes Balears	1
Université de Liège	1
University Library System, University of Pittsburgh	1
University of Agricultural Sciences and Veterinary Medicine, Cluj-Napoca	1
University of Agriculture, Faisalabad	1
University of Belgrade and Academic Mind	1
University of Benin	1
University of Bielefeld	1
University of Hawaii	1
University of Kafkas	1
University of Karachi	1
University of Liege	1
University of Ljubljana	1
University of Michigan	1
University of Nis	1
University of Osijek	1
University of Prince Edward Island	1
University of Pula	1
University of Rijeka	1
University of Southern California	1
University of Surrey	1
University of Szeged, Bolyai Institute	1
University of the Basque Country	1
University of the Free State	1
University of the West Indies	1
University of Uludag	1
University of Veterinary and Pharmaceutical Sciences, Brno	1
University of Waikato	1
University of Windsor	1
University of Wisconsin	1
Unversidade Federal do Rio de Janeiro	1
Upsala Medical Society	1
Utrecht University, Maastricht University, Groningen University	1
Veterinary Solutions	1
Viguera Editores, S.L.	1
VUC Praha a.s.	1
Water Research Commission	1
World Health Organization	1
Wroclaw University of Technology	1
Wydawnictwo Uniwersytetu Wrocławskiego	1
Yonago Acta medica	1
Yonsei University College of Medicine	1
Zarqa Private University	1
	1216

## Sheet: SNU OA articles
SCI articles by SNU during recent 20 years
Type	No articles
OAJ	23813
Toll	363300
Total	387113
	0.0615
Type	No journals
OAJ	386
Toll	6043
총합계	6429
	0.06

## Sheet: OA journals in WoS
행 레이블	개수 : Title
SCIE OAJ	982
SSCI OAJ	165
AHCI OAJ	69
SCIE Toll	7058
SSCI Toll	2821
AHCI Toll	1327
	12422
The proportion of OA journals among 12,422 WoS SCI journals was 9.8% (1216 titles).
The proportion of OA journals among 8,040 WoS SCIE journals was 12.2% (982 titles).
The proportion of OA journals among 2,986 WoS SSCI journals was 11.1% (165 titles).
The proportion of OA journals among 1,396 WoS AHCI journals was 4,9% (69 titles).

## Sheet: OAJ Impact factor
SCIE OAJ	1.58136
SSCI OAJ	0.706515
SCIE Toll	2.20049
SSCI Toll	1.1988

## Sheet: Scopus OAJ
Scopus
OAJ	2730
OAJ not DOAJ	194
Toll	31351
The proportion of OA journals among 34,275 Scopus journals was 8.5%.
The proportion of OA journals among 6067 life science Scopus journals was 13.9% (848 titles).
The proportion of OA journals among 9063 social science Scopus journals was 6.6% (602 titles).
The proportion of OA journals among 12,640 health science Scopus journals was 9.7% (1221 titles).
The proportion of OA journals among 2880 arts and humanities Scopus journals was 5.3% (154 titles).
